# Supplementary material for: How clinically relevant and inclusive are prostate cell lines?
Source: Research Square preprint supplement (doi:10.21203/rs.3.rs-6355469/v1), 2025-05-07
Supplement: Supplementary file 1 [file 306edf7e5b849341396b2bb9.xlsx]

## Sheet: NCIH660
1 alteration the same	2-4 alterations the same	5-6 alterations the same
prad_mskcc_2017:P-0000449	prad_tcga:prad_mskcc_2017:P-0000449
prad_mskcc_2017:P-0001426	prad_tcga:prad_mskcc_2017:P-0001426
prad_mskcc_2017:P-0000140	prad_tcga:prad_mskcc_2017:P-0000140
prad_mskcc_2017:P-0000318	prad_tcga:prad_mskcc_2017:P-0000318
prad_mskcc_2017:P-0000610	prad_tcga:prad_mskcc_2017:P-0000610
prad_mskcc_2017:P-0000640	prad_tcga:prad_mskcc_2017:P-0000640
prad_mskcc_2017:P-0000683	prad_tcga:prad_mskcc_2017:P-0000683
prad_mskcc_2017:P-0000828	prad_tcga:prad_mskcc_2017:P-0000828
prad_mskcc_2017:P-0000888	prad_tcga:prad_mskcc_2017:P-0000888
prad_mskcc_2017:P-0000935	prad_tcga:prad_mskcc_2017:P-0000935
prad_mskcc_2017:P-0000966	prad_tcga:prad_mskcc_2017:P-0000966
prad_mskcc_2017:P-0001108	prad_tcga:prad_mskcc_2017:P-0001108
prad_mskcc_2017:P-0001141	prad_tcga:prad_mskcc_2017:P-0001141
prad_mskcc_2017:P-0001274	prad_tcga:prad_mskcc_2017:P-0001274
prad_mskcc_2017:P-0001446	prad_tcga:prad_mskcc_2017:P-0001446
prad_mskcc_2017:P-0001698	prad_tcga:prad_mskcc_2017:P-0001698
prad_mskcc_2017:P-0002123	prad_tcga:prad_mskcc_2017:P-0002123
prad_mskcc_2017:P-0002149	prad_tcga:prad_mskcc_2017:P-0002149
prad_mskcc_2017:P-0002364	prad_tcga:prad_mskcc_2017:P-0002364
prad_mskcc_2017:P-0002382	prad_tcga:prad_mskcc_2017:P-0002382
prad_mskcc_2017:P-0002901	prad_tcga:prad_mskcc_2017:P-0002901
prad_mskcc_2017:P-0002961	prad_tcga:prad_mskcc_2017:P-0002961
prad_mskcc_2017:P-0002974	prad_tcga:prad_mskcc_2017:P-0002974
prad_mskcc_2017:P-0002990	prad_tcga:prad_mskcc_2017:P-0002990
prad_mskcc_2017:P-0002999	prad_tcga:prad_mskcc_2017:P-0002999
prad_mskcc_2017:P-0003033	prad_tcga:prad_mskcc_2017:P-0003033
prad_mskcc_2017:P-0003040	prad_tcga:prad_mskcc_2017:P-0003040
prad_mskcc_2017:P-0003226	prad_tcga:prad_mskcc_2017:P-0003226
prad_mskcc_2017:P-0003419	prad_tcga:prad_mskcc_2017:P-0003419
prad_mskcc_2017:P-0003468	prad_tcga:prad_mskcc_2017:P-0003468
prad_mskcc_2017:P-0003535	prad_tcga:prad_mskcc_2017:P-0003535
prad_mskcc_2017:P-0003541	prad_tcga:prad_mskcc_2017:P-0003541
prad_mskcc_2017:P-0003626	prad_tcga:prad_mskcc_2017:P-0003626
prad_mskcc_2017:P-0003665	prad_tcga:prad_mskcc_2017:P-0003665
prad_mskcc_2017:P-0003758	prad_tcga:prad_mskcc_2017:P-0003758
prad_mskcc_2017:P-0004312	prad_tcga:prad_mskcc_2017:P-0004312
prad_mskcc_2017:P-0004482	prad_tcga:prad_mskcc_2017:P-0004482
prad_mskcc_2017:P-0004826	prad_tcga:prad_mskcc_2017:P-0004826
prad_mskcc_2017:P-0005045	prad_tcga:prad_mskcc_2017:P-0005045
prad_mskcc_2017:P-0005436	prad_tcga:prad_mskcc_2017:P-0005436
prad_mskcc_2017:P-0005454	prad_tcga:prad_mskcc_2017:P-0005454
prad_mskcc_2017:P-0005596	prad_tcga:prad_mskcc_2017:P-0005596
prad_mskcc_2017:P-0005768	prad_tcga:prad_mskcc_2017:P-0005768
prad_mskcc_2017:P-0005806	prad_tcga:prad_mskcc_2017:P-0005806
prad_mskcc_2017:P-0006389	prad_tcga:prad_mskcc_2017:P-0006389
prad_mskcc_2017:P-0006635	prad_tcga:prad_mskcc_2017:P-0006635
prad_mskcc_2017:P-0006670	prad_tcga:prad_mskcc_2017:P-0006670
prad_mskcc_2017:P-0006856	prad_tcga:prad_mskcc_2017:P-0006856
prad_mskcc_2017:P-0006994	prad_pik3r1_msk_2021:prad_mskcc_2017:P-0006994
prad_mskcc_2017:P-0007043	prad_pik3r1_msk_2021:prad_mskcc_2017:P-0007043
prad_mskcc_2017:P-0007098	prad_p1000:prad_mskcc_2017:P-0007098
prad_mskcc_2017:P-0007547	prad_p1000:prad_mskcc_2017:P-0007547
prad_mskcc_2017:P-0007749	prad_p1000:prad_mskcc_2017:P-0007749
prad_mskcc_2017:P-0008074	prad_p1000:prad_mskcc_2017:P-0008074
prad_mskcc_2017:P-0008206	prad_p1000:prad_mskcc_2017:P-0008206
prad_mskcc_2017:P-0008452	prad_p1000:prad_mskcc_2017:P-0008452
prad_mskcc_2017:P-0008852	prad_p1000:prad_mskcc_2017:P-0008852
prad_mskcc_2017:P-0008960	prad_p1000:prad_mskcc_2017:P-0008960
prad_mskcc_2017:P-0008966	prad_p1000:prad_mskcc_2017:P-0008966
prad_mskcc_2017:P-0000755	prad_p1000:prad_mskcc_2017:P-0000755
prad_mskcc_2017:P-0004910	prad_msk_stopsack_2021:prad_mskcc_2017:P-0004910
prad_mskcc_2017:P-0002499	prad_msk_stopsack_2021:prad_mskcc_2017:P-0002499
prad_mskcc_2017:P-0002898	prad_su2c_2019:prad_mskcc_2017:P-0002898
prad_mskcc_2017:P-0005216	prad_su2c_2019:prad_mskcc_2017:P-0005216
prad_mskcc_2017:P-0005697	prad_su2c_2019:prad_mskcc_2017:P-0005697
prad_mskcc_2017:P-0005976	prad_su2c_2019:prad_mskcc_2017:P-0005976
prad_mskcc_2017:P-0009090	prad_su2c_2019:prad_mskcc_2017:P-0009090
prad_mskcc_2017:P-0000197	prad_su2c_2019:prad_mskcc_2017:P-0000197
nepc_wcm_2016:WCMC63	prad_su2c_2019:nepc_wcm_2016:WCMC63
nepc_wcm_2016:WCMC7520	prad_su2c_2019:nepc_wcm_2016:WCMC7520
nepc_wcm_2016:WCMC12	prad_su2c_2019:nepc_wcm_2016:WCMC12
nepc_wcm_2016:WCMC252	prad_su2c_2019:nepc_wcm_2016:WCMC252
nepc_wcm_2016:WCMC26731	prad_su2c_2019:nepc_wcm_2016:WCMC26731
nepc_wcm_2016:WCMC59	prad_su2c_2019:nepc_wcm_2016:WCMC59
prad_tcga:TCGA-CH-5761	prad_su2c_2019:prad_tcga:TCGA-CH-5761
prad_tcga:TCGA-HC-7213	prad_su2c_2019:prad_tcga:TCGA-HC-7213
prad_tcga:TCGA-XK-AAIV	prad_su2c_2019:prad_tcga:TCGA-XK-AAIV
prad_tcga:TCGA-XQ-A8TA	prad_su2c_2019:prad_tcga:TCGA-XQ-A8TA
prad_tcga:TCGA-FC-A4JI	prad_su2c_2019:prad_tcga:TCGA-FC-A4JI
prad_tcga:TCGA-HC-A4ZV	prad_su2c_2019:prad_tcga:TCGA-HC-A4ZV
prad_tcga:TCGA-ZG-A9LB	prad_su2c_2019:prad_tcga:TCGA-ZG-A9LB
prad_tcga:TCGA-KK-A7AW	prad_su2c_2019:prad_tcga:TCGA-KK-A7AW
prad_tcga:TCGA-J4-A67N	prad_su2c_2019:prad_tcga:TCGA-J4-A67N
prad_tcga:TCGA-KK-A7AY	prad_su2c_2019:prad_tcga:TCGA-KK-A7AY
prad_tcga:TCGA-EJ-A46F	prad_su2c_2019:prad_tcga:TCGA-EJ-A46F
prad_tcga:TCGA-EJ-5526	prad_su2c_2019:prad_tcga:TCGA-EJ-5526
prad_tcga:TCGA-CH-5762	prad_su2c_2019:prad_tcga:TCGA-CH-5762
prad_tcga:TCGA-EJ-5498	prad_su2c_2019:prad_tcga:TCGA-EJ-5498
prad_tcga:TCGA-EJ-5505	prad_su2c_2019:prad_tcga:TCGA-EJ-5505
prad_tcga:TCGA-EJ-5506	prad_su2c_2019:prad_tcga:TCGA-EJ-5506
prad_tcga:TCGA-EJ-5508	prad_su2c_2019:prad_tcga:TCGA-EJ-5508
prad_tcga:TCGA-EJ-5517	prad_su2c_2019:prad_tcga:TCGA-EJ-5517
prad_tcga:TCGA-CH-5769	prad_su2c_2019:prad_tcga:TCGA-CH-5769
prad_tcga:TCGA-HC-A6AN	prad_su2c_2019:prad_tcga:TCGA-HC-A6AN
prad_tcga:TCGA-EJ-7784	prad_su2c_2019:prad_tcga:TCGA-EJ-7784
prad_tcga:TCGA-ZG-A9L1	prad_su2c_2019:prad_tcga:TCGA-ZG-A9L1
prad_tcga:TCGA-2A-A8VT	prad_su2c_2019:prad_tcga:TCGA-2A-A8VT
prad_tcga:TCGA-EJ-A46H	prad_su2c_2019:prad_tcga:TCGA-EJ-A46H
prad_tcga:TCGA-EJ-5511	prad_su2c_2019:prad_tcga:TCGA-EJ-5511
prad_tcga:TCGA-EJ-7785	prad_su2c_2019:prad_tcga:TCGA-EJ-7785
prad_tcga:TCGA-EJ-7794	prad_su2c_2019:prad_tcga:TCGA-EJ-7794
prad_tcga:TCGA-HC-A8CY	prad_su2c_2019:prad_tcga:TCGA-HC-A8CY
prad_tcga:TCGA-HC-7211	prad_su2c_2019:prad_tcga:TCGA-HC-7211
prad_tcga:TCGA-V1-A9OA	prad_su2c_2019:prad_tcga:TCGA-V1-A9OA
prad_tcga:TCGA-YL-A8SJ	prad_su2c_2019:prad_tcga:TCGA-YL-A8SJ
prad_tcga:TCGA-G9-6363	prad_su2c_2019:prad_tcga:TCGA-G9-6363
prad_tcga:TCGA-J4-8200	prad_su2c_2019:prad_tcga:TCGA-J4-8200
prad_tcga:TCGA-KK-A8IF	prad_su2c_2019:prad_tcga:TCGA-KK-A8IF
prad_tcga:TCGA-J4-A83J	prad_su2c_2019:prad_tcga:TCGA-J4-A83J
prad_tcga:TCGA-G9-A9S0	prad_su2c_2019:prad_tcga:TCGA-G9-A9S0
prad_tcga:TCGA-EJ-AB20	prad_su2c_2019:prad_tcga:TCGA-EJ-AB20
prad_tcga:TCGA-G9-A9S7	prad_su2c_2019:prad_tcga:TCGA-G9-A9S7
prad_tcga:TCGA-2A-A8VL	prad_su2c_2019:prad_tcga:TCGA-2A-A8VL
prad_tcga:TCGA-ZG-A9M4	prad_su2c_2019:prad_tcga:TCGA-ZG-A9M4
prad_tcga:TCGA-FC-A8O0	prad_su2c_2019:prad_tcga:TCGA-FC-A8O0
prad_tcga:TCGA-M7-A71Z	prad_su2c_2019:prad_tcga:TCGA-M7-A71Z
prad_tcga:TCGA-HI-7171	prad_su2c_2019:prad_tcga:TCGA-HI-7171
prad_tcga:TCGA-KK-A7AQ	prad_su2c_2019:prad_tcga:TCGA-KK-A7AQ
prad_tcga:TCGA-KK-A7AU	prad_su2c_2019:prad_tcga:TCGA-KK-A7AU
prad_tcga:TCGA-KK-A7B3	prad_su2c_2019:prad_tcga:TCGA-KK-A7B3
prad_tcga:TCGA-KK-A8IH	prad_su2c_2019:prad_tcga:TCGA-KK-A8IH
prad_tcga:TCGA-KK-A8II	prad_su2c_2019:prad_tcga:TCGA-KK-A8II
prad_tcga:TCGA-KK-A8IM	prad_mcspc_mskcc_2020:prad_tcga:TCGA-KK-A8IM
prad_tcga:TCGA-V1-A9OL	prad_mskcc:prad_tcga:TCGA-V1-A9OL
prad_tcga:TCGA-VN-A88Q	prad_mskcc:prad_tcga:TCGA-VN-A88Q
prad_tcga:TCGA-VP-A87J	prad_mskcc:prad_tcga:TCGA-VP-A87J
prad_tcga:TCGA-VP-A872	prad_mskcc:prad_tcga:TCGA-VP-A872
prad_tcga:TCGA-XQ-A8TB	prad_mskcc:prad_tcga:TCGA-XQ-A8TB
prad_tcga:TCGA-YL-A8HK	prad_mskcc:prad_tcga:TCGA-YL-A8HK
prad_tcga:TCGA-YL-A8HL	prad_mskcc:prad_tcga:TCGA-YL-A8HL
prad_tcga:TCGA-YL-A8SA	prad_mskcc:prad_tcga:TCGA-YL-A8SA
prad_tcga:TCGA-ZG-A9L4	prad_mskcc:prad_tcga:TCGA-ZG-A9L4
prad_tcga:TCGA-ZG-A9LM	prad_mskcc:prad_tcga:TCGA-ZG-A9LM
prad_tcga:TCGA-ZG-A9LY	prad_mskcc:prad_tcga:TCGA-ZG-A9LY
prad_tcga:TCGA-ZG-A9LZ	prad_mskcc:prad_tcga:TCGA-ZG-A9LZ
prad_tcga:TCGA-V1-A9Z8	prad_mskcc:prad_tcga:TCGA-V1-A9Z8
prad_tcga:TCGA-EJ-5499	prad_mskcc:prad_tcga:TCGA-EJ-5499
prad_tcga:TCGA-G9-6356	prostate_dkfz_2018:prad_tcga:TCGA-G9-6356
prad_tcga:TCGA-G9-7525	prostate_dkfz_2018:prad_tcga:TCGA-G9-7525
prad_tcga:TCGA-HC-7749	prostate_dkfz_2018:prad_tcga:TCGA-HC-7749
prad_tcga:TCGA-J9-A8CM	prostate_dkfz_2018:prad_tcga:TCGA-J9-A8CM
prad_tcga:TCGA-KK-A8IC
prad_tcga:TCGA-TP-A8TT
prad_tcga:TCGA-V1-A9O9
prad_tcga:TCGA-VN-A88L
prad_tcga:TCGA-XJ-A9DI
prad_tcga:TCGA-ZG-A8QZ
prad_tcga:TCGA-ZG-A9MC
prad_msk_stopsack_2021:P-0017543
prad_msk_stopsack_2021:P-0032801
prad_msk_stopsack_2021:P-0013844
prad_msk_stopsack_2021:P-0000755
prad_msk_stopsack_2021:P-0002499
prad_msk_stopsack_2021:P-0002898
prad_msk_stopsack_2021:P-0005216
prad_msk_stopsack_2021:P-0005697
prad_msk_stopsack_2021:P-0005976
prad_msk_stopsack_2021:P-0009090
prad_msk_stopsack_2021:P-0012543
prad_msk_stopsack_2021:P-0013022
prad_msk_stopsack_2021:P-0017889
prad_msk_stopsack_2021:P-0018147
prad_msk_stopsack_2021:P-0019520
prad_msk_stopsack_2021:P-0019840
prad_msk_stopsack_2021:P-0020218
prad_msk_stopsack_2021:P-0021854
prad_msk_stopsack_2021:P-0022383
prad_msk_stopsack_2021:P-0023345
prad_msk_stopsack_2021:P-0029469
prad_msk_stopsack_2021:P-0030202
prad_msk_stopsack_2021:P-0031720
prad_msk_stopsack_2021:P-0032154
prad_msk_stopsack_2021:P-0032868
prad_msk_stopsack_2021:P-0044915
prad_msk_stopsack_2021:P-0049144
prad_msk_stopsack_2021:P-0021310
prad_msk_stopsack_2021:P-0035426
prad_msk_stopsack_2021:P-0004910
prad_msk_stopsack_2021:P-0011465
prad_msk_stopsack_2021:P-0030717
prad_msk_stopsack_2021:P-0036029
prad_msk_stopsack_2021:P-0049590
prad_msk_stopsack_2021:P-0008682
prad_msk_stopsack_2021:P-0004892
prad_msk_stopsack_2021:P-0009656
prad_msk_stopsack_2021:P-0026447
prad_msk_stopsack_2021:P-0035208
prad_msk_stopsack_2021:P-0001426
prad_msk_stopsack_2021:P-0026409
prad_msk_stopsack_2021:P-0003945
prad_msk_stopsack_2021:P-0031712
prad_msk_stopsack_2021:P-0000140
prad_msk_stopsack_2021:P-0000610
prad_msk_stopsack_2021:P-0000683
prad_msk_stopsack_2021:P-0000828
prad_msk_stopsack_2021:P-0000888
prad_msk_stopsack_2021:P-0000935
prad_msk_stopsack_2021:P-0001108
prad_msk_stopsack_2021:P-0001274
prad_msk_stopsack_2021:P-0001446
prad_msk_stopsack_2021:P-0001698
prad_msk_stopsack_2021:P-0002149
prad_msk_stopsack_2021:P-0002364
prad_msk_stopsack_2021:P-0002382
prad_msk_stopsack_2021:P-0002901
prad_msk_stopsack_2021:P-0002961
prad_msk_stopsack_2021:P-0002974
prad_msk_stopsack_2021:P-0002990
prad_msk_stopsack_2021:P-0002999
prad_msk_stopsack_2021:P-0003033
prad_msk_stopsack_2021:P-0003040
prad_msk_stopsack_2021:P-0003468
prad_msk_stopsack_2021:P-0003535
prad_msk_stopsack_2021:P-0003626
prad_msk_stopsack_2021:P-0003665
prad_msk_stopsack_2021:P-0003758
prad_msk_stopsack_2021:P-0004312
prad_msk_stopsack_2021:P-0004482
prad_msk_stopsack_2021:P-0004826
prad_msk_stopsack_2021:P-0005045
prad_msk_stopsack_2021:P-0005436
prad_msk_stopsack_2021:P-0005454
prad_msk_stopsack_2021:P-0005596
prad_msk_stopsack_2021:P-0005768
prad_msk_stopsack_2021:P-0005806
prad_msk_stopsack_2021:P-0006389
prad_msk_stopsack_2021:P-0006635
prad_msk_stopsack_2021:P-0006670
prad_msk_stopsack_2021:P-0006767
prad_msk_stopsack_2021:P-0006856
prad_msk_stopsack_2021:P-0006994
prad_msk_stopsack_2021:P-0007043
prad_msk_stopsack_2021:P-0007098
prad_msk_stopsack_2021:P-0007547
prad_msk_stopsack_2021:P-0007749
prad_msk_stopsack_2021:P-0008074
prad_msk_stopsack_2021:P-0008206
prad_msk_stopsack_2021:P-0008452
prad_msk_stopsack_2021:P-0008852
prad_msk_stopsack_2021:P-0008966
prad_msk_stopsack_2021:P-0009374
prad_msk_stopsack_2021:P-0009543
prad_msk_stopsack_2021:P-0009654
prad_msk_stopsack_2021:P-0009687
prad_msk_stopsack_2021:P-0010015
prad_msk_stopsack_2021:P-0010657
prad_msk_stopsack_2021:P-0011090
prad_msk_stopsack_2021:P-0011096
prad_msk_stopsack_2021:P-0011377
prad_msk_stopsack_2021:P-0011483
prad_msk_stopsack_2021:P-0012030
prad_msk_stopsack_2021:P-0012048
prad_msk_stopsack_2021:P-0012141
prad_msk_stopsack_2021:P-0012197
prad_msk_stopsack_2021:P-0012368
prad_msk_stopsack_2021:P-0012914
prad_msk_stopsack_2021:P-0013038
prad_msk_stopsack_2021:P-0013116
prad_msk_stopsack_2021:P-0013457
prad_msk_stopsack_2021:P-0013465
prad_msk_stopsack_2021:P-0013674
prad_msk_stopsack_2021:P-0013729
prad_msk_stopsack_2021:P-0013732
prad_msk_stopsack_2021:P-0013810
prad_msk_stopsack_2021:P-0013936
prad_msk_stopsack_2021:P-0014004
prad_msk_stopsack_2021:P-0014076
prad_msk_stopsack_2021:P-0014438
prad_msk_stopsack_2021:P-0014523
prad_msk_stopsack_2021:P-0014629
prad_msk_stopsack_2021:P-0014686
prad_msk_stopsack_2021:P-0014841
prad_msk_stopsack_2021:P-0015209
prad_msk_stopsack_2021:P-0015628
prad_msk_stopsack_2021:P-0015744
prad_msk_stopsack_2021:P-0015837
prad_msk_stopsack_2021:P-0015960
prad_msk_stopsack_2021:P-0016015
prad_msk_stopsack_2021:P-0016134
prad_msk_stopsack_2021:P-0016325
prad_msk_stopsack_2021:P-0016386
prad_msk_stopsack_2021:P-0016396
prad_msk_stopsack_2021:P-0016405
prad_msk_stopsack_2021:P-0016548
prad_msk_stopsack_2021:P-0016733
prad_msk_stopsack_2021:P-0016812
prad_msk_stopsack_2021:P-0016961
prad_msk_stopsack_2021:P-0017232
prad_msk_stopsack_2021:P-0017262
prad_msk_stopsack_2021:P-0017491
prad_msk_stopsack_2021:P-0017605
prad_msk_stopsack_2021:P-0017730
prad_msk_stopsack_2021:P-0017844
prad_msk_stopsack_2021:P-0017882
prad_msk_stopsack_2021:P-0017886
prad_msk_stopsack_2021:P-0018235
prad_msk_stopsack_2021:P-0018315
prad_msk_stopsack_2021:P-0018605
prad_msk_stopsack_2021:P-0018627
prad_msk_stopsack_2021:P-0018713
prad_msk_stopsack_2021:P-0018791
prad_msk_stopsack_2021:P-0019030
prad_msk_stopsack_2021:P-0019420
prad_msk_stopsack_2021:P-0019830
prad_msk_stopsack_2021:P-0019930
prad_msk_stopsack_2021:P-0020111
prad_msk_stopsack_2021:P-0020482
prad_msk_stopsack_2021:P-0020792
prad_msk_stopsack_2021:P-0020812
prad_msk_stopsack_2021:P-0020984
prad_msk_stopsack_2021:P-0021023
prad_msk_stopsack_2021:P-0021104
prad_msk_stopsack_2021:P-0021342
prad_msk_stopsack_2021:P-0021626
prad_msk_stopsack_2021:P-0021723
prad_msk_stopsack_2021:P-0021728
prad_msk_stopsack_2021:P-0021792
prad_msk_stopsack_2021:P-0022197
prad_msk_stopsack_2021:P-0022249
prad_msk_stopsack_2021:P-0022430
prad_msk_stopsack_2021:P-0022437
prad_msk_stopsack_2021:P-0022439
prad_msk_stopsack_2021:P-0022470
prad_msk_stopsack_2021:P-0022611
prad_msk_stopsack_2021:P-0022700
prad_msk_stopsack_2021:P-0022782
prad_msk_stopsack_2021:P-0023030
prad_msk_stopsack_2021:P-0023249
prad_msk_stopsack_2021:P-0023276
prad_msk_stopsack_2021:P-0023318
prad_msk_stopsack_2021:P-0023546
prad_msk_stopsack_2021:P-0023666
prad_msk_stopsack_2021:P-0024220
prad_msk_stopsack_2021:P-0024538
prad_msk_stopsack_2021:P-0024598
prad_msk_stopsack_2021:P-0025044
prad_msk_stopsack_2021:P-0025139
prad_msk_stopsack_2021:P-0025150
prad_msk_stopsack_2021:P-0025332
prad_msk_stopsack_2021:P-0025494
prad_msk_stopsack_2021:P-0025562
prad_msk_stopsack_2021:P-0025571
prad_msk_stopsack_2021:P-0026072
prad_msk_stopsack_2021:P-0026152
prad_msk_stopsack_2021:P-0026153
prad_msk_stopsack_2021:P-0026162
prad_msk_stopsack_2021:P-0026202
prad_msk_stopsack_2021:P-0026228
prad_msk_stopsack_2021:P-0026369
prad_msk_stopsack_2021:P-0026395
prad_msk_stopsack_2021:P-0026673
prad_msk_stopsack_2021:P-0026774
prad_msk_stopsack_2021:P-0026808
prad_msk_stopsack_2021:P-0027210
prad_msk_stopsack_2021:P-0027293
prad_msk_stopsack_2021:P-0027526
prad_msk_stopsack_2021:P-0027722
prad_msk_stopsack_2021:P-0027823
prad_msk_stopsack_2021:P-0028090
prad_msk_stopsack_2021:P-0028167
prad_msk_stopsack_2021:P-0028569
prad_msk_stopsack_2021:P-0029339
prad_msk_stopsack_2021:P-0029523
prad_msk_stopsack_2021:P-0029655
prad_msk_stopsack_2021:P-0029796
prad_msk_stopsack_2021:P-0029948
prad_msk_stopsack_2021:P-0030086
prad_msk_stopsack_2021:P-0030521
prad_msk_stopsack_2021:P-0030801
prad_msk_stopsack_2021:P-0031178
prad_msk_stopsack_2021:P-0031991
prad_msk_stopsack_2021:P-0032027
prad_msk_stopsack_2021:P-0032194
prad_msk_stopsack_2021:P-0032651
prad_msk_stopsack_2021:P-0032799
prad_msk_stopsack_2021:P-0033105
prad_msk_stopsack_2021:P-0033126
prad_msk_stopsack_2021:P-0033226
prad_msk_stopsack_2021:P-0033660
prad_msk_stopsack_2021:P-0034327
prad_msk_stopsack_2021:P-0034431
prad_msk_stopsack_2021:P-0035284
prad_msk_stopsack_2021:P-0035818
prad_msk_stopsack_2021:P-0036007
prad_msk_stopsack_2021:P-0036235
prad_msk_stopsack_2021:P-0036349
prad_msk_stopsack_2021:P-0036351
prad_msk_stopsack_2021:P-0037029
prad_msk_stopsack_2021:P-0037572
prad_msk_stopsack_2021:P-0037664
prad_msk_stopsack_2021:P-0037689
prad_msk_stopsack_2021:P-0037701
prad_msk_stopsack_2021:P-0037814
prad_msk_stopsack_2021:P-0038198
prad_msk_stopsack_2021:P-0038369
prad_msk_stopsack_2021:P-0039006
prad_msk_stopsack_2021:P-0039234
prad_msk_stopsack_2021:P-0040243
prad_msk_stopsack_2021:P-0040519
prad_msk_stopsack_2021:P-0040786
prad_msk_stopsack_2021:P-0041034
prad_msk_stopsack_2021:P-0041103
prad_msk_stopsack_2021:P-0041549
prad_msk_stopsack_2021:P-0041944
prad_msk_stopsack_2021:P-0041945
prad_msk_stopsack_2021:P-0042252
prad_msk_stopsack_2021:P-0042583
prad_msk_stopsack_2021:P-0042663
prad_msk_stopsack_2021:P-0043029
prad_msk_stopsack_2021:P-0043158
prad_msk_stopsack_2021:P-0043323
prad_msk_stopsack_2021:P-0043325
prad_msk_stopsack_2021:P-0043520
prad_msk_stopsack_2021:P-0043583
prad_msk_stopsack_2021:P-0043708
prad_msk_stopsack_2021:P-0044245
prad_msk_stopsack_2021:P-0044256
prad_msk_stopsack_2021:P-0044288
prad_msk_stopsack_2021:P-0045146
prad_msk_stopsack_2021:P-0045289
prad_msk_stopsack_2021:P-0045358
prad_msk_stopsack_2021:P-0045856
prad_msk_stopsack_2021:P-0046881
prad_msk_stopsack_2021:P-0047937
prad_msk_stopsack_2021:P-0047959
prad_msk_stopsack_2021:P-0048357
prad_msk_stopsack_2021:P-0048510
prad_msk_stopsack_2021:P-0048977
prad_msk_stopsack_2021:P-0049886
prad_msk_stopsack_2021:P-0050083
prad_msk_stopsack_2021:P-0050123
prad_msk_stopsack_2021:P-0050289
prad_msk_stopsack_2021:P-0050540
prad_msk_stopsack_2021:P-0050552
prad_p1000:TCGA-FC-A4JI
prad_p1000:TCGA-HC-8265
prad_p1000:03-082H1_LIVER
prad_p1000:SC_9076
prad_p1000:AAPC-IP_LG-057-Tumor-SM-3NC6T
prad_p1000:MO_1421
prad_p1000:MO_1473
prad_p1000:PM2
prad_p1000:PM139
prad_p1000:PR-0427
prad_p1000:PRAD-STID18248-Tumor-SM-1RCU7
prad_p1000:PRAD-01115343-SM-6VZ7N
prad_p1000:PRAD-6115398.0-SM-7LGUK
prad_p1000:PROS01448-1115200-SM-5SGU4
prad_p1000:PROS01448-1115202-SM-5SGU5
prad_p1000:PROS01448-6115242-SM-67ES1
prad_p1000:PROS11496-6115319-SM-6CNQ3
prad_p1000:PROS12319B-SU2C-06115114-SM-4W2N9
prad_p1000:SC_9038
prad_p1000:SC_9054
prad_p1000:SC_9065
prad_p1000:SC_9091
prad_p1000:SC_9107
prad_p1000:SC_9114
prad_p1000:SC_9136
prad_p1000:SC_9148
prad_p1000:SC_9151
prad_p1000:TCGA-2A-A8VV
prad_p1000:TCGA-CH-5751
prad_p1000:TCGA-CH-5767
prad_p1000:TCGA-G9-6361
prad_p1000:TCGA-HC-A4ZV
prad_p1000:TCGA-HC-7078
prad_p1000:TCGA-KK-A7AZ
prad_p1000:TCGA-V1-A8MF
prad_p1000:TCGA-V1-A8WW
prad_p1000:TCGA-V1-A9O5
prad_p1000:TCGA-V1-A9OL
prad_p1000:TCGA-YL-A9WY
prad_p1000:TCGA-ZG-A9L9
prad_p1000:TCGA-ZG-A9LB
prad_p1000:TP_2010
prad_p1000:11040
prad_p1000:08-037F1_LIVER
prad_p1000:12-021H4_LIVER
prad_p1000:TCGA-HC-7747
prad_p1000:TCGA-J4-A67R
prad_p1000:TCGA-KK-A8ID
prad_p1000:12729
prad_p1000:TCGA-EJ-5525
prad_p1000:MO_1410
prad_p1000:PR-04-903
prad_p1000:99-091J_LN
prad_p1000:P02-1562
prad_p1000:PM10
prad_p1000:TCGA-EJ-A65E
prad_p1000:TCGA-G9-6498
prad_p1000:TCGA-KC-A4BN
prad_p1000:TCGA-V1-A8MU
prad_p1000:TCGA-ZG-A8QY
prad_p1000:26731
prad_p1000:SC_9036
prad_p1000:TCGA-EJ-5505
prad_p1000:TCGA-KK-A59V
prad_p1000:TCGA-EJ-7327
prad_p1000:01-120A1_LIVER
prad_p1000:03-139E3_RETROPERITONEAL
prad_p1000:03-192B_LUNG
prad_p1000:05-011G4_LUNG
prad_p1000:06-134H1_LN
prad_p1000:08-006H1_LN
prad_p1000:11-028L1_LUNG
prad_p1000:12-011I7_LN
prad_p1000:MO_1020
prad_p1000:MO_1054
prad_p1000:MO_1084
prad_p1000:MO_1095
prad_p1000:MO_1124
prad_p1000:MO_1161
prad_p1000:MO_1192
prad_p1000:MO_1202
prad_p1000:MO_1215
prad_p1000:MO_1249
prad_p1000:MO_1337
prad_p1000:P03-1334
prad_p1000:P03-1906
prad_p1000:P04-1084
prad_p1000:P04-1243
prad_p1000:P06-4428
prad_p1000:P09-1580
prad_p1000:PM15
prad_p1000:PM119
prad_p1000:PM159
prad_p1000:PR-01-1934
prad_p1000:PR-01-2554
prad_p1000:PR-02-1082
prad_p1000:PR-02-2072
prad_p1000:PR-03-1026
prad_p1000:PR-06-1651
prad_p1000:PR-09-3566
prad_p1000:PR-09-5094
prad_p1000:PR-0415
prad_p1000:PR-1024
prad_p1000:PRAD-6115387.0-SM-7LGU9
prad_p1000:PRAD-6115390.0-SM-7LGUC
prad_p1000:PRAD-6115394.0-SM-7LGUG
prad_p1000:PRAD-6115395.0-SM-7LGUH
prad_p1000:PRAD-6115397.0-SM-7LGUJ
prad_p1000:PRAD-6115400.0-SM-7LGUM
prad_p1000:PRAD-6115401.0-SM-7LGUO
prad_p1000:PRAD-6115403.0-SM-7LGUQ
prad_p1000:PROS01448-DFCI.10-448.P05-SM-581SL
prad_p1000:PROS01448-DFCI.10-448.P15-SM-5CQ5D
prad_p1000:PROS01448-DFCI.10-448.P42-SM-5CQ55
prad_p1000:PROS01448-6115219-SM-67ERS
prad_p1000:PROS01448-6115224-SM-67ERT
prad_p1000:PROS01448-6115227-SM-67ERU
prad_p1000:PROS01448-6115233-SM-67ERW
prad_p1000:PROS10448-SUTC.01115081-SM-4JC6A
prad_p1000:PROS10448-1115156-SM-5EEBN
prad_p1000:PROS10448-1115157-SM-5EEBO
prad_p1000:PROS11496-6115236-SM-6CNPW
prad_p1000:PROS11496-6115288-SM-6CNQ1
prad_p1000:PROS11496-6115317-SM-6CNQ2
prad_p1000:PROS11496-6115323-SM-6CNQ8
prad_p1000:PROS12319B-SU2C-06115117-SM-4W2NC
prad_p1000:SC_9011
prad_p1000:SC_9024
prad_p1000:SC_9035
prad_p1000:SC_9046
prad_p1000:SC_9047
prad_p1000:SC_9059
prad_p1000:SC_9063
prad_p1000:SC_9086
prad_p1000:SC_9092
prad_p1000:SC_9105
prad_p1000:SC_9109
prad_p1000:SC_9129
prad_p1000:SC_9137
prad_p1000:SC_9153
prad_p1000:SC_9158
prad_p1000:SC_9162
prad_p1000:SC_9173
prad_p1000:TCGA-2A-AAYU
prad_p1000:TCGA-CH-5741
prad_p1000:TCGA-G9-6332
prad_p1000:TCGA-HC-A9TE
prad_p1000:TCGA-HC-7213
prad_p1000:TCGA-HC-7742
prad_p1000:TCGA-J4-AATZ
prad_p1000:TCGA-KK-A7B3
prad_p1000:TCGA-KK-A8IA
prad_p1000:TCGA-KK-A8IH
prad_p1000:TCGA-KK-A8II
prad_p1000:TCGA-KK-A8IM
prad_p1000:TCGA-XQ-A8TA
prad_p1000:TCGA-XQ-A8TB
prad_p1000:TCGA-YL-A8HL
prad_p1000:TCGA-YL-A8SA
prad_p1000:TCGA-YL-A8SC
prad_p1000:TCGA-YL-A8SL
prad_p1000:TCGA-YL-A9WL
prad_p1000:TCGA-ZG-A9LM
prad_p1000:TP_2001
prad_p1000:TP_2032
prad_p1000:TP_2034
prad_p1000:TP_2061
prad_p1000:TP_2069
prad_p1000:TP_2078
prad_p1000:99-064O_LN
prad_p1000:99-090A2_LIVER
prad_p1000:10361
prad_p1000:10362
prad_p1000:21017
prad_p1000:24854
prad_cdk12_mskcc_2020:P-0003684
prad_cdk12_mskcc_2020:P-0017543
prad_cdk12_mskcc_2020:P-0002499
prad_cdk12_mskcc_2020:P-0002898
prad_cdk12_mskcc_2020:P-0005216
prad_cdk12_mskcc_2020:P-0005697
prad_cdk12_mskcc_2020:P-0005976
prad_cdk12_mskcc_2020:P-0009090
prad_cdk12_mskcc_2020:P-0012543
prad_cdk12_mskcc_2020:P-0013022
prad_cdk12_mskcc_2020:P-0017889
prad_cdk12_mskcc_2020:P-0019520
prad_cdk12_mskcc_2020:P-0019840
prad_cdk12_mskcc_2020:P-0020218
prad_cdk12_mskcc_2020:P-0021854
prad_cdk12_mskcc_2020:P-0022383
prad_cdk12_mskcc_2020:P-0023345
prad_cdk12_mskcc_2020:P-0031720
prad_cdk12_mskcc_2020:P-0032154
prad_cdk12_mskcc_2020:P-0032868
prad_cdk12_mskcc_2020:P-0018659
prad_cdk12_mskcc_2020:P-0021310
prad_cdk12_mskcc_2020:P-0011465
prad_cdk12_mskcc_2020:P-0030717
prad_cdk12_mskcc_2020:P-0009656
prad_cdk12_mskcc_2020:P-0026447
prad_cdk12_mskcc_2020:P-0001426
prad_cdk12_mskcc_2020:P-0026409
prad_cdk12_mskcc_2020:P-0003945
prad_cdk12_mskcc_2020:P-0031712
prad_cdk12_mskcc_2020:P-0000318
prad_cdk12_mskcc_2020:P-0000610
prad_cdk12_mskcc_2020:P-0000683
prad_cdk12_mskcc_2020:P-0000828
prad_cdk12_mskcc_2020:P-0000935
prad_cdk12_mskcc_2020:P-0000966
prad_cdk12_mskcc_2020:P-0001108
prad_cdk12_mskcc_2020:P-0001141
prad_cdk12_mskcc_2020:P-0001274
prad_cdk12_mskcc_2020:P-0001446
prad_cdk12_mskcc_2020:P-0001698
prad_cdk12_mskcc_2020:P-0001768
prad_cdk12_mskcc_2020:P-0002149
prad_cdk12_mskcc_2020:P-0002364
prad_cdk12_mskcc_2020:P-0002382
prad_cdk12_mskcc_2020:P-0002739
prad_cdk12_mskcc_2020:P-0002901
prad_cdk12_mskcc_2020:P-0002961
prad_cdk12_mskcc_2020:P-0002974
prad_cdk12_mskcc_2020:P-0002990
prad_cdk12_mskcc_2020:P-0002999
prad_cdk12_mskcc_2020:P-0003033
prad_cdk12_mskcc_2020:P-0003040
prad_cdk12_mskcc_2020:P-0003226
prad_cdk12_mskcc_2020:P-0003419
prad_cdk12_mskcc_2020:P-0003468
prad_cdk12_mskcc_2020:P-0003535
prad_cdk12_mskcc_2020:P-0003541
prad_cdk12_mskcc_2020:P-0003626
prad_cdk12_mskcc_2020:P-0004312
prad_cdk12_mskcc_2020:P-0004482
prad_cdk12_mskcc_2020:P-0004826
prad_cdk12_mskcc_2020:P-0005045
prad_cdk12_mskcc_2020:P-0005436
prad_cdk12_mskcc_2020:P-0005454
prad_cdk12_mskcc_2020:P-0005596
prad_cdk12_mskcc_2020:P-0005768
prad_cdk12_mskcc_2020:P-0005806
prad_cdk12_mskcc_2020:P-0006389
prad_cdk12_mskcc_2020:P-0006635
prad_cdk12_mskcc_2020:P-0006670
prad_cdk12_mskcc_2020:P-0006767
prad_cdk12_mskcc_2020:P-0006856
prad_cdk12_mskcc_2020:P-0006994
prad_cdk12_mskcc_2020:P-0007043
prad_cdk12_mskcc_2020:P-0007098
prad_cdk12_mskcc_2020:P-0007219
prad_cdk12_mskcc_2020:P-0007307
prad_cdk12_mskcc_2020:P-0007547
prad_cdk12_mskcc_2020:P-0007749
prad_cdk12_mskcc_2020:P-0008074
prad_cdk12_mskcc_2020:P-0008206
prad_cdk12_mskcc_2020:P-0008452
prad_cdk12_mskcc_2020:P-0008525
prad_cdk12_mskcc_2020:P-0008852
prad_cdk12_mskcc_2020:P-0008960
prad_cdk12_mskcc_2020:P-0008966
prad_cdk12_mskcc_2020:P-0009374
prad_cdk12_mskcc_2020:P-0009543
prad_cdk12_mskcc_2020:P-0009654
prad_cdk12_mskcc_2020:P-0009687
prad_cdk12_mskcc_2020:P-0010015
prad_cdk12_mskcc_2020:P-0010178
prad_cdk12_mskcc_2020:P-0010657
prad_cdk12_mskcc_2020:P-0011090
prad_cdk12_mskcc_2020:P-0011096
prad_cdk12_mskcc_2020:P-0011377
prad_cdk12_mskcc_2020:P-0011483
prad_cdk12_mskcc_2020:P-0012030
prad_cdk12_mskcc_2020:P-0012048
prad_cdk12_mskcc_2020:P-0012104
prad_cdk12_mskcc_2020:P-0012141
prad_cdk12_mskcc_2020:P-0012197
prad_cdk12_mskcc_2020:P-0012368
prad_cdk12_mskcc_2020:P-0012914
prad_cdk12_mskcc_2020:P-0013032
prad_cdk12_mskcc_2020:P-0013038
prad_cdk12_mskcc_2020:P-0013358
prad_cdk12_mskcc_2020:P-0013457
prad_cdk12_mskcc_2020:P-0013465
prad_cdk12_mskcc_2020:P-0013674
prad_cdk12_mskcc_2020:P-0013729
prad_cdk12_mskcc_2020:P-0013732
prad_cdk12_mskcc_2020:P-0013810
prad_cdk12_mskcc_2020:P-0013936
prad_cdk12_mskcc_2020:P-0014004
prad_cdk12_mskcc_2020:P-0014076
prad_cdk12_mskcc_2020:P-0014254
prad_cdk12_mskcc_2020:P-0014333
prad_cdk12_mskcc_2020:P-0014438
prad_cdk12_mskcc_2020:P-0014523
prad_cdk12_mskcc_2020:P-0014629
prad_cdk12_mskcc_2020:P-0014686
prad_cdk12_mskcc_2020:P-0014841
prad_cdk12_mskcc_2020:P-0015209
prad_cdk12_mskcc_2020:P-0015628
prad_cdk12_mskcc_2020:P-0015744
prad_cdk12_mskcc_2020:P-0015837
prad_cdk12_mskcc_2020:P-0015925
prad_cdk12_mskcc_2020:P-0015960
prad_cdk12_mskcc_2020:P-0016134
prad_cdk12_mskcc_2020:P-0016325
prad_cdk12_mskcc_2020:P-0016386
prad_cdk12_mskcc_2020:P-0016396
prad_cdk12_mskcc_2020:P-0016405
prad_cdk12_mskcc_2020:P-0016548
prad_cdk12_mskcc_2020:P-0016733
prad_cdk12_mskcc_2020:P-0016812
prad_cdk12_mskcc_2020:P-0016961
prad_cdk12_mskcc_2020:P-0017232
prad_cdk12_mskcc_2020:P-0017262
prad_cdk12_mskcc_2020:P-0017491
prad_cdk12_mskcc_2020:P-0017605
prad_cdk12_mskcc_2020:P-0017730
prad_cdk12_mskcc_2020:P-0017754
prad_cdk12_mskcc_2020:P-0017844
prad_cdk12_mskcc_2020:P-0017882
prad_cdk12_mskcc_2020:P-0017886
prad_cdk12_mskcc_2020:P-0018235
prad_cdk12_mskcc_2020:P-0018315
prad_cdk12_mskcc_2020:P-0018605
prad_cdk12_mskcc_2020:P-0018627
prad_cdk12_mskcc_2020:P-0018713
prad_cdk12_mskcc_2020:P-0018791
prad_cdk12_mskcc_2020:P-0019030
prad_cdk12_mskcc_2020:P-0019420
prad_cdk12_mskcc_2020:P-0019830
prad_cdk12_mskcc_2020:P-0019930
prad_cdk12_mskcc_2020:P-0020111
prad_cdk12_mskcc_2020:P-0020482
prad_cdk12_mskcc_2020:P-0020792
prad_cdk12_mskcc_2020:P-0020812
prad_cdk12_mskcc_2020:P-0020984
prad_cdk12_mskcc_2020:P-0021023
prad_cdk12_mskcc_2020:P-0021104
prad_cdk12_mskcc_2020:P-0021342
prad_cdk12_mskcc_2020:P-0021626
prad_cdk12_mskcc_2020:P-0021723
prad_cdk12_mskcc_2020:P-0021728
prad_cdk12_mskcc_2020:P-0021792
prad_cdk12_mskcc_2020:P-0022197
prad_cdk12_mskcc_2020:P-0022249
prad_cdk12_mskcc_2020:P-0022430
prad_cdk12_mskcc_2020:P-0022437
prad_cdk12_mskcc_2020:P-0022439
prad_cdk12_mskcc_2020:P-0022470
prad_cdk12_mskcc_2020:P-0022611
prad_cdk12_mskcc_2020:P-0022700
prad_cdk12_mskcc_2020:P-0022782
prad_cdk12_mskcc_2020:P-0023030
prad_cdk12_mskcc_2020:P-0023249
prad_cdk12_mskcc_2020:P-0023276
prad_cdk12_mskcc_2020:P-0023318
prad_cdk12_mskcc_2020:P-0023546
prad_cdk12_mskcc_2020:P-0023666
prad_cdk12_mskcc_2020:P-0023958
prad_cdk12_mskcc_2020:P-0024220
prad_cdk12_mskcc_2020:P-0024538
prad_cdk12_mskcc_2020:P-0024598
prad_cdk12_mskcc_2020:P-0024648
prad_cdk12_mskcc_2020:P-0024913
prad_cdk12_mskcc_2020:P-0025044
prad_cdk12_mskcc_2020:P-0025138
prad_cdk12_mskcc_2020:P-0025139
prad_cdk12_mskcc_2020:P-0025150
prad_cdk12_mskcc_2020:P-0025332
prad_cdk12_mskcc_2020:P-0025494
prad_cdk12_mskcc_2020:P-0025562
prad_cdk12_mskcc_2020:P-0025571
prad_cdk12_mskcc_2020:P-0026072
prad_cdk12_mskcc_2020:P-0026152
prad_cdk12_mskcc_2020:P-0026153
prad_cdk12_mskcc_2020:P-0026162
prad_cdk12_mskcc_2020:P-0026202
prad_cdk12_mskcc_2020:P-0026228
prad_cdk12_mskcc_2020:P-0026369
prad_cdk12_mskcc_2020:P-0026395
prad_cdk12_mskcc_2020:P-0026673
prad_cdk12_mskcc_2020:P-0026774
prad_cdk12_mskcc_2020:P-0026808
prad_cdk12_mskcc_2020:P-0027210
prad_cdk12_mskcc_2020:P-0027293
prad_cdk12_mskcc_2020:P-0027526
prad_cdk12_mskcc_2020:P-0027722
prad_cdk12_mskcc_2020:P-0027823
prad_cdk12_mskcc_2020:P-0028090
prad_cdk12_mskcc_2020:P-0028167
prad_cdk12_mskcc_2020:P-0029339
prad_cdk12_mskcc_2020:P-0029523
prad_cdk12_mskcc_2020:P-0029796
prad_cdk12_mskcc_2020:P-0030521
prad_cdk12_mskcc_2020:P-0030801
prad_cdk12_mskcc_2020:P-0031062
prad_cdk12_mskcc_2020:P-0031991
prad_cdk12_mskcc_2020:P-0032194
prad_cdk12_mskcc_2020:P-0032651
prad_cdk12_mskcc_2020:P-0032799
prad_cdk12_mskcc_2020:P-0033105
prad_cdk12_mskcc_2020:P-0033226
prad_cdk12_mskcc_2020:P-0038369
prad_pik3r1_msk_2021:P-0017543
prad_pik3r1_msk_2021:P-0035270
prad_pik3r1_msk_2021:P-0005697
prad_pik3r1_msk_2021:P-0005976
prad_pik3r1_msk_2021:P-0012543
prad_pik3r1_msk_2021:P-0019520
prad_pik3r1_msk_2021:P-0019840
prad_pik3r1_msk_2021:P-0020218
prad_pik3r1_msk_2021:P-0023345
prad_pik3r1_msk_2021:P-0030202
prad_pik3r1_msk_2021:P-0031720
prad_pik3r1_msk_2021:P-0032868
prad_pik3r1_msk_2021:P-0037021
prad_pik3r1_msk_2021:P-0049144
prad_pik3r1_msk_2021:P-0021310
prad_pik3r1_msk_2021:P-0011465
prad_pik3r1_msk_2021:P-0030717
prad_pik3r1_msk_2021:P-0034645
prad_pik3r1_msk_2021:P-0049287
prad_pik3r1_msk_2021:P-0049590
prad_pik3r1_msk_2021:P-0004892
prad_pik3r1_msk_2021:P-0009656
prad_pik3r1_msk_2021:P-0025222
prad_pik3r1_msk_2021:P-0026447
prad_pik3r1_msk_2021:P-0048653
prad_pik3r1_msk_2021:P-0001426
prad_pik3r1_msk_2021:P-0031712
prad_pik3r1_msk_2021:P-0000318
prad_pik3r1_msk_2021:P-0000373
prad_pik3r1_msk_2021:P-0000610
prad_pik3r1_msk_2021:P-0000935
prad_pik3r1_msk_2021:P-0001108
prad_pik3r1_msk_2021:P-0001141
prad_pik3r1_msk_2021:P-0001274
prad_pik3r1_msk_2021:P-0001698
prad_pik3r1_msk_2021:P-0002149
prad_pik3r1_msk_2021:P-0002364
prad_pik3r1_msk_2021:P-0002901
prad_pik3r1_msk_2021:P-0002974
prad_pik3r1_msk_2021:P-0002990
prad_pik3r1_msk_2021:P-0002999
prad_pik3r1_msk_2021:P-0003033
prad_pik3r1_msk_2021:P-0003040
prad_pik3r1_msk_2021:P-0003226
prad_pik3r1_msk_2021:P-0003419
prad_pik3r1_msk_2021:P-0003468
prad_pik3r1_msk_2021:P-0004312
prad_pik3r1_msk_2021:P-0004482
prad_pik3r1_msk_2021:P-0004826
prad_pik3r1_msk_2021:P-0005454
prad_pik3r1_msk_2021:P-0005596
prad_pik3r1_msk_2021:P-0005768
prad_pik3r1_msk_2021:P-0005787
prad_pik3r1_msk_2021:P-0005806
prad_pik3r1_msk_2021:P-0006635
prad_pik3r1_msk_2021:P-0006670
prad_pik3r1_msk_2021:P-0006767
prad_pik3r1_msk_2021:P-0006856
prad_pik3r1_msk_2021:P-0006994
prad_pik3r1_msk_2021:P-0007043
prad_pik3r1_msk_2021:P-0007749
prad_pik3r1_msk_2021:P-0008074
prad_pik3r1_msk_2021:P-0008206
prad_pik3r1_msk_2021:P-0008852
prad_pik3r1_msk_2021:P-0008966
prad_pik3r1_msk_2021:P-0009374
prad_pik3r1_msk_2021:P-0009543
prad_pik3r1_msk_2021:P-0009640
prad_pik3r1_msk_2021:P-0009654
prad_pik3r1_msk_2021:P-0010015
prad_pik3r1_msk_2021:P-0010657
prad_pik3r1_msk_2021:P-0011090
prad_pik3r1_msk_2021:P-0011096
prad_pik3r1_msk_2021:P-0011377
prad_pik3r1_msk_2021:P-0011483
prad_pik3r1_msk_2021:P-0012030
prad_pik3r1_msk_2021:P-0012048
prad_pik3r1_msk_2021:P-0012914
prad_pik3r1_msk_2021:P-0013358
prad_pik3r1_msk_2021:P-0013457
prad_pik3r1_msk_2021:P-0013465
prad_pik3r1_msk_2021:P-0013674
prad_pik3r1_msk_2021:P-0013732
prad_pik3r1_msk_2021:P-0013936
prad_pik3r1_msk_2021:P-0014004
prad_pik3r1_msk_2021:P-0014076
prad_pik3r1_msk_2021:P-0014254
prad_pik3r1_msk_2021:P-0014523
prad_pik3r1_msk_2021:P-0014629
prad_pik3r1_msk_2021:P-0014841
prad_pik3r1_msk_2021:P-0015209
prad_pik3r1_msk_2021:P-0015744
prad_pik3r1_msk_2021:P-0015837
prad_pik3r1_msk_2021:P-0015960
prad_pik3r1_msk_2021:P-0016134
prad_pik3r1_msk_2021:P-0016396
prad_pik3r1_msk_2021:P-0016405
prad_pik3r1_msk_2021:P-0016548
prad_pik3r1_msk_2021:P-0016812
prad_pik3r1_msk_2021:P-0016961
prad_pik3r1_msk_2021:P-0017232
prad_pik3r1_msk_2021:P-0017262
prad_pik3r1_msk_2021:P-0017491
prad_pik3r1_msk_2021:P-0017605
prad_pik3r1_msk_2021:P-0017730
prad_pik3r1_msk_2021:P-0017844
prad_pik3r1_msk_2021:P-0018605
prad_pik3r1_msk_2021:P-0018627
prad_pik3r1_msk_2021:P-0018713
prad_pik3r1_msk_2021:P-0018791
prad_pik3r1_msk_2021:P-0019030
prad_pik3r1_msk_2021:P-0019830
prad_pik3r1_msk_2021:P-0019930
prad_pik3r1_msk_2021:P-0020111
prad_pik3r1_msk_2021:P-0020482
prad_pik3r1_msk_2021:P-0020792
prad_pik3r1_msk_2021:P-0020812
prad_pik3r1_msk_2021:P-0020984
prad_pik3r1_msk_2021:P-0021023
prad_pik3r1_msk_2021:P-0021104
prad_pik3r1_msk_2021:P-0021342
prad_pik3r1_msk_2021:P-0021626
prad_pik3r1_msk_2021:P-0021673
prad_pik3r1_msk_2021:P-0021728
prad_pik3r1_msk_2021:P-0021792
prad_pik3r1_msk_2021:P-0022197
prad_pik3r1_msk_2021:P-0022430
prad_pik3r1_msk_2021:P-0022439
prad_pik3r1_msk_2021:P-0022611
prad_pik3r1_msk_2021:P-0022700
prad_pik3r1_msk_2021:P-0022782
prad_pik3r1_msk_2021:P-0023030
prad_pik3r1_msk_2021:P-0023318
prad_pik3r1_msk_2021:P-0023546
prad_pik3r1_msk_2021:P-0023666
prad_pik3r1_msk_2021:P-0023958
prad_pik3r1_msk_2021:P-0024220
prad_pik3r1_msk_2021:P-0024459
prad_pik3r1_msk_2021:P-0024538
prad_pik3r1_msk_2021:P-0024598
prad_pik3r1_msk_2021:P-0024913
prad_pik3r1_msk_2021:P-0025044
prad_pik3r1_msk_2021:P-0025139
prad_pik3r1_msk_2021:P-0025150
prad_pik3r1_msk_2021:P-0025494
prad_pik3r1_msk_2021:P-0025571
prad_pik3r1_msk_2021:P-0026152
prad_pik3r1_msk_2021:P-0026153
prad_pik3r1_msk_2021:P-0026162
prad_pik3r1_msk_2021:P-0026202
prad_pik3r1_msk_2021:P-0026228
prad_pik3r1_msk_2021:P-0026238
prad_pik3r1_msk_2021:P-0026369
prad_pik3r1_msk_2021:P-0026673
prad_pik3r1_msk_2021:P-0026774
prad_pik3r1_msk_2021:P-0026808
prad_pik3r1_msk_2021:P-0027210
prad_pik3r1_msk_2021:P-0027526
prad_pik3r1_msk_2021:P-0027722
prad_pik3r1_msk_2021:P-0027823
prad_pik3r1_msk_2021:P-0028090
prad_pik3r1_msk_2021:P-0028167
prad_pik3r1_msk_2021:P-0028569
prad_pik3r1_msk_2021:P-0029523
prad_pik3r1_msk_2021:P-0029796
prad_pik3r1_msk_2021:P-0029939
prad_pik3r1_msk_2021:P-0029948
prad_pik3r1_msk_2021:P-0030521
prad_pik3r1_msk_2021:P-0031062
prad_pik3r1_msk_2021:P-0031991
prad_pik3r1_msk_2021:P-0032027
prad_pik3r1_msk_2021:P-0032194
prad_pik3r1_msk_2021:P-0033105
prad_pik3r1_msk_2021:P-0033226
prad_pik3r1_msk_2021:P-0033660
prad_pik3r1_msk_2021:P-0034327
prad_pik3r1_msk_2021:P-0034431
prad_pik3r1_msk_2021:P-0035284
prad_pik3r1_msk_2021:P-0036007
prad_pik3r1_msk_2021:P-0036349
prad_pik3r1_msk_2021:P-0036351
prad_pik3r1_msk_2021:P-0037029
prad_pik3r1_msk_2021:P-0037664
prad_pik3r1_msk_2021:P-0037691
prad_pik3r1_msk_2021:P-0037701
prad_pik3r1_msk_2021:P-0038198
prad_pik3r1_msk_2021:P-0038369
prad_pik3r1_msk_2021:P-0039006
prad_pik3r1_msk_2021:P-0039234
prad_pik3r1_msk_2021:P-0040786
prad_pik3r1_msk_2021:P-0041034
prad_pik3r1_msk_2021:P-0041103
prad_pik3r1_msk_2021:P-0041549
prad_pik3r1_msk_2021:P-0041944
prad_pik3r1_msk_2021:P-0041945
prad_pik3r1_msk_2021:P-0042252
prad_pik3r1_msk_2021:P-0042583
prad_pik3r1_msk_2021:P-0042663
prad_pik3r1_msk_2021:P-0043029
prad_pik3r1_msk_2021:P-0043158
prad_pik3r1_msk_2021:P-0043325
prad_pik3r1_msk_2021:P-0043489
prad_pik3r1_msk_2021:P-0043708
prad_pik3r1_msk_2021:P-0044288
prad_pik3r1_msk_2021:P-0045146
prad_pik3r1_msk_2021:P-0045289
prad_pik3r1_msk_2021:P-0045358
prad_pik3r1_msk_2021:P-0045856
prad_pik3r1_msk_2021:P-0046881
prad_pik3r1_msk_2021:P-0048357
prad_pik3r1_msk_2021:P-0048370
prad_pik3r1_msk_2021:P-0048510
prad_pik3r1_msk_2021:P-0049886
prad_pik3r1_msk_2021:P-0050123
prad_pik3r1_msk_2021:P-0050289
prad_pik3r1_msk_2021:P-0050426
prad_pik3r1_msk_2021:P-0050552
prad_pik3r1_msk_2021:P-0050644
prad_pik3r1_msk_2021:P-0051311
prad_pik3r1_msk_2021:P-0051484
prad_pik3r1_msk_2021:P-0052970
prad_pik3r1_msk_2021:P-0053240
prad_pik3r1_msk_2021:P-0053926
prad_pik3r1_msk_2021:P-0054154
prad_pik3r1_msk_2021:P-0054306
prad_pik3r1_msk_2021:P-0054506
prad_pik3r1_msk_2021:P-0054521
prad_pik3r1_msk_2021:P-0057103
prad_su2c_2019:5115186
prad_su2c_2019:9115418
prad_su2c_2019:6115285
prad_su2c_2019:6115296
prad_su2c_2019:6115396
prad_su2c_2019:5115057
prad_su2c_2019:97115005
prad_su2c_2019:5115196
prad_su2c_2019:97115365
prad_su2c_2019:5115058
prad_su2c_2019:9115107
prad_su2c_2019:6115247
prad_su2c_2019:9115035
prad_su2c_2019:5115608
prad_su2c_2019:6115322
prad_su2c_2019:5115033
prad_su2c_2019:9115052
prad_su2c_2019:13115262
prad_su2c_2019:5115411
prad_su2c_2019:9115522
prad_su2c_2019:9115102
prad_su2c_2019:96115645
prad_su2c_2019:97115563
prad_su2c_2019:5115546
prad_su2c_2019:5115024
prad_su2c_2019:96115639
prad_su2c_2019:96115494
prad_su2c_2019:5115027
prad_su2c_2019:6115399
prad_su2c_2019:6115014
prad_su2c_2019:96115623
prad_su2c_2019:1115372
prad_su2c_2019:9115063
prad_su2c_2019:97115358
prad_su2c_2019:5115408
prad_su2c_2019:9115060
prad_su2c_2019:5115291
prad_su2c_2019:9115517
prad_su2c_2019:97115560
prad_su2c_2019:9115339
prad_su2c_2019:5115128
prad_su2c_2019:9115064
prad_su2c_2019:1115362
prad_su2c_2019:9115055
prad_su2c_2019:5115410
prad_su2c_2019:5115613
prad_su2c_2019:9115580
prad_su2c_2019:5115152
prad_su2c_2019:5115158
prad_su2c_2019:5115612
prad_su2c_2019:9115568
prad_su2c_2019:5115648
prad_su2c_2019:5115651
prad_su2c_2019:5115199
prad_su2c_2019:5115255
prad_su2c_2019:5115259
prad_su2c_2019:5115260
prad_su2c_2019:5115405
prad_su2c_2019:9115041
prad_su2c_2019:9115048
prad_su2c_2019:9115104
prad_su2c_2019:9115175
prad_su2c_2019:9115340
prad_su2c_2019:9115524
prad_su2c_2019:97115003
prad_su2c_2019:97115125
prad_su2c_2019:97115131
prad_su2c_2019:97115151
prad_su2c_2019:97115337
prad_su2c_2019:96115622
prad_su2c_2019:96115629
prad_su2c_2019:1115091
prad_su2c_2019:1115156
prad_su2c_2019:1115157
prad_su2c_2019:1115183
prad_su2c_2019:1115305
prad_su2c_2019:1115309
prad_su2c_2019:1115312
prad_su2c_2019:1115525
prad_su2c_2019:6115117
prad_su2c_2019:6115219
prad_su2c_2019:6115227
prad_su2c_2019:6115233
prad_su2c_2019:6115234
prad_su2c_2019:6115236
prad_su2c_2019:6115288
prad_su2c_2019:6115317
prad_su2c_2019:6115323
prad_su2c_2019:6115390
prad_su2c_2019:6115392
prad_su2c_2019:6115395
prad_su2c_2019:6115593
prad_su2c_2019:6115596
prad_su2c_2019:6115597
prad_su2c_2019:6115600
prad_su2c_2019:6115601
prad_su2c_2019:6115604
prad_su2c_2019:9115047
prad_su2c_2019:9115341
prad_su2c_2019:9115551
prad_su2c_2019:96115141
prad_su2c_2019:96115145
prad_su2c_2019:96115208
prad_su2c_2019:96115482
prad_su2c_2019:96115509
prad_su2c_2019:96115643
prad_mcspc_mskcc_2020:P-0017543
prad_mcspc_mskcc_2020:P-0020812
prad_mcspc_mskcc_2020:P-0002499
prad_mcspc_mskcc_2020:P-0002898
prad_mcspc_mskcc_2020:P-0003061
prad_mcspc_mskcc_2020:P-0020218
prad_mcspc_mskcc_2020:P-0022383
prad_mcspc_mskcc_2020:P-0031720
prad_mcspc_mskcc_2020:P-0029164
prad_mcspc_mskcc_2020:P-0011465
prad_mcspc_mskcc_2020:P-0002334
prad_mcspc_mskcc_2020:P-0009656
prad_mcspc_mskcc_2020:P-0025222
prad_mcspc_mskcc_2020:P-0001426
prad_mcspc_mskcc_2020:P-0026409
prad_mcspc_mskcc_2020:P-0000683
prad_mcspc_mskcc_2020:P-0000888
prad_mcspc_mskcc_2020:P-0001141
prad_mcspc_mskcc_2020:P-0002123
prad_mcspc_mskcc_2020:P-0002974
prad_mcspc_mskcc_2020:P-0003033
prad_mcspc_mskcc_2020:P-0005045
prad_mcspc_mskcc_2020:P-0005436
prad_mcspc_mskcc_2020:P-0005454
prad_mcspc_mskcc_2020:P-0007043
prad_mcspc_mskcc_2020:P-0007547
prad_mcspc_mskcc_2020:P-0007749
prad_mcspc_mskcc_2020:P-0009640
prad_mcspc_mskcc_2020:P-0009687
prad_mcspc_mskcc_2020:P-0010178
prad_mcspc_mskcc_2020:P-0011377
prad_mcspc_mskcc_2020:P-0011483
prad_mcspc_mskcc_2020:P-0012030
prad_mcspc_mskcc_2020:P-0012048
prad_mcspc_mskcc_2020:P-0012914
prad_mcspc_mskcc_2020:P-0013674
prad_mcspc_mskcc_2020:P-0013729
prad_mcspc_mskcc_2020:P-0014004
prad_mcspc_mskcc_2020:P-0014076
prad_mcspc_mskcc_2020:P-0014254
prad_mcspc_mskcc_2020:P-0014438
prad_mcspc_mskcc_2020:P-0014629
prad_mcspc_mskcc_2020:P-0014686
prad_mcspc_mskcc_2020:P-0015209
prad_mcspc_mskcc_2020:P-0016396
prad_mcspc_mskcc_2020:P-0016405
prad_mcspc_mskcc_2020:P-0016733
prad_mcspc_mskcc_2020:P-0019030
prad_mcspc_mskcc_2020:P-0020792
prad_mcspc_mskcc_2020:P-0021728
prad_mcspc_mskcc_2020:P-0022439
prad_mcspc_mskcc_2020:P-0022700
prad_mcspc_mskcc_2020:P-0023249
prad_mcspc_mskcc_2020:P-0023276
prad_mcspc_mskcc_2020:P-0025044
prad_mcspc_mskcc_2020:P-0025138
prad_mcspc_mskcc_2020:P-0025150
prad_mcspc_mskcc_2020:P-0025494
prad_mcspc_mskcc_2020:P-0026673
prad_mcspc_mskcc_2020:P-0026774
prad_mcspc_mskcc_2020:P-0026808
prad_mcspc_mskcc_2020:P-0027823
prad_mcspc_mskcc_2020:P-0028167
prad_mcspc_mskcc_2020:P-0029523
prad_mcspc_mskcc_2020:P-0030801
prad_mcspc_mskcc_2020:P-0031062
prad_mcspc_mskcc_2020:P-0032799
prad_mcspc_mskcc_2020:P-0033105
prad_mcspc_mskcc_2020:P-0033226
prad_mskcc:PCA0015
prad_mskcc:PCA0028
prad_mskcc:PCA0206
prad_mskcc:PCA0018
prad_mskcc:PCA0210
prad_mskcc:PCA0002
prad_mskcc:PCA0027
prad_mskcc:PCA0082
prad_mskcc:PCA0194
prad_mskcc:PCA0204
prad_mskcc:PCA0108
prad_mskcc:PCA0208
prad_mskcc:PCA0128
prad_mskcc:PCA0083
prad_mskcc:PCA0066
prad_mskcc:PCA0126
prad_mskcc:PCA0020
prad_mskcc:PCA0133
prad_mskcc:PCA0114
prad_mskcc:PCA0184
prad_mskcc:PCA0171
prad_mskcc:PCA0205
prad_mskcc:PCA0049
prad_mskcc:PCA0183
prad_mskcc:PCA0185
prad_mskcc:PCA0218
prad_mskcc:PCA0155
prad_mskcc:PCA0005
prad_mskcc:PCA0011
prad_mskcc:PCA0029
prad_mskcc:PCA0058
prad_mskcc:PCA0064
prad_mskcc:PCA0068
prad_mskcc:PCA0080
prad_mskcc:PCA0125
prad_mskcc:PCA0161
prad_mskcc:PCA0172
prad_mskcc:PCA0042
prad_mskcc:PCA0217
prostate_dkfz_2018:ICGC_PCA007
prostate_dkfz_2018:ICGC_PCA008
prostate_dkfz_2018:ICGC_PCA011
prostate_dkfz_2018:ICGC_PCA158
prostate_dkfz_2018:ICGC_PCA168
prad_mskcc:PCA0160
prad_mskcc:PCA0013
prad_mskcc:PCA0208
prad_mskcc:PCA0128
prad_mskcc:PCA0180
prad_mskcc:PCA0215
prad_mskcc:PCA0194
prad_mskcc:PCA0189
prad_mskcc:PCA0092
prad_mskcc:PCA0054
prad_mskcc:PCA0173
prad_mskcc:PCA0207
prad_mskcc:PCA0184
prad_mskcc:PCA0171
prad_mskcc:PCA0005
prad_mskcc:PCA0021
prad_mskcc:PCA0087
prad_mskcc:PCA0002
prad_mskcc:PCA0020
prad_mskcc:PCA0032
prad_mskcc:PCA0081

## Sheet: VCaP
1 alteration the same	2-4 alterations the same	5-6 alterations the same
prad_tcga:TCGA-J4-A83J	prad_tcga:TCGA-CH-5752	prad_tcga:TCGA-FC-A4JI
prad_tcga:TCGA-KC-A7F3	prad_tcga:TCGA-HC-7081	prad_tcga:TCGA-KK-A8ID
prad_tcga:TCGA-XK-AAJ3	prad_tcga:TCGA-EJ-5518	prad_tcga:TCGA-VP-A875
prad_tcga:TCGA-XK-AAJA	prad_tcga:TCGA-G9-7525	prad_tcga:TCGA-YJ-A8SW
prad_tcga:TCGA-HC-7817	prad_tcga:TCGA-EJ-5514	prad_su2c_2019:96115489
prad_tcga:TCGA-CH-5768	prad_tcga:TCGA-HC-7209	prad_su2c_2019:5115615
prad_tcga:TCGA-V1-A8WS	prad_tcga:TCGA-VN-A88K	prad_su2c_2019:9115062
prad_tcga:TCGA-YL-A9WJ	prad_tcga:TCGA-J9-A8CL	prad_su2c_2019:96115623
prad_tcga:TCGA-CH-5792	prad_tcga:TCGA-XQ-A8TA	prad_su2c_2019:9115050
prad_tcga:TCGA-KK-A8I9	prad_tcga:TCGA-QU-A6IN	prad_su2c_2019:9115418
prad_tcga:TCGA-ZG-A9L0	prad_tcga:TCGA-QU-A6IM	prad_su2c_2019:5115073
prad_tcga:TCGA-KK-A7B3	prad_tcga:TCGA-ZG-A9LS	prad_su2c_2019:9115049
prad_tcga:TCGA-CH-5748	prad_tcga:TCGA-HC-8265	prad_su2c_2019:9115065
prad_tcga:TCGA-EJ-A65F	prad_tcga:TCGA-KK-A6E4	prad_su2c_2019:5115327
prad_tcga:TCGA-EJ-8468	prad_tcga:TCGA-XK-AAK1	prad_su2c_2019:96115215
prad_tcga:TCGA-KK-A8I5	prad_tcga:TCGA-XJ-A9DX	prad_su2c_2019:5115613
prad_tcga:TCGA-KK-A8I6	prad_tcga:TCGA-CH-5788	prad_su2c_2019:5115026
prad_tcga:TCGA-V1-A9OX	prad_tcga:TCGA-KK-A8IA
prad_tcga:TCGA-VN-A88R	prad_tcga:TCGA-HC-7212
prad_tcga:TCGA-ZG-A9L6	prad_tcga:TCGA-G9-6377
prad_tcga:TCGA-V1-A9OQ	prad_tcga:TCGA-CH-5794
prad_tcga:TCGA-EJ-7786	prad_tcga:TCGA-ZG-A9L1
prad_tcga:TCGA-2A-A8W1	prad_tcga:TCGA-HC-7747
prad_tcga:TCGA-CH-5790	prad_tcga:TCGA-EJ-A8FS
prad_tcga:TCGA-HC-7211	prad_tcga:TCGA-KK-A8IL
prad_tcga:TCGA-CH-5741	prad_tcga:TCGA-EJ-7783
prad_tcga:TCGA-YL-A9WX	prad_tcga:TCGA-WW-A8ZI
prad_tcga:TCGA-QU-A6IL	prad_tcga:TCGA-CH-5751
prad_tcga:TCGA-J4-A67N	prad_tcga:TCGA-ZG-A9L5
prad_tcga:TCGA-KK-A7AW	prad_tcga:TCGA-J9-A8CK
prad_tcga:TCGA-KK-A8IK	prad_tcga:TCGA-J4-A67L
prad_tcga:TCGA-YL-A8HL	prad_tcga:TCGA-EJ-5521
prad_tcga:TCGA-V1-A9Z7	prad_tcga:TCGA-HC-8216
prad_tcga:TCGA-YL-A8SC	prad_tcga:TCGA-EJ-5525
prad_tcga:TCGA-HI-7171	prad_tcga:TCGA-EJ-7789
prad_tcga:TCGA-FC-A5OB	prad_tcga:TCGA-EJ-A65D
prad_tcga:TCGA-YL-A8SP	prad_tcga:TCGA-VP-A872
prad_tcga:TCGA-G9-6347	prad_tcga:TCGA-EJ-A46G
prad_tcga:TCGA-ZG-A9L9	prad_tcga:TCGA-ZG-A9LB
prad_tcga:TCGA-G9-7521	prad_tcga:TCGA-YL-A8HJ
prad_tcga:TCGA-ZG-A9KY	prad_tcga:TCGA-FC-A6HD
prad_tcga:TCGA-EJ-5519	prad_tcga:TCGA-2A-A8VT
prad_tcga:TCGA-KC-A7F5	prad_tcga:TCGA-CH-5761
prad_tcga:TCGA-XK-AAJP	prad_tcga:TCGA-EJ-5530
prad_tcga:TCGA-2A-AAYF	prad_tcga:TCGA-EJ-7785
prad_tcga:TCGA-G9-6366	prad_tcga:TCGA-HC-7748
prad_tcga:TCGA-HC-A6AN	prad_tcga:TCGA-EJ-8472
prad_tcga:TCGA-TP-A8TV	prad_tcga:TCGA-HC-7230
prad_tcga:TCGA-G9-6369	prad_tcga:TCGA-EJ-5495
prad_tcga:TCGA-EJ-A65G	prad_tcga:TCGA-EJ-7781
prad_tcga:TCGA-J4-AAU2	prad_tcga:TCGA-HC-A9TH
prad_tcga:TCGA-J4-A67S	prad_tcga:TCGA-HC-A48F
prad_tcga:TCGA-J9-A52D	prad_tcga:TCGA-VP-A876
prad_tcga:TCGA-VN-A88O	prad_tcga:TCGA-KK-A7B1
prad_tcga:TCGA-Y6-A8TL	prad_tcga:TCGA-HC-8264
prad_tcga:TCGA-4L-AA1F	prad_tcga:TCGA-QU-A6IO
prad_tcga:TCGA-V1-A9O5	prad_tcga:TCGA-YL-A8HM
prad_tcga:TCGA-CH-5767	prad_msk_stopsack_2021:P-0018581
prad_tcga:TCGA-KK-A7AQ	prad_msk_stopsack_2021:P-0025823
prad_tcga:TCGA-KC-A7F6	prad_msk_stopsack_2021:P-0050083
prad_tcga:TCGA-G9-6373	prad_msk_stopsack_2021:P-0013865
prad_tcga:TCGA-HC-8266	prad_msk_stopsack_2021:P-0036294
prad_tcga:TCGA-ZG-A9ND	prad_msk_stopsack_2021:P-0040262
prad_tcga:TCGA-CH-5771	prad_msk_stopsack_2021:P-0043853
prad_tcga:TCGA-HC-A8CY	prad_msk_stopsack_2021:P-0025550
prad_tcga:TCGA-HC-A6AO	prad_msk_stopsack_2021:P-0016921
prad_tcga:TCGA-HC-A6AQ	prad_msk_stopsack_2021:P-0019114
prad_tcga:TCGA-YL-A8S9	prad_msk_stopsack_2021:P-0020882
prad_tcga:TCGA-ZG-A9LY	prad_msk_stopsack_2021:P-0003758
prad_tcga:TCGA-HC-A632	prad_msk_stopsack_2021:P-0020495
prad_tcga:TCGA-YL-A9WY	prad_msk_stopsack_2021:P-0040084
prad_tcga:TCGA-VN-A88M	prad_msk_stopsack_2021:P-0044058
prad_tcga:TCGA-J9-A52E	prad_msk_stopsack_2021:P-0049590
prad_tcga:TCGA-XK-AAIW	prad_msk_stopsack_2021:P-0015058
prad_tcga:TCGA-KC-A4BL	prad_msk_stopsack_2021:P-0022420
prad_tcga:TCGA-XJ-A9DI	prad_msk_stopsack_2021:P-0019863
prad_tcga:TCGA-FC-A66V	prad_msk_stopsack_2021:P-0020833
prad_tcga:TCGA-J4-A67M	prad_msk_stopsack_2021:P-0010796
prad_tcga:TCGA-KK-A6E3	prad_msk_stopsack_2021:P-0038433
prad_tcga:TCGA-KK-A7B0	prad_msk_stopsack_2021:P-0001899
prad_tcga:TCGA-G9-6379	prad_msk_stopsack_2021:P-0017271
prad_tcga:TCGA-HC-A6HX	prad_msk_stopsack_2021:P-0024598
prad_tcga:TCGA-J4-A67O	prad_msk_stopsack_2021:P-0030812
prad_tcga:TCGA-J4-A67Q	prad_msk_stopsack_2021:P-0042436
prad_tcga:TCGA-HC-A6AP	prad_msk_stopsack_2021:P-0010315
prad_tcga:TCGA-HC-7744	prad_msk_stopsack_2021:P-0002984
prad_tcga:TCGA-CH-5765	prad_msk_stopsack_2021:P-0005454
prad_tcga:TCGA-HC-7736	prad_msk_stopsack_2021:P-0007182
prad_tcga:TCGA-VN-A88Q	prad_msk_stopsack_2021:P-0012031
prad_tcga:TCGA-YL-A8SR	prad_msk_stopsack_2021:P-0016876
prad_tcga:TCGA-CH-5753	prad_msk_stopsack_2021:P-0042663
prad_tcga:TCGA-EJ-7125	prad_msk_stopsack_2021:P-0020078
prad_tcga:TCGA-EJ-7327	prad_msk_stopsack_2021:P-0019624
prad_tcga:TCGA-EJ-7330	prad_msk_stopsack_2021:P-0022117
prad_tcga:TCGA-EJ-7331	prad_msk_stopsack_2021:P-0047833
prad_tcga:TCGA-EJ-7782	prad_msk_stopsack_2021:P-0009687
prad_tcga:TCGA-VP-A87K	prad_msk_stopsack_2021:P-0050289
prad_tcga:TCGA-CH-5737	prad_msk_stopsack_2021:P-0014004
prad_tcga:TCGA-HC-7213	prad_msk_stopsack_2021:P-0036176
prad_tcga:TCGA-V1-A9ZR	prad_msk_stopsack_2021:P-0008441
prad_tcga:TCGA-YL-A9WH	prad_msk_stopsack_2021:P-0026117
prad_tcga:TCGA-ZG-A9LM	prad_msk_stopsack_2021:P-0044288
prad_tcga:TCGA-EJ-7325	prad_msk_stopsack_2021:P-0013401
prad_tcga:TCGA-H9-A6BY	prad_msk_stopsack_2021:P-0044656
prad_tcga:TCGA-G9-6496	prad_msk_stopsack_2021:P-0035765
prad_tcga:TCGA-J4-A67K	prad_msk_stopsack_2021:P-0023741
prad_tcga:TCGA-KK-A6E7	prad_msk_stopsack_2021:P-0011096
prad_tcga:TCGA-EJ-A46F	prad_msk_stopsack_2021:P-0012197
prad_tcga:TCGA-M7-A722	prad_msk_stopsack_2021:P-0020984
prad_tcga:TCGA-KC-A4BN	prad_msk_stopsack_2021:P-0034030
prad_tcga:TCGA-KC-A7FD	prad_msk_stopsack_2021:P-0049886
prad_tcga:TCGA-J4-A67T	prad_msk_stopsack_2021:P-0049730
prad_tcga:TCGA-KK-A7AU	prad_msk_stopsack_2021:P-0038422
prad_tcga:TCGA-ZG-A9LZ	prad_msk_stopsack_2021:P-0041584
prad_tcga:TCGA-CH-5744	prad_msk_stopsack_2021:P-0009082
prad_tcga:TCGA-KK-A5A1	prad_msk_stopsack_2021:P-0037751
prad_tcga:TCGA-KK-A7AY	prad_msk_stopsack_2021:P-0022437
prad_tcga:TCGA-EJ-7784	prad_msk_stopsack_2021:P-0002516
prad_tcga:TCGA-J4-AATZ	prad_msk_stopsack_2021:P-0040519
prad_tcga:TCGA-J4-8198	prad_msk_stopsack_2021:P-0043708
prad_tcga:TCGA-KK-A8IJ	prad_msk_stopsack_2021:P-0017097
prad_tcga:TCGA-KK-A6E2	prad_msk_stopsack_2021:P-0023663
prad_tcga:TCGA-V1-A9OT	prad_msk_stopsack_2021:P-0044256
prad_tcga:TCGA-G9-6499	prad_msk_stopsack_2021:P-0032194
prad_tcga:TCGA-2A-A8VL	prad_msk_stopsack_2021:P-0003758
prad_tcga:TCGA-CH-5762	prad_msk_stopsack_2021:P-0001899
prad_tcga:TCGA-EJ-A65J	prad_msk_stopsack_2021:P-0002984
prad_tcga:TCGA-EJ-5524	prad_msk_stopsack_2021:P-0005454
prad_tcga:TCGA-EJ-5527	prad_msk_stopsack_2021:P-0007182
prad_tcga:TCGA-EJ-7318	prad_msk_stopsack_2021:P-0002516
prad_tcga:TCGA-EJ-7328	prad_msk_stopsack_2021:P-0008441
prad_tcga:TCGA-EJ-8474	prad_p1000:SC_9024
prad_tcga:TCGA-HC-7231	prad_p1000:P05-2212
prad_tcga:TCGA-V1-A8WN	prad_p1000:MO_1339
prad_tcga:TCGA-VN-A88L	prad_p1000:TCGA-EJ-5514
prad_tcga:TCGA-EJ-A7NH	prad_p1000:TCGA-G9-7521
prad_tcga:TCGA-EJ-5507	prad_p1000:TCGA-HC-8216
prad_tcga:TCGA-EJ-7315	prad_p1000:TCGA-KK-A8ID
prad_tcga:TCGA-G9-A9S0	prad_p1000:AAPC-STID0000021608-Tumor-SM-3RVWO
prad_tcga:TCGA-G9-A9S4	prad_p1000:AAPC-IP_LG-059-Tumor-SM-3NC6V
prad_tcga:TCGA-G9-7510	prad_p1000:99-091J_LN
prad_tcga:TCGA-HC-A631	prad_p1000:06-134H1_LN
prad_tcga:TCGA-KK-A6DY	prad_p1000:TCGA-XJ-A9DX
prad_tcga:TCGA-KK-A8IG	prad_p1000:05-116F_LUNG
prad_tcga:TCGA-V1-A8MJ	prad_p1000:PRAD-01115265-SM-6WZFB
prad_tcga:TCGA-V1-A8WW	prad_p1000:TP_2001
prad_tcga:TCGA-YL-A8HK	prad_p1000:PROS11496-6115321-SM-6CNQ5
prad_tcga:TCGA-YL-A8SB	prad_p1000:SC_9105
prad_tcga:TCGA-YL-A9WK	prad_p1000:TCGA-FC-A4JI
prad_tcga:TCGA-EJ-5531	prad_p1000:AAPC-STID0000011580-Tumor-SM-2XU1G
prad_tcga:TCGA-HC-7737	prad_p1000:TCGA-J9-A8CL
prad_tcga:TCGA-VP-AA1N	prad_p1000:03-082H1_LIVER
prad_tcga:TCGA-XJ-A83G	prad_p1000:08-093J1_LN
prad_tcga:TCGA-YL-A8S8	prad_p1000:TP_2061
prad_msk_stopsack_2021:P-0021482	prad_p1000:MO_1014
prad_msk_stopsack_2021:P-0013000	prad_p1000:PRAD-6115394.0-SM-7LGUG
prad_msk_stopsack_2021:P-0023666	prad_p1000:PRAD-6115385.0-SM-7LGU7
prad_msk_stopsack_2021:P-0005216	prad_p1000:PRAD-6115403.0-SM-7LGUQ
prad_msk_stopsack_2021:P-0022611	prad_p1000:PROS10448-1115154-SM-5EEBM
prad_msk_stopsack_2021:P-0025139	prad_p1000:SC_9010
prad_msk_stopsack_2021:P-0024762	prad_p1000:10680
prad_msk_stopsack_2021:P-0023419	prad_p1000:TCGA-KK-A8IA
prad_msk_stopsack_2021:P-0024095	prad_p1000:TCGA-KC-A7F6
prad_msk_stopsack_2021:P-0004482	prad_p1000:PR-0415
prad_msk_stopsack_2021:P-0008461	prad_p1000:TCGA-ZG-A9L1
prad_msk_stopsack_2021:P-0004910	prad_p1000:TCGA-ZG-A9LB
prad_msk_stopsack_2021:P-0011155	prad_p1000:99-064O_LN
prad_msk_stopsack_2021:P-0043158	prad_p1000:PROS11496-6115322-SM-6CNQ6
prad_msk_stopsack_2021:P-0006635	prad_p1000:PROS01448-1115202-SM-5SGU5
prad_msk_stopsack_2021:P-0021240	prad_p1000:PRAD-6115395.0-SM-7LGUH
prad_msk_stopsack_2021:P-0022430	prad_p1000:MO_1162
prad_msk_stopsack_2021:P-0001822	prad_p1000:PRAD-01115257-SM-6WZF8
prad_msk_stopsack_2021:P-0004061	prad_p1000:PROS01448-6115242-SM-67ES1
prad_msk_stopsack_2021:P-0005014	prad_p1000:PRAD-6115399.0-SM-7LGUL
prad_msk_stopsack_2021:P-0005773	prad_p1000:SC_9123
prad_msk_stopsack_2021:P-0006840	prad_p1000:PR-09-5630
prad_msk_stopsack_2021:P-0012030	prad_p1000:TCGA-HC-A6HX
prad_msk_stopsack_2021:P-0014613	prad_p1000:03-192B_LUNG
prad_msk_stopsack_2021:P-0016405	prad_p1000:SC_9087
prad_msk_stopsack_2021:P-0016617	prad_p1000:AAPC-STID0000021534-Tumor-SM-2XTYJ
prad_msk_stopsack_2021:P-0017754	prad_p1000:MO_1128
prad_msk_stopsack_2021:P-0019023	prad_p1000:TCGA-KK-A5A1
prad_msk_stopsack_2021:P-0020847	prad_p1000:TCGA-YJ-A8SW
prad_msk_stopsack_2021:P-0021728	prad_p1000:SC_9163
prad_msk_stopsack_2021:P-0021927	prad_p1000:PROS10448-SUTC.01115092-SM-4JC74
prad_msk_stopsack_2021:P-0029028	prad_p1000:PRAD-01115249-SM-6VZ7K
prad_msk_stopsack_2021:P-0030845	prad_p1000:SC_9107
prad_msk_stopsack_2021:P-0031769	prad_p1000:07-042H2_LN
prad_msk_stopsack_2021:P-0034890	prad_p1000:PRAD-6115401.0-SM-7LGUO
prad_msk_stopsack_2021:P-0040668	prad_p1000:SC_9035
prad_msk_stopsack_2021:P-0044509	prad_p1000:SC_9063
prad_msk_stopsack_2021:P-0046263	prad_p1000:05-214BB2_BONE
prad_msk_stopsack_2021:P-0047751	prad_p1000:AAPC-IP_LG-033-Tumor-SM-3NC6B
prad_msk_stopsack_2021:P-0002123	prad_p1000:MO_1179
prad_msk_stopsack_2021:P-0012630	prad_p1000:MO_1192
prad_msk_stopsack_2021:P-0028167	prad_p1000:PM161
prad_msk_stopsack_2021:P-0005713	prad_p1000:PRAD-6115386.0-SM-7LGU8
prad_msk_stopsack_2021:P-0048288	prad_p1000:PRAD-6115387.0-SM-7LGU9
prad_msk_stopsack_2021:P-0022557	prad_p1000:PRAD-6115391.0-SM-7LGUD
prad_msk_stopsack_2021:P-0010015	prad_p1000:PRAD-6115392.0-SM-7LGUE
prad_msk_stopsack_2021:P-0033667	prad_p1000:PROS11496-6115295-SM-6CNQ7
prad_msk_stopsack_2021:P-0040838	prad_p1000:PROS12319B-SU2C-06115118-SM-4W2ND
prad_msk_stopsack_2021:P-0019937	prad_p1000:SC_9073
prad_msk_stopsack_2021:P-0024219	prad_p1000:SC_9083
prad_msk_stopsack_2021:P-0040786	prad_p1000:SC_9084
prad_msk_stopsack_2021:P-0046590	prad_p1000:SC_9092
prad_msk_stopsack_2021:P-0024660	prad_p1000:SC_9096
prad_msk_stopsack_2021:P-0009044	prad_p1000:SC_9109
prad_msk_stopsack_2021:P-0009892	prad_p1000:SC_9121
prad_msk_stopsack_2021:P-0029645	prad_p1000:SC_9124
prad_msk_stopsack_2021:P-0045413	prad_p1000:SC_9137
prad_msk_stopsack_2021:P-0030013	prad_p1000:SC_9151
prad_msk_stopsack_2021:P-0004600	prad_p1000:SC_9153
prad_msk_stopsack_2021:P-0002894	prad_p1000:TP_2064
prad_msk_stopsack_2021:P-0035472	prad_p1000:12729
prad_msk_stopsack_2021:P-0003626	prad_p1000:TCGA-HC-8265
prad_msk_stopsack_2021:P-0020792	prad_p1000:TCGA-KC-A4BL
prad_msk_stopsack_2021:P-0017686	prad_p1000:11-028L1_LUNG
prad_msk_stopsack_2021:P-0035854	prad_p1000:TCGA-YL-A8SC
prad_msk_stopsack_2021:P-0047763	prad_p1000:SC_9173
prad_msk_stopsack_2021:P-0016450	prad_p1000:AAPC-IP_LG-053-Tumor-SM-3NC6P
prad_msk_stopsack_2021:P-0030580	prad_p1000:10362
prad_msk_stopsack_2021:P-0030976	prad_p1000:MO_1232
prad_msk_stopsack_2021:P-0033701	prad_p1000:PROS12319B-SU2C-06115121-SM-4W2NG
prad_msk_stopsack_2021:P-0037171	prad_p1000:SC_9046
prad_msk_stopsack_2021:P-0038066	prad_p1000:AAPC-STID0000021551-Tumor-SM-2XTYN
prad_msk_stopsack_2021:P-0039053	prad_p1000:AAPC-STID0000021598-Tumor-SM-2XTZN
prad_msk_stopsack_2021:P-0040672	prad_cdk12_mskcc_2020:P-0024080
prad_msk_stopsack_2021:P-0043840	prad_cdk12_mskcc_2020:P-0025823
prad_msk_stopsack_2021:P-0046991	prad_cdk12_mskcc_2020:P-0010178
prad_msk_stopsack_2021:P-0045170	prad_cdk12_mskcc_2020:P-0013865
prad_msk_stopsack_2021:P-0049144	prad_cdk12_mskcc_2020:P-0025550
prad_msk_stopsack_2021:P-0047470	prad_cdk12_mskcc_2020:P-0016921
prad_msk_stopsack_2021:P-0026409	prad_cdk12_mskcc_2020:P-0019114
prad_msk_stopsack_2021:P-0007515	prad_cdk12_mskcc_2020:P-0020882
prad_msk_stopsack_2021:P-0029087	prad_cdk12_mskcc_2020:P-0020495
prad_msk_stopsack_2021:P-0001071	prad_cdk12_mskcc_2020:P-0018581
prad_msk_stopsack_2021:P-0023838	prad_cdk12_mskcc_2020:P-0022420
prad_msk_stopsack_2021:P-0030801	prad_cdk12_mskcc_2020:P-0005216
prad_msk_stopsack_2021:P-0036545	prad_cdk12_mskcc_2020:P-0009056
prad_msk_stopsack_2021:P-0042930	prad_cdk12_mskcc_2020:P-0022611
prad_msk_stopsack_2021:P-0018588	prad_cdk12_mskcc_2020:P-0025139
prad_msk_stopsack_2021:P-0025676	prad_cdk12_mskcc_2020:P-0024762
prad_msk_stopsack_2021:P-0042475	prad_cdk12_mskcc_2020:P-0007219
prad_msk_stopsack_2021:P-0009399	prad_cdk12_mskcc_2020:P-0019863
prad_msk_stopsack_2021:P-0006692	prad_cdk12_mskcc_2020:P-0020833
prad_msk_stopsack_2021:P-0014523	prad_cdk12_mskcc_2020:P-0023958
prad_msk_stopsack_2021:P-0024307	prad_cdk12_mskcc_2020:P-0013358
prad_msk_stopsack_2021:P-0029523	prad_cdk12_mskcc_2020:P-0023419
prad_msk_stopsack_2021:P-0030029	prad_cdk12_mskcc_2020:P-0024095
prad_msk_stopsack_2021:P-0030717	prad_cdk12_mskcc_2020:P-0003541
prad_msk_stopsack_2021:P-0032868	prad_cdk12_mskcc_2020:P-0010796
prad_msk_stopsack_2021:P-0034327	prad_cdk12_mskcc_2020:P-0017271
prad_msk_stopsack_2021:P-0036235	prad_cdk12_mskcc_2020:P-0024598
prad_msk_stopsack_2021:P-0003597	prad_cdk12_mskcc_2020:P-0024913
prad_msk_stopsack_2021:P-0022892	prad_cdk12_mskcc_2020:P-0002984
prad_msk_stopsack_2021:P-0037151	prad_cdk12_mskcc_2020:P-0013401
prad_msk_stopsack_2021:P-0037689	prad_cdk12_mskcc_2020:P-0023741
prad_msk_stopsack_2021:P-0023028	prad_cdk12_mskcc_2020:P-0005454
prad_msk_stopsack_2021:P-0039805	prad_cdk12_mskcc_2020:P-0002894
prad_msk_stopsack_2021:P-0024522	prad_cdk12_mskcc_2020:P-0011096
prad_msk_stopsack_2021:P-0027466	prad_cdk12_mskcc_2020:P-0012197
prad_msk_stopsack_2021:P-0030628	prad_cdk12_mskcc_2020:P-0003626
prad_msk_stopsack_2021:P-0024249	prad_cdk12_mskcc_2020:P-0007182
prad_msk_stopsack_2021:P-0021600	prad_cdk12_mskcc_2020:P-0012031
prad_msk_stopsack_2021:P-0039351	prad_cdk12_mskcc_2020:P-0016876
prad_msk_stopsack_2021:P-0010823	prad_cdk12_mskcc_2020:P-0020984
prad_msk_stopsack_2021:P-0042252	prad_cdk12_mskcc_2020:P-0020078
prad_msk_stopsack_2021:P-0036805	prad_cdk12_mskcc_2020:P-0019624
prad_msk_stopsack_2021:P-0040259	prad_cdk12_mskcc_2020:P-0009082
prad_msk_stopsack_2021:P-0014009	prad_cdk12_mskcc_2020:P-0022117
prad_msk_stopsack_2021:P-0002375	prad_cdk12_mskcc_2020:P-0022437
prad_msk_stopsack_2021:P-0008769	prad_cdk12_mskcc_2020:P-0009687
prad_msk_stopsack_2021:P-0013844	prad_cdk12_mskcc_2020:P-0007307
prad_msk_stopsack_2021:P-0025137	prad_cdk12_mskcc_2020:P-0002516
prad_msk_stopsack_2021:P-0025332	prad_cdk12_mskcc_2020:P-0007629
prad_msk_stopsack_2021:P-0029852	prad_cdk12_mskcc_2020:P-0025676
prad_msk_stopsack_2021:P-0031392	prad_cdk12_mskcc_2020:P-0017097
prad_msk_stopsack_2021:P-0000935	prad_cdk12_mskcc_2020:P-0010015
prad_msk_stopsack_2021:P-0001092	prad_cdk12_mskcc_2020:P-0014004
prad_msk_stopsack_2021:P-0001247	prad_cdk12_mskcc_2020:P-0012834
prad_msk_stopsack_2021:P-0002740	prad_cdk12_mskcc_2020:P-0012834
prad_msk_stopsack_2021:P-0003395	prad_cdk12_mskcc_2020:P-0000600
prad_msk_stopsack_2021:P-0003511	prad_cdk12_mskcc_2020:P-0014009
prad_msk_stopsack_2021:P-0003925	prad_cdk12_mskcc_2020:P-0008441
prad_msk_stopsack_2021:P-0004312	prad_cdk12_mskcc_2020:P-0032194
prad_msk_stopsack_2021:P-0005636	prad_cdk12_mskcc_2020:P-0009543
prad_msk_stopsack_2021:P-0005756	prad_cdk12_mskcc_2020:P-0012675
prad_msk_stopsack_2021:P-0007358	prad_cdk12_mskcc_2020:P-0013844
prad_msk_stopsack_2021:P-0009656	prad_cdk12_mskcc_2020:P-0014333
prad_msk_stopsack_2021:P-0010078	prad_cdk12_mskcc_2020:P-0025137
prad_msk_stopsack_2021:P-0010309	prad_cdk12_mskcc_2020:P-0025332
prad_msk_stopsack_2021:P-0011370	prad_cdk12_mskcc_2020:P-0029852
prad_msk_stopsack_2021:P-0013465	prad_cdk12_mskcc_2020:P-0031392
prad_msk_stopsack_2021:P-0013674	prad_cdk12_mskcc_2020:P-0000935
prad_msk_stopsack_2021:P-0015618	prad_cdk12_mskcc_2020:P-0001092
prad_msk_stopsack_2021:P-0016396	prad_cdk12_mskcc_2020:P-0001247
prad_msk_stopsack_2021:P-0016983	prad_cdk12_mskcc_2020:P-0002740
prad_msk_stopsack_2021:P-0017882	prad_cdk12_mskcc_2020:P-0003395
prad_msk_stopsack_2021:P-0017886	prad_cdk12_mskcc_2020:P-0003511
prad_msk_stopsack_2021:P-0018627	prad_cdk12_mskcc_2020:P-0003925
prad_msk_stopsack_2021:P-0019623	prad_cdk12_mskcc_2020:P-0004312
prad_msk_stopsack_2021:P-0021023	prad_cdk12_mskcc_2020:P-0005636
prad_msk_stopsack_2021:P-0021297	prad_cdk12_mskcc_2020:P-0005756
prad_msk_stopsack_2021:P-0021597	prad_cdk12_mskcc_2020:P-0006806
prad_msk_stopsack_2021:P-0029604	prad_cdk12_mskcc_2020:P-0007358
prad_msk_stopsack_2021:P-0029728	prad_cdk12_mskcc_2020:P-0009656
prad_msk_stopsack_2021:P-0030675	prad_cdk12_mskcc_2020:P-0010078
prad_msk_stopsack_2021:P-0034431	prad_cdk12_mskcc_2020:P-0010309
prad_msk_stopsack_2021:P-0037029	prad_cdk12_mskcc_2020:P-0010823
prad_msk_stopsack_2021:P-0037177	prad_cdk12_mskcc_2020:P-0011370
prad_msk_stopsack_2021:P-0043060	prad_cdk12_mskcc_2020:P-0012630
prad_msk_stopsack_2021:P-0043323	prad_cdk12_mskcc_2020:P-0013465
prad_msk_stopsack_2021:P-0047982	prad_cdk12_mskcc_2020:P-0015618
prad_msk_stopsack_2021:P-0049809	prad_cdk12_mskcc_2020:P-0016296
prad_msk_stopsack_2021:P-0050086	prad_cdk12_mskcc_2020:P-0016396
prad_msk_stopsack_2021:P-0010382	prad_cdk12_mskcc_2020:P-0016983
prad_msk_stopsack_2021:P-0014076	prad_cdk12_mskcc_2020:P-0017882
prad_msk_stopsack_2021:P-0033226	prad_cdk12_mskcc_2020:P-0017886
prad_msk_stopsack_2021:P-0049188	prad_cdk12_mskcc_2020:P-0018627
prad_msk_stopsack_2021:P-0032646	prad_cdk12_mskcc_2020:P-0019623
prad_msk_stopsack_2021:P-0039300	prad_cdk12_mskcc_2020:P-0021023
prad_msk_stopsack_2021:P-0000140	prad_cdk12_mskcc_2020:P-0021297
prad_msk_stopsack_2021:P-0000888	prad_cdk12_mskcc_2020:P-0021597
prad_msk_stopsack_2021:P-0005649	prad_cdk12_mskcc_2020:P-0023249
prad_msk_stopsack_2021:P-0009543	prad_cdk12_mskcc_2020:P-0029604
prad_msk_stopsack_2021:P-0013732	prad_cdk12_mskcc_2020:P-0029728
prad_msk_stopsack_2021:P-0015134	prad_cdk12_mskcc_2020:P-0022439
prad_msk_stopsack_2021:P-0015264	prad_pik3r1_msk_2021:P-0036294
prad_msk_stopsack_2021:P-0030438	prad_pik3r1_msk_2021:P-0025550
prad_msk_stopsack_2021:P-0038044	prad_pik3r1_msk_2021:P-0016921
prad_msk_stopsack_2021:P-0038198	prad_pik3r1_msk_2021:P-0056943
prad_msk_stopsack_2021:P-0042476	prad_pik3r1_msk_2021:P-0019114
prad_msk_stopsack_2021:P-0043029	prad_pik3r1_msk_2021:P-0020495
prad_msk_stopsack_2021:P-0045856	prad_pik3r1_msk_2021:P-0040084
prad_msk_stopsack_2021:P-0047956	prad_pik3r1_msk_2021:P-0044058
prad_msk_stopsack_2021:P-0050309	prad_pik3r1_msk_2021:P-0049590
prad_msk_stopsack_2021:P-0000197	prad_pik3r1_msk_2021:P-0018581
prad_msk_stopsack_2021:P-0000377	prad_pik3r1_msk_2021:P-0015058
prad_msk_stopsack_2021:P-0000610	prad_pik3r1_msk_2021:P-0024762
prad_msk_stopsack_2021:P-0000647	prad_pik3r1_msk_2021:P-0019863
prad_msk_stopsack_2021:P-0001108	prad_pik3r1_msk_2021:P-0020833
prad_msk_stopsack_2021:P-0001128	prad_pik3r1_msk_2021:P-0023958
prad_msk_stopsack_2021:P-0001153	prad_pik3r1_msk_2021:P-0024598
prad_msk_stopsack_2021:P-0001262	prad_pik3r1_msk_2021:P-0024913
prad_msk_stopsack_2021:P-0001382	prad_pik3r1_msk_2021:P-0030812
prad_msk_stopsack_2021:P-0001445	prad_pik3r1_msk_2021:P-0004061
prad_msk_stopsack_2021:P-0001698	prad_pik3r1_msk_2021:P-0005014
prad_msk_stopsack_2021:P-0001776	prad_pik3r1_msk_2021:P-0043853
prad_msk_stopsack_2021:P-0001795	prad_pik3r1_msk_2021:P-0048288
prad_msk_stopsack_2021:P-0001861	prad_pik3r1_msk_2021:P-0010015
prad_msk_stopsack_2021:P-0002303	prad_pik3r1_msk_2021:P-0023380
prad_msk_stopsack_2021:P-0002431	prad_pik3r1_msk_2021:P-0045413
prad_msk_stopsack_2021:P-0002564	prad_pik3r1_msk_2021:P-0035765
prad_msk_stopsack_2021:P-0002897	prad_pik3r1_msk_2021:P-0023741
prad_msk_stopsack_2021:P-0003023	prad_pik3r1_msk_2021:P-0007182
prad_msk_stopsack_2021:P-0003390	prad_pik3r1_msk_2021:P-0012031
prad_msk_stopsack_2021:P-0003519	prad_pik3r1_msk_2021:P-0017686
prad_msk_stopsack_2021:P-0003538	prad_pik3r1_msk_2021:P-0005454
prad_msk_stopsack_2021:P-0003602	prad_pik3r1_msk_2021:P-0011096
prad_msk_stopsack_2021:P-0003619	prad_pik3r1_msk_2021:P-0016876
prad_msk_stopsack_2021:P-0003799	prad_pik3r1_msk_2021:P-0020984
prad_msk_stopsack_2021:P-0003939	prad_pik3r1_msk_2021:P-0049886
prad_msk_stopsack_2021:P-0004221	prad_pik3r1_msk_2021:P-0042663
prad_msk_stopsack_2021:P-0004830	prad_pik3r1_msk_2021:P-0019624
prad_msk_stopsack_2021:P-0005065	prad_pik3r1_msk_2021:P-0037751
prad_msk_stopsack_2021:P-0005147	prad_pik3r1_msk_2021:P-0038422
prad_msk_stopsack_2021:P-0005213	prad_pik3r1_msk_2021:P-0041584
prad_msk_stopsack_2021:P-0005217	prad_pik3r1_msk_2021:P-0045170
prad_msk_stopsack_2021:P-0005460	prad_pik3r1_msk_2021:P-0022340
prad_msk_stopsack_2021:P-0005697	prad_pik3r1_msk_2021:P-0017097
prad_msk_stopsack_2021:P-0005902	prad_pik3r1_msk_2021:P-0002516
prad_msk_stopsack_2021:P-0005956	prad_pik3r1_msk_2021:P-0043708
prad_msk_stopsack_2021:P-0006057	prad_pik3r1_msk_2021:P-0050289
prad_msk_stopsack_2021:P-0006378	prad_pik3r1_msk_2021:P-0018588
prad_msk_stopsack_2021:P-0006440	prad_pik3r1_msk_2021:P-0036545
prad_msk_stopsack_2021:P-0006595	prad_pik3r1_msk_2021:P-0014523
prad_msk_stopsack_2021:P-0006603	prad_pik3r1_msk_2021:P-0014004
prad_msk_stopsack_2021:P-0006767	prad_pik3r1_msk_2021:P-0051484
prad_msk_stopsack_2021:P-0006815	prad_pik3r1_msk_2021:P-0042252
prad_msk_stopsack_2021:P-0006837	prad_pik3r1_msk_2021:P-0005787
prad_msk_stopsack_2021:P-0006856	prad_pik3r1_msk_2021:P-0008441
prad_msk_stopsack_2021:P-0007006	prad_pik3r1_msk_2021:P-0012834
prad_msk_stopsack_2021:P-0007078	prad_pik3r1_msk_2021:P-0000935
prad_msk_stopsack_2021:P-0007219	prad_pik3r1_msk_2021:P-0001108
prad_msk_stopsack_2021:P-0007359	prad_pik3r1_msk_2021:P-0001128
prad_msk_stopsack_2021:P-0007393	prad_pik3r1_msk_2021:P-0001153
prad_msk_stopsack_2021:P-0007416	prad_pik3r1_msk_2021:P-0001382
prad_msk_stopsack_2021:P-0007576	prad_pik3r1_msk_2021:P-0001445
prad_msk_stopsack_2021:P-0007629	prad_pik3r1_msk_2021:P-0001698
prad_msk_stopsack_2021:P-0007749	prad_pik3r1_msk_2021:P-0001776
prad_msk_stopsack_2021:P-0007874	prad_pik3r1_msk_2021:P-0002303
prad_msk_stopsack_2021:P-0007965	prad_pik3r1_msk_2021:P-0002564
prad_msk_stopsack_2021:P-0008074	prad_pik3r1_msk_2021:P-0002740
prad_msk_stopsack_2021:P-0008077	prad_pik3r1_msk_2021:P-0003390
prad_msk_stopsack_2021:P-0008206	prad_pik3r1_msk_2021:P-0003395
prad_msk_stopsack_2021:P-0008330	prad_pik3r1_msk_2021:P-0003538
prad_msk_stopsack_2021:P-0008390	prad_pik3r1_msk_2021:P-0003602
prad_msk_stopsack_2021:P-0008525	prad_pik3r1_msk_2021:P-0003619
prad_msk_stopsack_2021:P-0008869	prad_pik3r1_msk_2021:P-0003925
prad_msk_stopsack_2021:P-0008879	prad_pik3r1_msk_2021:P-0004221
prad_msk_stopsack_2021:P-0009352	prad_pik3r1_msk_2021:P-0004312
prad_msk_stopsack_2021:P-0009640	prad_pik3r1_msk_2021:P-0004830
prad_msk_stopsack_2021:P-0009787	prad_pik3r1_msk_2021:P-0005098
prad_msk_stopsack_2021:P-0009989	prad_pik3r1_msk_2021:P-0005460
prad_msk_stopsack_2021:P-0010034	prad_pik3r1_msk_2021:P-0005636
prad_msk_stopsack_2021:P-0010071	prad_pik3r1_msk_2021:P-0005697
prad_msk_stopsack_2021:P-0010518	prad_pik3r1_msk_2021:P-0005756
prad_msk_stopsack_2021:P-0010959	prad_pik3r1_msk_2021:P-0005956
prad_msk_stopsack_2021:P-0011093	prad_pik3r1_msk_2021:P-0040262
prad_msk_stopsack_2021:P-0011364	prad_pik3r1_msk_2021:P-0038433
prad_msk_stopsack_2021:P-0012327	prad_pik3r1_msk_2021:P-0006635
prad_msk_stopsack_2021:P-0012368	prad_pik3r1_msk_2021:P-0008461
prad_msk_stopsack_2021:P-0012555	prad_pik3r1_msk_2021:P-0044288
prad_msk_stopsack_2021:P-0013115	prad_pik3r1_msk_2021:P-0052415
prad_msk_stopsack_2021:P-0013116	prad_pik3r1_msk_2021:P-0023028
prad_msk_stopsack_2021:P-0013457	prad_pik3r1_msk_2021:P-0009543
prad_msk_stopsack_2021:P-0013812	prad_pik3r1_msk_2021:P-0013732
prad_msk_stopsack_2021:P-0014235	prad_pik3r1_msk_2021:P-0022420
prad_msk_stopsack_2021:P-0014271	prad_su2c_2019:5115194
prad_msk_stopsack_2021:P-0014400	prad_su2c_2019:5115129
prad_msk_stopsack_2021:P-0014412	prad_su2c_2019:1115202
prad_msk_stopsack_2021:P-0014527	prad_su2c_2019:6115392
prad_msk_stopsack_2021:P-0014530	prad_su2c_2019:6115395
prad_msk_stopsack_2021:P-0014531	prad_su2c_2019:97115363
prad_msk_stopsack_2021:P-0014841	prad_su2c_2019:1115093
prad_msk_stopsack_2021:P-0015015	prad_pik3r1_msk_2021:P-0004482
prad_msk_stopsack_2021:P-0015132	prad_su2c_2019:5115290
prad_msk_stopsack_2021:P-0015250	prad_su2c_2019:5115505
prad_msk_stopsack_2021:P-0015406	prad_su2c_2019:96115272
prad_msk_stopsack_2021:P-0015448	prad_su2c_2019:97115449
prad_msk_stopsack_2021:P-0015628	prad_su2c_2019:13115443
prad_msk_stopsack_2021:P-0015767	prad_su2c_2019:5115650
prad_msk_stopsack_2021:P-0015817	prad_su2c_2019:5115261
prad_msk_stopsack_2021:P-0016015	prad_su2c_2019:5115128
prad_msk_stopsack_2021:P-0016063	prad_su2c_2019:97115358
prad_msk_stopsack_2021:P-0016812	prad_su2c_2019:9115109
prad_msk_stopsack_2021:P-0016877	prad_su2c_2019:1115265
prad_msk_stopsack_2021:P-0017041	prad_su2c_2019:6115399
prad_msk_stopsack_2021:P-0017548	prad_su2c_2019:96115513
prad_msk_stopsack_2021:P-0017605	prad_su2c_2019:6115285
prad_msk_stopsack_2021:P-0017708	prad_su2c_2019:1115463
prad_msk_stopsack_2021:P-0017892	prad_su2c_2019:6115401
prad_msk_stopsack_2021:P-0018068	prad_su2c_2019:5115022
prad_msk_stopsack_2021:P-0018384	prad_su2c_2019:97115376
prad_msk_stopsack_2021:P-0018704	prad_su2c_2019:97115564
prad_msk_stopsack_2021:P-0018791	prad_su2c_2019:5115030
prad_msk_stopsack_2021:P-0019199	prad_su2c_2019:6115402
prad_msk_stopsack_2021:P-0019781	prad_su2c_2019:97115563
prad_msk_stopsack_2021:P-0019815	prad_su2c_2019:97115079
prad_msk_stopsack_2021:P-0020023	prad_su2c_2019:5115609
prad_msk_stopsack_2021:P-0020237	prad_su2c_2019:96115491
prad_msk_stopsack_2021:P-0020424	prad_su2c_2019:9115515
prad_msk_stopsack_2021:P-0020750	prad_su2c_2019:1115092
prad_msk_stopsack_2021:P-0020802	prad_su2c_2019:5115075
prad_msk_stopsack_2021:P-0021083	prad_pik3r1_msk_2021:P-0024307
prad_msk_stopsack_2021:P-0021310	prad_su2c_2019:5115406
prad_msk_stopsack_2021:P-0021342	prad_pik3r1_msk_2021:P-0036176
prad_msk_stopsack_2021:P-0021388	prad_pik3r1_msk_2021:P-0032194
prad_msk_stopsack_2021:P-0022099	prad_pik3r1_msk_2021:P-0024522
prad_msk_stopsack_2021:P-0022343	prad_su2c_2019:5115127
prad_msk_stopsack_2021:P-0022439	prad_su2c_2019:97115071
prad_msk_stopsack_2021:P-0022700	prad_su2c_2019:9115338
prad_msk_stopsack_2021:P-0022825	prad_su2c_2019:97115166
prad_msk_stopsack_2021:P-0023030	prad_su2c_2019:1115503
prad_msk_stopsack_2021:P-0023249	prad_su2c_2019:9115415
prad_msk_stopsack_2021:P-0023276	prad_su2c_2019:9115068
prad_msk_stopsack_2021:P-0023307	prad_su2c_2019:9115067
prad_msk_stopsack_2021:P-0023345	prad_su2c_2019:9115048
prad_msk_stopsack_2021:P-0023546	prad_su2c_2019:6115590
prad_msk_stopsack_2021:P-0023621	prad_su2c_2019:1115257
prad_msk_stopsack_2021:P-0023874	prad_su2c_2019:6115242
prad_msk_stopsack_2021:P-0023958	prad_su2c_2019:5115152
prad_msk_stopsack_2021:P-0024140	prad_su2c_2019:97115454
prad_msk_stopsack_2021:P-0024316	prad_su2c_2019:97115315
prad_msk_stopsack_2021:P-0024382	prad_su2c_2019:6115599
prad_msk_stopsack_2021:P-0024534	prad_su2c_2019:5115187
prad_msk_stopsack_2021:P-0024600	prad_su2c_2019:6115118
prad_msk_stopsack_2021:P-0024898	prad_su2c_2019:5115078
prad_msk_stopsack_2021:P-0025140	prad_su2c_2019:9115516
prad_msk_stopsack_2021:P-0025150	prad_su2c_2019:97115558
prad_msk_stopsack_2021:P-0025319	prad_su2c_2019:5115160
prad_msk_stopsack_2021:P-0025494	prad_su2c_2019:13115277
prad_msk_stopsack_2021:P-0025759	prad_su2c_2019:97115005
prad_msk_stopsack_2021:P-0026196	prad_su2c_2019:9115339
prad_msk_stopsack_2021:P-0026237	prad_su2c_2019:97115281
prad_msk_stopsack_2021:P-0026395	prad_su2c_2019:9115107
prad_msk_stopsack_2021:P-0026447	prad_su2c_2019:97115009
prad_msk_stopsack_2021:P-0026808	prad_su2c_2019:5115506
prad_msk_stopsack_2021:P-0026871	prad_su2c_2019:9115422
prad_msk_stopsack_2021:P-0027160	prad_su2c_2019:97115375
prad_msk_stopsack_2021:P-0027245	prad_su2c_2019:97115335
prad_msk_stopsack_2021:P-0027453	prad_su2c_2019:9115519
prad_msk_stopsack_2021:P-0027874	prad_su2c_2019:5115608
prad_msk_stopsack_2021:P-0028102	prad_su2c_2019:9115185
prad_msk_stopsack_2021:P-0028430	prad_su2c_2019:5115648
prad_msk_stopsack_2021:P-0028551	prad_su2c_2019:97115151
prad_msk_stopsack_2021:P-0028569	prad_su2c_2019:9115041
prad_msk_stopsack_2021:P-0028576	prad_su2c_2019:9115184
prad_msk_stopsack_2021:P-0029948	prad_su2c_2019:97115147
prad_msk_stopsack_2021:P-0030086	prad_su2c_2019:97115561
prad_msk_stopsack_2021:P-0030184	prad_su2c_2019:97115337
prad_msk_stopsack_2021:P-0030842	prad_su2c_2019:5115611
prad_msk_stopsack_2021:P-0030943	prad_su2c_2019:9115051
prad_msk_stopsack_2021:P-0031771	prad_su2c_2019:9115171
prad_msk_stopsack_2021:P-0032390	prad_su2c_2019:9115340
prad_msk_stopsack_2021:P-0032478	prad_su2c_2019:9115416
prad_msk_stopsack_2021:P-0032801	prad_su2c_2019:5115259
prad_msk_stopsack_2021:P-0033194	prad_su2c_2019:5115076
prad_msk_stopsack_2021:P-0033300	prad_su2c_2019:5115198
prad_msk_stopsack_2021:P-0033660	prad_su2c_2019:5115260
prad_msk_stopsack_2021:P-0033961	prad_su2c_2019:5115405
prad_msk_stopsack_2021:P-0034298	prad_su2c_2019:5115528
prad_msk_stopsack_2021:P-0034946	prad_su2c_2019:9115571
prad_msk_stopsack_2021:P-0035170	prad_su2c_2019:97115001
prad_msk_stopsack_2021:P-0035221	prad_su2c_2019:97115131
prad_msk_stopsack_2021:P-0035283	prad_su2c_2019:97115188
prad_msk_stopsack_2021:P-0035562	prad_su2c_2019:97115316
prad_msk_stopsack_2021:P-0035818	prad_su2c_2019:97115447
prad_msk_stopsack_2021:P-0036120	prad_su2c_2019:6115601
prad_msk_stopsack_2021:P-0036215	prad_su2c_2019:6115235
prad_msk_stopsack_2021:P-0036346	prad_su2c_2019:97115148
prad_msk_stopsack_2021:P-0036349	prad_su2c_2019:96115204
prad_msk_stopsack_2021:P-0036492	prad_su2c_2019:5115023
prad_msk_stopsack_2021:P-0036555	prad_su2c_2019:97115331
prad_msk_stopsack_2021:P-0036675	prad_su2c_2019:9115567
prad_msk_stopsack_2021:P-0036677	prad_su2c_2019:6115391
prad_msk_stopsack_2021:P-0037255	prad_su2c_2019:5115291
prad_msk_stopsack_2021:P-0037701	prad_su2c_2019:6115013
prad_msk_stopsack_2021:P-0038328	prad_su2c_2019:1115020
prad_msk_stopsack_2021:P-0038349	prad_su2c_2019:1115249
prad_msk_stopsack_2021:P-0038369	prad_su2c_2019:1115554
prad_msk_stopsack_2021:P-0038412	prad_su2c_2019:1115574
prad_msk_stopsack_2021:P-0038559	prad_su2c_2019:5115195
prad_msk_stopsack_2021:P-0038584	prad_su2c_2019:5115412
prad_msk_stopsack_2021:P-0038808	prad_su2c_2019:6115121
prad_msk_stopsack_2021:P-0038856	prad_su2c_2019:6115251
prad_msk_stopsack_2021:P-0039550	prad_su2c_2019:6115295
prad_msk_stopsack_2021:P-0039771	prad_su2c_2019:6115383
prad_msk_stopsack_2021:P-0040136	prad_su2c_2019:6115386
prad_msk_stopsack_2021:P-0040207	prad_su2c_2019:6115387
prad_msk_stopsack_2021:P-0040965	prad_su2c_2019:9115036
prad_msk_stopsack_2021:P-0040995	prad_su2c_2019:9115539
prad_msk_stopsack_2021:P-0041461	prad_su2c_2019:9115566
prad_msk_stopsack_2021:P-0041546	prad_su2c_2019:9115585
prad_msk_stopsack_2021:P-0041659	prad_su2c_2019:96115209
prad_msk_stopsack_2021:P-0041732	prad_su2c_2019:96115497
prad_msk_stopsack_2021:P-0042249	prad_su2c_2019:97115280
prad_msk_stopsack_2021:P-0042583	prad_su2c_2019:97115003
prad_msk_stopsack_2021:P-0042681	prad_su2c_2019:6115322
prad_msk_stopsack_2021:P-0042826	prad_mcspc_mskcc_2020:P-0025823
prad_msk_stopsack_2021:P-0042830	prad_su2c_2019:5115033
prad_msk_stopsack_2021:P-0042957	prad_su2c_2019:1115569
prad_msk_stopsack_2021:P-0042971	prad_su2c_2019:96115642
prad_msk_stopsack_2021:P-0043235	prad_su2c_2019:9115111
prad_msk_stopsack_2021:P-0044376	prad_su2c_2019:96115624
prad_msk_stopsack_2021:P-0044550	prad_su2c_2019:5115547
prad_msk_stopsack_2021:P-0044601	prad_su2c_2019:5115196
prad_msk_stopsack_2021:P-0044884	prad_mcspc_mskcc_2020:P-0005454
prad_msk_stopsack_2021:P-0045146	prad_mcspc_mskcc_2020:P-0010178
prad_msk_stopsack_2021:P-0045250	prad_mcspc_mskcc_2020:P-0013865
prad_msk_stopsack_2021:P-0045399	prad_mcspc_mskcc_2020:P-0010796
prad_msk_stopsack_2021:P-0045412	prad_mcspc_mskcc_2020:P-0024080
prad_msk_stopsack_2021:P-0046586	prad_mcspc_mskcc_2020:P-0007182
prad_msk_stopsack_2021:P-0046812	prad_mcspc_mskcc_2020:P-0012031
prad_msk_stopsack_2021:P-0046826	prad_mcspc_mskcc_2020:P-0019624
prad_msk_stopsack_2021:P-0047008	prad_mcspc_mskcc_2020:P-0025676
prad_msk_stopsack_2021:P-0047799	prad_mcspc_mskcc_2020:P-0025137
prad_msk_stopsack_2021:P-0047959	prad_mcspc_mskcc_2020:P-0001092
prad_msk_stopsack_2021:P-0048602	prad_mcspc_mskcc_2020:P-0003395
prad_msk_stopsack_2021:P-0048955	prad_mcspc_mskcc_2020:P-0005213
prad_msk_stopsack_2021:P-0049520	prad_mcspc_mskcc_2020:P-0009656
prad_msk_stopsack_2021:P-0049963	prad_mcspc_mskcc_2020:P-0016396
prad_msk_stopsack_2021:P-0050169	prad_mcspc_mskcc_2020:P-0020078
prad_msk_stopsack_2021:P-0017491	prad_mcspc_mskcc_2020:P-0009687
prad_msk_stopsack_2021:P-0029323	prad_mcspc_mskcc_2020:P-0017097
prad_msk_stopsack_2021:P-0005216	prad_mcspc_mskcc_2020:P-0014004
prad_msk_stopsack_2021:P-0004482	prad_su2c_2019:6115115
prad_msk_stopsack_2021:P-0008461	prad_su2c_2019:5115612
prad_msk_stopsack_2021:P-0004910	prad_su2c_2019:9115568
prad_msk_stopsack_2021:P-0006635	prad_su2c_2019:1115154
prad_msk_stopsack_2021:P-0001822	prad_su2c_2019:6115014
prad_msk_stopsack_2021:P-0004061	prad_su2c_2019:9115035
prad_msk_stopsack_2021:P-0005014	prad_su2c_2019:96115138
prad_msk_stopsack_2021:P-0005773	prad_su2c_2019:96115475
prad_msk_stopsack_2021:P-0006840	prad_su2c_2019:96115473
prad_msk_stopsack_2021:P-0002123	prad_mskcc:PCA0084
prad_msk_stopsack_2021:P-0004600	prad_mskcc:PCA0115
prad_msk_stopsack_2021:P-0002894	prad_mskcc:PCA0213
prad_msk_stopsack_2021:P-0003626	prad_mskcc:PCA0187
prad_msk_stopsack_2021:P-0009082	prad_mskcc:PCA0206
prad_msk_stopsack_2021:P-0000640	prad_mskcc:PCA0167
prad_msk_stopsack_2021:P-0007515	prad_mskcc:PCA0018
prad_msk_stopsack_2021:P-0001071	prad_mskcc:PCA0168
prad_msk_stopsack_2021:P-0006692	prad_mskcc:PCA0141
prad_msk_stopsack_2021:P-0003597	prad_mskcc:PCA0018
prad_msk_stopsack_2021:P-0000600	prad_mskcc:PCA0168
prad_msk_stopsack_2021:P-0000912	prad_mskcc:PCA0141
prad_msk_stopsack_2021:P-0002375	prad_mskcc:PCA0058
prad_msk_stopsack_2021:P-0000935	prad_mskcc:PCA0193
prad_msk_stopsack_2021:P-0001092	prad_mskcc:PCA0190
prad_msk_stopsack_2021:P-0001247	prad_mskcc:PCA0211
prad_msk_stopsack_2021:P-0002740	prostate_dkfz_2018:ICGC_PCA125
prad_msk_stopsack_2021:P-0003395	prostate_dkfz_2018:ICGC_PCA084
prad_msk_stopsack_2021:P-0003511	prostate_dkfz_2018:ICGC_PCA192
prad_msk_stopsack_2021:P-0003538	prostate_dkfz_2018:ICGC_PCA041
prad_msk_stopsack_2021:P-0003925	prad_su2c_2019:97115560
prad_msk_stopsack_2021:P-0004312	prad_su2c_2019:97115007
prad_msk_stopsack_2021:P-0005065	prad_su2c_2019:6115114
prad_msk_stopsack_2021:P-0005636	prostate_dkfz_2018:ICGC_PCA043
prad_msk_stopsack_2021:P-0005756	prad_su2c_2019:96115274
prad_mskcc_2017:P-0006806	prad_su2c_2019:96115210
prad_mskcc_2017:P-0007358	prad_su2c_2019:1115161
prad_mskcc_2017:P-0009044	prad_su2c_2019:9115182
prad_mskcc_2017:P-0000140	prad_su2c_2019:9115541
prad_mskcc_2017:P-0000888	prad_mskcc:PCA0144
prad_mskcc_2017:P-0005649	prad_mskcc:PCA0209
prad_mskcc_2017:P-0000197	prad_mskcc:PCA0182
prad_mskcc_2017:P-0000377	prad_mskcc:PCA0201
prad_mskcc_2017:P-0000610	prad_mskcc:PCA0135
prad_mskcc_2017:P-0000647	prad_mskcc:PCA0210
prad_mskcc_2017:P-0001108	prad_mskcc:PCA0038
prad_mskcc_2017:P-0001128	prad_su2c_2019:97115167
prad_mskcc_2017:P-0001153	prad_su2c_2019:9115580
prad_mskcc_2017:P-0001262	prad_su2c_2019:97115333
prad_mskcc_2017:P-0001382	prad_su2c_2019:1115444
prad_mskcc_2017:P-0001445	prad_su2c_2019:9115420
prad_mskcc_2017:P-0001630	prad_su2c_2019:1115378
prad_mskcc_2017:P-0001698	prad_su2c_2019:1115083
prad_mskcc_2017:P-0001776	prad_su2c_2019:9115052
prad_mskcc_2017:P-0001795	prad_su2c_2019:6115403
prad_mskcc_2017:P-0001861	prad_su2c_2019:9115521
prad_mskcc_2017:P-0002303	prad_su2c_2019:96115292
prad_mskcc_2017:P-0002564	prad_su2c_2019:97115278
prad_mskcc_2017:P-0002897	prad_su2c_2019:6115394
prad_mskcc_2017:P-0003023	prad_su2c_2019:5115130
prad_mskcc_2017:P-0003390
prad_mskcc_2017:P-0003519
prad_mskcc_2017:P-0003602
prad_mskcc_2017:P-0003619
prad_mskcc_2017:P-0003799
prad_mskcc_2017:P-0003939
prad_mskcc_2017:P-0004221
prad_mskcc_2017:P-0004556
prad_mskcc_2017:P-0004830
prad_mskcc_2017:P-0005098
prad_mskcc_2017:P-0005147
prad_mskcc_2017:P-0005213
prad_mskcc_2017:P-0005217
prad_mskcc_2017:P-0005460
prad_mskcc_2017:P-0005697
prad_mskcc_2017:P-0005902
prad_mskcc_2017:P-0005956
prad_mskcc_2017:P-0006057
prad_mskcc_2017:P-0006378
prad_mskcc_2017:P-0006440
prad_mskcc_2017:P-0006595
prad_mskcc_2017:P-0006603
prad_mskcc_2017:P-0006837
prad_mskcc_2017:P-0006856
prad_mskcc_2017:P-0006905
prad_mskcc_2017:P-0007006
prad_mskcc_2017:P-0007078
prad_mskcc_2017:P-0007219
prad_mskcc_2017:P-0007359
prad_mskcc_2017:P-0007393
prad_mskcc_2017:P-0007416
prad_mskcc_2017:P-0007576
prad_mskcc_2017:P-0007629
prad_mskcc_2017:P-0007749
prad_mskcc_2017:P-0007856
prad_mskcc_2017:P-0007874
prad_mskcc_2017:P-0007965
prad_mskcc_2017:P-0008074
prad_mskcc_2017:P-0008206
prad_mskcc_2017:P-0008330
prad_mskcc_2017:P-0008390
prad_mskcc_2017:P-0008525
prad_mskcc_2017:P-0008869
prad_mskcc_2017:P-0008879
prad_mskcc_2017:P-0009352
prad_p1000:PROS10448-SUTC.01115081-SM-4JC6A
prad_p1000:AAPC-STID0000020209-Tumor-SM-2XU21
prad_p1000:AAPC-STID0000021613-Tumor-SM-2XU1K
prad_p1000:PM15
prad_p1000:PR-09-5702
prad_p1000:PRAD-01115284-SM-6WZF6
prad_p1000:SC_9080
prad_p1000:SC_9139
prad_p1000:TCGA-CH-5766
prad_p1000:TCGA-CH-5792
prad_p1000:TCGA-J4-A67M
prad_p1000:TCGA-J4-A83J
prad_p1000:TCGA-J9-A52B
prad_p1000:TCGA-KK-A6E5
prad_p1000:TCGA-V1-A8MG
prad_p1000:TCGA-YL-A8HM
prad_p1000:SC_9158
prad_p1000:PR-00-160
prad_p1000:TCGA-CH-5752
prad_p1000:SC_9082
prad_p1000:05-217L3_LUNG
prad_p1000:AAPC-STID0000021586-Tumor-SM-2XU24
prad_p1000:AAPC-STID0000021606-Tumor-SM-2XTZX
prad_p1000:AAPC-STID0000006860-Tumor-SM-2XU12
prad_p1000:AAPC-STID0000008820-Tumor-SM-2XU16
prad_p1000:AAPC-STID0000008920-Tumor-SM-2XU17
prad_p1000:TCGA-HC-7818
prad_p1000:98-328K_PERITONEUM
prad_p1000:TP_2079
prad_p1000:TCGA-XK-AAIW
prad_p1000:SC_9058
prad_p1000:SC_9047
prad_p1000:PROS12319B-SU2C-06115115-SM-4W2NA
prad_p1000:SC_9006
prad_p1000:PRAD-STID7520-Tumor-SM-2RXM6
prad_p1000:TCGA-M7-A71Y
prad_p1000:AAPC-IP_LG-045-Tumor-SM-3NC6H
prad_p1000:04-149E2_LN
prad_p1000:00-029N9_LN
prad_p1000:05-148E3_LIVER
prad_p1000:AAPC-IP_LG-047-Tumor-SM-3NC6J
prad_p1000:AAPC-STID0000020508-Tumor-SM-2XU22
prad_p1000:TCGA-CH-5788
prad_p1000:TCGA-HC-8257
prad_p1000:TCGA-KK-A7AQ
prad_p1000:TCGA-KK-A8I8
prad_p1000:TCGA-KK-A59Z
prad_p1000:TCGA-V1-A8MM
prad_p1000:TCGA-V1-A9OA
prad_p1000:TCGA-V1-A9Z7
prad_p1000:TCGA-YL-A8SK
prad_p1000:P04-1243
prad_p1000:11040
prad_p1000:AAPC-STID0000021574-Tumor-SM-3RVWF
prad_p1000:PROS10448-SUTC.01115090-SM-4JC6W
prad_p1000:PROS11496-6115285-SM-6CNPX
prad_p1000:TCGA-EJ-A46G
prad_p1000:TCGA-ZG-A9KY
prad_p1000:TCGA-ZG-A9LS
prad_p1000:TCGA-ZG-A9LZ
prad_p1000:SC_9036
prad_p1000:TCGA-EJ-A8FP
prad_p1000:TCGA-EJ-5515
prad_p1000:TCGA-EJ-5524
prad_p1000:TCGA-ZG-A9LN
prad_p1000:PRAD-6115398.0-SM-7LGUK
prad_p1000:PROS01448-6115219-SM-67ERS
prad_p1000:PROS10448-SUTC.01115082-SM-4JC6B
prad_p1000:MO_1241
prad_p1000:SC_9029
prad_p1000:99-090A2_LIVER
prad_p1000:SC_9093
prad_p1000:PRAD-6115396.0-SM-7LGUI
prad_p1000:PROS11496-6115319-SM-6CNQ3
prad_p1000:PROS12319B-SU2C-06115122-SM-4W2NH
prad_p1000:SC_9038
prad_p1000:SC_9150
prad_p1000:05-221MM1_BONE
prad_p1000:MO_1244
prad_p1000:PM119
prad_p1000:PM189
prad_p1000:PRAD-6115400.0-SM-7LGUM
prad_p1000:SC_9016
prad_p1000:SC_9061
prad_p1000:SC_9091
prad_p1000:SC_9141
prad_p1000:SC_9148
prad_p1000:TP_2010
prad_p1000:SC_9140
prad_p1000:SC_9172
prad_p1000:MO_1114
prad_p1000:07-062F2_LUNG
prad_p1000:08-006H1_LN
prad_p1000:10-013F1_LN
prad_p1000:MO_1008
prad_p1000:MO_1013
prad_p1000:MO_1015
prad_p1000:MO_1096
prad_p1000:MO_1130
prad_p1000:MO_1202
prad_p1000:MO_1277
prad_p1000:MO_1337
prad_p1000:MO_1473
prad_p1000:PM2
prad_p1000:PM6-Halo-TM
prad_p1000:PM78
prad_p1000:PM121
prad_p1000:PM124
prad_p1000:PM172
prad_p1000:PRAD-6115389.0-SM-7LGUB
prad_p1000:PROS01448-6115224-SM-67ERT
prad_p1000:PROS01448-6115247-SM-67ES2
prad_p1000:PROS10448-SUTC.01115085-SM-4JC6J
prad_p1000:PROS10448-SUTC.01115089-SM-4JC6T
prad_p1000:SC_9021
prad_p1000:SC_9022
prad_p1000:SC_9030
prad_p1000:SC_9048
prad_p1000:SC_9055
prad_p1000:SC_9059
prad_p1000:SC_9071
prad_p1000:SC_9072
prad_p1000:SC_9076
prad_p1000:SC_9094
prad_p1000:SC_9097
prad_p1000:SC_9100
prad_p1000:SC_9114
prad_p1000:SC_9118
prad_p1000:SC_9132
prad_p1000:SC_9156
prad_p1000:TP_2020
prad_p1000:MO_1139
prad_p1000:PM156
prad_p1000:PROS11496-6115320-SM-6CNQ4
prad_p1000:PROS11496-6115323-SM-6CNQ8
prad_p1000:AAPC-IP_LG-083-Tumor-SM-3NC7C
prad_p1000:AAPC-STID0000010200-Tumor-SM-2XU1A
prad_p1000:AAPC-STID0000021530-Tumor-SM-3RVW4
prad_p1000:AAPC-STID0000021557-Tumor-SM-3RVWA
prad_p1000:AAPC-STID0000021590-Tumor-SM-2XTZF
prad_p1000:P09-1580
prad_p1000:PRAD-STID0000004240-Tumor-SM-S932
prad_p1000:PROS01448-6115234-SM-67ERX
prad_p1000:SC_9043
prad_p1000:SC_9049
prad_p1000:TCGA-CH-5740
prad_p1000:TCGA-CH-5768
prad_p1000:TCGA-EJ-A65G
prad_p1000:TCGA-EJ-A65M
prad_p1000:TCGA-EJ-AB27
prad_p1000:TCGA-EJ-5527
prad_p1000:TCGA-EJ-8474
prad_p1000:TCGA-HC-A6AQ
prad_p1000:TCGA-HC-A6AS
prad_p1000:TCGA-HC-7747
prad_p1000:TCGA-HC-7752
prad_p1000:TCGA-J4-A67T
prad_p1000:TCGA-J4-8198
prad_p1000:TCGA-KK-A7B3
prad_p1000:TCGA-KK-A8I9
prad_p1000:TCGA-V1-A9ZG
prad_p1000:TCGA-ZG-A9L5
prad_p1000:AAPC-STID0000021583-Tumor-SM-3RVWI
prad_p1000:TP_2077
prad_p1000:AAPC-IP_LG-057-Tumor-SM-3NC6T
prad_p1000:AAPC-IP_LG-021-Tumor-SM-3NC63
prad_p1000:AAPC-STID0000009880-Tumor-SM-2XU19
prad_p1000:AAPC-STID0000021536-Tumor-SM-3RVW6
prad_p1000:AAPC-STID0000021556-Tumor-SM-3RVW9
prad_p1000:AAPC-STID0000021564-Tumor-SM-3RVWC
prad_p1000:AAPC-STID0000021573-Tumor-SM-2XTYZ
prad_p1000:AAPC-STID0000021584-Tumor-SM-2XTZ6
prad_p1000:12-021H4_LIVER
prad_p1000:PM10
prad_p1000:TCGA-HC-7230
prad_p1000:PR-05-839
prad_p1000:MO_1105
prad_p1000:P01-28
prad_p1000:PM154
prad_p1000:PR-09-5700
prad_p1000:SC_9032
prad_p1000:SC_9104
prad_p1000:TCGA-EJ-5516
prad_p1000:TCGA-J4-A67K
prad_p1000:TCGA-V1-A8WS
prad_p1000:TCGA-YL-A8SP
prad_p1000:TCGA-HC-A9TH
prad_p1000:AAPC-IP_LG-031-Tumor-SM-3NC69
prad_p1000:AAPC-IP_LG-051-Tumor-SM-3NC6N
prad_p1000:AAPC-IP_LG-091-Tumor-SM-3NC7I
prad_p1000:AAPC-STID0000012848-Tumor-SM-2XU1N
prad_p1000:MO_1020
prad_p1000:MO_1071
prad_p1000:MO_1095
prad_p1000:MO_1118
prad_p1000:P06-4428
prad_p1000:P07-5036
prad_p1000:PM155
prad_p1000:PR-02-254
prad_p1000:PR-06-1999
prad_p1000:PRAD-6115383.0-SM-7LGU6
prad_p1000:PROS01448-DFCI.10-448.P27-SM-5CQ5J
prad_p1000:PROS01448-DFCI.10-448.P38-SM-5CQ52
prad_p1000:PROS01448-6115251-SM-67ES6
prad_p1000:PROS10448-SUTC.01115091-SM-4JC6Y
prad_p1000:PROS11496-6115317-SM-6CNQ2
prad_p1000:PROS12319B-SU2C-06115120-SM-4W2NF
prad_p1000:SC_9008
prad_p1000:SC_9017
prad_p1000:SC_9028
prad_p1000:SC_9031
prad_p1000:SC_9068
prad_p1000:SC_9086
prad_p1000:SC_9126
prad_p1000:SC_9142
prad_p1000:TCGA-CH-5761
prad_p1000:TCGA-EJ-A7NH
prad_p1000:TCGA-EJ-5507
prad_p1000:TCGA-EJ-5521
prad_p1000:TCGA-EJ-7315
prad_p1000:TCGA-EJ-8472
prad_p1000:TCGA-G9-A9S0
prad_p1000:TCGA-G9-A9S4
prad_p1000:TCGA-G9-6499
prad_p1000:TCGA-G9-7510
prad_p1000:TCGA-HC-A48F
prad_p1000:TCGA-HC-A631
prad_p1000:TCGA-HC-A632
prad_p1000:TCGA-HI-7171
prad_p1000:TCGA-J4-A67L
prad_p1000:TCGA-J9-A8CK
prad_p1000:TCGA-KK-A6DY
prad_p1000:TCGA-KK-A8IG
prad_p1000:TCGA-V1-A8MJ
prad_p1000:TCGA-V1-A9O5
prad_p1000:TCGA-VP-A872
prad_p1000:TCGA-XJ-A9DI
prad_p1000:TCGA-YL-A8HK
prad_p1000:TCGA-YL-A8HL
prad_p1000:TCGA-YL-A8SB
prad_p1000:TCGA-YL-A9WH
prad_p1000:TCGA-YL-A9WK
prad_p1000:TCGA-YL-A9WX
prad_p1000:TCGA-YL-A9WY
prad_p1000:TCGA-ZG-A9LM
prad_p1000:7951
prad_p1000:10361
prad_p1000:20870
prad_p1000:21011
prad_p1000:21016
prad_cdk12_mskcc_2020:P-0021482
prad_cdk12_mskcc_2020:P-0023666
prad_cdk12_mskcc_2020:P-0004482
prad_cdk12_mskcc_2020:P-0008461
prad_cdk12_mskcc_2020:P-0006635
prad_cdk12_mskcc_2020:P-0021240
prad_cdk12_mskcc_2020:P-0022430
prad_cdk12_mskcc_2020:P-0001822
prad_cdk12_mskcc_2020:P-0004061
prad_cdk12_mskcc_2020:P-0005014
prad_cdk12_mskcc_2020:P-0006840
prad_cdk12_mskcc_2020:P-0012030
prad_cdk12_mskcc_2020:P-0013000
prad_cdk12_mskcc_2020:P-0014613
prad_cdk12_mskcc_2020:P-0016405
prad_cdk12_mskcc_2020:P-0016617
prad_cdk12_mskcc_2020:P-0017754
prad_cdk12_mskcc_2020:P-0019023
prad_cdk12_mskcc_2020:P-0020847
prad_cdk12_mskcc_2020:P-0021728
prad_cdk12_mskcc_2020:P-0021927
prad_cdk12_mskcc_2020:P-0029028
prad_cdk12_mskcc_2020:P-0030845
prad_cdk12_mskcc_2020:P-0031769
prad_cdk12_mskcc_2020:P-0002123
prad_cdk12_mskcc_2020:P-0018649
prad_cdk12_mskcc_2020:P-0019582
prad_cdk12_mskcc_2020:P-0028167
prad_cdk12_mskcc_2020:P-0004600
prad_cdk12_mskcc_2020:P-0020792
prad_cdk12_mskcc_2020:P-0017686
prad_cdk12_mskcc_2020:P-0016450
prad_cdk12_mskcc_2020:P-0030580
prad_cdk12_mskcc_2020:P-0030976
prad_cdk12_mskcc_2020:P-0022340
prad_cdk12_mskcc_2020:P-0005771
prad_cdk12_mskcc_2020:P-0008591
prad_cdk12_mskcc_2020:P-0022557
prad_cdk12_mskcc_2020:P-0026409
prad_cdk12_mskcc_2020:P-0007515
prad_cdk12_mskcc_2020:P-0024554
prad_cdk12_mskcc_2020:P-0023838
prad_cdk12_mskcc_2020:P-0030801
prad_cdk12_mskcc_2020:P-0018588
prad_cdk12_mskcc_2020:P-0009399
prad_cdk12_mskcc_2020:P-0006692
prad_cdk12_mskcc_2020:P-0014523
prad_cdk12_mskcc_2020:P-0024307
prad_cdk12_mskcc_2020:P-0029523
prad_cdk12_mskcc_2020:P-0030029
prad_cdk12_mskcc_2020:P-0030717
prad_cdk12_mskcc_2020:P-0032868
prad_cdk12_mskcc_2020:P-0003597
prad_cdk12_mskcc_2020:P-0022892
prad_cdk12_mskcc_2020:P-0015206
prad_cdk12_mskcc_2020:P-0029105
prad_cdk12_mskcc_2020:P-0003139
prad_cdk12_mskcc_2020:P-0005445
prad_cdk12_mskcc_2020:P-0005555
prad_cdk12_mskcc_2020:P-0005806
prad_cdk12_mskcc_2020:P-0011003
prad_cdk12_mskcc_2020:P-0014689
prad_cdk12_mskcc_2020:P-0017232
prad_cdk12_mskcc_2020:P-0021596
prad_cdk12_mskcc_2020:P-0024522
prad_cdk12_mskcc_2020:P-0027466
prad_cdk12_mskcc_2020:P-0000912
prad_cdk12_mskcc_2020:P-0024249
prad_cdk12_mskcc_2020:P-0026162
prad_cdk12_mskcc_2020:P-0008344
prad_cdk12_mskcc_2020:P-0001446
prad_cdk12_mskcc_2020:P-0003450
prad_cdk12_mskcc_2020:P-0018607
prad_cdk12_mskcc_2020:P-0008960
prad_cdk12_mskcc_2020:P-0009402
prad_cdk12_mskcc_2020:P-0014408
prad_cdk12_mskcc_2020:P-0015991
prad_cdk12_mskcc_2020:P-0001884
prad_cdk12_mskcc_2020:P-0017169
prad_cdk12_mskcc_2020:P-0023839
prad_cdk12_mskcc_2020:P-0021104
prad_cdk12_mskcc_2020:P-0000683
prad_cdk12_mskcc_2020:P-0001768
prad_cdk12_mskcc_2020:P-0003468
prad_cdk12_mskcc_2020:P-0003592
prad_cdk12_mskcc_2020:P-0005047
prad_cdk12_mskcc_2020:P-0005787
prad_cdk12_mskcc_2020:P-0008048
prad_cdk12_mskcc_2020:P-0009818
prad_cdk12_mskcc_2020:P-0010953
prad_cdk12_mskcc_2020:P-0011437
prad_cdk12_mskcc_2020:P-0013372
prad_cdk12_mskcc_2020:P-0016288
prad_cdk12_mskcc_2020:P-0016307
prad_cdk12_mskcc_2020:P-0016538
prad_cdk12_mskcc_2020:P-0017944
prad_cdk12_mskcc_2020:P-0018956
prad_cdk12_mskcc_2020:P-0019782
prad_cdk12_mskcc_2020:P-0020394
prad_cdk12_mskcc_2020:P-0021853
prad_cdk12_mskcc_2020:P-0025222
prad_cdk12_mskcc_2020:P-0025571
prad_cdk12_mskcc_2020:P-0027082
prad_cdk12_mskcc_2020:P-0008057
prad_cdk12_mskcc_2020:P-0011090
prad_cdk12_mskcc_2020:P-0013505
prad_cdk12_mskcc_2020:P-0022584
prad_cdk12_mskcc_2020:P-0024117
prad_cdk12_mskcc_2020:P-0024217
prad_cdk12_mskcc_2020:P-0026097
prad_cdk12_mskcc_2020:P-0003678
prad_cdk12_mskcc_2020:P-0010272
prad_cdk12_mskcc_2020:P-0000449
prad_cdk12_mskcc_2020:P-0000521
prad_cdk12_mskcc_2020:P-0000842
prad_cdk12_mskcc_2020:P-0001021
prad_cdk12_mskcc_2020:P-0001204
prad_cdk12_mskcc_2020:P-0001717
prad_cdk12_mskcc_2020:P-0001859
prad_cdk12_mskcc_2020:P-0002739
prad_cdk12_mskcc_2020:P-0002796
prad_cdk12_mskcc_2020:P-0003040
prad_cdk12_mskcc_2020:P-0003625
prad_cdk12_mskcc_2020:P-0004231
prad_cdk12_mskcc_2020:P-0004389
prad_cdk12_mskcc_2020:P-0005761
prad_cdk12_mskcc_2020:P-0005933
prad_cdk12_mskcc_2020:P-0005970
prad_cdk12_mskcc_2020:P-0006128
prad_cdk12_mskcc_2020:P-0006584
prad_cdk12_mskcc_2020:P-0007043
prad_cdk12_mskcc_2020:P-0007770
prad_cdk12_mskcc_2020:P-0008928
prad_cdk12_mskcc_2020:P-0009374
prad_cdk12_mskcc_2020:P-0009908
prad_cdk12_mskcc_2020:P-0010029
prad_cdk12_mskcc_2020:P-0010746
prad_cdk12_mskcc_2020:P-0011299
prad_cdk12_mskcc_2020:P-0011475
prad_cdk12_mskcc_2020:P-0011529
prad_cdk12_mskcc_2020:P-0012181
prad_cdk12_mskcc_2020:P-0012184
prad_cdk12_mskcc_2020:P-0013503
prad_cdk12_mskcc_2020:P-0013697
prad_cdk12_mskcc_2020:P-0013810
prad_cdk12_mskcc_2020:P-0014204
prad_cdk12_mskcc_2020:P-0014571
prad_cdk12_mskcc_2020:P-0015960
prad_cdk12_mskcc_2020:P-0016117
prad_cdk12_mskcc_2020:P-0019332
prad_cdk12_mskcc_2020:P-0019819
prad_cdk12_mskcc_2020:P-0019840
prad_cdk12_mskcc_2020:P-0021698
prad_cdk12_mskcc_2020:P-0022406
prad_cdk12_mskcc_2020:P-0023026
prad_cdk12_mskcc_2020:P-0023961
prad_cdk12_mskcc_2020:P-0024076
prad_cdk12_mskcc_2020:P-0024589
prad_cdk12_mskcc_2020:P-0024686
prad_cdk12_mskcc_2020:P-0026072
prad_cdk12_mskcc_2020:P-0026706
prad_cdk12_mskcc_2020:P-0026855
prad_cdk12_mskcc_2020:P-0028784
prad_cdk12_mskcc_2020:P-0029059
prad_cdk12_mskcc_2020:P-0032256
prad_cdk12_mskcc_2020:P-0034378
prad_cdk12_mskcc_2020:P-0014076
prad_cdk12_mskcc_2020:P-0033226
prad_cdk12_mskcc_2020:P-0009044
prad_cdk12_mskcc_2020:P-0032646
prad_cdk12_mskcc_2020:P-0005649
prad_cdk12_mskcc_2020:P-0013732
prad_cdk12_mskcc_2020:P-0015134
prad_cdk12_mskcc_2020:P-0030438
prad_cdk12_mskcc_2020:P-0000197
prad_cdk12_mskcc_2020:P-0000377
prad_cdk12_mskcc_2020:P-0000610
prad_cdk12_mskcc_2020:P-0000647
prad_cdk12_mskcc_2020:P-0001108
prad_cdk12_mskcc_2020:P-0001128
prad_cdk12_mskcc_2020:P-0001153
prad_cdk12_mskcc_2020:P-0001262
prad_cdk12_mskcc_2020:P-0001382
prad_cdk12_mskcc_2020:P-0001445
prad_cdk12_mskcc_2020:P-0001630
prad_cdk12_mskcc_2020:P-0001698
prad_cdk12_mskcc_2020:P-0001776
prad_cdk12_mskcc_2020:P-0001795
prad_cdk12_mskcc_2020:P-0001861
prad_cdk12_mskcc_2020:P-0002303
prad_cdk12_mskcc_2020:P-0002431
prad_cdk12_mskcc_2020:P-0002564
prad_cdk12_mskcc_2020:P-0002897
prad_cdk12_mskcc_2020:P-0003023
prad_cdk12_mskcc_2020:P-0003390
prad_cdk12_mskcc_2020:P-0003519
prad_cdk12_mskcc_2020:P-0003538
prad_cdk12_mskcc_2020:P-0003602
prad_cdk12_mskcc_2020:P-0003619
prad_cdk12_mskcc_2020:P-0003799
prad_cdk12_mskcc_2020:P-0003939
prad_cdk12_mskcc_2020:P-0004221
prad_cdk12_mskcc_2020:P-0004556
prad_cdk12_mskcc_2020:P-0004830
prad_cdk12_mskcc_2020:P-0005065
prad_cdk12_mskcc_2020:P-0005098
prad_cdk12_mskcc_2020:P-0005147
prad_cdk12_mskcc_2020:P-0005213
prad_cdk12_mskcc_2020:P-0005217
prad_cdk12_mskcc_2020:P-0005460
prad_cdk12_mskcc_2020:P-0005697
prad_cdk12_mskcc_2020:P-0005902
prad_cdk12_mskcc_2020:P-0005956
prad_cdk12_mskcc_2020:P-0006057
prad_cdk12_mskcc_2020:P-0006378
prad_cdk12_mskcc_2020:P-0006440
prad_cdk12_mskcc_2020:P-0006595
prad_cdk12_mskcc_2020:P-0006603
prad_cdk12_mskcc_2020:P-0006767
prad_cdk12_mskcc_2020:P-0006815
prad_cdk12_mskcc_2020:P-0006837
prad_cdk12_mskcc_2020:P-0006856
prad_cdk12_mskcc_2020:P-0006905
prad_cdk12_mskcc_2020:P-0007006
prad_cdk12_mskcc_2020:P-0007078
prad_cdk12_mskcc_2020:P-0007359
prad_cdk12_mskcc_2020:P-0007393
prad_cdk12_mskcc_2020:P-0007416
prad_cdk12_mskcc_2020:P-0007576
prad_cdk12_mskcc_2020:P-0007749
prad_cdk12_mskcc_2020:P-0007856
prad_cdk12_mskcc_2020:P-0007874
prad_cdk12_mskcc_2020:P-0007965
prad_cdk12_mskcc_2020:P-0008069
prad_cdk12_mskcc_2020:P-0008074
prad_cdk12_mskcc_2020:P-0008077
prad_cdk12_mskcc_2020:P-0008206
prad_cdk12_mskcc_2020:P-0008330
prad_cdk12_mskcc_2020:P-0008390
prad_cdk12_mskcc_2020:P-0008525
prad_cdk12_mskcc_2020:P-0008869
prad_cdk12_mskcc_2020:P-0008879
prad_cdk12_mskcc_2020:P-0009352
prad_cdk12_mskcc_2020:P-0009640
prad_cdk12_mskcc_2020:P-0009787
prad_cdk12_mskcc_2020:P-0009989
prad_cdk12_mskcc_2020:P-0010071
prad_cdk12_mskcc_2020:P-0010518
prad_cdk12_mskcc_2020:P-0011093
prad_cdk12_mskcc_2020:P-0011364
prad_cdk12_mskcc_2020:P-0012321
prad_cdk12_mskcc_2020:P-0012327
prad_cdk12_mskcc_2020:P-0012368
prad_cdk12_mskcc_2020:P-0012555
prad_cdk12_mskcc_2020:P-0013032
prad_cdk12_mskcc_2020:P-0013115
prad_cdk12_mskcc_2020:P-0013457
prad_cdk12_mskcc_2020:P-0013674
prad_cdk12_mskcc_2020:P-0013812
prad_cdk12_mskcc_2020:P-0014080
prad_cdk12_mskcc_2020:P-0014235
prad_cdk12_mskcc_2020:P-0014400
prad_cdk12_mskcc_2020:P-0014412
prad_cdk12_mskcc_2020:P-0014527
prad_cdk12_mskcc_2020:P-0014530
prad_cdk12_mskcc_2020:P-0014531
prad_cdk12_mskcc_2020:P-0014841
prad_cdk12_mskcc_2020:P-0015015
prad_cdk12_mskcc_2020:P-0015132
prad_cdk12_mskcc_2020:P-0015250
prad_cdk12_mskcc_2020:P-0015406
prad_cdk12_mskcc_2020:P-0015448
prad_cdk12_mskcc_2020:P-0015628
prad_cdk12_mskcc_2020:P-0015767
prad_cdk12_mskcc_2020:P-0015817
prad_cdk12_mskcc_2020:P-0016812
prad_cdk12_mskcc_2020:P-0016877
prad_cdk12_mskcc_2020:P-0017041
prad_cdk12_mskcc_2020:P-0017548
prad_cdk12_mskcc_2020:P-0017605
prad_cdk12_mskcc_2020:P-0017708
prad_cdk12_mskcc_2020:P-0017892
prad_cdk12_mskcc_2020:P-0018068
prad_cdk12_mskcc_2020:P-0018384
prad_cdk12_mskcc_2020:P-0018704
prad_cdk12_mskcc_2020:P-0018791
prad_cdk12_mskcc_2020:P-0018798
prad_cdk12_mskcc_2020:P-0019781
prad_cdk12_mskcc_2020:P-0019815
prad_cdk12_mskcc_2020:P-0020023
prad_cdk12_mskcc_2020:P-0020150
prad_cdk12_mskcc_2020:P-0020237
prad_cdk12_mskcc_2020:P-0020424
prad_cdk12_mskcc_2020:P-0020750
prad_cdk12_mskcc_2020:P-0020802
prad_cdk12_mskcc_2020:P-0021083
prad_cdk12_mskcc_2020:P-0021310
prad_cdk12_mskcc_2020:P-0021342
prad_cdk12_mskcc_2020:P-0021388
prad_cdk12_mskcc_2020:P-0021874
prad_cdk12_mskcc_2020:P-0022099
prad_cdk12_mskcc_2020:P-0022343
prad_cdk12_mskcc_2020:P-0022672
prad_cdk12_mskcc_2020:P-0022700
prad_cdk12_mskcc_2020:P-0022825
prad_cdk12_mskcc_2020:P-0023030
prad_cdk12_mskcc_2020:P-0023276
prad_cdk12_mskcc_2020:P-0023345
prad_cdk12_mskcc_2020:P-0023546
prad_cdk12_mskcc_2020:P-0023621
prad_cdk12_mskcc_2020:P-0023874
prad_cdk12_mskcc_2020:P-0024140
prad_cdk12_mskcc_2020:P-0024316
prad_cdk12_mskcc_2020:P-0024534
prad_cdk12_mskcc_2020:P-0024600
prad_cdk12_mskcc_2020:P-0024898
prad_cdk12_mskcc_2020:P-0025140
prad_cdk12_mskcc_2020:P-0025150
prad_cdk12_mskcc_2020:P-0025319
prad_cdk12_mskcc_2020:P-0025494
prad_cdk12_mskcc_2020:P-0025759
prad_cdk12_mskcc_2020:P-0026196
prad_cdk12_mskcc_2020:P-0026237
prad_cdk12_mskcc_2020:P-0026395
prad_cdk12_mskcc_2020:P-0026447
prad_cdk12_mskcc_2020:P-0026808
prad_cdk12_mskcc_2020:P-0026871
prad_cdk12_mskcc_2020:P-0027160
prad_cdk12_mskcc_2020:P-0027245
prad_cdk12_mskcc_2020:P-0027453
prad_cdk12_mskcc_2020:P-0027874
prad_cdk12_mskcc_2020:P-0028053
prad_cdk12_mskcc_2020:P-0028102
prad_cdk12_mskcc_2020:P-0028430
prad_cdk12_mskcc_2020:P-0028551
prad_cdk12_mskcc_2020:P-0030184
prad_cdk12_mskcc_2020:P-0030943
prad_cdk12_mskcc_2020:P-0031771
prad_cdk12_mskcc_2020:P-0032478
prad_cdk12_mskcc_2020:P-0032801
prad_cdk12_mskcc_2020:P-0038369
prad_cdk12_mskcc_2020:P-0017491
prad_cdk12_mskcc_2020:P-0021482
prad_cdk12_mskcc_2020:P-0013000
prad_pik3r1_msk_2021:P-0043325
prad_pik3r1_msk_2021:P-0051435
prad_pik3r1_msk_2021:P-0026238
prad_pik3r1_msk_2021:P-0043158
prad_pik3r1_msk_2021:P-0021240
prad_pik3r1_msk_2021:P-0022430
prad_pik3r1_msk_2021:P-0022611
prad_pik3r1_msk_2021:P-0025139
prad_pik3r1_msk_2021:P-0001822
prad_pik3r1_msk_2021:P-0006840
prad_pik3r1_msk_2021:P-0012030
prad_pik3r1_msk_2021:P-0013358
prad_pik3r1_msk_2021:P-0014613
prad_pik3r1_msk_2021:P-0016405
prad_pik3r1_msk_2021:P-0016617
prad_pik3r1_msk_2021:P-0017754
prad_pik3r1_msk_2021:P-0019023
prad_pik3r1_msk_2021:P-0021728
prad_pik3r1_msk_2021:P-0021927
prad_pik3r1_msk_2021:P-0023419
prad_pik3r1_msk_2021:P-0023666
prad_pik3r1_msk_2021:P-0024095
prad_pik3r1_msk_2021:P-0029028
prad_pik3r1_msk_2021:P-0031769
prad_pik3r1_msk_2021:P-0034890
prad_pik3r1_msk_2021:P-0040668
prad_pik3r1_msk_2021:P-0044509
prad_pik3r1_msk_2021:P-0046263
prad_pik3r1_msk_2021:P-0047751
prad_pik3r1_msk_2021:P-0048653
prad_pik3r1_msk_2021:P-0050888
prad_pik3r1_msk_2021:P-0051586
prad_pik3r1_msk_2021:P-0053240
prad_pik3r1_msk_2021:P-0002123
prad_pik3r1_msk_2021:P-0012630
prad_pik3r1_msk_2021:P-0016594
prad_pik3r1_msk_2021:P-0028167
prad_pik3r1_msk_2021:P-0005713
prad_pik3r1_msk_2021:P-0013036
prad_pik3r1_msk_2021:P-0054042
prad_pik3r1_msk_2021:P-0016538
prad_pik3r1_msk_2021:P-0022557
prad_pik3r1_msk_2021:P-0000373
prad_pik3r1_msk_2021:P-0013503
prad_pik3r1_msk_2021:P-0021853
prad_pik3r1_msk_2021:P-0009044
prad_pik3r1_msk_2021:P-0012104
prad_pik3r1_msk_2021:P-0004600
prad_pik3r1_msk_2021:P-0035472
prad_pik3r1_msk_2021:P-0035854
prad_pik3r1_msk_2021:P-0054566
prad_pik3r1_msk_2021:P-0055770
prad_pik3r1_msk_2021:P-0016450
prad_pik3r1_msk_2021:P-0020792
prad_pik3r1_msk_2021:P-0030580
prad_pik3r1_msk_2021:P-0030976
prad_pik3r1_msk_2021:P-0033701
prad_pik3r1_msk_2021:P-0038066
prad_pik3r1_msk_2021:P-0039053
prad_pik3r1_msk_2021:P-0040672
prad_pik3r1_msk_2021:P-0046991
prad_pik3r1_msk_2021:P-0049144
prad_pik3r1_msk_2021:P-0054535
prad_pik3r1_msk_2021:P-0008591
prad_pik3r1_msk_2021:P-0007515
prad_pik3r1_msk_2021:P-0023838
prad_pik3r1_msk_2021:P-0024554
prad_pik3r1_msk_2021:P-0009399
prad_pik3r1_msk_2021:P-0006692
prad_pik3r1_msk_2021:P-0042930
prad_pik3r1_msk_2021:P-0025676
prad_pik3r1_msk_2021:P-0029523
prad_pik3r1_msk_2021:P-0030717
prad_pik3r1_msk_2021:P-0032868
prad_pik3r1_msk_2021:P-0034327
prad_pik3r1_msk_2021:P-0042475
prad_pik3r1_msk_2021:P-0045492
prad_pik3r1_msk_2021:P-0053666
prad_pik3r1_msk_2021:P-0003597
prad_pik3r1_msk_2021:P-0057414
prad_pik3r1_msk_2021:P-0047806
prad_pik3r1_msk_2021:P-0054692
prad_pik3r1_msk_2021:P-0010639
prad_pik3r1_msk_2021:P-0037151
prad_pik3r1_msk_2021:P-0033226
prad_pik3r1_msk_2021:P-0049188
prad_pik3r1_msk_2021:P-0002304
prad_pik3r1_msk_2021:P-0005698
prad_pik3r1_msk_2021:P-0032646
prad_pik3r1_msk_2021:P-0039300
prad_pik3r1_msk_2021:P-0025137
prad_pik3r1_msk_2021:P-0029852
prad_pik3r1_msk_2021:P-0030438
prad_pik3r1_msk_2021:P-0038198
prad_pik3r1_msk_2021:P-0042476
prad_pik3r1_msk_2021:P-0043029
prad_pik3r1_msk_2021:P-0045856
prad_pik3r1_msk_2021:P-0047956
prad_pik3r1_msk_2021:P-0057447
prad_pik3r1_msk_2021:P-0054214
prad_pik3r1_msk_2021:P-0003033
prad_pik3r1_msk_2021:P-0001242
prad_pik3r1_msk_2021:P-0001697
prad_pik3r1_msk_2021:P-0001768
prad_pik3r1_msk_2021:P-0003052
prad_pik3r1_msk_2021:P-0003101
prad_pik3r1_msk_2021:P-0003442
prad_pik3r1_msk_2021:P-0003468
prad_pik3r1_msk_2021:P-0004285
prad_pik3r1_msk_2021:P-0004597
prad_pik3r1_msk_2021:P-0005047
prad_pik3r1_msk_2021:P-0006749
prad_pik3r1_msk_2021:P-0007267
prad_pik3r1_msk_2021:P-0007313
prad_pik3r1_msk_2021:P-0001426
prad_pik3r1_msk_2021:P-0002149
prad_pik3r1_msk_2021:P-0004735
prad_pik3r1_msk_2021:P-0005864
prad_pik3r1_msk_2021:P-0008966
prad_pik3r1_msk_2021:P-0009686
prad_pik3r1_msk_2021:P-0027466
prad_pik3r1_msk_2021:P-0039805
prad_pik3r1_msk_2021:P-0000610
prad_pik3r1_msk_2021:P-0006378
prad_pik3r1_msk_2021:P-0006440
prad_pik3r1_msk_2021:P-0006595
prad_pik3r1_msk_2021:P-0006767
prad_pik3r1_msk_2021:P-0006815
prad_pik3r1_msk_2021:P-0006837
prad_pik3r1_msk_2021:P-0006856
prad_pik3r1_msk_2021:P-0006905
prad_pik3r1_msk_2021:P-0007006
prad_pik3r1_msk_2021:P-0007358
prad_pik3r1_msk_2021:P-0007416
prad_pik3r1_msk_2021:P-0007576
prad_pik3r1_msk_2021:P-0007629
prad_pik3r1_msk_2021:P-0007749
prad_pik3r1_msk_2021:P-0007856
prad_pik3r1_msk_2021:P-0008074
prad_pik3r1_msk_2021:P-0008206
prad_pik3r1_msk_2021:P-0008390
prad_pik3r1_msk_2021:P-0008525
prad_pik3r1_msk_2021:P-0008869
prad_pik3r1_msk_2021:P-0008879
prad_pik3r1_msk_2021:P-0009352
prad_pik3r1_msk_2021:P-0009640
prad_pik3r1_msk_2021:P-0009656
prad_pik3r1_msk_2021:P-0009989
prad_pik3r1_msk_2021:P-0010078
prad_pik3r1_msk_2021:P-0010309
prad_pik3r1_msk_2021:P-0010518
prad_pik3r1_msk_2021:P-0010959
prad_pik3r1_msk_2021:P-0011093
prad_pik3r1_msk_2021:P-0012321
prad_pik3r1_msk_2021:P-0012555
prad_pik3r1_msk_2021:P-0013032
prad_pik3r1_msk_2021:P-0013457
prad_pik3r1_msk_2021:P-0013465
prad_pik3r1_msk_2021:P-0013674
prad_pik3r1_msk_2021:P-0014076
prad_pik3r1_msk_2021:P-0014080
prad_pik3r1_msk_2021:P-0014235
prad_pik3r1_msk_2021:P-0014400
prad_pik3r1_msk_2021:P-0014412
prad_pik3r1_msk_2021:P-0014531
prad_pik3r1_msk_2021:P-0014841
prad_pik3r1_msk_2021:P-0015015
prad_pik3r1_msk_2021:P-0015132
prad_pik3r1_msk_2021:P-0015250
prad_pik3r1_msk_2021:P-0015406
prad_pik3r1_msk_2021:P-0015448
prad_pik3r1_msk_2021:P-0016296
prad_pik3r1_msk_2021:P-0016396
prad_pik3r1_msk_2021:P-0016812
prad_pik3r1_msk_2021:P-0017041
prad_pik3r1_msk_2021:P-0017605
prad_pik3r1_msk_2021:P-0017708
prad_pik3r1_msk_2021:P-0017892
prad_pik3r1_msk_2021:P-0018068
prad_pik3r1_msk_2021:P-0018627
prad_pik3r1_msk_2021:P-0018704
prad_pik3r1_msk_2021:P-0018707
prad_pik3r1_msk_2021:P-0018791
prad_pik3r1_msk_2021:P-0018798
prad_pik3r1_msk_2021:P-0019781
prad_pik3r1_msk_2021:P-0019815
prad_pik3r1_msk_2021:P-0020237
prad_pik3r1_msk_2021:P-0020424
prad_pik3r1_msk_2021:P-0020750
prad_pik3r1_msk_2021:P-0020844
prad_pik3r1_msk_2021:P-0021023
prad_pik3r1_msk_2021:P-0021083
prad_pik3r1_msk_2021:P-0021297
prad_pik3r1_msk_2021:P-0021310
prad_pik3r1_msk_2021:P-0021342
prad_pik3r1_msk_2021:P-0021388
prad_pik3r1_msk_2021:P-0021597
prad_pik3r1_msk_2021:P-0021874
prad_pik3r1_msk_2021:P-0022070
prad_pik3r1_msk_2021:P-0022099
prad_pik3r1_msk_2021:P-0022343
prad_pik3r1_msk_2021:P-0022439
prad_pik3r1_msk_2021:P-0022672
prad_pik3r1_msk_2021:P-0022700
prad_pik3r1_msk_2021:P-0022825
prad_pik3r1_msk_2021:P-0023030
prad_pik3r1_msk_2021:P-0023345
prad_pik3r1_msk_2021:P-0023546
prad_pik3r1_msk_2021:P-0023621
prad_pik3r1_msk_2021:P-0023930
prad_pik3r1_msk_2021:P-0024140
prad_pik3r1_msk_2021:P-0024534
prad_pik3r1_msk_2021:P-0024898
prad_pik3r1_msk_2021:P-0025150
prad_pik3r1_msk_2021:P-0025494
prad_pik3r1_msk_2021:P-0025759
prad_pik3r1_msk_2021:P-0026196
prad_pik3r1_msk_2021:P-0026240
prad_pik3r1_msk_2021:P-0026447
prad_pik3r1_msk_2021:P-0026808
prad_pik3r1_msk_2021:P-0026871
prad_pik3r1_msk_2021:P-0027245
prad_pik3r1_msk_2021:P-0027453
prad_pik3r1_msk_2021:P-0027874
prad_pik3r1_msk_2021:P-0028569
prad_pik3r1_msk_2021:P-0028576
prad_pik3r1_msk_2021:P-0029728
prad_pik3r1_msk_2021:P-0029948
prad_pik3r1_msk_2021:P-0030184
prad_pik3r1_msk_2021:P-0030384
prad_pik3r1_msk_2021:P-0030842
prad_pik3r1_msk_2021:P-0030872
prad_pik3r1_msk_2021:P-0030943
prad_pik3r1_msk_2021:P-0031189
prad_pik3r1_msk_2021:P-0031579
prad_pik3r1_msk_2021:P-0032379
prad_pik3r1_msk_2021:P-0032478
prad_pik3r1_msk_2021:P-0032801
prad_pik3r1_msk_2021:P-0033194
prad_pik3r1_msk_2021:P-0033300
prad_pik3r1_msk_2021:P-0033660
prad_pik3r1_msk_2021:P-0033961
prad_pik3r1_msk_2021:P-0034431
prad_pik3r1_msk_2021:P-0034538
prad_pik3r1_msk_2021:P-0034946
prad_pik3r1_msk_2021:P-0035219
prad_pik3r1_msk_2021:P-0035221
prad_pik3r1_msk_2021:P-0035283
prad_pik3r1_msk_2021:P-0035911
prad_pik3r1_msk_2021:P-0036120
prad_pik3r1_msk_2021:P-0036215
prad_pik3r1_msk_2021:P-0036349
prad_pik3r1_msk_2021:P-0036492
prad_pik3r1_msk_2021:P-0036555
prad_pik3r1_msk_2021:P-0036557
prad_pik3r1_msk_2021:P-0036677
prad_pik3r1_msk_2021:P-0037029
prad_pik3r1_msk_2021:P-0037177
prad_pik3r1_msk_2021:P-0037701
prad_pik3r1_msk_2021:P-0038328
prad_pik3r1_msk_2021:P-0038349
prad_pik3r1_msk_2021:P-0038369
prad_pik3r1_msk_2021:P-0038412
prad_pik3r1_msk_2021:P-0038856
prad_pik3r1_msk_2021:P-0039550
prad_pik3r1_msk_2021:P-0039771
prad_pik3r1_msk_2021:P-0040136
prad_pik3r1_msk_2021:P-0040207
prad_pik3r1_msk_2021:P-0040995
prad_pik3r1_msk_2021:P-0041659
prad_pik3r1_msk_2021:P-0041732
prad_pik3r1_msk_2021:P-0042249
prad_pik3r1_msk_2021:P-0042583
prad_pik3r1_msk_2021:P-0042826
prad_pik3r1_msk_2021:P-0042957
prad_pik3r1_msk_2021:P-0043235
prad_pik3r1_msk_2021:P-0043709
prad_pik3r1_msk_2021:P-0044376
prad_pik3r1_msk_2021:P-0045146
prad_pik3r1_msk_2021:P-0045399
prad_pik3r1_msk_2021:P-0045412
prad_pik3r1_msk_2021:P-0046812
prad_pik3r1_msk_2021:P-0047982
prad_pik3r1_msk_2021:P-0048761
prad_pik3r1_msk_2021:P-0048955
prad_pik3r1_msk_2021:P-0049809
prad_pik3r1_msk_2021:P-0049963
prad_pik3r1_msk_2021:P-0049974
prad_pik3r1_msk_2021:P-0050086
prad_pik3r1_msk_2021:P-0050169
prad_pik3r1_msk_2021:P-0050705
prad_pik3r1_msk_2021:P-0050716
prad_pik3r1_msk_2021:P-0051264
prad_pik3r1_msk_2021:P-0051311
prad_pik3r1_msk_2021:P-0051352
prad_pik3r1_msk_2021:P-0051820
prad_pik3r1_msk_2021:P-0052092
prad_pik3r1_msk_2021:P-0053406
prad_pik3r1_msk_2021:P-0053704
prad_pik3r1_msk_2021:P-0054218
prad_pik3r1_msk_2021:P-0054319
prad_pik3r1_msk_2021:P-0054506
prad_pik3r1_msk_2021:P-0054652
prad_pik3r1_msk_2021:P-0054763
prad_pik3r1_msk_2021:P-0055122
prad_pik3r1_msk_2021:P-0055380
prad_pik3r1_msk_2021:P-0055638
prad_pik3r1_msk_2021:P-0055685
prad_pik3r1_msk_2021:P-0055707
prad_pik3r1_msk_2021:P-0055712
prad_pik3r1_msk_2021:P-0056388
prad_pik3r1_msk_2021:P-0057179
prad_pik3r1_msk_2021:P-0057530
prad_pik3r1_msk_2021:P-0057634
prad_pik3r1_msk_2021:P-0061187
prad_pik3r1_msk_2021:P-0017491
prad_pik3r1_msk_2021:P-0025988
prad_pik3r1_msk_2021:P-0000318
prad_pik3r1_msk_2021:P-0001297
prad_pik3r1_msk_2021:P-0005555
prad_pik3r1_msk_2021:P-0005806
prad_pik3r1_msk_2021:P-0007184
prad_pik3r1_msk_2021:P-0011003
prad_pik3r1_msk_2021:P-0000441
prad_pik3r1_msk_2021:P-0000442
prad_pik3r1_msk_2021:P-0000659
prad_pik3r1_msk_2021:P-0000725
prad_pik3r1_msk_2021:P-0000842
prad_pik3r1_msk_2021:P-0000909
prad_pik3r1_msk_2021:P-0000931
prad_pik3r1_msk_2021:P-0000966
prad_pik3r1_msk_2021:P-0001021
prad_pik3r1_msk_2021:P-0001141
prad_pik3r1_msk_2021:P-0001204
prad_pik3r1_msk_2021:P-0001319
prad_pik3r1_msk_2021:P-0001332
prad_pik3r1_msk_2021:P-0001407
prad_pik3r1_msk_2021:P-0001493
prad_pik3r1_msk_2021:P-0001636
prad_pik3r1_msk_2021:P-0001684
prad_pik3r1_msk_2021:P-0001829
prad_pik3r1_msk_2021:P-0001884
prad_pik3r1_msk_2021:P-0002206
prad_pik3r1_msk_2021:P-0002273
prad_pik3r1_msk_2021:P-0002364
prad_pik3r1_msk_2021:P-0002372
prad_pik3r1_msk_2021:P-0002375
prad_pik3r1_msk_2021:P-0002398
prad_pik3r1_msk_2021:P-0002439
prad_pik3r1_msk_2021:P-0002612
prad_pik3r1_msk_2021:P-0002901
prad_pik3r1_msk_2021:P-0002959
prad_pik3r1_msk_2021:P-0002962
prad_pik3r1_msk_2021:P-0002974
prad_pik3r1_msk_2021:P-0002990
prad_pik3r1_msk_2021:P-0002999
prad_pik3r1_msk_2021:P-0003028
prad_pik3r1_msk_2021:P-0003040
prad_pik3r1_msk_2021:P-0003150
prad_pik3r1_msk_2021:P-0003226
prad_pik3r1_msk_2021:P-0003400
prad_pik3r1_msk_2021:P-0003419
prad_pik3r1_msk_2021:P-0003504
prad_pik3r1_msk_2021:P-0003506
prad_pik3r1_msk_2021:P-0003556
prad_pik3r1_msk_2021:P-0003655
prad_pik3r1_msk_2021:P-0003852
prad_pik3r1_msk_2021:P-0003856
prad_pik3r1_msk_2021:P-0003971
prad_pik3r1_msk_2021:P-0004039
prad_pik3r1_msk_2021:P-0004243
prad_su2c_2019:9115040
prad_su2c_2019:96115145
prad_su2c_2019:96115275
prad_su2c_2019:6115592
prad_su2c_2019:96115629
prad_su2c_2019:96115622
prad_su2c_2019:9115046
prad_su2c_2019:5115614
prad_su2c_2019:5115098
prad_su2c_2019:96115639
prad_su2c_2019:96115640
prad_su2c_2019:1115581
prad_su2c_2019:96115273
prad_su2c_2019:6115396
prad_su2c_2019:13115404
prad_su2c_2019:6115296
prad_su2c_2019:1115015
prad_su2c_2019:1115087
prad_su2c_2019:1115311
prad_su2c_2019:96115631
prad_su2c_2019:13115262
prad_su2c_2019:5115651
prad_su2c_2019:5115548
prad_su2c_2019:96115206
prad_su2c_2019:96115630
prad_su2c_2019:9115063
prad_su2c_2019:9115520
prad_su2c_2019:96115619
prad_su2c_2019:96115498
prad_su2c_2019:5115409
prad_su2c_2019:9115174
prad_su2c_2019:5115545
prad_su2c_2019:6115321
prad_su2c_2019:1115468
prad_su2c_2019:9115108
prad_su2c_2019:96115494
prad_su2c_2019:6115122
prad_su2c_2019:6115385
prad_su2c_2019:1115244
prad_su2c_2019:9115423
prad_su2c_2019:96115500
prad_su2c_2019:5115057
prad_su2c_2019:6115219
prad_su2c_2019:96115474
prad_su2c_2019:96115204
prad_su2c_2019:1115016
prad_su2c_2019:96115645
prad_su2c_2019:97115330
prad_su2c_2019:5115411
prad_su2c_2019:1115245
prad_su2c_2019:6115319
prad_su2c_2019:96115508
prad_su2c_2019:1115089
prad_su2c_2019:96115476
prad_su2c_2019:97115074
prad_su2c_2019:1115466
prad_su2c_2019:6115288
prad_su2c_2019:6115398
prad_su2c_2019:6115400
prad_su2c_2019:6115596
prad_su2c_2019:96115141
prad_su2c_2019:96115214
prad_su2c_2019:97115453
prad_su2c_2019:6115124
prad_su2c_2019:1115082
prad_su2c_2019:1115085
prad_su2c_2019:1115153
prad_su2c_2019:1115157
prad_su2c_2019:1115263
prad_su2c_2019:1115372
prad_su2c_2019:1115442
prad_su2c_2019:1115550
prad_su2c_2019:5115193
prad_su2c_2019:5115610
prad_su2c_2019:6115224
prad_su2c_2019:6115247
prad_su2c_2019:6115389
prad_su2c_2019:6115397
prad_su2c_2019:6115597
prad_su2c_2019:9115586
prad_su2c_2019:96115135
prad_su2c_2019:96115137
prad_su2c_2019:96115140
prad_su2c_2019:96115142
prad_su2c_2019:96115144
prad_su2c_2019:96115146
prad_su2c_2019:96115495
prad_su2c_2019:96115496
prad_su2c_2019:6115320
prad_su2c_2019:9115552
prad_su2c_2019:9115524
prad_su2c_2019:1115190
prad_su2c_2019:6115595
prad_su2c_2019:5115197
prad_su2c_2019:96115143
prad_su2c_2019:9115324
prad_su2c_2019:9115575
prad_su2c_2019:9115522
prad_su2c_2019:6115381
prad_su2c_2019:1115091
prad_su2c_2019:1115307
prad_su2c_2019:1115544
prad_su2c_2019:5115024
prad_su2c_2019:5115032
prad_su2c_2019:5115258
prad_su2c_2019:6115120
prad_su2c_2019:6115317
prad_su2c_2019:6115382
prad_su2c_2019:6115600
prad_su2c_2019:9115055
prad_su2c_2019:9115061
prad_su2c_2019:9115175
prad_su2c_2019:9115341
prad_su2c_2019:9115551
prad_su2c_2019:13115379
prad_su2c_2019:96115479
prad_su2c_2019:96115480
prad_su2c_2019:96115482
prad_su2c_2019:96115490
prad_su2c_2019:97115006
prad_su2c_2019:97115365
prad_su2c_2019:1115310
prad_mcspc_mskcc_2020:P-0021482
prad_mcspc_mskcc_2020:P-0012030
prad_mcspc_mskcc_2020:P-0013000
prad_mcspc_mskcc_2020:P-0016405
prad_mcspc_mskcc_2020:P-0017754
prad_mcspc_mskcc_2020:P-0020847
prad_mcspc_mskcc_2020:P-0021728
prad_mcspc_mskcc_2020:P-0029028
prad_mcspc_mskcc_2020:P-0031769
prad_mcspc_mskcc_2020:P-0009006
prad_mcspc_mskcc_2020:P-0028167
prad_mcspc_mskcc_2020:P-0020792
prad_mcspc_mskcc_2020:P-0016450
prad_mcspc_mskcc_2020:P-0030580
prad_mcspc_mskcc_2020:P-0022557
prad_mcspc_mskcc_2020:P-0026409
prad_mcspc_mskcc_2020:P-0029087
prad_mcspc_mskcc_2020:P-0023838
prad_mcspc_mskcc_2020:P-0030801
prad_mcspc_mskcc_2020:P-0000683
prad_mcspc_mskcc_2020:P-0005933
prad_mcspc_mskcc_2020:P-0007043
prad_mcspc_mskcc_2020:P-0012181
prad_mcspc_mskcc_2020:P-0014204
prad_mcspc_mskcc_2020:P-0014571
prad_mcspc_mskcc_2020:P-0022406
prad_mcspc_mskcc_2020:P-0026855
prad_mcspc_mskcc_2020:P-0014076
prad_mcspc_mskcc_2020:P-0009399
prad_mcspc_mskcc_2020:P-0006692
prad_mcspc_mskcc_2020:P-0029523
prad_mcspc_mskcc_2020:P-0024249
prad_mcspc_mskcc_2020:P-0033226
prad_mcspc_mskcc_2020:P-0009044
prad_mcspc_mskcc_2020:P-0000888
prad_mcspc_mskcc_2020:P-0005649
prad_mcspc_mskcc_2020:P-0001128
prad_mcspc_mskcc_2020:P-0001153
prad_mcspc_mskcc_2020:P-0002123
prad_mcspc_mskcc_2020:P-0002431
prad_mcspc_mskcc_2020:P-0003519
prad_mcspc_mskcc_2020:P-0003538
prad_mcspc_mskcc_2020:P-0003799
prad_mcspc_mskcc_2020:P-0003939
prad_mcspc_mskcc_2020:P-0005098
prad_mcspc_mskcc_2020:P-0005217
prad_mcspc_mskcc_2020:P-0006057
prad_mcspc_mskcc_2020:P-0006595
prad_mcspc_mskcc_2020:P-0006603
prad_mcspc_mskcc_2020:P-0006815
prad_mcspc_mskcc_2020:P-0007219
prad_mcspc_mskcc_2020:P-0007359
prad_mcspc_mskcc_2020:P-0007629
prad_mcspc_mskcc_2020:P-0007749
prad_mcspc_mskcc_2020:P-0008077
prad_mcspc_mskcc_2020:P-0008330
prad_mcspc_mskcc_2020:P-0008869
prad_mcspc_mskcc_2020:P-0009640
prad_mcspc_mskcc_2020:P-0009787
prad_mcspc_mskcc_2020:P-0009989
prad_mcspc_mskcc_2020:P-0010034
prad_mcspc_mskcc_2020:P-0012555
prad_mcspc_mskcc_2020:P-0013037
prad_mcspc_mskcc_2020:P-0013115
prad_mcspc_mskcc_2020:P-0013674
prad_mcspc_mskcc_2020:P-0014530
prad_mcspc_mskcc_2020:P-0015767
prad_mcspc_mskcc_2020:P-0017041
prad_mcspc_mskcc_2020:P-0017548
prad_mcspc_mskcc_2020:P-0017892
prad_mcspc_mskcc_2020:P-0018798
prad_mcspc_mskcc_2020:P-0020023
prad_mcspc_mskcc_2020:P-0020424
prad_mcspc_mskcc_2020:P-0020750
prad_mcspc_mskcc_2020:P-0021874
prad_mcspc_mskcc_2020:P-0022439
prad_mcspc_mskcc_2020:P-0022672
prad_mcspc_mskcc_2020:P-0022700
prad_mcspc_mskcc_2020:P-0022825
prad_mcspc_mskcc_2020:P-0023249
prad_mcspc_mskcc_2020:P-0023276
prad_mcspc_mskcc_2020:P-0023874
prad_mcspc_mskcc_2020:P-0024140
prad_mcspc_mskcc_2020:P-0024316
prad_mcspc_mskcc_2020:P-0024522
prad_mcspc_mskcc_2020:P-0024600
prad_mcspc_mskcc_2020:P-0024898
prad_mcspc_mskcc_2020:P-0025150
prad_mcspc_mskcc_2020:P-0025494
prad_mcspc_mskcc_2020:P-0025759
prad_mcspc_mskcc_2020:P-0026237
prad_mcspc_mskcc_2020:P-0026808
prad_mcspc_mskcc_2020:P-0027160
prad_mcspc_mskcc_2020:P-0027245
prad_mcspc_mskcc_2020:P-0027453
prad_mcspc_mskcc_2020:P-0027466
prad_mcspc_mskcc_2020:P-0027874
prad_mcspc_mskcc_2020:P-0028551
prad_mcspc_mskcc_2020:P-0029645
prad_mcspc_mskcc_2020:P-0031771
prad_mskcc:PCA0160
prad_mskcc:PCA0013
prad_mskcc:PCA0208
prad_mskcc:PCA0128
prad_mskcc:PCA0180
prad_mskcc:PCA0215
prad_mskcc:PCA0194
prad_mskcc:PCA0189
prad_mskcc:PCA0092
prad_mskcc:PCA0054
prad_mskcc:PCA0173
prad_mskcc:PCA0207
prad_mskcc:PCA0184
prad_mskcc:PCA0171
prad_mskcc:PCA0005
prad_mskcc:PCA0021
prad_mskcc:PCA0087
prad_mskcc:PCA0002
prad_mskcc:PCA0020
prad_mskcc:PCA0032
prad_mskcc:PCA0081
prostate_dkfz_2018:ICGC_PCA001
prostate_dkfz_2018:ICGC_PCA105
prostate_dkfz_2018:ICGC_PCA002
prostate_dkfz_2018:ICGC_PCA033
prostate_dkfz_2018:CPCG0190
prostate_dkfz_2018:ICGC_PCA044
prostate_dkfz_2018:ICGC_PCA007
prostate_dkfz_2018:ICGC_PCA008
prostate_dkfz_2018:ICGC_PCA049
prostate_dkfz_2018:ICGC_PCA035
prostate_dkfz_2018:ICGC_PCA006
prostate_dkfz_2018:ICGC_PCA031
prostate_dkfz_2018:ICGC_PCA042
prostate_dkfz_2018:ICGC_PCA062
prostate_dkfz_2018:ICGC_PCA073
prostate_dkfz_2018:ICGC_PCAL16
prostate_dkfz_2018:ICGC_PCAL20
prostate_dkfz_2018:ICGC_PCAL21
prostate_dkfz_2018:ICGC_PCAL33
prostate_dkfz_2018:ICGC_PCAL47
prostate_dkfz_2018:ICGC_PCA081
prostate_dkfz_2018:ICGC_PCA153
prostate_dkfz_2018:ICGC_PCA161
prostate_dkfz_2018:ICGC_PCA177
nepc_wcm_2016:WCMC119
nepc_wcm_2016:WCMC0
nepc_wcm_2016:WCMC91
nepc_wcm_2016:WCMC158
nepc_wcm_2016:WCMC161
nepc_wcm_2016:WCMC164
nepc_wcm_2016:WCMC192
nepc_wcm_2016:WCMC1
nepc_wcm_2016:WCMC156
nepc_wcm_2016:WCMC201
nepc_wcm_2016:WCMC207
nepc_wcm_2016:WCMC7520
nepc_wcm_2016:WCMC7951
nepc_wcm_2016:WCMC10361
nepc_wcm_2016:WCMC10362
nepc_wcm_2016:WCMC20870
nepc_wcm_2016:WCMC21016

## Sheet: MDA PCa 2b
1 alteration the same	2-4 alterations the same	5-6 alterations the same
prad_tcga:TCGA-XK-AAJT	prad_tcga:TCGA-EJ-5517	prad_su2c_2019:prad_tcga:TCGA-EJ-5517
prad_tcga:TCGA-CH-5767	prad_tcga:TCGA-VP-A875	prad_su2c_2019:prad_tcga:TCGA-VP-A875
prad_tcga:TCGA-G9-6377	prad_tcga:TCGA-XK-AAJP
prad_tcga:TCGA-J9-A8CN	prad_tcga:TCGA-J9-A52D
prad_tcga:TCGA-KC-A4BN	prad_tcga:TCGA-KK-A6E4
prad_tcga:TCGA-Y6-A8TL	prad_tcga:TCGA-G9-7525
prad_tcga:TCGA-EJ-A65D	prad_tcga:TCGA-J4-A67S
prad_tcga:TCGA-YL-A8SC	prad_tcga:TCGA-XK-AAK1
prad_tcga:TCGA-G9-6379	prad_tcga:TCGA-G9-6366
prad_tcga:TCGA-J4-A67T	prad_tcga:TCGA-G9-6369
prad_tcga:TCGA-ZG-A9LS	prad_tcga:TCGA-XK-AAIW
prad_tcga:TCGA-EJ-5519	prad_tcga:TCGA-CH-5788
prad_tcga:TCGA-KC-A7F5	prad_tcga:TCGA-EJ-7330
prad_tcga:TCGA-QU-A6IN	prad_tcga:TCGA-EJ-7781
prad_tcga:TCGA-2A-AAYF	prad_tcga:TCGA-EJ-7786
prad_tcga:TCGA-HC-A6AN	prad_tcga:TCGA-WW-A8ZI
prad_tcga:TCGA-EJ-A65G	prad_tcga:TCGA-XJ-A83G
prad_tcga:TCGA-J4-AAU2	prad_tcga:TCGA-HC-7212
prad_tcga:TCGA-TP-A8TV	prad_tcga:TCGA-HC-7748
prad_tcga:TCGA-V1-A9OQ	prad_tcga:TCGA-EJ-5525
prad_tcga:TCGA-VN-A88O	prad_tcga:TCGA-EJ-5530
prad_tcga:TCGA-4L-AA1F	prad_tcga:TCGA-EJ-7783
prad_tcga:TCGA-2A-A8VX	prad_tcga:TCGA-CH-5761
prad_tcga:TCGA-EJ-5505	prad_tcga:TCGA-2A-A8VT
prad_tcga:TCGA-YL-A8S8	prad_tcga:TCGA-EJ-7785
prad_tcga:TCGA-CH-5748	prad_tcga:TCGA-HC-7230
prad_tcga:TCGA-EJ-5532	prad_tcga:TCGA-CH-5737
prad_tcga:TCGA-EJ-7218	prad_tcga:TCGA-EJ-5518
prad_tcga:TCGA-EJ-7794	prad_tcga:TCGA-CH-5752
prad_tcga:TCGA-EJ-8468	prad_msk_stopsack_2021:P-0003945
prad_tcga:TCGA-VP-A87B	prad_msk_stopsack_2021:P-0000755
prad_tcga:TCGA-YL-A8SO	prad_msk_stopsack_2021:P-0008461
prad_tcga:TCGA-J9-A8CP	prad_msk_stopsack_2021:P-0014701
prad_tcga:TCGA-FC-A8O0	prad_msk_stopsack_2021:P-0035133
prad_tcga:TCGA-ZG-A9L2	prad_msk_stopsack_2021:P-0030383
prad_tcga:TCGA-FC-7708	prad_mskcc_2017:P-0000755
prad_tcga:TCGA-EJ-7782	prad_mskcc_2017:P-0004910
prad_tcga:TCGA-EJ-5514	prad_mskcc_2017:P-0008461
prad_tcga:TCGA-HC-7744	prad_p1000:SC_9006
prad_tcga:TCGA-CH-5765	prad_p1000:12729
prad_tcga:TCGA-CH-5790	prad_p1000:TCGA-XK-AAIW
prad_tcga:TCGA-J4-A67O	prad_cdk12_mskcc_2020:P-0003945
prad_tcga:TCGA-KK-A7AW	prad_cdk12_mskcc_2020:P-0008461
prad_tcga:TCGA-QU-A6IO	prad_cdk12_mskcc_2020:P-0014701
prad_tcga:TCGA-FC-7961	prad_pik3r1_msk_2021:P-0008461
prad_tcga:TCGA-KK-A8I8	prad_pik3r1_msk_2021:P-0014701
prad_tcga:TCGA-XQ-A8TA	prad_pik3r1_msk_2021:P-0055684
prad_tcga:TCGA-KK-A7AP	prad_su2c_2019:5115128
prad_tcga:TCGA-VP-A87J	prad_su2c_2019:5115261
prad_tcga:TCGA-VN-A88Q	prad_su2c_2019:9115109
prad_tcga:TCGA-EJ-8472	prad_su2c_2019:97115358
prad_tcga:TCGA-HC-7736	prad_su2c_2019:5115290
prad_tcga:TCGA-YL-A8SR	prad_su2c_2019:5115073
prad_tcga:TCGA-KK-A6E3	prad_su2c_2019:5115022
prad_tcga:TCGA-EJ-7312	prad_su2c_2019:5115033
prad_tcga:TCGA-EJ-7318	prad_su2c_2019:9115102
prad_tcga:TCGA-EJ-7325	prad_su2c_2019:9115052
prad_tcga:TCGA-G9-6343	prad_su2c_2019:97115278
prad_tcga:TCGA-G9-6354	prad_su2c_2019:5115030
prad_tcga:TCGA-G9-7519	prad_su2c_2019:5115613
prad_tcga:TCGA-QU-A6IL	prad_su2c_2019:97115363
prad_tcga:TCGA-VN-A88N	prad_su2c_2019:9115104
prad_tcga:TCGA-HC-A8CY	prad_su2c_2019:97115167
prad_tcga:TCGA-CH-5751	prad_su2c_2019:5115196
prad_tcga:TCGA-HC-7081	prad_su2c_2019:5115160
prad_tcga:TCGA-EJ-7327	prad_su2c_2019:9115065
prad_tcga:TCGA-EJ-7125	prad_su2c_2019:97115560
prad_tcga:TCGA-YJ-A8SW	prad_su2c_2019:9115339
prad_tcga:TCGA-EJ-7789	prad_su2c_2019:13115277
prad_tcga:TCGA-EJ-5495	prad_su2c_2019:5115130
prad_tcga:TCGA-CH-5753	prad_su2c_2019:5115650
prad_tcga:TCGA-EJ-7331	prad_su2c_2019:9115522
prad_tcga:TCGA-HC-7211	prad_su2c_2019:5115023
prad_tcga:TCGA-VP-A87K	prad_su2c_2019:9115420
prad_tcga:TCGA-YL-A8SQ	prad_su2c_2019:5115256
prad_tcga:TCGA-CH-5740	prad_su2c_2019:9115580
prad_tcga:TCGA-KK-A8I6	prad_su2c_2019:97115563
prad_tcga:TCGA-V1-A9Z9	prad_su2c_2019:9115519
prad_tcga:TCGA-CH-5741	prad_su2c_2019:5115152
prad_tcga:TCGA-G9-6339	prad_su2c_2019:9115568
prad_tcga:TCGA-VP-A872	prad_su2c_2019:5115187
prad_tcga:TCGA-HC-A6AL	prad_su2c_2019:5115078
prad_tcga:TCGA-KK-A6E1	prad_su2c_2019:5115057
prad_tcga:TCGA-KK-A6E7	prad_su2c_2019:9115108
prad_tcga:TCGA-EJ-7791	prad_su2c_2019:9115516
prad_tcga:TCGA-KC-A4BV	prad_su2c_2019:9115325
prad_tcga:TCGA-G9-6496	prad_su2c_2019:9115063
prad_tcga:TCGA-G9-6338	prad_su2c_2019:9115171
prad_tcga:TCGA-KC-A7FA	prad_su2c_2019:9115524
prad_tcga:TCGA-KC-A7FD	prad_su2c_2019:97115558
prad_tcga:TCGA-KK-A6E8	prad_su2c_2019:97115007
prad_msk_stopsack_2021:P-0045146	prad_su2c_2019:97115079
prad_msk_stopsack_2021:P-0003758	prad_su2c_2019:97115281
prad_msk_stopsack_2021:P-0029339	prad_su2c_2019:97115005
prad_msk_stopsack_2021:P-0004910	prad_su2c_2019:97115151
prad_msk_stopsack_2021:P-0007533	prad_su2c_2019:97115337
prad_msk_stopsack_2021:P-0001446	prad_su2c_2019:9115185
prad_msk_stopsack_2021:P-0018607	prad_su2c_2019:9115051
prad_msk_stopsack_2021:P-0048490	prad_su2c_2019:9115416
prad_msk_stopsack_2021:P-0049144	prad_su2c_2019:9115515
prad_msk_stopsack_2021:P-0003450	prad_su2c_2019:9115111
prad_msk_stopsack_2021:P-0009402	prad_su2c_2019:97115454
prad_msk_stopsack_2021:P-0014009	prad_mskcc:PCA0135
prad_msk_stopsack_2021:P-0014408	prad_mskcc:PCA0058
prad_msk_stopsack_2021:P-0015991	prad_mskcc:PCA0084
prad_msk_stopsack_2021:P-0023741	prad_mskcc:PCA0134
prad_msk_stopsack_2021:P-0031856	prad_mskcc:PCA0141
prad_msk_stopsack_2021:P-0042035	prad_mskcc:PCA0144
prad_msk_stopsack_2021:P-0001884	prad_mskcc:PCA0168
prad_msk_stopsack_2021:P-0017169	prad_mskcc:PCA0173
prad_msk_stopsack_2021:P-0023839	prad_mskcc:PCA0209
prad_msk_stopsack_2021:P-0016538	prad_mskcc:PCA0018
prad_msk_stopsack_2021:P-0034289	prad_mskcc:PCA0182
prad_msk_stopsack_2021:P-0025676	prad_mskcc:PCA0020
prad_msk_stopsack_2021:P-0003101	prad_mskcc:PCA0012
prad_msk_stopsack_2021:P-0026409	prad_mskcc:PCA0025
prad_msk_stopsack_2021:P-0018315	prad_mskcc:PCA0035
prad_msk_stopsack_2021:P-0018605	prad_mskcc:PCA0036
prad_msk_stopsack_2021:P-0020792	prad_mskcc:PCA0052
prad_msk_stopsack_2021:P-0024538	prad_mskcc:PCA0068
prad_msk_stopsack_2021:P-0027210	prad_mskcc:PCA0082
prad_msk_stopsack_2021:P-0039234	prad_mskcc:PCA0126
prad_msk_stopsack_2021:P-0050289	prad_mskcc:PCA0147
prad_msk_stopsack_2021:P-0050196	prad_mskcc:PCA0156
prad_msk_stopsack_2021:P-0008098	prad_mskcc:PCA0167
prad_msk_stopsack_2021:P-0015345	prad_mskcc:PCA0187
prad_msk_stopsack_2021:P-0000441	prad_mskcc:PCA0206
prad_msk_stopsack_2021:P-0001071	prad_mskcc:PCA0210
prad_msk_stopsack_2021:P-0001774	prad_mskcc:PCA0215
prad_msk_stopsack_2021:P-0004448	prad_mskcc:PCA0193
prad_msk_stopsack_2021:P-0004489	prad_mskcc:PCA0194
prad_msk_stopsack_2021:P-0004704	prad_mskcc:PCA0038
prad_msk_stopsack_2021:P-0005344	prad_mskcc:PCA0184
prad_msk_stopsack_2021:P-0005374	prostate_dkfz_2018:ICGC_PCA084
prad_msk_stopsack_2021:P-0005428
prad_msk_stopsack_2021:P-0008315
prad_msk_stopsack_2021:P-0010382
prad_msk_stopsack_2021:P-0011155
prad_msk_stopsack_2021:P-0011290
prad_msk_stopsack_2021:P-0011368
prad_msk_stopsack_2021:P-0016883
prad_msk_stopsack_2021:P-0021355
prad_msk_stopsack_2021:P-0021561
prad_msk_stopsack_2021:P-0021928
prad_msk_stopsack_2021:P-0023170
prad_msk_stopsack_2021:P-0023405
prad_msk_stopsack_2021:P-0024660
prad_msk_stopsack_2021:P-0030625
prad_msk_stopsack_2021:P-0032212
prad_msk_stopsack_2021:P-0041059
prad_msk_stopsack_2021:P-0044808
prad_msk_stopsack_2021:P-0044927
prad_msk_stopsack_2021:P-0046590
prad_msk_stopsack_2021:P-0047211
prad_msk_stopsack_2021:P-0027593
prad_msk_stopsack_2021:P-0014076
prad_msk_stopsack_2021:P-0012928
prad_msk_stopsack_2021:P-0021600
prad_msk_stopsack_2021:P-0042711
prad_msk_stopsack_2021:P-0001297
prad_msk_stopsack_2021:P-0004474
prad_msk_stopsack_2021:P-0008655
prad_msk_stopsack_2021:P-0018489
prad_msk_stopsack_2021:P-0022179
prad_msk_stopsack_2021:P-0027197
prad_msk_stopsack_2021:P-0034070
prad_msk_stopsack_2021:P-0034876
prad_msk_stopsack_2021:P-0035809
prad_msk_stopsack_2021:P-0042174
prad_msk_stopsack_2021:P-0001426
prad_msk_stopsack_2021:P-0031712
prad_msk_stopsack_2021:P-0035818
prad_msk_stopsack_2021:P-0002901
prad_msk_stopsack_2021:P-0034845
prad_msk_stopsack_2021:P-0032288
prad_msk_stopsack_2021:P-0010034
prad_msk_stopsack_2021:P-0015570
prad_msk_stopsack_2021:P-0043336
prad_msk_stopsack_2021:P-0025952
prad_msk_stopsack_2021:P-0015813
prad_msk_stopsack_2021:P-0006997
prad_msk_stopsack_2021:P-0007411
prad_msk_stopsack_2021:P-0011088
prad_msk_stopsack_2021:P-0013339
prad_msk_stopsack_2021:P-0014613
prad_msk_stopsack_2021:P-0015264
prad_msk_stopsack_2021:P-0017494
prad_msk_stopsack_2021:P-0024249
prad_msk_stopsack_2021:P-0024488
prad_msk_stopsack_2021:P-0027036
prad_msk_stopsack_2021:P-0027245
prad_msk_stopsack_2021:P-0029260
prad_msk_stopsack_2021:P-0034897
prad_msk_stopsack_2021:P-0036164
prad_msk_stopsack_2021:P-0038328
prad_msk_stopsack_2021:P-0040334
prad_msk_stopsack_2021:P-0040838
prad_msk_stopsack_2021:P-0043565
prad_msk_stopsack_2021:P-0047475
prad_msk_stopsack_2021:P-0049601
prad_msk_stopsack_2021:P-0001325
prad_msk_stopsack_2021:P-0029164
prad_msk_stopsack_2021:P-0031135
prad_msk_stopsack_2021:P-0039351
prad_msk_stopsack_2021:P-0042830
prad_msk_stopsack_2021:P-0037127
prad_msk_stopsack_2021:P-0049607
prad_mskcc_2017:P-0003758
prad_mskcc_2017:P-0001325
prad_mskcc_2017:P-0002901
prad_mskcc_2017:P-0003101
prad_mskcc_2017:P-0001426
prad_mskcc_2017:P-0006029
prad_mskcc_2017:P-0006997
prad_mskcc_2017:P-0001446
prad_mskcc_2017:P-0000966
prad_mskcc_2017:P-0003450
prad_mskcc_2017:P-0001884
prad_mskcc_2017:P-0000441
prad_mskcc_2017:P-0001071
prad_mskcc_2017:P-0001774
prad_mskcc_2017:P-0003597
prad_mskcc_2017:P-0004448
prad_mskcc_2017:P-0004489
prad_mskcc_2017:P-0004704
prad_mskcc_2017:P-0005344
prad_mskcc_2017:P-0005374
prad_mskcc_2017:P-0005428
prad_mskcc_2017:P-0008098
prad_mskcc_2017:P-0008315
prad_mskcc_2017:P-0001297
prad_mskcc_2017:P-0008655
prad_p1000:07-042H2_LN
prad_p1000:08-037F1_LIVER
prad_p1000:12-021H4_LIVER
prad_p1000:SC_9128
prad_p1000:12728
prad_p1000:SC_9094
prad_p1000:PM156
prad_p1000:TCGA-KK-A6E7
prad_p1000:AAPC-STID0000015908-Tumor-SM-2XU1U
prad_p1000:SC_9017
prad_p1000:TCGA-KK-A8I8
prad_p1000:24290
prad_p1000:PROS01448-6115219-SM-67ERS
prad_p1000:SC_9046
prad_p1000:PRAD-6115398.0-SM-7LGUK
prad_p1000:PROS10448-SUTC.01115082-SM-4JC6B
prad_p1000:PROS10448-SUTC.01115092-SM-4JC74
prad_p1000:MO_1241
prad_p1000:SC_9029
prad_p1000:SC_9058
prad_p1000:SC_9132
prad_p1000:SC_9073
prad_p1000:SC_9097
prad_p1000:TP_2010
prad_p1000:SC_9121
prad_p1000:SC_9081
prad_p1000:05-011G4_LUNG
prad_p1000:06-134H1_LN
prad_p1000:PROS01448-6115227-SM-67ERU
prad_p1000:PROS10448-SUTC.01115081-SM-4JC6A
prad_p1000:PROS11496-6115236-SM-6CNPW
prad_p1000:PROS12319B-SU2C-06115117-SM-4W2NC
prad_p1000:SC_9011
prad_p1000:TP_2032
prad_p1000:01-087MM_BONE
prad_p1000:MO_1040
prad_p1000:MO_1132
prad_p1000:MO_1139
prad_p1000:MO_1184
prad_p1000:MO_1316
prad_p1000:MO_1447
prad_p1000:PROS01448-DFCI.10-448.P29-SM-5CQ4S
prad_p1000:PROS01448-1115161-SM-5SGU1
prad_p1000:PROS01448-1115244-SM-5SGU6
prad_p1000:PROS01448-6115250-SM-67ES4
prad_p1000:PROS10448-SUTC.01115084-SM-4JC6H
prad_p1000:PROS11496-6115320-SM-6CNQ4
prad_p1000:PROS11496-6115321-SM-6CNQ5
prad_p1000:PROS12319B-SU2C-06115114-SM-4W2N9
prad_p1000:SC_9007
prad_p1000:SC_9056
prad_p1000:SC_9065
prad_p1000:SC_9145
prad_p1000:TP_2060
prad_p1000:11040
prad_p1000:MO_1084
prad_p1000:TP_2034
prad_p1000:AAPC-STID0000003057-Tumor-SM-2XTZT
prad_p1000:SC_9144
prad_p1000:SC_9165
prad_p1000:TCGA-FC-A8O0
prad_p1000:TCGA-VP-A875
prad_p1000:05-165O_ADRENAL
prad_p1000:PROS01448-6115234-SM-67ERX
prad_p1000:TCGA-KK-A7AP
prad_p1000:TCGA-YL-A8SQ
prad_p1000:03-163S4_LIVER
prad_p1000:P04-1790
prad_p1000:P06-3676
prad_p1000:PR-02-254
prad_p1000:PRAD-01115263-SM-6WZF9
prad_p1000:PRAD-6115393.0-SM-7LGUF
prad_p1000:SC_9130
prad_p1000:SC_9163
prad_p1000:TCGA-CH-5740
prad_p1000:TCGA-EJ-A65D
prad_p1000:TCGA-KK-A8I6
prad_p1000:TCGA-V1-A9Z9
prad_p1000:TCGA-G9-6366
prad_p1000:PM14
prad_p1000:TCGA-CH-5737
prad_p1000:MO_1012
prad_cdk12_mskcc_2020:P-0002901
prad_cdk12_mskcc_2020:P-0031135
prad_cdk12_mskcc_2020:P-0029339
prad_cdk12_mskcc_2020:P-0025676
prad_cdk12_mskcc_2020:P-0027593
prad_cdk12_mskcc_2020:P-0001426
prad_cdk12_mskcc_2020:P-0026409
prad_cdk12_mskcc_2020:P-0031712
prad_cdk12_mskcc_2020:P-0001446
prad_cdk12_mskcc_2020:P-0008960
prad_cdk12_mskcc_2020:P-0000966
prad_cdk12_mskcc_2020:P-0012104
prad_cdk12_mskcc_2020:P-0018315
prad_cdk12_mskcc_2020:P-0018605
prad_cdk12_mskcc_2020:P-0020792
prad_cdk12_mskcc_2020:P-0024538
prad_cdk12_mskcc_2020:P-0027210
prad_cdk12_mskcc_2020:P-0011377
prad_cdk12_mskcc_2020:P-0014076
prad_cdk12_mskcc_2020:P-0018607
prad_cdk12_mskcc_2020:P-0003101
prad_cdk12_mskcc_2020:P-0016538
prad_cdk12_mskcc_2020:P-0006029
prad_cdk12_mskcc_2020:P-0006997
prad_cdk12_mskcc_2020:P-0007411
prad_cdk12_mskcc_2020:P-0011088
prad_cdk12_mskcc_2020:P-0013339
prad_cdk12_mskcc_2020:P-0014613
prad_cdk12_mskcc_2020:P-0015813
prad_cdk12_mskcc_2020:P-0017494
prad_cdk12_mskcc_2020:P-0024249
prad_cdk12_mskcc_2020:P-0027036
prad_cdk12_mskcc_2020:P-0027245
prad_cdk12_mskcc_2020:P-0029260
prad_cdk12_mskcc_2020:P-0013036
prad_cdk12_mskcc_2020:P-0023855
prad_cdk12_mskcc_2020:P-0003450
prad_cdk12_mskcc_2020:P-0009402
prad_cdk12_mskcc_2020:P-0014009
prad_cdk12_mskcc_2020:P-0014408
prad_cdk12_mskcc_2020:P-0015991
prad_cdk12_mskcc_2020:P-0023741
prad_cdk12_mskcc_2020:P-0001884
prad_cdk12_mskcc_2020:P-0017169
prad_cdk12_mskcc_2020:P-0023839
prad_cdk12_mskcc_2020:P-0000441
prad_cdk12_mskcc_2020:P-0004448
prad_cdk12_mskcc_2020:P-0004489
prad_cdk12_mskcc_2020:P-0004704
prad_cdk12_mskcc_2020:P-0005344
prad_cdk12_mskcc_2020:P-0005374
prad_cdk12_mskcc_2020:P-0005428
prad_cdk12_mskcc_2020:P-0007137
prad_cdk12_mskcc_2020:P-0008098
prad_cdk12_mskcc_2020:P-0008315
prad_cdk12_mskcc_2020:P-0008339
prad_cdk12_mskcc_2020:P-0011290
prad_cdk12_mskcc_2020:P-0011368
prad_cdk12_mskcc_2020:P-0013808
prad_cdk12_mskcc_2020:P-0014566
prad_cdk12_mskcc_2020:P-0015345
prad_cdk12_mskcc_2020:P-0016883
prad_cdk12_mskcc_2020:P-0019933
prad_cdk12_mskcc_2020:P-0021561
prad_cdk12_mskcc_2020:P-0021928
prad_cdk12_mskcc_2020:P-0023170
prad_cdk12_mskcc_2020:P-0030625
prad_cdk12_mskcc_2020:P-0031808
prad_cdk12_mskcc_2020:P-0032212
prad_cdk12_mskcc_2020:P-0001297
prad_cdk12_mskcc_2020:P-0008655
prad_cdk12_mskcc_2020:P-0018489
prad_cdk12_mskcc_2020:P-0022179
prad_pik3r1_msk_2021:P-0045146
prad_pik3r1_msk_2021:P-0025676
prad_pik3r1_msk_2021:P-0002901
prad_pik3r1_msk_2021:P-0054506
prad_pik3r1_msk_2021:P-0031135
prad_pik3r1_msk_2021:P-0031579
prad_pik3r1_msk_2021:P-0018607
prad_pik3r1_msk_2021:P-0009402
prad_pik3r1_msk_2021:P-0014408
prad_pik3r1_msk_2021:P-0015991
prad_pik3r1_msk_2021:P-0023741
prad_pik3r1_msk_2021:P-0031856
prad_pik3r1_msk_2021:P-0042035
prad_pik3r1_msk_2021:P-0047316
prad_pik3r1_msk_2021:P-0049144
prad_pik3r1_msk_2021:P-0001884
prad_pik3r1_msk_2021:P-0023380
prad_pik3r1_msk_2021:P-0031189
prad_pik3r1_msk_2021:P-0016538
prad_pik3r1_msk_2021:P-0034289
prad_pik3r1_msk_2021:P-0003101
prad_pik3r1_msk_2021:P-0018605
prad_pik3r1_msk_2021:P-0020792
prad_pik3r1_msk_2021:P-0024538
prad_pik3r1_msk_2021:P-0027210
prad_pik3r1_msk_2021:P-0039234
prad_pik3r1_msk_2021:P-0050289
prad_pik3r1_msk_2021:P-0000441
prad_pik3r1_msk_2021:P-0004448
prad_pik3r1_msk_2021:P-0004489
prad_pik3r1_msk_2021:P-0004704
prad_pik3r1_msk_2021:P-0005344
prad_pik3r1_msk_2021:P-0005428
prad_pik3r1_msk_2021:P-0008098
prad_pik3r1_msk_2021:P-0008315
prad_pik3r1_msk_2021:P-0011290
prad_pik3r1_msk_2021:P-0011368
prad_pik3r1_msk_2021:P-0014566
prad_pik3r1_msk_2021:P-0015345
prad_pik3r1_msk_2021:P-0016883
prad_pik3r1_msk_2021:P-0019933
prad_pik3r1_msk_2021:P-0021928
prad_pik3r1_msk_2021:P-0023170
prad_pik3r1_msk_2021:P-0030625
prad_pik3r1_msk_2021:P-0032212
prad_pik3r1_msk_2021:P-0041059
prad_pik3r1_msk_2021:P-0044808
prad_pik3r1_msk_2021:P-0050888
prad_pik3r1_msk_2021:P-0056098
prad_pik3r1_msk_2021:P-0014076
prad_pik3r1_msk_2021:P-0051484
prad_pik3r1_msk_2021:P-0001297
prad_pik3r1_msk_2021:P-0008655
prad_pik3r1_msk_2021:P-0018489
prad_pik3r1_msk_2021:P-0042174
prad_pik3r1_msk_2021:P-0055314
prad_pik3r1_msk_2021:P-0001426
prad_pik3r1_msk_2021:P-0031712
prad_pik3r1_msk_2021:P-0006997
prad_pik3r1_msk_2021:P-0007411
prad_pik3r1_msk_2021:P-0011088
prad_pik3r1_msk_2021:P-0013339
prad_pik3r1_msk_2021:P-0014613
prad_pik3r1_msk_2021:P-0027036
prad_pik3r1_msk_2021:P-0027245
prad_pik3r1_msk_2021:P-0034897
prad_pik3r1_msk_2021:P-0038328
prad_pik3r1_msk_2021:P-0041602
prad_pik3r1_msk_2021:P-0043565
prad_pik3r1_msk_2021:P-0049601
prad_pik3r1_msk_2021:P-0052415
prad_pik3r1_msk_2021:P-0054043
prad_pik3r1_msk_2021:P-0007006
prad_pik3r1_msk_2021:P-0013036
prad_pik3r1_msk_2021:P-0023855
prad_pik3r1_msk_2021:P-0040754
prad_su2c_2019:9115538
prad_su2c_2019:1115308
prad_su2c_2019:9115418
prad_su2c_2019:96115624
prad_su2c_2019:6115388
prad_su2c_2019:96115215
prad_su2c_2019:6115401
prad_su2c_2019:97115564
prad_su2c_2019:97115376
prad_su2c_2019:5115194
prad_su2c_2019:9115050
prad_su2c_2019:6115227
prad_su2c_2019:6115236
prad_su2c_2019:1115087
prad_su2c_2019:1115527
prad_su2c_2019:13115262
prad_su2c_2019:5115651
prad_su2c_2019:6115593
prad_su2c_2019:5115506
prad_su2c_2019:9115107
prad_su2c_2019:6115012
prad_su2c_2019:5115501
prad_su2c_2019:9115555
prad_su2c_2019:97115001
prad_su2c_2019:1115362
prad_su2c_2019:5115031
prad_su2c_2019:9115055
prad_su2c_2019:6115595
prad_su2c_2019:5115193
prad_su2c_2019:5115610
prad_su2c_2019:9115541
prad_su2c_2019:5115614
prad_su2c_2019:5115410
prad_su2c_2019:9115575
prad_su2c_2019:96115294
prad_su2c_2019:1115244
prad_su2c_2019:1115161
prad_su2c_2019:6115321
prad_su2c_2019:5115409
prad_su2c_2019:5115548
prad_su2c_2019:5115612
prad_su2c_2019:6115219
prad_su2c_2019:1115083
prad_su2c_2019:1115503
prad_su2c_2019:6115114
prad_su2c_2019:96115474
prad_su2c_2019:9115041
prad_su2c_2019:5115259
prad_su2c_2019:5115528
prad_su2c_2019:97115561
prad_su2c_2019:5115076
prad_su2c_2019:5115255
prad_su2c_2019:5115260
prad_su2c_2019:5115405
prad_su2c_2019:5115608
prad_su2c_2019:5115648
prad_su2c_2019:9115184
prad_su2c_2019:9115340
prad_su2c_2019:9115422
prad_su2c_2019:97115131
prad_su2c_2019:97115335
prad_su2c_2019:97115449
prad_su2c_2019:97115375
prad_su2c_2019:97115188
prad_su2c_2019:5115127
prad_su2c_2019:5115505
prad_su2c_2019:9115415
prad_su2c_2019:9115571
prad_su2c_2019:97115147
prad_su2c_2019:5115198
prad_su2c_2019:5115611
prad_su2c_2019:9115338
prad_su2c_2019:97115009
prad_su2c_2019:97115071
prad_su2c_2019:97115166
prad_su2c_2019:97115316
prad_su2c_2019:97115447
prad_su2c_2019:5115327
prad_su2c_2019:1115263
prad_su2c_2019:96115135
prad_su2c_2019:9115181
prad_su2c_2019:9115042
prad_su2c_2019:1115531
prad_su2c_2019:6115117
prad_su2c_2019:9115047
prad_su2c_2019:1115468
prad_su2c_2019:1115549
prad_su2c_2019:9115552
prad_su2c_2019:5115077
prad_su2c_2019:5115276
prad_su2c_2019:5115408
prad_su2c_2019:6115250
prad_su2c_2019:6115320
prad_su2c_2019:6115594
prad_su2c_2019:6115598
prad_su2c_2019:9115174
prad_su2c_2019:9115572
prad_su2c_2019:96115207
prad_su2c_2019:96115472
prad_su2c_2019:96115616
prad_su2c_2019:5115199
prad_su2c_2019:9115425
prad_su2c_2019:97115456
prad_su2c_2019:97115003
prad_su2c_2019:96115626
prad_su2c_2019:6115234
prad_su2c_2019:9115046
prad_su2c_2019:6115393
prad_su2c_2019:1115556
prad_su2c_2019:5115407
prad_mcspc_mskcc_2020:P-0026409
prad_mcspc_mskcc_2020:P-0020792
prad_mcspc_mskcc_2020:P-0008098
prad_mcspc_mskcc_2020:P-0001774
prad_mcspc_mskcc_2020:P-0024660
prad_mcspc_mskcc_2020:P-0014076
prad_mcspc_mskcc_2020:P-0012928
prad_mcspc_mskcc_2020:P-0018489
prad_mcspc_mskcc_2020:P-0010034
prad_mcspc_mskcc_2020:P-0029164
prad_mcspc_mskcc_2020:P-0031135
prad_mcspc_mskcc_2020:P-0025676
prad_mcspc_mskcc_2020:P-0025952
prad_mcspc_mskcc_2020:P-0001426
prad_mcspc_mskcc_2020:P-0006029
prad_mcspc_mskcc_2020:P-0006997
prad_mcspc_mskcc_2020:P-0012230
prad_mcspc_mskcc_2020:P-0024249
prad_mcspc_mskcc_2020:P-0012230
prad_mcspc_mskcc_2020:P-0024249
prad_mcspc_mskcc_2020:P-0027036
prad_mcspc_mskcc_2020:P-0027245
prad_mcspc_mskcc_2020:P-0013036
prad_mskcc:PCA0201
prad_mskcc:PCA0146
prad_mskcc:PCA0033
prad_mskcc:PCA0112
prad_mskcc:PCA0007
prad_mskcc:PCA0014
prad_mskcc:PCA0026
prad_mskcc:PCA0037
prad_mskcc:PCA0062
prad_mskcc:PCA0080
prad_mskcc:PCA0081
prad_mskcc:PCA0087
prad_mskcc:PCA0109
prad_mskcc:PCA0136
prad_mskcc:PCA0190
prad_mskcc:PCA0213
prad_mskcc:PCA0005
prad_mskcc:PCA0021
prad_mskcc:PCA0188
prad_mskcc:PCA0030
prad_mskcc:PCA0151
prad_mskcc:PCA0164
prad_mskcc:PCA0211
prad_mskcc:PCA0032
prad_mskcc:PCA0092
prad_mskcc:PCA0107
prad_mskcc:PCA0180
prad_mskcc:PCA0189
prad_mskcc:PCA0002
prad_mskcc:PCA0008
prad_mskcc:PCA0024
prad_mskcc:PCA0029
prad_mskcc:PCA0064
prad_mskcc:PCA0086
prad_mskcc:PCA0114
prad_mskcc:PCA0127
prad_mskcc:PCA0150
prad_mskcc:PCA0155
prad_mskcc:PCA0157
prad_mskcc:PCA0158
prad_mskcc:PCA0169
prad_mskcc:PCA0171
prostate_dkfz_2018:ICGC_PCA008
prostate_dkfz_2018:ICGC_PCA009
prostate_dkfz_2018:ICGC_PCA035
prostate_dkfz_2018:ICGC_PCA084
prostate_dkfz_2018:ICGC_PCA125
prostate_dkfz_2018:ICGC_PCA001
prostate_dkfz_2018:ICGC_PCA192
prostate_dkfz_2018:CPCG0048
nepc_wcm_2016:WCMC119
prostate_dkfz_2018:ICGC_PCAL15
prostate_dkfz_2018:ICGC_PCA174
prostate_dkfz_2018:ICGC_PCA153
prostate_dkfz_2018:ICGC_PCAL11
prostate_dkfz_2018:ICGC_PCA037
prostate_dkfz_2018:ICGC_PCA049
prostate_dkfz_2018:ICGC_PCA112
nepc_wcm_2016:WCMC90
nepc_wcm_2016:WCMC158
nepc_wcm_2016:WCMC162
nepc_wcm_2016:WCMC183
nepc_wcm_2016:WCMC185
nepc_wcm_2016:WCMC11040
nepc_wcm_2016:WCMC221
nepc_wcm_2016:WCMC14
nepc_wcm_2016:WCMC21014

## Sheet: DU145
1 alteration the same	2-4 alterations the same	5-6 alterations the same
prad_tcga:TCGA-KK-A8ID	prad_tcga:TCGA-CH-5752
prad_tcga:TCGA-HC-7211	prad_tcga:TCGA-EJ-5514
prad_tcga:TCGA-CH-5753	prad_tcga:TCGA-XK-AAIW
prad_tcga:TCGA-FC-A5OB	prad_tcga:TCGA-HC-7738
prad_tcga:TCGA-YL-A8SC	prad_tcga:TCGA-ZG-A9LB
prad_tcga:TCGA-FC-A4JI	prad_tcga:TCGA-KK-A6DY
prad_tcga:TCGA-VP-A87J	prad_tcga:TCGA-KK-A59V
prad_tcga:TCGA-YL-A8SP	prad_tcga:TCGA-G9-7510
prad_tcga:TCGA-M7-A725	prad_tcga:TCGA-HC-8264
prad_tcga:TCGA-EJ-5526	prad_tcga:TCGA-HC-A9TH
prad_tcga:TCGA-EJ-5515	prad_tcga:TCGA-G9-A9S0
prad_tcga:TCGA-CH-5766	prad_tcga:TCGA-HC-8216
prad_tcga:TCGA-CH-5788	prad_msk_stopsack_2021:P-0010015
prad_tcga:TCGA-ZG-A9N3	prad_msk_stopsack_2021:P-0015570
prad_tcga:TCGA-QU-A6IM	prad_msk_stopsack_2021:P-0033667
prad_tcga:TCGA-XQ-A8TA	prad_msk_stopsack_2021:P-0019937
prad_tcga:TCGA-CH-5739	prad_msk_stopsack_2021:P-0032288
prad_tcga:TCGA-VP-A87K	prad_msk_stopsack_2021:P-0040838
prad_tcga:TCGA-EJ-7115	prad_msk_stopsack_2021:P-0001128
prad_tcga:TCGA-ZG-A9L1	prad_msk_stopsack_2021:P-0014076
prad_tcga:TCGA-V1-A9O5	prad_msk_stopsack_2021:P-0011096
prad_tcga:TCGA-J4-A67L	prad_msk_stopsack_2021:P-0023546
prad_tcga:TCGA-EJ-A65D	prad_msk_stopsack_2021:P-0045856
prad_tcga:TCGA-HC-7212	prad_msk_stopsack_2021:P-0006856
prad_tcga:TCGA-EJ-5525	prad_msk_stopsack_2021:P-0017708
prad_tcga:TCGA-M7-A722	prad_msk_stopsack_2021:P-0015927
prad_tcga:TCGA-EJ-5494	prad_msk_stopsack_2021:P-0005902
prad_tcga:TCGA-HC-8262	prad_msk_stopsack_2021:P-0010309
prad_tcga:TCGA-VP-A87H	prad_msk_stopsack_2021:P-0013401
prad_tcga:TCGA-CH-5761	prad_msk_stopsack_2021:P-0025759
prad_tcga:TCGA-4L-AA1F	prad_msk_stopsack_2021:P-0030013
prad_tcga:TCGA-EJ-5507	prad_msk_stopsack_2021:P-0041584
prad_tcga:TCGA-ZG-A8QY	prad_msk_stopsack_2021:P-0025952
prad_tcga:TCGA-YL-A8SL	prad_msk_stopsack_2021:P-0021355
prad_tcga:TCGA-G9-7521	prad_msk_stopsack_2021:P-0042985
prad_tcga:TCGA-EJ-8472	prad_msk_stopsack_2021:P-0029323
prad_tcga:TCGA-HC-7230	prad_msk_stopsack_2021:P-0001899
prad_tcga:TCGA-KC-A7F3	prad_msk_stopsack_2021:P-0005546
prad_tcga:TCGA-YL-A8HJ	prad_msk_stopsack_2021:P-0019863
prad_tcga:TCGA-M7-A721	prad_msk_stopsack_2021:P-0036176
prad_tcga:TCGA-M7-A720	prad_msk_stopsack_2021:P-0043708
prad_tcga:TCGA-EJ-A65M	prad_msk_stopsack_2021:P-0037701
prad_tcga:TCGA-J9-A8CP	prad_msk_stopsack_2021:P-0047982
prad_tcga:TCGA-KK-A8I7	prad_msk_stopsack_2021:P-0030628
prad_tcga:TCGA-YL-A9WY	prad_msk_stopsack_2021:P-0028102
prad_tcga:TCGA-EJ-5527	prad_msk_stopsack_2021:P-0030801
prad_tcga:TCGA-YL-A9WH	prad_msk_stopsack_2021:P-0040519
prad_tcga:TCGA-HC-8265	prad_msk_stopsack_2021:P-0050086
prad_tcga:TCGA-G9-6498	prad_msk_stopsack_2021:P-0047751
prad_tcga:TCGA-ZG-A9LM	prad_msk_stopsack_2021:P-0010034
prad_tcga:TCGA-HC-A632	prad_msk_stopsack_2021:P-0029728
prad_tcga:TCGA-YL-A9WK	prad_msk_stopsack_2021:P-0006767
prad_tcga:TCGA-CH-5771	prad_msk_stopsack_2021:P-0003101
prad_tcga:TCGA-KK-A8IH	prad_msk_stopsack_2021:P-0007182
prad_tcga:TCGA-G9-6378	prad_msk_stopsack_2021:P-0032194
prad_tcga:TCGA-HI-7171	prad_msk_stopsack_2021:P-0017271
prad_tcga:TCGA-V1-A9Z8	prad_msk_stopsack_2021:P-0040136
prad_tcga:TCGA-KK-A6E4	prad_msk_stopsack_2021:P-0037689
prad_tcga:TCGA-J9-A8CK	prad_msk_stopsack_2021:P-0018791
prad_tcga:TCGA-YL-A8HM	prad_msk_stopsack_2021:P-0026117
prad_tcga:TCGA-HC-A48F	prad_msk_stopsack_2021:P-0001445
prad_tcga:TCGA-VP-A876	prad_msk_stopsack_2021:P-0010518
prad_tcga:TCGA-EJ-A7NH	prad_msk_stopsack_2021:P-0012368
prad_tcga:TCGA-EJ-5521	prad_msk_stopsack_2021:P-0016063
prad_tcga:TCGA-EJ-7315	prad_msk_stopsack_2021:P-0016812
prad_tcga:TCGA-G9-A9S4	prad_msk_stopsack_2021:P-0020833
prad_tcga:TCGA-G9-6499	prad_msk_stopsack_2021:P-0024382
prad_tcga:TCGA-HC-A631	prad_msk_stopsack_2021:P-0035170
prad_tcga:TCGA-KC-A4BL	prad_msk_stopsack_2021:P-0036805
prad_tcga:TCGA-KK-A8IG	prad_msk_stopsack_2021:P-0049963
prad_tcga:TCGA-V1-A8MJ	prad_msk_stopsack_2021:P-0001128
prad_tcga:TCGA-V1-A8WW	prad_msk_stopsack_2021:P-0006856
prad_tcga:TCGA-XJ-A9DI	prad_msk_stopsack_2021:P-0005902
prad_tcga:TCGA-YL-A8HK	prad_msk_stopsack_2021:P-0001899
prad_tcga:TCGA-YL-A8HL	prad_msk_stopsack_2021:P-0003101
prad_tcga:TCGA-YL-A8SB	prad_msk_stopsack_2021:P-0007182
prad_tcga:TCGA-YL-A9WX	prad_msk_stopsack_2021:P-0001445
prad_msk_stopsack_2021:P-0022557	prad_p1000:TCGA-XK-AAIW
prad_msk_stopsack_2021:P-0001774	prad_p1000:03-163S4_LIVER
prad_msk_stopsack_2021:P-0037127	prad_p1000:TCGA-HC-7738
prad_msk_stopsack_2021:P-0021702	prad_p1000:12-021H4_LIVER
prad_msk_stopsack_2021:P-0021853	prad_p1000:SC_9165
prad_msk_stopsack_2021:P-0024650	prad_p1000:PROS11496-6115286-SM-6CNPY
prad_msk_stopsack_2021:P-0006231	prad_p1000:TCGA-CH-5752
prad_msk_stopsack_2021:P-0048600	prad_p1000:MO_1012
prad_msk_stopsack_2021:P-0050196	prad_p1000:SC_9121
prad_msk_stopsack_2021:P-0001325	prad_p1000:PRAD-01115245-SM-6WZF3
prad_msk_stopsack_2021:P-0009892	prad_p1000:PRAD-6115387.0-SM-7LGU9
prad_msk_stopsack_2021:P-0009044	prad_p1000:TCGA-KK-A6DY
prad_msk_stopsack_2021:P-0024219	prad_p1000:TCGA-ZG-A9LB
prad_msk_stopsack_2021:P-0029645	prad_p1000:12729
prad_msk_stopsack_2021:P-0046590	prad_p1000:SC_9008
prad_msk_stopsack_2021:P-0026395	prad_p1000:AAPC-STID0000011580-Tumor-SM-2XU1G
prad_msk_stopsack_2021:P-0022611	prad_p1000:TCGA-G9-7510
prad_msk_stopsack_2021:P-0001092	prad_p1000:TCGA-HC-A9TH
prad_msk_stopsack_2021:P-0000655	prad_p1000:SC_9017
prad_msk_stopsack_2021:P-0043158	prad_p1000:SC_9081
prad_msk_stopsack_2021:P-0009399	prad_p1000:PM161
prad_msk_stopsack_2021:P-0033465	prad_p1000:TP_2064
prad_msk_stopsack_2021:P-0019624	prad_p1000:SC_9080
prad_msk_stopsack_2021:P-0013732	prad_p1000:PRAD-6115393.0-SM-7LGUF
prad_msk_stopsack_2021:P-0021711	prad_p1000:MO_1192
prad_msk_stopsack_2021:P-0049427	prad_p1000:SC_9136
prad_msk_stopsack_2021:P-0026097	prad_p1000:TCGA-ZG-A9L1
prad_msk_stopsack_2021:P-0000725	prad_p1000:MO_1074
prad_msk_stopsack_2021:P-0001244	prad_p1000:TCGA-KK-A59V
prad_msk_stopsack_2021:P-0002990	prad_p1000:SC_9142
prad_msk_stopsack_2021:P-0006393	prad_p1000:SC_9137
prad_msk_stopsack_2021:P-0006602	prad_p1000:PRAD-6115401.0-SM-7LGUO
prad_msk_stopsack_2021:P-0007786	prad_p1000:PROS12319B-SU2C-06115120-SM-4W2NF
prad_msk_stopsack_2021:P-0008452	prad_p1000:TCGA-HC-8216
prad_msk_stopsack_2021:P-0008920	prad_pik3r1_msk_2021:P-0001128
prad_msk_stopsack_2021:P-0009151	prad_pik3r1_msk_2021:P-0014076
prad_msk_stopsack_2021:P-0009565	prad_pik3r1_msk_2021:P-0006856
prad_msk_stopsack_2021:P-0009817	prad_pik3r1_msk_2021:P-0017708
prad_msk_stopsack_2021:P-0009982	prad_pik3r1_msk_2021:P-0006602
prad_msk_stopsack_2021:P-0010746	prad_pik3r1_msk_2021:P-0006767
prad_msk_stopsack_2021:P-0012181	prad_pik3r1_msk_2021:P-0003101
prad_msk_stopsack_2021:P-0012643	prad_pik3r1_msk_2021:P-0001128
prad_msk_stopsack_2021:P-0012995	prad_pik3r1_msk_2021:P-0014076
prad_msk_stopsack_2021:P-0015209	prad_pik3r1_msk_2021:P-0011096
prad_msk_stopsack_2021:P-0017987	prad_pik3r1_msk_2021:P-0045856
prad_msk_stopsack_2021:P-0018147	prad_pik3r1_msk_2021:P-0006856
prad_msk_stopsack_2021:P-0018315	prad_pik3r1_msk_2021:P-0017708
prad_msk_stopsack_2021:P-0022255	prad_pik3r1_msk_2021:P-0010309
prad_msk_stopsack_2021:P-0023866	prad_pik3r1_msk_2021:P-0023546
prad_msk_stopsack_2021:P-0024657	prad_pik3r1_msk_2021:P-0024913
prad_msk_stopsack_2021:P-0026153	prad_pik3r1_msk_2021:P-0025759
prad_msk_stopsack_2021:P-0026228	prad_pik3r1_msk_2021:P-0041584
prad_msk_stopsack_2021:P-0026673	prad_pik3r1_msk_2021:P-0054652
prad_msk_stopsack_2021:P-0028741	prad_pik3r1_msk_2021:P-0019863
prad_msk_stopsack_2021:P-0028835	prad_pik3r1_msk_2021:P-0036176
prad_msk_stopsack_2021:P-0029523	prad_pik3r1_msk_2021:P-0043708
prad_msk_stopsack_2021:P-0030410	prad_pik3r1_msk_2021:P-0037701
prad_msk_stopsack_2021:P-0030736	prad_pik3r1_msk_2021:P-0050086
prad_msk_stopsack_2021:P-0030976	prad_pik3r1_msk_2021:P-0047982
prad_msk_stopsack_2021:P-0034472	prad_pik3r1_msk_2021:P-0029728
prad_msk_stopsack_2021:P-0036594	prad_pik3r1_msk_2021:P-0006767
prad_msk_stopsack_2021:P-0037866	prad_pik3r1_msk_2021:P-0003101
prad_msk_stopsack_2021:P-0038585	prad_pik3r1_msk_2021:P-0007182
prad_msk_stopsack_2021:P-0040262	prad_pik3r1_msk_2021:P-0032194
prad_msk_stopsack_2021:P-0040764	prad_pik3r1_msk_2021:P-0040136
prad_msk_stopsack_2021:P-0042035	prad_pik3r1_msk_2021:P-0018791
prad_msk_stopsack_2021:P-0042135	prad_pik3r1_msk_2021:P-0001445
prad_msk_stopsack_2021:P-0042144	prad_pik3r1_msk_2021:P-0010518
prad_msk_stopsack_2021:P-0042341	prad_pik3r1_msk_2021:P-0016812
prad_msk_stopsack_2021:P-0045291	prad_pik3r1_msk_2021:P-0018707
prad_msk_stopsack_2021:P-0046569	prad_pik3r1_msk_2021:P-0020833
prad_msk_stopsack_2021:P-0047475	prad_pik3r1_msk_2021:P-0043709
prad_msk_stopsack_2021:P-0048357	prad_pik3r1_msk_2021:P-0049963
prad_msk_stopsack_2021:P-0049730	prad_pik3r1_msk_2021:P-0010015
prad_msk_stopsack_2021:P-0049900	prad_su2c_2019:9115522
prad_msk_stopsack_2021:P-0001426	prad_su2c_2019:1115202
prad_msk_stopsack_2021:P-0018302	prad_su2c_2019:1115581
prad_msk_stopsack_2021:P-0049438	prad_su2c_2019:9115036
prad_msk_stopsack_2021:P-0011370	prad_su2c_2019:9115422
prad_msk_stopsack_2021:P-0008441	prad_su2c_2019:5115546
prad_msk_stopsack_2021:P-0045158	prad_su2c_2019:96115624
prad_msk_stopsack_2021:P-0009656	prad_su2c_2019:9115567
prad_msk_stopsack_2021:P-0018704	prad_su2c_2019:97115563
prad_msk_stopsack_2021:P-0035133	prad_su2c_2019:9115572
prad_msk_stopsack_2021:P-0027380	prad_su2c_2019:5115411
prad_msk_stopsack_2021:P-0023605	prad_su2c_2019:96115489
prad_msk_stopsack_2021:P-0019782	prad_su2c_2019:96115272
prad_msk_stopsack_2021:P-0024217	prad_su2c_2019:5115615
prad_msk_stopsack_2021:P-0019819	prad_su2c_2019:6115590
prad_msk_stopsack_2021:P-0038672	prad_su2c_2019:97115456
prad_msk_stopsack_2021:P-0023405	prad_su2c_2019:6115012
prad_msk_stopsack_2021:P-0019199	prad_su2c_2019:1115554
prad_msk_stopsack_2021:P-0001071	prad_su2c_2019:9115416
prad_msk_stopsack_2021:P-0008077	prad_su2c_2019:6115387
prad_msk_stopsack_2021:P-0022099	prad_su2c_2019:5115547
prad_msk_stopsack_2021:P-0029087	prad_su2c_2019:97115280
prad_msk_stopsack_2021:P-0049809	prad_su2c_2019:5115128
prad_msk_stopsack_2021:P-0023419	prad_su2c_2019:9115055
prad_msk_stopsack_2021:P-0047436	prad_su2c_2019:9115181
prad_msk_stopsack_2021:P-0020078	prad_su2c_2019:5115327
prad_msk_stopsack_2021:P-0009904	prad_su2c_2019:96115209
prad_msk_stopsack_2021:P-0016941	prad_su2c_2019:6115393
prad_msk_stopsack_2021:P-0038415	prad_su2c_2019:1115249
prad_msk_stopsack_2021:P-0045357	prad_su2c_2019:1115544
prad_msk_stopsack_2021:P-0014412	prad_su2c_2019:9115180
prad_msk_stopsack_2021:P-0022437	prad_su2c_2019:6115401
prad_msk_stopsack_2021:P-0013858	prad_su2c_2019:5115029
prad_msk_stopsack_2021:P-0047878	prad_su2c_2019:13115379
prad_msk_stopsack_2021:P-0023307	prad_su2c_2019:6115120
prad_msk_stopsack_2021:P-0032256	prad_su2c_2019:6115382
prad_msk_stopsack_2021:P-0050309	prad_su2c_2019:9115051
prad_msk_stopsack_2021:P-0011577	prad_cdk12_mskcc_2020:P-0009006
prad_msk_stopsack_2021:P-0007533	prad_cdk12_mskcc_2020:P-0001128
prad_msk_stopsack_2021:P-0015597	prad_cdk12_mskcc_2020:P-0014076
prad_msk_stopsack_2021:P-0019582	prad_cdk12_mskcc_2020:P-0025759
prad_msk_stopsack_2021:P-0024488	prad_cdk12_mskcc_2020:P-0030801
prad_msk_stopsack_2021:P-0030666	prad_mcspc_mskcc_2020:P-0010034
prad_msk_stopsack_2021:P-0036506	prad_mcspc_mskcc_2020:P-0025952
prad_msk_stopsack_2021:P-0036545	prad_mcspc_mskcc_2020:P-0007182
prad_msk_stopsack_2021:P-0037458	prostate_dkfz_2018:ICGC_PCA030
prad_msk_stopsack_2021:P-0014004	prostate_dkfz_2018:ICGC_PCA033
prad_msk_stopsack_2021:P-0018581	prostate_dkfz_2018:ICGC_PCA125
prad_msk_stopsack_2021:P-0014299	prostate_dkfz_2018:ICGC_PCA038
prad_msk_stopsack_2021:P-0003695	prostate_dkfz_2018:ICGC_PCAL16
prad_msk_stopsack_2021:P-0012928	nepc_wcm_2016:WCMC21010
prad_msk_stopsack_2021:P-0003925	nepc_wcm_2016:WCMC21014
prad_msk_stopsack_2021:P-0014271	nepc_wcm_2016:WCMC10362
prad_msk_stopsack_2021:P-0044288	nepc_wcm_2016:WCMC161
prad_msk_stopsack_2021:P-0002516	nepc_wcm_2016:WCMC1
prad_msk_stopsack_2021:P-0003619
prad_msk_stopsack_2021:P-0008206
prad_msk_stopsack_2021:P-0008390
prad_msk_stopsack_2021:P-0010382
prad_msk_stopsack_2021:P-0013465
prad_msk_stopsack_2021:P-0013674
prad_msk_stopsack_2021:P-0014235
prad_msk_stopsack_2021:P-0015628
prad_msk_stopsack_2021:P-0016015
prad_msk_stopsack_2021:P-0018068
prad_msk_stopsack_2021:P-0018627
prad_msk_stopsack_2021:P-0025550
prad_msk_stopsack_2021:P-0026808
prad_msk_stopsack_2021:P-0030086
prad_msk_stopsack_2021:P-0034431
prad_msk_stopsack_2021:P-0042252
prad_msk_stopsack_2021:P-0044256
prad_msk_stopsack_2021:P-0045146
prad_msk_stopsack_2021:P-0050289
prad_msk_stopsack_2021:P-0015134
prad_msk_stopsack_2021:P-0003442
prad_msk_stopsack_2021:P-0003665
prad_msk_stopsack_2021:P-0027350
prad_msk_stopsack_2021:P-0027722
prad_msk_stopsack_2021:P-0033832
prad_msk_stopsack_2021:P-0040334
prad_msk_stopsack_2021:P-0041231
prad_msk_stopsack_2021:P-0002296
prad_msk_stopsack_2021:P-0003758
prad_msk_stopsack_2021:P-0005867
prad_msk_stopsack_2021:P-0011156
prad_msk_stopsack_2021:P-0011368
prad_msk_stopsack_2021:P-0012025
prad_msk_stopsack_2021:P-0014613
prad_msk_stopsack_2021:P-0025650
prad_msk_stopsack_2021:P-0032701
prad_msk_stopsack_2021:P-0042960
prad_msk_stopsack_2021:P-0013116
prad_msk_stopsack_2021:P-0020424
prad_msk_stopsack_2021:P-0035818
prad_msk_stopsack_2021:P-0046826
prad_msk_stopsack_2021:P-0045250
prad_msk_stopsack_2021:P-0018117
prad_msk_stopsack_2021:P-0021600
prad_msk_stopsack_2021:P-0029248
prad_msk_stopsack_2021:P-0040088
prad_msk_stopsack_2021:P-0041610
prad_msk_stopsack_2021:P-0033226
prad_msk_stopsack_2021:P-0023741
prad_msk_stopsack_2021:P-0049188
prad_msk_stopsack_2021:P-0015058
prad_msk_stopsack_2021:P-0022420
prad_msk_stopsack_2021:P-0000197
prad_msk_stopsack_2021:P-0000377
prad_msk_stopsack_2021:P-0000610
prad_msk_stopsack_2021:P-0000647
prad_msk_stopsack_2021:P-0000935
prad_msk_stopsack_2021:P-0001108
prad_msk_stopsack_2021:P-0001153
prad_msk_stopsack_2021:P-0001247
prad_msk_stopsack_2021:P-0001262
prad_msk_stopsack_2021:P-0001382
prad_msk_stopsack_2021:P-0001698
prad_msk_stopsack_2021:P-0001776
prad_msk_stopsack_2021:P-0001795
prad_msk_stopsack_2021:P-0001861
prad_msk_stopsack_2021:P-0002123
prad_msk_stopsack_2021:P-0002303
prad_msk_stopsack_2021:P-0002431
prad_msk_stopsack_2021:P-0002564
prad_msk_stopsack_2021:P-0002740
prad_msk_stopsack_2021:P-0002897
prad_msk_stopsack_2021:P-0002984
prad_msk_stopsack_2021:P-0003023
prad_msk_stopsack_2021:P-0003390
prad_msk_stopsack_2021:P-0003395
prad_msk_stopsack_2021:P-0003511
prad_msk_stopsack_2021:P-0003519
prad_msk_stopsack_2021:P-0003538
prad_msk_stopsack_2021:P-0003597
prad_msk_stopsack_2021:P-0003602
prad_msk_stopsack_2021:P-0003799
prad_msk_stopsack_2021:P-0003939
prad_msk_stopsack_2021:P-0004221
prad_msk_stopsack_2021:P-0004312
prad_msk_stopsack_2021:P-0004830
prad_msk_stopsack_2021:P-0005065
prad_msk_stopsack_2021:P-0005147
prad_msk_stopsack_2021:P-0005213
prad_msk_stopsack_2021:P-0005217
prad_msk_stopsack_2021:P-0005454
prad_msk_stopsack_2021:P-0005460
prad_msk_stopsack_2021:P-0005636
prad_msk_stopsack_2021:P-0005697
prad_msk_stopsack_2021:P-0005756
prad_msk_stopsack_2021:P-0005956
prad_msk_stopsack_2021:P-0006057
prad_msk_stopsack_2021:P-0006378
prad_msk_stopsack_2021:P-0006440
prad_msk_stopsack_2021:P-0006595
prad_msk_stopsack_2021:P-0006603
prad_msk_stopsack_2021:P-0006815
prad_msk_stopsack_2021:P-0006837
prad_msk_stopsack_2021:P-0007006
prad_msk_stopsack_2021:P-0007078
prad_msk_stopsack_2021:P-0007219
prad_msk_stopsack_2021:P-0007358
prad_msk_stopsack_2021:P-0007359
prad_msk_stopsack_2021:P-0007393
prad_msk_stopsack_2021:P-0007416
prad_msk_stopsack_2021:P-0007576
prad_msk_stopsack_2021:P-0007629
prad_msk_stopsack_2021:P-0007749
prad_msk_stopsack_2021:P-0007874
prad_msk_stopsack_2021:P-0007965
prad_msk_stopsack_2021:P-0008074
prad_msk_stopsack_2021:P-0008330
prad_msk_stopsack_2021:P-0008525
prad_msk_stopsack_2021:P-0008869
prad_msk_stopsack_2021:P-0008879
prad_msk_stopsack_2021:P-0009352
prad_msk_stopsack_2021:P-0009640
prad_msk_stopsack_2021:P-0009787
prad_msk_stopsack_2021:P-0009989
prad_msk_stopsack_2021:P-0010071
prad_msk_stopsack_2021:P-0010078
prad_msk_stopsack_2021:P-0010823
prad_msk_stopsack_2021:P-0010959
prad_msk_stopsack_2021:P-0011093
prad_msk_stopsack_2021:P-0011364
prad_msk_stopsack_2021:P-0012197
prad_msk_stopsack_2021:P-0012327
prad_msk_stopsack_2021:P-0012555
prad_msk_stopsack_2021:P-0012630
prad_msk_stopsack_2021:P-0013115
prad_msk_stopsack_2021:P-0013457
prad_msk_stopsack_2021:P-0013812
prad_msk_stopsack_2021:P-0014009
prad_msk_stopsack_2021:P-0014400
prad_msk_stopsack_2021:P-0014527
prad_msk_stopsack_2021:P-0014530
prad_msk_stopsack_2021:P-0014531
prad_msk_stopsack_2021:P-0014841
prad_msk_stopsack_2021:P-0015015
prad_msk_stopsack_2021:P-0015132
prad_msk_stopsack_2021:P-0015250
prad_msk_stopsack_2021:P-0015406
prad_msk_stopsack_2021:P-0015448
prad_msk_stopsack_2021:P-0015618
prad_msk_stopsack_2021:P-0015767
prad_msk_stopsack_2021:P-0015817
prad_msk_stopsack_2021:P-0016396
prad_msk_stopsack_2021:P-0016876
prad_msk_stopsack_2021:P-0016877
prad_msk_stopsack_2021:P-0016983
prad_msk_stopsack_2021:P-0017041
prad_msk_stopsack_2021:P-0017548
prad_msk_stopsack_2021:P-0017605
prad_msk_stopsack_2021:P-0017882
prad_msk_stopsack_2021:P-0017886
prad_msk_stopsack_2021:P-0017892
prad_msk_stopsack_2021:P-0018384
prad_msk_stopsack_2021:P-0019623
prad_msk_stopsack_2021:P-0019781
prad_msk_stopsack_2021:P-0019815
prad_msk_stopsack_2021:P-0020023
prad_msk_stopsack_2021:P-0020237
prad_msk_stopsack_2021:P-0020750
prad_msk_stopsack_2021:P-0020802
prad_msk_stopsack_2021:P-0020984
prad_msk_stopsack_2021:P-0021023
prad_msk_stopsack_2021:P-0021083
prad_msk_stopsack_2021:P-0021297
prad_msk_stopsack_2021:P-0021310
prad_msk_stopsack_2021:P-0021342
prad_msk_stopsack_2021:P-0021388
prad_msk_stopsack_2021:P-0021597
prad_msk_stopsack_2021:P-0022117
prad_msk_stopsack_2021:P-0022343
prad_msk_stopsack_2021:P-0022439
prad_msk_stopsack_2021:P-0022700
prad_msk_stopsack_2021:P-0022825
prad_msk_stopsack_2021:P-0022892
prad_msk_stopsack_2021:P-0023030
prad_msk_stopsack_2021:P-0023249
prad_msk_stopsack_2021:P-0023276
prad_msk_stopsack_2021:P-0023345
prad_msk_stopsack_2021:P-0023621
prad_msk_stopsack_2021:P-0023838
prad_msk_stopsack_2021:P-0023874
prad_msk_stopsack_2021:P-0023958
prad_msk_stopsack_2021:P-0024140
prad_msk_stopsack_2021:P-0024249
prad_msk_stopsack_2021:P-0024316
prad_msk_stopsack_2021:P-0024522
prad_msk_stopsack_2021:P-0024534
prad_msk_stopsack_2021:P-0024598
prad_msk_stopsack_2021:P-0024600
prad_msk_stopsack_2021:P-0024898
prad_msk_stopsack_2021:P-0025140
prad_msk_stopsack_2021:P-0025150
prad_msk_stopsack_2021:P-0025319
prad_msk_stopsack_2021:P-0025494
prad_msk_stopsack_2021:P-0026196
prad_msk_stopsack_2021:P-0026237
prad_msk_stopsack_2021:P-0026447
prad_msk_stopsack_2021:P-0026871
prad_msk_stopsack_2021:P-0027160
prad_msk_stopsack_2021:P-0027245
prad_msk_stopsack_2021:P-0027453
prad_msk_stopsack_2021:P-0027466
prad_msk_stopsack_2021:P-0027874
prad_msk_stopsack_2021:P-0028167
prad_msk_stopsack_2021:P-0028430
prad_msk_stopsack_2021:P-0028551
prad_msk_stopsack_2021:P-0028569
prad_msk_stopsack_2021:P-0028576
prad_msk_stopsack_2021:P-0029604
prad_msk_stopsack_2021:P-0029948
prad_msk_stopsack_2021:P-0030184
prad_msk_stopsack_2021:P-0030675
prad_msk_stopsack_2021:P-0030812
prad_msk_stopsack_2021:P-0030842
prad_msk_stopsack_2021:P-0030943
prad_msk_stopsack_2021:P-0031771
prad_msk_stopsack_2021:P-0032390
prad_msk_stopsack_2021:P-0032478
prad_msk_stopsack_2021:P-0032801
prad_msk_stopsack_2021:P-0033194
prad_msk_stopsack_2021:P-0033300
prad_msk_stopsack_2021:P-0033660
prad_msk_stopsack_2021:P-0033961
prad_msk_stopsack_2021:P-0034030
prad_msk_stopsack_2021:P-0034298
prad_msk_stopsack_2021:P-0034946
prad_msk_stopsack_2021:P-0035221
prad_msk_stopsack_2021:P-0035283
prad_msk_stopsack_2021:P-0035562
prad_msk_stopsack_2021:P-0036120
prad_msk_stopsack_2021:P-0036215
prad_msk_stopsack_2021:P-0036346
prad_msk_stopsack_2021:P-0036349
prad_msk_stopsack_2021:P-0036492
prad_msk_stopsack_2021:P-0036555
prad_msk_stopsack_2021:P-0036675
prad_msk_stopsack_2021:P-0036677
prad_msk_stopsack_2021:P-0037029
prad_msk_stopsack_2021:P-0037177
prad_msk_stopsack_2021:P-0037255
prad_msk_stopsack_2021:P-0038328
prad_msk_stopsack_2021:P-0038349
prad_msk_stopsack_2021:P-0038369
prad_msk_stopsack_2021:P-0038412
prad_msk_stopsack_2021:P-0038422
prad_msk_stopsack_2021:P-0038559
prad_msk_stopsack_2021:P-0038584
prad_msk_stopsack_2021:P-0038808
prad_msk_stopsack_2021:P-0038856
prad_msk_stopsack_2021:P-0039550
prad_msk_stopsack_2021:P-0039771
prad_msk_stopsack_2021:P-0039805
prad_msk_stopsack_2021:P-0040207
prad_msk_stopsack_2021:P-0040259
prad_msk_stopsack_2021:P-0040965
prad_msk_stopsack_2021:P-0040995
prad_msk_stopsack_2021:P-0041461
prad_msk_stopsack_2021:P-0041546
prad_msk_stopsack_2021:P-0041659
prad_msk_stopsack_2021:P-0041732
prad_msk_stopsack_2021:P-0042249
prad_msk_stopsack_2021:P-0042436
prad_msk_stopsack_2021:P-0042583
prad_msk_stopsack_2021:P-0042663
prad_msk_stopsack_2021:P-0042681
prad_msk_stopsack_2021:P-0042826
prad_msk_stopsack_2021:P-0042830
prad_msk_stopsack_2021:P-0042957
prad_msk_stopsack_2021:P-0042971
prad_msk_stopsack_2021:P-0043060
prad_msk_stopsack_2021:P-0043235
prad_msk_stopsack_2021:P-0043323
prad_msk_stopsack_2021:P-0043853
prad_msk_stopsack_2021:P-0044376
prad_msk_stopsack_2021:P-0044550
prad_msk_stopsack_2021:P-0044601
prad_msk_stopsack_2021:P-0044656
prad_msk_stopsack_2021:P-0044884
prad_msk_stopsack_2021:P-0045399
prad_msk_stopsack_2021:P-0045412
prad_msk_stopsack_2021:P-0046586
prad_msk_stopsack_2021:P-0046812
prad_msk_stopsack_2021:P-0047008
prad_msk_stopsack_2021:P-0047799
prad_msk_stopsack_2021:P-0047959
prad_msk_stopsack_2021:P-0048602
prad_msk_stopsack_2021:P-0048955
prad_msk_stopsack_2021:P-0049520
prad_msk_stopsack_2021:P-0049886
prad_msk_stopsack_2021:P-0050169
prad_msk_stopsack_2021:P-0017491
prad_msk_stopsack_2021:P-0002990
prad_msk_stopsack_2021:P-0001774
prad_msk_stopsack_2021:P-0006231
prad_msk_stopsack_2021:P-0004910
prad_msk_stopsack_2021:P-0001325
prad_msk_stopsack_2021:P-0009044
prad_msk_stopsack_2021:P-0001092
prad_msk_stopsack_2021:P-0000655
prad_mskcc_2017:P-0003541
prad_msk_stopsack_2021:P-0000725
prad_msk_stopsack_2021:P-0001244
prad_msk_stopsack_2021:P-0006393
prad_msk_stopsack_2021:P-0006602
prad_msk_stopsack_2021:P-0007786
prad_msk_stopsack_2021:P-0008452
prad_msk_stopsack_2021:P-0008920
prad_msk_stopsack_2021:P-0009151
prad_msk_stopsack_2021:P-0001426
prad_msk_stopsack_2021:P-0008441
prad_msk_stopsack_2021:P-0000966
prad_msk_stopsack_2021:P-0005546
prad_msk_stopsack_2021:P-0002123
prad_msk_stopsack_2021:P-0005065
prad_msk_stopsack_2021:P-0007533
prad_msk_stopsack_2021:P-0003695
prad_msk_stopsack_2021:P-0003925
prad_msk_stopsack_2021:P-0002516
prad_msk_stopsack_2021:P-0003619
prad_msk_stopsack_2021:P-0003799
prad_msk_stopsack_2021:P-0008206
prad_msk_stopsack_2021:P-0008390
prad_msk_stopsack_2021:P-0001687
prad_msk_stopsack_2021:P-0003442
prad_msk_stopsack_2021:P-0003665
prad_msk_stopsack_2021:P-0002296
prad_msk_stopsack_2021:P-0003758
prad_msk_stopsack_2021:P-0005867
prad_msk_stopsack_2021:P-0000197
prad_msk_stopsack_2021:P-0000377
prad_msk_stopsack_2021:P-0000610
prad_msk_stopsack_2021:P-0000647
prad_msk_stopsack_2021:P-0000935
prad_msk_stopsack_2021:P-0001071
prad_msk_stopsack_2021:P-0001108
prad_msk_stopsack_2021:P-0001153
prad_msk_stopsack_2021:P-0001247
prad_msk_stopsack_2021:P-0001262
prad_msk_stopsack_2021:P-0001382
prad_mskcc_2017:P-0001630
prad_msk_stopsack_2021:P-0001698
prad_msk_stopsack_2021:P-0001776
prad_msk_stopsack_2021:P-0001795
prad_msk_stopsack_2021:P-0001861
prad_msk_stopsack_2021:P-0002303
prad_msk_stopsack_2021:P-0002564
prad_msk_stopsack_2021:P-0002740
prad_msk_stopsack_2021:P-0002897
prad_msk_stopsack_2021:P-0002984
prad_msk_stopsack_2021:P-0003023
prad_msk_stopsack_2021:P-0003390
prad_msk_stopsack_2021:P-0003395
prad_msk_stopsack_2021:P-0003511
prad_msk_stopsack_2021:P-0003519
prad_msk_stopsack_2021:P-0003538
prad_msk_stopsack_2021:P-0003597
prad_msk_stopsack_2021:P-0003602
prad_msk_stopsack_2021:P-0003939
prad_msk_stopsack_2021:P-0004221
prad_msk_stopsack_2021:P-0004312
prad_mskcc_2017:P-0004556
prad_msk_stopsack_2021:P-0004830
prad_mskcc_2017:P-0005098
prad_msk_stopsack_2021:P-0005147
prad_msk_stopsack_2021:P-0005213
prad_msk_stopsack_2021:P-0005217
prad_msk_stopsack_2021:P-0005454
prad_msk_stopsack_2021:P-0005460
prad_msk_stopsack_2021:P-0005636
prad_msk_stopsack_2021:P-0005697
prad_msk_stopsack_2021:P-0005756
prad_msk_stopsack_2021:P-0005956
prad_msk_stopsack_2021:P-0006057
prad_msk_stopsack_2021:P-0006378
prad_msk_stopsack_2021:P-0006440
prad_msk_stopsack_2021:P-0006595
prad_msk_stopsack_2021:P-0006603
prad_mskcc_2017:P-0006806
prad_msk_stopsack_2021:P-0006837
prad_mskcc_2017:P-0006905
prad_msk_stopsack_2021:P-0007006
prad_msk_stopsack_2021:P-0007078
prad_msk_stopsack_2021:P-0007219
prad_msk_stopsack_2021:P-0007358
prad_msk_stopsack_2021:P-0007359
prad_msk_stopsack_2021:P-0007393
prad_msk_stopsack_2021:P-0007416
prad_msk_stopsack_2021:P-0007576
prad_msk_stopsack_2021:P-0007629
prad_msk_stopsack_2021:P-0007749
prad_mskcc_2017:P-0007856
prad_msk_stopsack_2021:P-0007874
prad_msk_stopsack_2021:P-0007965
prad_msk_stopsack_2021:P-0008074
prad_msk_stopsack_2021:P-0008330
prad_msk_stopsack_2021:P-0008525
prad_msk_stopsack_2021:P-0008869
prad_msk_stopsack_2021:P-0008879
prad_msk_stopsack_2021:P-0009352
prad_p1000:21010
prad_p1000:TP_2079
prad_p1000:P07-360
prad_p1000:TCGA-EJ-7115
prad_p1000:06-134H1_LN
prad_p1000:SC_9058
prad_p1000:PROS11496-6115285-SM-6CNPX
prad_p1000:SC_9097
prad_p1000:SC_9019
prad_p1000:SC_9091
prad_p1000:TCGA-EJ-5525
prad_p1000:05-148E3_LIVER
prad_p1000:PROS01448-1115161-SM-5SGU1
prad_p1000:PROS12319B-SU2C-06115114-SM-4W2N9
prad_p1000:SC_9048
prad_p1000:SC_9123
prad_p1000:SC_9144
prad_p1000:TCGA-EJ-A65D
prad_p1000:TCGA-EJ-5494
prad_p1000:TCGA-HC-7212
prad_p1000:TCGA-HC-8262
prad_p1000:TCGA-M7-A722
prad_p1000:TCGA-QU-A6IM
prad_p1000:PROS11496-6115322-SM-6CNQ6
prad_p1000:03-192B_LUNG
prad_p1000:20990
prad_p1000:PR-0415
prad_p1000:SC_9087
prad_p1000:MO_1162
prad_p1000:SC_9128
prad_p1000:12-011I7_LN
prad_p1000:P04-1421
prad_p1000:PROS01448-DFCI.10-448.P38-SM-5CQ52
prad_p1000:PROS10448-SUTC.01115092-SM-4JC74
prad_p1000:TCGA-EJ-A65M
prad_p1000:AAPC-IP_LG-021-Tumor-SM-3NC63
prad_p1000:P09-2497
prad_p1000:PR-00-160
prad_p1000:PRAD-6115403.0-SM-7LGUQ
prad_p1000:PROS01448-1115244-SM-5SGU6
prad_p1000:TCGA-4L-AA1F
prad_p1000:TCGA-ZG-A8QY
prad_p1000:05-116F_LUNG
prad_p1000:03-082H1_LIVER
prad_p1000:PR-3036
prad_p1000:PRAD-01115249-SM-6VZ7K
prad_p1000:SC_9055
prad_p1000:TCGA-HC-8264
prad_p1000:TCGA-KK-A8I7
prad_p1000:TCGA-V1-A8WW
prad_p1000:TP_2077
prad_p1000:MO_1232
prad_p1000:TCGA-YL-A9WY
prad_p1000:12728
prad_p1000:PRAD-6115399.0-SM-7LGUL
prad_p1000:PROS01448-6115242-SM-67ES1
prad_p1000:AAPC-STID0000020508-Tumor-SM-2XU22
prad_p1000:21017
prad_p1000:PRAD-6115385.0-SM-7LGU7
prad_p1000:TCGA-ZG-A9LN
prad_p1000:PM78
prad_p1000:PR-3026
prad_p1000:PROS01448-DFCI.10-448.P42-SM-5CQ55
prad_p1000:SC_9132
prad_p1000:TCGA-EJ-A46G
prad_p1000:TP_2078
prad_p1000:05-165O_ADRENAL
prad_p1000:PR-09-3421
prad_p1000:PROS01448-DFCI.10-448.P29-SM-5CQ4S
prad_p1000:TCGA-CH-5771
prad_p1000:PROS01448-DFCI.10-448.P27-SM-5CQ5J
prad_p1000:TCGA-G9-6338
prad_p1000:MO_1095
prad_p1000:MO_1179
prad_p1000:PM156
prad_p1000:PROS11496-6115320-SM-6CNQ4
prad_p1000:SC_9107
prad_p1000:SC_9109
prad_p1000:TCGA-YL-A8SL
prad_p1000:SC_9063
prad_p1000:SC_9071
prad_p1000:PM10
prad_p1000:TCGA-G9-6498
prad_p1000:TCGA-KK-A8IH
prad_p1000:MO_1244
prad_p1000:TCGA-KK-A6E4
prad_p1000:TCGA-YL-A8HO
prad_p1000:99-064O_LN
prad_p1000:TCGA-G9-7525
prad_p1000:AAPC-IP_LG-061-Tumor-SM-3NC6X
prad_p1000:PR-01-2492
prad_p1000:PR-04-3222
prad_p1000:TCGA-G9-6369
prad_p1000:TCGA-VP-AA1N
prad_p1000:SC_9060
prad_p1000:MO_1118
prad_p1000:PROS12319B-SU2C-06115121-SM-4W2NG
prad_p1000:SC_9126
prad_p1000:TCGA-EJ-5521
prad_p1000:TCGA-YL-A9WK
prad_p1000:TCGA-V1-A9Z8
prad_p1000:21011
prad_p1000:PRAD-6115390.0-SM-7LGUC
prad_p1000:SC_9163
prad_p1000:TP_2010
prad_p1000:10362
prad_p1000:05-214BB2_BONE
prad_p1000:AAPC-IP_LG-031-Tumor-SM-3NC69
prad_p1000:AAPC-IP_LG-033-Tumor-SM-3NC6B
prad_p1000:AAPC-IP_LG-051-Tumor-SM-3NC6N
prad_p1000:AAPC-IP_LG-053-Tumor-SM-3NC6P
prad_p1000:AAPC-IP_LG-091-Tumor-SM-3NC7I
prad_p1000:AAPC-STID0000012848-Tumor-SM-2XU1N
prad_p1000:MO_1020
prad_p1000:MO_1071
prad_p1000:MO_1128
prad_p1000:MO_1339
prad_p1000:P04-1243
prad_p1000:P06-4428
prad_p1000:P07-5036
prad_p1000:PM155
prad_p1000:PR-02-254
prad_p1000:PR-06-1999
prad_p1000:PRAD-STID7520-Tumor-SM-2RXM6
prad_p1000:PRAD-6115383.0-SM-7LGU6
prad_p1000:PRAD-6115386.0-SM-7LGU8
prad_p1000:PRAD-6115391.0-SM-7LGUD
prad_p1000:PRAD-6115392.0-SM-7LGUE
prad_p1000:PRAD-6115395.0-SM-7LGUH
prad_p1000:PROS01448-6115251-SM-67ES6
prad_p1000:PROS10448-SUTC.01115091-SM-4JC6Y
prad_p1000:PROS11496-6115295-SM-6CNQ7
prad_p1000:PROS11496-6115317-SM-6CNQ2
prad_p1000:PROS11496-6115321-SM-6CNQ5
prad_p1000:PROS12319B-SU2C-06115118-SM-4W2ND
prad_p1000:SC_9024
prad_p1000:SC_9028
prad_p1000:SC_9031
prad_p1000:SC_9046
prad_p1000:SC_9068
prad_p1000:SC_9073
prad_p1000:SC_9082
prad_p1000:SC_9083
prad_p1000:SC_9084
prad_p1000:SC_9086
prad_p1000:SC_9092
prad_p1000:SC_9096
prad_p1000:SC_9124
prad_p1000:SC_9151
prad_p1000:SC_9153
prad_p1000:SC_9173
prad_p1000:TCGA-CH-5761
prad_p1000:TCGA-EJ-A7NH
prad_p1000:TCGA-EJ-5507
prad_p1000:TCGA-EJ-5514
prad_p1000:TCGA-EJ-7315
prad_p1000:TCGA-EJ-8472
prad_p1000:TCGA-G9-A9S0
prad_p1000:TCGA-G9-A9S4
prad_p1000:TCGA-G9-6499
prad_p1000:TCGA-G9-7521
prad_p1000:TCGA-HC-A48F
prad_p1000:TCGA-HC-A631
prad_p1000:TCGA-HC-A632
prad_p1000:TCGA-HC-7230
prad_p1000:TCGA-HI-7171
prad_p1000:TCGA-J4-A67L
prad_p1000:TCGA-J9-A8CK
prad_p1000:TCGA-KC-A4BL
prad_p1000:TCGA-KK-A8IG
prad_p1000:TCGA-V1-A8MJ
prad_p1000:TCGA-V1-A9O5
prad_p1000:TCGA-VP-A872
prad_p1000:TCGA-XJ-A9DI
prad_p1000:TCGA-YL-A8HK
prad_p1000:TCGA-YL-A8HL
prad_p1000:TCGA-YL-A8SB
prad_p1000:TCGA-YL-A9WH
prad_p1000:TCGA-YL-A9WX
prad_p1000:TCGA-ZG-A9LM
prad_p1000:7951
prad_p1000:10361
prad_p1000:20870
prad_p1000:21016
prad_cdk12_mskcc_2020:P-0010015
prad_cdk12_mskcc_2020:P-0021702
prad_cdk12_mskcc_2020:P-0006231
prad_cdk12_mskcc_2020:P-0021853
prad_cdk12_mskcc_2020:P-0000655
prad_cdk12_mskcc_2020:P-0003541
prad_cdk12_mskcc_2020:P-0009399
prad_cdk12_mskcc_2020:P-0000725
prad_cdk12_mskcc_2020:P-0001244
prad_cdk12_mskcc_2020:P-0001639
prad_cdk12_mskcc_2020:P-0002990
prad_cdk12_mskcc_2020:P-0005902
prad_cdk12_mskcc_2020:P-0006393
prad_cdk12_mskcc_2020:P-0007786
prad_cdk12_mskcc_2020:P-0008452
prad_cdk12_mskcc_2020:P-0008920
prad_cdk12_mskcc_2020:P-0009151
prad_cdk12_mskcc_2020:P-0009565
prad_cdk12_mskcc_2020:P-0009817
prad_cdk12_mskcc_2020:P-0009982
prad_cdk12_mskcc_2020:P-0010309
prad_cdk12_mskcc_2020:P-0010746
prad_cdk12_mskcc_2020:P-0011096
prad_cdk12_mskcc_2020:P-0012181
prad_cdk12_mskcc_2020:P-0012643
prad_cdk12_mskcc_2020:P-0012711
prad_cdk12_mskcc_2020:P-0012995
prad_cdk12_mskcc_2020:P-0013401
prad_cdk12_mskcc_2020:P-0013732
prad_cdk12_mskcc_2020:P-0015209
prad_cdk12_mskcc_2020:P-0017987
prad_cdk12_mskcc_2020:P-0018315
prad_cdk12_mskcc_2020:P-0019624
prad_cdk12_mskcc_2020:P-0021711
prad_cdk12_mskcc_2020:P-0022255
prad_cdk12_mskcc_2020:P-0023249
prad_cdk12_mskcc_2020:P-0023546
prad_cdk12_mskcc_2020:P-0023866
prad_cdk12_mskcc_2020:P-0024913
prad_cdk12_mskcc_2020:P-0025759
prad_cdk12_mskcc_2020:P-0026097
prad_cdk12_mskcc_2020:P-0026153
prad_cdk12_mskcc_2020:P-0026228
prad_cdk12_mskcc_2020:P-0026673
prad_cdk12_mskcc_2020:P-0027921
prad_cdk12_mskcc_2020:P-0028741
prad_cdk12_mskcc_2020:P-0029523
prad_cdk12_mskcc_2020:P-0030410
prad_cdk12_mskcc_2020:P-0030736
prad_cdk12_mskcc_2020:P-0030976
prad_cdk12_mskcc_2020:P-0036594
prad_cdk12_mskcc_2020:P-0001426
prad_cdk12_mskcc_2020:P-0018302
prad_cdk12_mskcc_2020:P-0000966
prad_cdk12_mskcc_2020:P-0019782
prad_cdk12_mskcc_2020:P-0019819
prad_cdk12_mskcc_2020:P-0023605
prad_cdk12_mskcc_2020:P-0024217
prad_cdk12_mskcc_2020:P-0005546
prad_cdk12_mskcc_2020:P-0019863
prad_cdk12_mskcc_2020:P-0023419
prad_cdk12_mskcc_2020:P-0009904
prad_cdk12_mskcc_2020:P-0016941
prad_cdk12_mskcc_2020:P-0028102
prad_cdk12_mskcc_2020:P-0030801
prad_cdk12_mskcc_2020:P-0013032
prad_cdk12_mskcc_2020:P-0013858
prad_cdk12_mskcc_2020:P-0029728
prad_cdk12_mskcc_2020:P-0032256
prad_cdk12_mskcc_2020:P-0006837
prad_cdk12_mskcc_2020:P-0007182
prad_cdk12_mskcc_2020:P-0007533
prad_cdk12_mskcc_2020:P-0011577
prad_cdk12_mskcc_2020:P-0015597
prad_cdk12_mskcc_2020:P-0017271
prad_cdk12_mskcc_2020:P-0019582
prad_cdk12_mskcc_2020:P-0028784
prad_cdk12_mskcc_2020:P-0032194
prad_cdk12_mskcc_2020:P-0003695
prad_cdk12_mskcc_2020:P-0014299
prad_cdk12_mskcc_2020:P-0018791
prad_cdk12_mskcc_2020:P-0001445
prad_cdk12_mskcc_2020:P-0003442
prad_cdk12_mskcc_2020:P-0005867
prad_cdk12_mskcc_2020:P-0010518
prad_cdk12_mskcc_2020:P-0011156
prad_cdk12_mskcc_2020:P-0011368
prad_cdk12_mskcc_2020:P-0012025
prad_cdk12_mskcc_2020:P-0012368
prad_cdk12_mskcc_2020:P-0014613
prad_cdk12_mskcc_2020:P-0015134
prad_cdk12_mskcc_2020:P-0016812
prad_cdk12_mskcc_2020:P-0020833
prad_cdk12_mskcc_2020:P-0025650
prad_cdk12_mskcc_2020:P-0027722
prad_cdk12_mskcc_2020:P-0022557
prad_cdk12_mskcc_2020:P-0021702
prad_cdk12_mskcc_2020:P-0021853
prad_cdk12_mskcc_2020:P-0006231
prad_pik3r1_msk_2021:P-0048600
prad_pik3r1_msk_2021:P-0052243
prad_pik3r1_msk_2021:P-0009044
prad_pik3r1_msk_2021:P-0043158
prad_pik3r1_msk_2021:P-0009399
prad_pik3r1_msk_2021:P-0033465
prad_pik3r1_msk_2021:P-0026238
prad_pik3r1_msk_2021:P-0058344
prad_pik3r1_msk_2021:P-0019624
prad_pik3r1_msk_2021:P-0013732
prad_pik3r1_msk_2021:P-0000725
prad_pik3r1_msk_2021:P-0002990
prad_pik3r1_msk_2021:P-0006602
prad_pik3r1_msk_2021:P-0009151
prad_pik3r1_msk_2021:P-0009565
prad_pik3r1_msk_2021:P-0009817
prad_pik3r1_msk_2021:P-0009982
prad_pik3r1_msk_2021:P-0010746
prad_pik3r1_msk_2021:P-0012643
prad_pik3r1_msk_2021:P-0012711
prad_pik3r1_msk_2021:P-0012995
prad_pik3r1_msk_2021:P-0015209
prad_pik3r1_msk_2021:P-0017987
prad_pik3r1_msk_2021:P-0023866
prad_pik3r1_msk_2021:P-0026153
prad_pik3r1_msk_2021:P-0026228
prad_pik3r1_msk_2021:P-0026673
prad_pik3r1_msk_2021:P-0027921
prad_pik3r1_msk_2021:P-0028741
prad_pik3r1_msk_2021:P-0028835
prad_pik3r1_msk_2021:P-0029523
prad_pik3r1_msk_2021:P-0030410
prad_pik3r1_msk_2021:P-0030736
prad_pik3r1_msk_2021:P-0030976
prad_pik3r1_msk_2021:P-0034472
prad_pik3r1_msk_2021:P-0036594
prad_pik3r1_msk_2021:P-0038585
prad_pik3r1_msk_2021:P-0040262
prad_pik3r1_msk_2021:P-0042035
prad_pik3r1_msk_2021:P-0042135
prad_pik3r1_msk_2021:P-0042144
prad_pik3r1_msk_2021:P-0043830
prad_pik3r1_msk_2021:P-0045291
prad_pik3r1_msk_2021:P-0046569
prad_pik3r1_msk_2021:P-0048357
prad_pik3r1_msk_2021:P-0048370
prad_pik3r1_msk_2021:P-0049900
prad_pik3r1_msk_2021:P-0053403
prad_pik3r1_msk_2021:P-0054666
prad_pik3r1_msk_2021:P-0001426
prad_pik3r1_msk_2021:P-0052272
prad_pik3r1_msk_2021:P-0047148
prad_pik3r1_msk_2021:P-0008441
prad_pik3r1_msk_2021:P-0045158
prad_pik3r1_msk_2021:P-0009656
prad_pik3r1_msk_2021:P-0018704
prad_pik3r1_msk_2021:P-0019819
prad_pik3r1_msk_2021:P-0023958
prad_pik3r1_msk_2021:P-0031579
prad_pik3r1_msk_2021:P-0023419
prad_pik3r1_msk_2021:P-0016941
prad_pik3r1_msk_2021:P-0038415
prad_pik3r1_msk_2021:P-0056951
prad_pik3r1_msk_2021:P-0014412
prad_pik3r1_msk_2021:P-0047751
prad_pik3r1_msk_2021:P-0053926
prad_pik3r1_msk_2021:P-0013858
prad_pik3r1_msk_2021:P-0047878
prad_pik3r1_msk_2021:P-0055491
prad_pik3r1_msk_2021:P-0011577
prad_pik3r1_msk_2021:P-0007533
prad_pik3r1_msk_2021:P-0015597
prad_pik3r1_msk_2021:P-0018886
prad_pik3r1_msk_2021:P-0019582
prad_pik3r1_msk_2021:P-0028784
prad_pik3r1_msk_2021:P-0036545
prad_pik3r1_msk_2021:P-0037458
prad_pik3r1_msk_2021:P-0040801
prad_pik3r1_msk_2021:P-0014004
prad_pik3r1_msk_2021:P-0018581
prad_pik3r1_msk_2021:P-0003695
prad_pik3r1_msk_2021:P-0049119
prad_pik3r1_msk_2021:P-0003925
prad_pik3r1_msk_2021:P-0044288
prad_pik3r1_msk_2021:P-0002516
prad_pik3r1_msk_2021:P-0003619
prad_pik3r1_msk_2021:P-0008206
prad_pik3r1_msk_2021:P-0008390
prad_pik3r1_msk_2021:P-0012834
prad_pik3r1_msk_2021:P-0013465
prad_pik3r1_msk_2021:P-0014235
prad_pik3r1_msk_2021:P-0018068
prad_pik3r1_msk_2021:P-0018627
prad_pik3r1_msk_2021:P-0025550
prad_pik3r1_msk_2021:P-0026808
prad_pik3r1_msk_2021:P-0034431
prad_pik3r1_msk_2021:P-0035911
prad_pik3r1_msk_2021:P-0042252
prad_pik3r1_msk_2021:P-0045146
prad_pik3r1_msk_2021:P-0050289
prad_pik3r1_msk_2021:P-0003442
prad_pik3r1_msk_2021:P-0027722
prad_pik3r1_msk_2021:P-0033832
prad_pik3r1_msk_2021:P-0005867
prad_pik3r1_msk_2021:P-0011368
prad_pik3r1_msk_2021:P-0012025
prad_pik3r1_msk_2021:P-0014613
prad_pik3r1_msk_2021:P-0020574
prad_pik3r1_msk_2021:P-0025650
prad_pik3r1_msk_2021:P-0049093
prad_pik3r1_msk_2021:P-0020424
prad_pik3r1_msk_2021:P-0052131
prad_pik3r1_msk_2021:P-0040088
prad_pik3r1_msk_2021:P-0054232
prad_pik3r1_msk_2021:P-0023741
prad_pik3r1_msk_2021:P-0049188
prad_pik3r1_msk_2021:P-0015058
prad_pik3r1_msk_2021:P-0022420
prad_pik3r1_msk_2021:P-0052415
prad_pik3r1_msk_2021:P-0000610
prad_pik3r1_msk_2021:P-0000935
prad_pik3r1_msk_2021:P-0001108
prad_pik3r1_msk_2021:P-0001153
prad_pik3r1_msk_2021:P-0001382
prad_pik3r1_msk_2021:P-0001698
prad_pik3r1_msk_2021:P-0001776
prad_pik3r1_msk_2021:P-0002123
prad_pik3r1_msk_2021:P-0002303
prad_pik3r1_msk_2021:P-0002564
prad_pik3r1_msk_2021:P-0002740
prad_pik3r1_msk_2021:P-0003390
prad_pik3r1_msk_2021:P-0003395
prad_pik3r1_msk_2021:P-0003538
prad_pik3r1_msk_2021:P-0003597
prad_pik3r1_msk_2021:P-0003602
prad_pik3r1_msk_2021:P-0004221
prad_pik3r1_msk_2021:P-0004312
prad_pik3r1_msk_2021:P-0004830
prad_pik3r1_msk_2021:P-0005098
prad_pik3r1_msk_2021:P-0005454
prad_pik3r1_msk_2021:P-0005460
prad_pik3r1_msk_2021:P-0005636
prad_pik3r1_msk_2021:P-0005697
prad_pik3r1_msk_2021:P-0005756
prad_pik3r1_msk_2021:P-0005956
prad_pik3r1_msk_2021:P-0006378
prad_pik3r1_msk_2021:P-0006440
prad_pik3r1_msk_2021:P-0006595
prad_pik3r1_msk_2021:P-0006815
prad_pik3r1_msk_2021:P-0006837
prad_pik3r1_msk_2021:P-0006905
prad_pik3r1_msk_2021:P-0007006
prad_pik3r1_msk_2021:P-0007358
prad_pik3r1_msk_2021:P-0007416
prad_pik3r1_msk_2021:P-0007576
prad_pik3r1_msk_2021:P-0007629
prad_pik3r1_msk_2021:P-0007749
prad_pik3r1_msk_2021:P-0007856
prad_pik3r1_msk_2021:P-0008074
prad_pik3r1_msk_2021:P-0008525
prad_pik3r1_msk_2021:P-0008869
prad_pik3r1_msk_2021:P-0008879
prad_pik3r1_msk_2021:P-0009352
prad_pik3r1_msk_2021:P-0009640
prad_pik3r1_msk_2021:P-0009989
prad_pik3r1_msk_2021:P-0010078
prad_pik3r1_msk_2021:P-0010959
prad_pik3r1_msk_2021:P-0011093
prad_pik3r1_msk_2021:P-0012321
prad_pik3r1_msk_2021:P-0012555
prad_pik3r1_msk_2021:P-0012630
prad_pik3r1_msk_2021:P-0013032
prad_pik3r1_msk_2021:P-0013457
prad_pik3r1_msk_2021:P-0013674
prad_pik3r1_msk_2021:P-0014080
prad_pik3r1_msk_2021:P-0014400
prad_pik3r1_msk_2021:P-0014531
prad_pik3r1_msk_2021:P-0014841
prad_pik3r1_msk_2021:P-0015015
prad_pik3r1_msk_2021:P-0015132
prad_pik3r1_msk_2021:P-0015250
prad_pik3r1_msk_2021:P-0015406
prad_pik3r1_msk_2021:P-0015448
prad_pik3r1_msk_2021:P-0016296
prad_pik3r1_msk_2021:P-0016396
prad_pik3r1_msk_2021:P-0016876
prad_pik3r1_msk_2021:P-0017041
prad_pik3r1_msk_2021:P-0017605
prad_pik3r1_msk_2021:P-0017892
prad_pik3r1_msk_2021:P-0018798
prad_pik3r1_msk_2021:P-0019781
prad_pik3r1_msk_2021:P-0019815
prad_pik3r1_msk_2021:P-0020237
prad_pik3r1_msk_2021:P-0020750
prad_pik3r1_msk_2021:P-0020844
prad_pik3r1_msk_2021:P-0020984
prad_pik3r1_msk_2021:P-0021023
prad_pik3r1_msk_2021:P-0021083
prad_pik3r1_msk_2021:P-0021297
prad_pik3r1_msk_2021:P-0021310
prad_pik3r1_msk_2021:P-0021342
prad_pik3r1_msk_2021:P-0021388
prad_pik3r1_msk_2021:P-0021597
prad_pik3r1_msk_2021:P-0021874
prad_pik3r1_msk_2021:P-0022070
prad_pik3r1_msk_2021:P-0022099
prad_pik3r1_msk_2021:P-0022343
prad_pik3r1_msk_2021:P-0022439
prad_pik3r1_msk_2021:P-0022672
prad_pik3r1_msk_2021:P-0022700
prad_pik3r1_msk_2021:P-0022825
prad_pik3r1_msk_2021:P-0023030
prad_pik3r1_msk_2021:P-0023345
prad_pik3r1_msk_2021:P-0023621
prad_pik3r1_msk_2021:P-0023838
prad_pik3r1_msk_2021:P-0023930
prad_pik3r1_msk_2021:P-0024140
prad_pik3r1_msk_2021:P-0024522
prad_pik3r1_msk_2021:P-0024534
prad_pik3r1_msk_2021:P-0024598
prad_pik3r1_msk_2021:P-0024898
prad_pik3r1_msk_2021:P-0025150
prad_pik3r1_msk_2021:P-0025494
prad_pik3r1_msk_2021:P-0026196
prad_pik3r1_msk_2021:P-0026240
prad_pik3r1_msk_2021:P-0026447
prad_pik3r1_msk_2021:P-0026871
prad_pik3r1_msk_2021:P-0027245
prad_pik3r1_msk_2021:P-0027453
prad_pik3r1_msk_2021:P-0027466
prad_pik3r1_msk_2021:P-0027874
prad_pik3r1_msk_2021:P-0028167
prad_pik3r1_msk_2021:P-0028569
prad_pik3r1_msk_2021:P-0028576
prad_pik3r1_msk_2021:P-0029948
prad_pik3r1_msk_2021:P-0030184
prad_pik3r1_msk_2021:P-0030384
prad_pik3r1_msk_2021:P-0030812
prad_pik3r1_msk_2021:P-0030842
prad_pik3r1_msk_2021:P-0030872
prad_pik3r1_msk_2021:P-0030943
prad_pik3r1_msk_2021:P-0031189
prad_pik3r1_msk_2021:P-0032379
prad_pik3r1_msk_2021:P-0032478
prad_pik3r1_msk_2021:P-0032801
prad_pik3r1_msk_2021:P-0033194
prad_pik3r1_msk_2021:P-0033300
prad_pik3r1_msk_2021:P-0033660
prad_pik3r1_msk_2021:P-0033961
prad_pik3r1_msk_2021:P-0034538
prad_pik3r1_msk_2021:P-0034946
prad_pik3r1_msk_2021:P-0035219
prad_pik3r1_msk_2021:P-0035221
prad_pik3r1_msk_2021:P-0035283
prad_pik3r1_msk_2021:P-0036120
prad_pik3r1_msk_2021:P-0036215
prad_pik3r1_msk_2021:P-0036349
prad_pik3r1_msk_2021:P-0036492
prad_pik3r1_msk_2021:P-0036555
prad_pik3r1_msk_2021:P-0036557
prad_pik3r1_msk_2021:P-0036677
prad_pik3r1_msk_2021:P-0037029
prad_pik3r1_msk_2021:P-0037177
prad_pik3r1_msk_2021:P-0038328
prad_pik3r1_msk_2021:P-0038349
prad_pik3r1_msk_2021:P-0038369
prad_pik3r1_msk_2021:P-0038412
prad_pik3r1_msk_2021:P-0038422
prad_pik3r1_msk_2021:P-0038856
prad_pik3r1_msk_2021:P-0039550
prad_pik3r1_msk_2021:P-0039771
prad_pik3r1_msk_2021:P-0039805
prad_pik3r1_msk_2021:P-0040207
prad_pik3r1_msk_2021:P-0040995
prad_pik3r1_msk_2021:P-0041659
prad_pik3r1_msk_2021:P-0041732
prad_pik3r1_msk_2021:P-0042249
prad_pik3r1_msk_2021:P-0042583
prad_pik3r1_msk_2021:P-0042663
prad_pik3r1_msk_2021:P-0042826
prad_pik3r1_msk_2021:P-0042957
prad_pik3r1_msk_2021:P-0043235
prad_pik3r1_msk_2021:P-0043853
prad_pik3r1_msk_2021:P-0044376
prad_pik3r1_msk_2021:P-0045399
prad_pik3r1_msk_2021:P-0045412
prad_pik3r1_msk_2021:P-0046812
prad_pik3r1_msk_2021:P-0048761
prad_pik3r1_msk_2021:P-0048955
prad_pik3r1_msk_2021:P-0049809
prad_pik3r1_msk_2021:P-0049886
prad_pik3r1_msk_2021:P-0049974
prad_pik3r1_msk_2021:P-0050169
prad_pik3r1_msk_2021:P-0050705
prad_pik3r1_msk_2021:P-0050716
prad_pik3r1_msk_2021:P-0051264
prad_pik3r1_msk_2021:P-0051311
prad_pik3r1_msk_2021:P-0051352
prad_pik3r1_msk_2021:P-0051820
prad_pik3r1_msk_2021:P-0052092
prad_pik3r1_msk_2021:P-0053406
prad_pik3r1_msk_2021:P-0053704
prad_pik3r1_msk_2021:P-0054218
prad_pik3r1_msk_2021:P-0054319
prad_pik3r1_msk_2021:P-0054506
prad_pik3r1_msk_2021:P-0054692
prad_pik3r1_msk_2021:P-0054763
prad_pik3r1_msk_2021:P-0055122
prad_pik3r1_msk_2021:P-0055380
prad_pik3r1_msk_2021:P-0055638
prad_pik3r1_msk_2021:P-0055685
prad_pik3r1_msk_2021:P-0055707
prad_pik3r1_msk_2021:P-0055712
prad_pik3r1_msk_2021:P-0056388
prad_pik3r1_msk_2021:P-0056943
prad_pik3r1_msk_2021:P-0057179
prad_pik3r1_msk_2021:P-0057414
prad_pik3r1_msk_2021:P-0057530
prad_pik3r1_msk_2021:P-0057634
prad_pik3r1_msk_2021:P-0061187
prad_pik3r1_msk_2021:P-0017491
prad_su2c_2019:6115320
prad_su2c_2019:9115175
prad_su2c_2019:97115281
prad_su2c_2019:9115515
prad_su2c_2019:97115005
prad_su2c_2019:13115465
prad_su2c_2019:9115184
prad_su2c_2019:5115648
prad_su2c_2019:9115524
prad_su2c_2019:9115571
prad_su2c_2019:6115399
prad_su2c_2019:96115273
prad_su2c_2019:9115418
prad_su2c_2019:96115494
prad_su2c_2019:96115623
prad_su2c_2019:1115578
prad_su2c_2019:96115640
prad_su2c_2019:96115639
prad_su2c_2019:6115385
prad_su2c_2019:5115024
prad_su2c_2019:9115585
prad_su2c_2019:97115079
prad_su2c_2019:96115626
prad_su2c_2019:9115109
prad_su2c_2019:97115449
prad_su2c_2019:96115630
prad_su2c_2019:6115286
prad_su2c_2019:6115114
prad_su2c_2019:9115108
prad_su2c_2019:9115045
prad_su2c_2019:13115262
prad_su2c_2019:1115161
prad_su2c_2019:9115425
prad_su2c_2019:9115570
prad_su2c_2019:97115071
prad_su2c_2019:1115245
prad_su2c_2019:6115322
prad_su2c_2019:97115003
prad_su2c_2019:9115566
prad_su2c_2019:96115480
prad_su2c_2019:96115146
prad_su2c_2019:6115395
prad_su2c_2019:9115173
prad_su2c_2019:5115290
prad_su2c_2019:6115392
prad_su2c_2019:96115274
prad_su2c_2019:97115376
prad_su2c_2019:1115311
prad_su2c_2019:5115129
prad_su2c_2019:5115650
prad_su2c_2019:6115403
prad_su2c_2019:1115244
prad_su2c_2019:5115614
prad_su2c_2019:97115006
prad_su2c_2019:96115622
prad_su2c_2019:5115409
prad_su2c_2019:96115138
prad_su2c_2019:96115508
prad_su2c_2019:97115337
prad_su2c_2019:9115340
prad_su2c_2019:5115195
prad_su2c_2019:1115308
prad_su2c_2019:97115166
prad_su2c_2019:5115407
prad_su2c_2019:97115335
prad_su2c_2019:5115032
prad_su2c_2019:9115339
prad_su2c_2019:97115151
prad_su2c_2019:96115143
prad_su2c_2019:96115500
prad_su2c_2019:5115506
prad_su2c_2019:9115539
prad_su2c_2019:6115117
prad_su2c_2019:96115641
prad_su2c_2019:5115028
prad_su2c_2019:5115196
prad_su2c_2019:97115561
prad_su2c_2019:1115525
prad_su2c_2019:96115266
prad_su2c_2019:5115258
prad_su2c_2019:97115365
prad_su2c_2019:97115095
prad_su2c_2019:1115574
prad_su2c_2019:6115121
prad_su2c_2019:6115600
prad_su2c_2019:96115292
prad_su2c_2019:96115482
prad_su2c_2019:96115490
prad_su2c_2019:96115631
prad_su2c_2019:1115200
prad_su2c_2019:1115468
prad_su2c_2019:5115034
prad_su2c_2019:96115643
prad_su2c_2019:97115454
prad_su2c_2019:5115057
prad_su2c_2019:97115007
prad_su2c_2019:1115020
prad_su2c_2019:1115087
prad_su2c_2019:1115091
prad_su2c_2019:1115092
prad_su2c_2019:1115307
prad_su2c_2019:5115075
prad_su2c_2019:5115412
prad_su2c_2019:5115611
prad_su2c_2019:5115613
prad_su2c_2019:6115118
prad_su2c_2019:6115251
prad_su2c_2019:6115295
prad_su2c_2019:6115317
prad_su2c_2019:6115321
prad_su2c_2019:6115383
prad_su2c_2019:6115386
prad_su2c_2019:6115391
prad_su2c_2019:6115599
prad_su2c_2019:9115061
prad_su2c_2019:9115171
prad_su2c_2019:9115174
prad_su2c_2019:9115182
prad_su2c_2019:9115185
prad_su2c_2019:9115338
prad_su2c_2019:9115341
prad_su2c_2019:9115519
prad_su2c_2019:9115551
prad_su2c_2019:13115443
prad_su2c_2019:96115479
prad_su2c_2019:96115491
prad_su2c_2019:96115493
prad_su2c_2019:96115497
prad_su2c_2019:97115363
prad_mcspc_mskcc_2020:P-0022557
prad_mcspc_mskcc_2020:P-0001774
prad_mcspc_mskcc_2020:P-0009044
prad_mcspc_mskcc_2020:P-0007930
prad_mcspc_mskcc_2020:P-0029645
prad_mcspc_mskcc_2020:P-0001092
prad_mcspc_mskcc_2020:P-0009399
prad_mcspc_mskcc_2020:P-0019624
prad_mcspc_mskcc_2020:P-0021711
prad_mcspc_mskcc_2020:P-0001244
prad_mcspc_mskcc_2020:P-0006602
prad_mcspc_mskcc_2020:P-0008920
prad_mcspc_mskcc_2020:P-0009151
prad_mcspc_mskcc_2020:P-0009565
prad_mcspc_mskcc_2020:P-0009817
prad_mcspc_mskcc_2020:P-0012181
prad_mcspc_mskcc_2020:P-0012643
prad_mcspc_mskcc_2020:P-0012711
prad_mcspc_mskcc_2020:P-0015209
prad_mcspc_mskcc_2020:P-0023866
prad_mcspc_mskcc_2020:P-0026673
prad_mcspc_mskcc_2020:P-0028741
prad_mcspc_mskcc_2020:P-0029523
prad_mcspc_mskcc_2020:P-0001426
prad_mcspc_mskcc_2020:P-0009656
prad_mcspc_mskcc_2020:P-0027380
prad_mcspc_mskcc_2020:P-0002123
prad_mcspc_mskcc_2020:P-0013858
prad_mcspc_mskcc_2020:P-0011577
prad_mcspc_mskcc_2020:P-0014004
prad_mcspc_mskcc_2020:P-0014299
prad_mcspc_mskcc_2020:P-0012928
prad_mcspc_mskcc_2020:P-0026808
prad_mcspc_mskcc_2020:P-0025650
prad_mcspc_mskcc_2020:P-0020424
prad_mcspc_mskcc_2020:P-0001153
prad_mcspc_mskcc_2020:P-0002431
prad_mcspc_mskcc_2020:P-0003395
prad_mcspc_mskcc_2020:P-0003519
prad_mcspc_mskcc_2020:P-0003538
prad_mcspc_mskcc_2020:P-0003799
prad_mcspc_mskcc_2020:P-0003939
prad_mcspc_mskcc_2020:P-0005098
prad_mcspc_mskcc_2020:P-0005213
prad_mcspc_mskcc_2020:P-0005217
prad_mcspc_mskcc_2020:P-0005454
prad_mcspc_mskcc_2020:P-0006057
prad_mcspc_mskcc_2020:P-0006595
prad_mcspc_mskcc_2020:P-0006603
prad_mcspc_mskcc_2020:P-0006815
prad_mcspc_mskcc_2020:P-0007219
prad_mcspc_mskcc_2020:P-0007359
prad_mcspc_mskcc_2020:P-0007629
prad_mcspc_mskcc_2020:P-0007749
prad_mcspc_mskcc_2020:P-0008077
prad_mcspc_mskcc_2020:P-0008330
prad_mcspc_mskcc_2020:P-0008869
prad_mcspc_mskcc_2020:P-0009640
prad_mcspc_mskcc_2020:P-0009787
prad_mcspc_mskcc_2020:P-0009989
prad_mcspc_mskcc_2020:P-0012555
prad_mcspc_mskcc_2020:P-0012630
prad_mcspc_mskcc_2020:P-0013037
prad_mcspc_mskcc_2020:P-0013115
prad_mcspc_mskcc_2020:P-0013674
prad_mcspc_mskcc_2020:P-0014530
prad_mcspc_mskcc_2020:P-0015767
prad_mcspc_mskcc_2020:P-0016396
prad_mcspc_mskcc_2020:P-0017041
prad_mcspc_mskcc_2020:P-0017548
prad_mcspc_mskcc_2020:P-0017892
prad_mcspc_mskcc_2020:P-0018798
prad_mcspc_mskcc_2020:P-0020023
prad_mcspc_mskcc_2020:P-0020078
prad_mcspc_mskcc_2020:P-0020750
prad_mcspc_mskcc_2020:P-0021874
prad_mcspc_mskcc_2020:P-0022439
prad_mcspc_mskcc_2020:P-0022672
prad_mcspc_mskcc_2020:P-0022700
prad_mcspc_mskcc_2020:P-0022825
prad_mcspc_mskcc_2020:P-0023249
prad_mcspc_mskcc_2020:P-0023276
prad_mcspc_mskcc_2020:P-0023838
prad_mcspc_mskcc_2020:P-0023874
prad_mcspc_mskcc_2020:P-0024140
prad_mcspc_mskcc_2020:P-0024249
prad_mcspc_mskcc_2020:P-0024316
prad_mcspc_mskcc_2020:P-0024522
prad_mcspc_mskcc_2020:P-0024600
prad_mcspc_mskcc_2020:P-0024898
prad_mcspc_mskcc_2020:P-0025150
prad_mcspc_mskcc_2020:P-0025494
prad_mcspc_mskcc_2020:P-0026237
prad_mcspc_mskcc_2020:P-0027160
prad_mcspc_mskcc_2020:P-0027245
prad_mcspc_mskcc_2020:P-0027453
prad_mcspc_mskcc_2020:P-0027466
prad_mcspc_mskcc_2020:P-0027874
prad_mcspc_mskcc_2020:P-0028167
prad_mcspc_mskcc_2020:P-0028551
prad_mcspc_mskcc_2020:P-0029087
prad_mcspc_mskcc_2020:P-0031771
prad_mcspc_mskcc_2020:P-0000442
prad_mskcc:PCA0087
prad_mskcc:PCA0104
prad_mskcc:PCA0206
prad_mskcc:PCA0215
prad_mskcc:PCA0211
prad_mskcc:PCA0119
prad_mskcc:PCA0128
prad_mskcc:PCA0208
prad_mskcc:PCA0130
prostate_dkfz_2018:ICGC_PCAL05
prostate_dkfz_2018:ICGC_PCA011
prostate_dkfz_2018:CPCG0075
prostate_dkfz_2018:ICGC_PCA028
prostate_dkfz_2018:ICGC_PCA039
prostate_dkfz_2018:ICGC_PCA116
prostate_dkfz_2018:ICGC_PCA176
prostate_dkfz_2018:ICGC_PCAL31
prostate_dkfz_2018:ICGC_PCA060
prostate_dkfz_2018:ICGC_PCA105
prostate_dkfz_2018:ICGC_PCA106
prostate_dkfz_2018:ICGC_PCAL36
prostate_dkfz_2018:ICGC_PCAL11
prostate_dkfz_2018:ICGC_PCA006
prostate_dkfz_2018:ICGC_PCA031
prostate_dkfz_2018:ICGC_PCA041
prostate_dkfz_2018:ICGC_PCA042
prostate_dkfz_2018:ICGC_PCA043
prostate_dkfz_2018:ICGC_PCA062
prostate_dkfz_2018:ICGC_PCA073
prostate_dkfz_2018:ICGC_PCAL20
prostate_dkfz_2018:ICGC_PCAL21
prostate_dkfz_2018:ICGC_PCAL33
prostate_dkfz_2018:ICGC_PCAL47
prostate_dkfz_2018:ICGC_PCA081
prostate_dkfz_2018:ICGC_PCA084
prostate_dkfz_2018:ICGC_PCA153
prostate_dkfz_2018:ICGC_PCA161
prostate_dkfz_2018:ICGC_PCA177
prostate_dkfz_2018:ICGC_PCA192
prostate_dkfz_2018:ICGC_PCA035
prostate_dkfz_2018:CPCG0094
prostate_dkfz_2018:ICGC_PCA099
nepc_wcm_2016:WCMC7520
nepc_wcm_2016:WCMC7
nepc_wcm_2016:WCMC192
nepc_wcm_2016:WCMC131
nepc_wcm_2016:WCMC199
nepc_wcm_2016:WCMC10
nepc_wcm_2016:WCMC91
nepc_wcm_2016:WCMC158
nepc_wcm_2016:WCMC164
nepc_wcm_2016:WCMC156
nepc_wcm_2016:WCMC201
nepc_wcm_2016:WCMC207
nepc_wcm_2016:WCMC7951
nepc_wcm_2016:WCMC10361
nepc_wcm_2016:WCMC20870
nepc_wcm_2016:WCMC21016

## Sheet: LNCaP-FGC
1 alteration the same	2-4 alterations the same	5-6 alterations the same
prad_tcga:TCGA-WW-A8ZI	prad_tcga:TCGA-VP-AA1N	prad_msk_stopsack_2021:P-0050196
prad_tcga:TCGA-CH-5752	prad_tcga:TCGA-KK-A7AY
prad_tcga:TCGA-EJ-5514	prad_tcga:TCGA-TP-A8TT
prad_tcga:TCGA-FC-A4JI	prad_tcga:TCGA-FC-7961
prad_tcga:TCGA-ZG-A9N3	prad_tcga:TCGA-KK-A8I6
prad_tcga:TCGA-VP-A87J	prad_tcga:TCGA-EJ-5542
prad_tcga:TCGA-QU-A6IM	prad_tcga:TCGA-EJ-A65J
prad_tcga:TCGA-XQ-A8TA	prad_tcga:TCGA-HC-7210
prad_tcga:TCGA-KK-A7AQ	prad_tcga:TCGA-V1-A9Z9
prad_tcga:TCGA-G9-6361	prad_tcga:TCGA-CH-5741
prad_tcga:TCGA-VP-A87K	prad_tcga:TCGA-HC-A9TE
prad_tcga:TCGA-J4-A83K	prad_tcga:TCGA-XK-AAIW
prad_tcga:TCGA-J9-A52C	prad_tcga:TCGA-KC-A4BV
prad_tcga:TCGA-CH-5751	prad_tcga:TCGA-CH-5769
prad_tcga:TCGA-EJ-5511	prad_tcga:TCGA-HC-A6AN
prad_tcga:TCGA-EJ-7783	prad_tcga:TCGA-HC-8265
prad_tcga:TCGA-EJ-7327	prad_tcga:TCGA-G9-6366
prad_tcga:TCGA-HC-A8CY	prad_tcga:TCGA-XK-AAK1
prad_tcga:TCGA-ZG-A9L1	prad_tcga:TCGA-4L-AA1F
prad_tcga:TCGA-HC-A6AP	prad_tcga:TCGA-HC-7738
prad_tcga:TCGA-KK-A6E3	prad_tcga:TCGA-HC-7212
prad_tcga:TCGA-G9-6363	prad_tcga:TCGA-EJ-A65D
prad_tcga:TCGA-HC-A6AL	prad_tcga:TCGA-KK-A6DY
prad_tcga:TCGA-HC-7080	prad_tcga:TCGA-QU-A6IL
prad_tcga:TCGA-EJ-A7NM	prad_tcga:TCGA-EJ-7218
prad_tcga:TCGA-XK-AAIR	prad_tcga:TCGA-YL-A8SA
prad_tcga:TCGA-TP-A8TV	prad_tcga:TCGA-VN-A88N
prad_tcga:TCGA-V1-A9OQ	prad_tcga:TCGA-EJ-8469
prad_tcga:TCGA-VP-A875	prad_tcga:TCGA-CH-5737
prad_tcga:TCGA-KK-A6E4	prad_tcga:TCGA-HC-7744
prad_tcga:TCGA-J4-A67S	prad_tcga:TCGA-HC-A9TH
prad_tcga:TCGA-G9-7525	prad_tcga:TCGA-V1-A9O9
prad_tcga:TCGA-ZG-A9MC	prad_tcga:TCGA-XJ-A9DI
prad_tcga:TCGA-ZG-A9L2	prad_tcga:TCGA-KK-A7B3
prad_tcga:TCGA-EJ-5525	prad_msk_stopsack_2021:P-0015570
prad_tcga:TCGA-EJ-5494	prad_msk_stopsack_2021:P-0024650
prad_tcga:TCGA-VP-A87H	prad_msk_stopsack_2021:P-0019937
prad_tcga:TCGA-M7-A722	prad_msk_stopsack_2021:P-0009892
prad_tcga:TCGA-HC-8262	prad_msk_stopsack_2021:P-0040838
prad_tcga:TCGA-ZG-A9LB	prad_msk_stopsack_2021:P-0024660
prad_tcga:TCGA-EJ-5507	prad_msk_stopsack_2021:P-0046590
prad_tcga:TCGA-KK-A59V	prad_msk_stopsack_2021:P-0035426
prad_tcga:TCGA-XJ-A9DX	prad_msk_stopsack_2021:P-0032288
prad_tcga:TCGA-KK-A7AW	prad_msk_stopsack_2021:P-0022120
prad_tcga:TCGA-EJ-A46F	prad_msk_stopsack_2021:P-0023067
prad_tcga:TCGA-KK-A7AU	prad_msk_stopsack_2021:P-0030013
prad_tcga:TCGA-G9-6496	prad_msk_stopsack_2021:P-0042035
prad_tcga:TCGA-YL-A8S9	prad_msk_stopsack_2021:P-0018315
prad_tcga:TCGA-J9-A8CN	prad_msk_stopsack_2021:P-0014076
prad_tcga:TCGA-ZG-A8QY	prad_msk_stopsack_2021:P-0034472
prad_tcga:TCGA-G9-6365	prad_msk_stopsack_2021:P-0026153
prad_tcga:TCGA-2A-A8W1	prad_msk_stopsack_2021:P-0007786
prad_tcga:TCGA-KK-A6E2	prad_msk_stopsack_2021:P-0015927
prad_tcga:TCGA-CH-5767	prad_msk_stopsack_2021:P-0033465
prad_tcga:TCGA-HC-A632	prad_msk_stopsack_2021:P-0001426
prad_tcga:TCGA-EJ-7123	prad_msk_stopsack_2021:P-0034070
prad_tcga:TCGA-EJ-7782	prad_msk_stopsack_2021:P-0035133
prad_tcga:TCGA-EJ-5497	prad_msk_stopsack_2021:P-0027380
prad_tcga:TCGA-J4-A83J	prad_msk_stopsack_2021:P-0018607
prad_tcga:TCGA-CH-5748	prad_msk_stopsack_2021:P-0000755
prad_tcga:TCGA-HC-7737	prad_msk_stopsack_2021:P-0005428
prad_tcga:TCGA-KC-A7F3	prad_msk_stopsack_2021:P-0012928
prad_tcga:TCGA-M7-A721	prad_msk_stopsack_2021:P-0030383
prad_tcga:TCGA-VN-A943	prad_msk_stopsack_2021:P-0021600
prad_tcga:TCGA-ZG-A8QW	prad_msk_stopsack_2021:P-0042711
prad_tcga:TCGA-HC-7817	prad_msk_stopsack_2021:P-0034845
prad_tcga:TCGA-J4-A67M	prad_msk_stopsack_2021:P-0031855
prad_tcga:TCGA-QU-A6IO	prad_msk_stopsack_2021:P-0007538
prad_tcga:TCGA-J4-A67O	prad_msk_stopsack_2021:P-0042249
prad_tcga:TCGA-G9-6373	prad_msk_stopsack_2021:P-0002990
prad_tcga:TCGA-KK-A8IA	prad_msk_stopsack_2021:P-0004910
prad_tcga:TCGA-ZG-A9LY	prad_mskcc_2017:P-0003541
prad_tcga:TCGA-CH-5768	prad_mskcc_2017:P-0006856
prad_tcga:TCGA-EJ-5517	prad_mskcc_2017:P-0008452
prad_tcga:TCGA-V1-A9Z8	prad_mskcc_2017:P-0007786
prad_tcga:TCGA-CH-5794	prad_mskcc_2017:P-0001426
prad_tcga:TCGA-YL-A9WY	prad_mskcc_2017:P-0001446
prad_tcga:TCGA-HC-7749	prad_mskcc_2017:P-0003468
prad_tcga:TCGA-ZG-A8QZ	prad_mskcc_2017:P-0000449
prad_tcga:TCGA-EJ-7318	prad_mskcc_2017:P-0000755
prad_tcga:TCGA-V1-A9ZR	prad_mskcc_2017:P-0005428
prad_tcga:TCGA-G9-7519	prad_mskcc_2017:P-0000966
prad_tcga:TCGA-ZG-A9L5	prad_mskcc_2017:P-0005768
prad_tcga:TCGA-XK-AAIV	prad_mskcc_2017:P-0007538
prad_tcga:TCGA-J4-AATZ	prad_p1000:TCGA-KK-A8ID
prad_tcga:TCGA-EJ-8472	prad_p1000:11-028L1_LUNG
prad_tcga:TCGA-HC-7213	prad_p1000:05-148E3_LIVER
prad_tcga:TCGA-ZG-A9LM	prad_p1000:SC_9105
prad_tcga:TCGA-ZG-A9LN	prad_p1000:PR-01-2492
prad_tcga:TCGA-KK-A59X	prad_p1000:TCGA-KK-A8I6
prad_tcga:TCGA-EJ-7325	prad_p1000:TCGA-EJ-5542
prad_tcga:TCGA-EJ-7312	prad_p1000:SC_9008
prad_tcga:TCGA-G9-6343	prad_p1000:PROS01448-6115250-SM-67ES4
prad_tcga:TCGA-G9-6354	prad_p1000:06-134H1_LN
prad_tcga:TCGA-J9-A8CP	prad_p1000:TCGA-XK-AAIW
prad_tcga:TCGA-XJ-A83G	prad_p1000:03-163S4_LIVER
prad_tcga:TCGA-M7-A720	prad_p1000:99-091J_LN
prad_tcga:TCGA-EJ-A65M	prad_p1000:SC_9058
prad_tcga:TCGA-J9-A8CM	prad_p1000:SC_9047
prad_tcga:TCGA-FC-A8O0	prad_p1000:PR-09-5094
prad_tcga:TCGA-HC-7081	prad_p1000:TCGA-KC-A4BV
prad_tcga:TCGA-HC-7748	prad_p1000:TCGA-J9-A52C
prad_tcga:TCGA-KK-A59Y	prad_p1000:PROS11496-6115236-SM-6CNPW
prad_tcga:TCGA-HC-7231	prad_p1000:PRAD-6115395.0-SM-7LGUH
prad_tcga:TCGA-EJ-5524	prad_p1000:PR-04-903
prad_tcga:TCGA-EJ-5516	prad_p1000:SC_9165
prad_tcga:TCGA-EJ-5498	prad_p1000:PROS01448-1115161-SM-5SGU1
prad_tcga:TCGA-EJ-7315	prad_p1000:PROS12319B-SU2C-06115114-SM-4W2N9
prad_tcga:TCGA-CH-5740	prad_p1000:SC_9144
prad_tcga:TCGA-YL-A8SL	prad_p1000:TCGA-HC-7212
prad_tcga:TCGA-J4-A67N	prad_p1000:PRAD-6115387.0-SM-7LGU9
prad_tcga:TCGA-HC-7742	prad_p1000:TCGA-G9-6365
prad_tcga:TCGA-HC-7209	prad_p1000:08-037F1_LIVER
prad_tcga:TCGA-YL-A9WL	prad_p1000:PROS12319B-SU2C-06115116-SM-4W2NB
prad_tcga:TCGA-G9-6339	prad_p1000:TCGA-KK-A6E0
prad_tcga:TCGA-V1-A9ZG	prad_p1000:SC_9158
prad_tcga:TCGA-2A-AAYU	prad_p1000:PRAD-6115403.0-SM-7LGUQ
prad_tcga:TCGA-CH-5744	prad_p1000:P04-1243
prad_tcga:TCGA-EJ-5521	prad_p1000:PRAD-6115390.0-SM-7LGUC
prad_tcga:TCGA-EJ-7314	prad_p1000:PM10
prad_tcga:TCGA-EJ-7788	prad_p1000:PROS01448-1115244-SM-5SGU6
prad_tcga:TCGA-G9-6332	prad_p1000:SC_9081
prad_tcga:TCGA-G9-6342	prad_p1000:PROS01448-6115219-SM-67ERS
prad_tcga:TCGA-G9-7522	prad_p1000:SC_9046
prad_tcga:TCGA-HC-A631	prad_p1000:PROS12319B-SU2C-06115117-SM-4W2NC
prad_tcga:TCGA-J4-A67K	prad_p1000:PM156
prad_tcga:TCGA-KK-A7B4	prad_p1000:05-011G4_LUNG
prad_tcga:TCGA-KK-A8IH	prad_p1000:PROS01448-6115227-SM-67ERU
prad_tcga:TCGA-KK-A8II	prad_p1000:PROS10448-SUTC.01115081-SM-4JC6A
prad_tcga:TCGA-KK-A8IM	prad_p1000:SC_9011
prad_tcga:TCGA-V1-A9OL	prad_p1000:TP_2032
prad_tcga:TCGA-VN-A88Q	prad_p1000:MO_1084
prad_tcga:TCGA-VP-A872	prad_p1000:TP_2034
prad_tcga:TCGA-XQ-A8TB	prad_p1000:12729
prad_tcga:TCGA-YL-A8HK	prad_p1000:03-130L_RETROPERITONEAL
prad_tcga:TCGA-YL-A8HL	prad_p1000:PROS11496-6115288-SM-6CNQ1
prad_tcga:TCGA-ZG-A9L4	prad_p1000:SC_9068
prad_tcga:TCGA-ZG-A9LZ	prad_p1000:SC_9129
prad_tcga:TCGA-EJ-5522	prad_p1000:TCGA-EJ-7327
prad_tcga:TCGA-EJ-5499	prad_p1000:01-120A1_LIVER
prad_tcga:TCGA-FC-7708	prad_p1000:TCGA-KK-A7B3
prad_tcga:TCGA-G9-6356	prad_cdk12_mskcc_2020:P-0012104
prad_tcga:TCGA-KK-A8IC	prad_cdk12_mskcc_2020:P-0011096
prad_tcga:TCGA-VN-A88L	prad_cdk12_mskcc_2020:P-0023249
prad_tcga:TCGA-KK-A6E7	prad_cdk12_mskcc_2020:P-0018315
prad_tcga:TCGA-HC-7230	prad_cdk12_mskcc_2020:P-0014076
prad_tcga:TCGA-KK-A6E1	prad_cdk12_mskcc_2020:P-0023546
prad_tcga:TCGA-EJ-7791	prad_cdk12_mskcc_2020:P-0026153
prad_tcga:TCGA-YL-A8SQ	prad_cdk12_mskcc_2020:P-0029523
prad_msk_stopsack_2021:P-0009393	prad_cdk12_mskcc_2020:P-0002990
prad_msk_stopsack_2021:P-0016538	prad_cdk12_mskcc_2020:P-0003541
prad_msk_stopsack_2021:P-0022557	prad_cdk12_mskcc_2020:P-0006856
prad_msk_stopsack_2021:P-0001774	prad_cdk12_mskcc_2020:P-0008452
prad_msk_stopsack_2021:P-0040786	prad_cdk12_mskcc_2020:P-0013732
prad_msk_stopsack_2021:P-0044915	prad_cdk12_mskcc_2020:P-0015209
prad_msk_stopsack_2021:P-0024219	prad_cdk12_mskcc_2020:P-0024913
prad_msk_stopsack_2021:P-0001325	prad_cdk12_mskcc_2020:P-0026228
prad_msk_stopsack_2021:P-0009044	prad_cdk12_mskcc_2020:P-0026673
prad_msk_stopsack_2021:P-0009699	prad_cdk12_mskcc_2020:P-0007786
prad_msk_stopsack_2021:P-0012104	prad_cdk12_mskcc_2020:P-0012711
prad_msk_stopsack_2021:P-0013000	prad_cdk12_mskcc_2020:P-0001426
prad_msk_stopsack_2021:P-0013502	prad_cdk12_mskcc_2020:P-0026774
prad_msk_stopsack_2021:P-0015211	prad_cdk12_mskcc_2020:P-0020792
prad_msk_stopsack_2021:P-0019580	prad_cdk12_mskcc_2020:P-0018607
prad_msk_stopsack_2021:P-0020784	prad_cdk12_mskcc_2020:P-0001446
prad_msk_stopsack_2021:P-0028071	prad_cdk12_mskcc_2020:P-0008960
prad_msk_stopsack_2021:P-0029645	prad_cdk12_mskcc_2020:P-0003468
prad_msk_stopsack_2021:P-0034039	prad_cdk12_mskcc_2020:P-0009656
prad_msk_stopsack_2021:P-0034277	prad_cdk12_mskcc_2020:P-0019933
prad_msk_stopsack_2021:P-0044899	prad_cdk12_mskcc_2020:P-0026409
prad_msk_stopsack_2021:P-0047234	prad_cdk12_mskcc_2020:P-0003945
prad_msk_stopsack_2021:P-0018870	prad_cdk12_mskcc_2020:P-0000966
prad_msk_stopsack_2021:P-0040262	prad_cdk12_mskcc_2020:P-0018605
prad_msk_stopsack_2021:P-0023866	prad_cdk12_mskcc_2020:P-0024538
prad_msk_stopsack_2021:P-0011096	prad_cdk12_mskcc_2020:P-0027210
prad_msk_stopsack_2021:P-0013401	prad_cdk12_mskcc_2020:P-0007098
prad_msk_stopsack_2021:P-0030976	prad_cdk12_mskcc_2020:P-0021342
prad_msk_stopsack_2021:P-0019624	prad_cdk12_mskcc_2020:P-0030521
prad_msk_stopsack_2021:P-0041584	prad_cdk12_mskcc_2020:P-0005768
prad_msk_stopsack_2021:P-0049730	prad_cdk12_mskcc_2020:P-0016548
prad_msk_stopsack_2021:P-0010309	prad_cdk12_mskcc_2020:P-0028167
prad_msk_stopsack_2021:P-0010746	prad_cdk12_mskcc_2020:P-0007538
prad_msk_stopsack_2021:P-0012181	prad_cdk12_mskcc_2020:P-0026447
prad_msk_stopsack_2021:P-0024657	prad_pik3r1_msk_2021:P-0023380
prad_msk_stopsack_2021:P-0026097	prad_pik3r1_msk_2021:P-0040786
prad_msk_stopsack_2021:P-0049427	prad_pik3r1_msk_2021:P-0011096
prad_msk_stopsack_2021:P-0023546	prad_pik3r1_msk_2021:P-0042035
prad_msk_stopsack_2021:P-0029523	prad_pik3r1_msk_2021:P-0014076
prad_msk_stopsack_2021:P-0009982	prad_pik3r1_msk_2021:P-0023546
prad_msk_stopsack_2021:P-0002990	prad_pik3r1_msk_2021:P-0026153
prad_msk_stopsack_2021:P-0006856	prad_pik3r1_msk_2021:P-0026238
prad_msk_stopsack_2021:P-0008452	prad_pik3r1_msk_2021:P-0002990
prad_msk_stopsack_2021:P-0013732	prad_pik3r1_msk_2021:P-0006856
prad_msk_stopsack_2021:P-0015209	prad_pik3r1_msk_2021:P-0013732
prad_msk_stopsack_2021:P-0026228	prad_pik3r1_msk_2021:P-0015209
prad_msk_stopsack_2021:P-0026673	prad_pik3r1_msk_2021:P-0024913
prad_msk_stopsack_2021:P-0043158	prad_pik3r1_msk_2021:P-0026228
prad_msk_stopsack_2021:P-0045856	prad_pik3r1_msk_2021:P-0026673
prad_msk_stopsack_2021:P-0048357	prad_pik3r1_msk_2021:P-0029523
prad_msk_stopsack_2021:P-0047475	prad_pik3r1_msk_2021:P-0043158
prad_msk_stopsack_2021:P-0008920	prad_pik3r1_msk_2021:P-0045856
prad_msk_stopsack_2021:P-0018147	prad_pik3r1_msk_2021:P-0048357
prad_msk_stopsack_2021:P-0000655	prad_pik3r1_msk_2021:P-0048370
prad_msk_stopsack_2021:P-0000725	prad_pik3r1_msk_2021:P-0012711
prad_msk_stopsack_2021:P-0001128	prad_pik3r1_msk_2021:P-0033465
prad_msk_stopsack_2021:P-0001244	prad_pik3r1_msk_2021:P-0001426
prad_msk_stopsack_2021:P-0005902	prad_pik3r1_msk_2021:P-0026774
prad_msk_stopsack_2021:P-0006393	prad_pik3r1_msk_2021:P-0055314
prad_msk_stopsack_2021:P-0006602	prad_pik3r1_msk_2021:P-0050552
prad_msk_stopsack_2021:P-0009151	prad_pik3r1_msk_2021:P-0020792
prad_msk_stopsack_2021:P-0009399	prad_pik3r1_msk_2021:P-0018607
prad_msk_stopsack_2021:P-0009565	prad_pik3r1_msk_2021:P-0003468
prad_msk_stopsack_2021:P-0009817	prad_pik3r1_msk_2021:P-0005806
prad_msk_stopsack_2021:P-0012643	prad_pik3r1_msk_2021:P-0015960
prad_msk_stopsack_2021:P-0012995	prad_pik3r1_msk_2021:P-0009656
prad_msk_stopsack_2021:P-0017708	prad_pik3r1_msk_2021:P-0055684
prad_msk_stopsack_2021:P-0017987	prad_pik3r1_msk_2021:P-0019933
prad_msk_stopsack_2021:P-0021711	prad_pik3r1_msk_2021:P-0005428
prad_msk_stopsack_2021:P-0022255	prad_pik3r1_msk_2021:P-0018605
prad_msk_stopsack_2021:P-0025759	prad_pik3r1_msk_2021:P-0024538
prad_msk_stopsack_2021:P-0028741	prad_pik3r1_msk_2021:P-0027210
prad_msk_stopsack_2021:P-0028835	prad_pik3r1_msk_2021:P-0039234
prad_msk_stopsack_2021:P-0030410	prad_pik3r1_msk_2021:P-0050289
prad_msk_stopsack_2021:P-0030736	prad_pik3r1_msk_2021:P-0051484
prad_msk_stopsack_2021:P-0036594	prad_pik3r1_msk_2021:P-0030521
prad_msk_stopsack_2021:P-0037866	prad_pik3r1_msk_2021:P-0021728
prad_msk_stopsack_2021:P-0038585	prad_pik3r1_msk_2021:P-0054154
prad_msk_stopsack_2021:P-0040764	prad_pik3r1_msk_2021:P-0005768
prad_msk_stopsack_2021:P-0042135	prad_pik3r1_msk_2021:P-0016548
prad_msk_stopsack_2021:P-0042144	prad_pik3r1_msk_2021:P-0028167
prad_msk_stopsack_2021:P-0042341	prad_pik3r1_msk_2021:P-0038198
prad_msk_stopsack_2021:P-0045291	prad_pik3r1_msk_2021:P-0007538
prad_msk_stopsack_2021:P-0046569	prad_pik3r1_msk_2021:P-0042249
prad_msk_stopsack_2021:P-0049900	prad_pik3r1_msk_2021:P-0025222
prad_msk_stopsack_2021:P-0018302	prad_pik3r1_msk_2021:P-0026447
prad_msk_stopsack_2021:P-0049438	prad_pik3r1_msk_2021:P-0048653
prad_msk_stopsack_2021:P-0026774	prad_su2c_2019:9115036
prad_msk_stopsack_2021:P-0008682	prad_su2c_2019:9115175
prad_msk_stopsack_2021:P-0019582	prad_su2c_2019:5115026
prad_msk_stopsack_2021:P-0043583	prad_su2c_2019:97115281
prad_msk_stopsack_2021:P-0050552	prad_su2c_2019:9115515
prad_msk_stopsack_2021:P-0025952	prad_su2c_2019:5115359
prad_msk_stopsack_2021:P-0000377	prad_su2c_2019:5115612
prad_msk_stopsack_2021:P-0019324	prad_su2c_2019:6115601
prad_msk_stopsack_2021:P-0019462	prad_su2c_2019:5115130
prad_msk_stopsack_2021:P-0021525	prad_su2c_2019:1115531
prad_msk_stopsack_2021:P-0025506	prad_su2c_2019:6115250
prad_msk_stopsack_2021:P-0036932	prad_su2c_2019:97115005
prad_msk_stopsack_2021:P-0038012	prad_su2c_2019:9115184
prad_msk_stopsack_2021:P-0023741	prad_su2c_2019:9115524
prad_msk_stopsack_2021:P-0020792	prad_su2c_2019:5115648
prad_msk_stopsack_2021:P-0033701	prad_su2c_2019:5115022
prad_msk_stopsack_2021:P-0049144	prad_su2c_2019:9115102
prad_msk_stopsack_2021:P-0036294	prad_su2c_2019:9115418
prad_msk_stopsack_2021:P-0020078	prad_su2c_2019:9115422
prad_msk_stopsack_2021:P-0023405	prad_su2c_2019:5115546
prad_msk_stopsack_2021:P-0042990	prad_su2c_2019:97115563
prad_msk_stopsack_2021:P-0002296	prad_su2c_2019:9115572
prad_msk_stopsack_2021:P-0015184	prad_su2c_2019:97115009
prad_msk_stopsack_2021:P-0007533	prad_su2c_2019:97115079
prad_msk_stopsack_2021:P-0001446	prad_su2c_2019:9115109
prad_msk_stopsack_2021:P-0003450	prad_su2c_2019:97115358
prad_msk_stopsack_2021:P-0009402	prad_su2c_2019:5115073
prad_msk_stopsack_2021:P-0014009	prad_su2c_2019:9115065
prad_msk_stopsack_2021:P-0014408	prad_su2c_2019:5115078
prad_msk_stopsack_2021:P-0015991	prad_su2c_2019:9115063
prad_msk_stopsack_2021:P-0031856	prad_su2c_2019:97115449
prad_msk_stopsack_2021:P-0048490	prad_su2c_2019:5115261
prad_msk_stopsack_2021:P-0001884	prad_su2c_2019:5115290
prad_msk_stopsack_2021:P-0017169	prad_su2c_2019:5115128
prad_msk_stopsack_2021:P-0023839	prad_su2c_2019:6115227
prad_msk_stopsack_2021:P-0013844	prad_su2c_2019:6115392
prad_msk_stopsack_2021:P-0003468	prad_su2c_2019:97115564
prad_msk_stopsack_2021:P-0003395	prad_su2c_2019:6115236
prad_msk_stopsack_2021:P-0039805	prad_su2c_2019:6115395
prad_msk_stopsack_2021:P-0009656	prad_su2c_2019:13115262
prad_msk_stopsack_2021:P-0000449	prad_su2c_2019:5115651
prad_msk_stopsack_2021:P-0006584	prad_su2c_2019:9115062
prad_msk_stopsack_2021:P-0019623	prad_su2c_2019:5115613
prad_msk_stopsack_2021:P-0019863	prad_su2c_2019:5115030
prad_msk_stopsack_2021:P-0029728	prad_su2c_2019:9115104
prad_msk_stopsack_2021:P-0034378	prad_su2c_2019:9115052
prad_msk_stopsack_2021:P-0024095	prad_su2c_2019:5115033
prad_msk_stopsack_2021:P-0025676	prad_su2c_2019:97115278
prad_msk_stopsack_2021:P-0021928	prad_su2c_2019:97115167
prad_msk_stopsack_2021:P-0004704	prad_su2c_2019:97115363
prad_msk_stopsack_2021:P-0026409	prad_su2c_2019:13115277
prad_msk_stopsack_2021:P-0003945	prad_su2c_2019:96115489
prad_msk_stopsack_2021:P-0018605	prad_su2c_2019:9115425
prad_msk_stopsack_2021:P-0024538	prad_su2c_2019:1115161
prad_msk_stopsack_2021:P-0027210	prad_su2c_2019:97115071
prad_msk_stopsack_2021:P-0039234	prad_su2c_2019:97115456
prad_msk_stopsack_2021:P-0050289	prad_su2c_2019:6115114
prad_msk_stopsack_2021:P-0008461	prad_su2c_2019:9115416
prad_msk_stopsack_2021:P-0014701	prad_su2c_2019:9115108
prad_msk_stopsack_2021:P-0008098	prad_su2c_2019:9115420
prad_msk_stopsack_2021:P-0015345	prad_su2c_2019:97115003
prad_msk_stopsack_2021:P-0004910	prad_su2c_2019:5115410
prad_msk_stopsack_2021:P-0000441	prad_su2c_2019:97115375
prad_msk_stopsack_2021:P-0001071	prad_su2c_2019:97115561
prad_msk_stopsack_2021:P-0004448	prad_su2c_2019:9115111
prad_msk_stopsack_2021:P-0004489	prad_su2c_2019:9115181
prad_msk_stopsack_2021:P-0005344	prad_su2c_2019:6115403
prad_msk_stopsack_2021:P-0005374	prad_su2c_2019:9115568
prad_msk_stopsack_2021:P-0008315	prad_su2c_2019:1115083
prad_msk_stopsack_2021:P-0010382	prad_su2c_2019:96115473
prad_msk_stopsack_2021:P-0011155	prad_su2c_2019:9115325
prad_msk_stopsack_2021:P-0011290	prad_su2c_2019:6115390
prad_msk_stopsack_2021:P-0011368	prad_su2c_2019:96115143
prad_msk_stopsack_2021:P-0016883	prad_su2c_2019:5115650
prad_msk_stopsack_2021:P-0021355	prad_su2c_2019:5115548
prad_msk_stopsack_2021:P-0021561	prad_su2c_2019:9115171
prad_msk_stopsack_2021:P-0023170	prad_su2c_2019:9115580
prad_msk_stopsack_2021:P-0030625	prad_su2c_2019:5115327
prad_msk_stopsack_2021:P-0032212	prad_su2c_2019:1115244
prad_msk_stopsack_2021:P-0041059	prad_su2c_2019:97115558
prad_msk_stopsack_2021:P-0044808	prad_su2c_2019:97115007
prad_msk_stopsack_2021:P-0044927	prad_su2c_2019:97115560
prad_msk_stopsack_2021:P-0047211	prad_su2c_2019:6115219
prad_msk_stopsack_2021:P-0027593	prad_su2c_2019:9115339
prad_msk_stopsack_2021:P-0001297	prad_su2c_2019:9115049
prad_msk_stopsack_2021:P-0004474	prad_su2c_2019:97115337
prad_msk_stopsack_2021:P-0008655	prad_su2c_2019:9115340
prad_msk_stopsack_2021:P-0018489	prad_su2c_2019:5115255
prad_msk_stopsack_2021:P-0022179	prad_su2c_2019:5115506
prad_msk_stopsack_2021:P-0027197	prad_su2c_2019:5115259
prad_msk_stopsack_2021:P-0034876	prad_su2c_2019:97115335
prad_msk_stopsack_2021:P-0035809	prad_su2c_2019:5115076
prad_msk_stopsack_2021:P-0042174	prad_su2c_2019:5115260
prad_msk_stopsack_2021:P-0029843	prad_su2c_2019:5115405
prad_msk_stopsack_2021:P-0021728	prad_su2c_2019:5115528
prad_msk_stopsack_2021:P-0043520	prad_su2c_2019:5115608
prad_msk_stopsack_2021:P-0029087	prad_su2c_2019:9115041
prad_msk_stopsack_2021:P-0022114	prad_su2c_2019:9115519
prad_msk_stopsack_2021:P-0030666	prad_su2c_2019:97115131
prad_msk_stopsack_2021:P-0031270	prad_su2c_2019:97115151
prad_msk_stopsack_2021:P-0036507	prad_su2c_2019:6115288
prad_msk_stopsack_2021:P-0039771	prad_su2c_2019:1115468
prad_msk_stopsack_2021:P-0042680	prad_su2c_2019:6115117
prad_msk_stopsack_2021:P-0047878	prad_su2c_2019:6115598
prad_msk_stopsack_2021:P-0044058	prad_su2c_2019:96115207
prad_msk_stopsack_2021:P-0005768	prad_su2c_2019:1115362
prad_msk_stopsack_2021:P-0016548	prad_su2c_2019:6115593
prad_msk_stopsack_2021:P-0028167	prad_su2c_2019:9115047
prad_msk_stopsack_2021:P-0038198	prad_su2c_2019:5115199
prad_msk_stopsack_2021:P-0049601	prad_su2c_2019:5115187
prad_msk_stopsack_2021:P-0003971	prad_mcspc_mskcc_2020:P-0009006
prad_msk_stopsack_2021:P-0014400	prad_mcspc_mskcc_2020:P-0024660
prad_msk_stopsack_2021:P-0030465	prad_mcspc_mskcc_2020:P-0022120
prad_msk_stopsack_2021:P-0040136	prad_mcspc_mskcc_2020:P-0014076
prad_msk_stopsack_2021:P-0040742	prad_mcspc_mskcc_2020:P-0029523
prad_msk_stopsack_2021:P-0021823	prad_mcspc_mskcc_2020:P-0015209
prad_msk_stopsack_2021:P-0012109	prad_mcspc_mskcc_2020:P-0026673
prad_msk_stopsack_2021:P-0000659	prad_mcspc_mskcc_2020:P-0012711
prad_msk_stopsack_2021:P-0018217	prad_mcspc_mskcc_2020:P-0001426
prad_msk_stopsack_2021:P-0032701	prad_mcspc_mskcc_2020:P-0026774
prad_msk_stopsack_2021:P-0036427	prad_mcspc_mskcc_2020:P-0008682
prad_msk_stopsack_2021:P-0006378	prad_mcspc_mskcc_2020:P-0027380
prad_msk_stopsack_2021:P-0032801	prad_mcspc_mskcc_2020:P-0009656
prad_msk_stopsack_2021:P-0026447	prad_mcspc_mskcc_2020:P-0026409
prad_msk_stopsack_2021:P-0035208	prad_mcspc_mskcc_2020:P-0012928
prad_msk_stopsack_2021:P-0017097	prad_mcspc_mskcc_2020:P-0021728
prad_msk_stopsack_2021:P-0039648	prad_mcspc_mskcc_2020:P-0028167
prad_msk_stopsack_2021:P-0021310	prad_mcspc_mskcc_2020:P-0002334
prad_msk_stopsack_2021:P-0000431	prad_mcspc_mskcc_2020:P-0025222
prad_msk_stopsack_2021:P-0000442	prad_mskcc:PCA0209
prad_msk_stopsack_2021:P-0001337	prad_mskcc:PCA0058
prad_msk_stopsack_2021:P-0003052	prad_mskcc:PCA0215
prad_msk_stopsack_2021:P-0003602	prad_mskcc:PCA0194
prad_msk_stopsack_2021:P-0007025	prad_mskcc:PCA0184
prad_msk_stopsack_2021:P-0007629	prad_mskcc:PCA0127
prad_msk_stopsack_2021:P-0009990	prad_mskcc:PCA0002
prad_msk_stopsack_2021:P-0010034	prad_mskcc:PCA0182
prad_msk_stopsack_2021:P-0010075	prad_mskcc:PCA0210
prad_msk_stopsack_2021:P-0010518	prostate_dkfz_2018:ICGC_PCA125
prad_msk_stopsack_2021:P-0010731	prostate_dkfz_2018:ICGC_PCAL11
prad_msk_stopsack_2021:P-0012513	prostate_dkfz_2018:ICGC_PCA044
prad_msk_stopsack_2021:P-0013245	prostate_dkfz_2018:ICGC_PCAL05
prad_msk_stopsack_2021:P-0013858	nepc_wcm_2016:WCMC158
prad_msk_stopsack_2021:P-0014395	nepc_wcm_2016:WCMC162
prad_msk_stopsack_2021:P-0015132
prad_msk_stopsack_2021:P-0015836
prad_msk_stopsack_2021:P-0016004
prad_msk_stopsack_2021:P-0016214
prad_msk_stopsack_2021:P-0016895
prad_msk_stopsack_2021:P-0017892
prad_msk_stopsack_2021:P-0018178
prad_msk_stopsack_2021:P-0018395
prad_msk_stopsack_2021:P-0020023
prad_msk_stopsack_2021:P-0022559
prad_msk_stopsack_2021:P-0023307
prad_msk_stopsack_2021:P-0023625
prad_msk_stopsack_2021:P-0023663
prad_msk_stopsack_2021:P-0024996
prad_msk_stopsack_2021:P-0027272
prad_msk_stopsack_2021:P-0027874
prad_msk_stopsack_2021:P-0028306
prad_msk_stopsack_2021:P-0029405
prad_msk_stopsack_2021:P-0030109
prad_msk_stopsack_2021:P-0030730
prad_msk_stopsack_2021:P-0030842
prad_msk_stopsack_2021:P-0032601
prad_msk_stopsack_2021:P-0033488
prad_msk_stopsack_2021:P-0033554
prad_msk_stopsack_2021:P-0033971
prad_msk_stopsack_2021:P-0035445
prad_msk_stopsack_2021:P-0036352
prad_msk_stopsack_2021:P-0036757
prad_msk_stopsack_2021:P-0037022
prad_msk_stopsack_2021:P-0037140
prad_msk_stopsack_2021:P-0037969
prad_msk_stopsack_2021:P-0038299
prad_msk_stopsack_2021:P-0038808
prad_msk_stopsack_2021:P-0039402
prad_msk_stopsack_2021:P-0041102
prad_msk_stopsack_2021:P-0041628
prad_msk_stopsack_2021:P-0041957
prad_msk_stopsack_2021:P-0042476
prad_msk_stopsack_2021:P-0043235
prad_msk_stopsack_2021:P-0043336
prad_msk_stopsack_2021:P-0043655
prad_msk_stopsack_2021:P-0045357
prad_msk_stopsack_2021:P-0045642
prad_msk_stopsack_2021:P-0047751
prad_msk_stopsack_2021:P-0048955
prad_msk_stopsack_2021:P-0049068
prad_msk_stopsack_2021:P-0019520
prad_msk_stopsack_2021:P-0039351
prad_msk_stopsack_2021:P-0001774
prad_msk_stopsack_2021:P-0001325
prad_msk_stopsack_2021:P-0009044
prad_msk_stopsack_2021:P-0001092
prad_msk_stopsack_2021:P-0000655
prad_msk_stopsack_2021:P-0000725
prad_msk_stopsack_2021:P-0001128
prad_msk_stopsack_2021:P-0001244
prad_msk_stopsack_2021:P-0005902
prad_msk_stopsack_2021:P-0006393
prad_msk_stopsack_2021:P-0006602
prad_msk_stopsack_2021:P-0008920
prad_msk_stopsack_2021:P-0009151
prad_msk_stopsack_2021:P-0000640
prad_msk_stopsack_2021:P-0008682
prad_msk_stopsack_2021:P-0000377
prad_msk_stopsack_2021:P-0003626
prad_msk_stopsack_2021:P-0005454
prad_msk_stopsack_2021:P-0002296
prad_msk_stopsack_2021:P-0007533
prad_msk_stopsack_2021:P-0003450
prad_msk_stopsack_2021:P-0001884
prad_msk_stopsack_2021:P-0000683
prad_msk_stopsack_2021:P-0003395
prad_msk_stopsack_2021:P-0004312
prad_msk_stopsack_2021:P-0007043
prad_msk_stopsack_2021:P-0005806
prad_msk_stopsack_2021:P-0003665
prad_msk_stopsack_2021:P-0000935
prad_msk_stopsack_2021:P-0003040
prad_mskcc_2017:P-0008960
prad_msk_stopsack_2021:P-0006584
prad_msk_stopsack_2021:P-0004482
prad_msk_stopsack_2021:P-0004704
prad_msk_stopsack_2021:P-0008461
prad_msk_stopsack_2021:P-0000441
prad_msk_stopsack_2021:P-0001071
prad_msk_stopsack_2021:P-0003597
prad_msk_stopsack_2021:P-0004448
prad_msk_stopsack_2021:P-0004489
prad_msk_stopsack_2021:P-0005344
prad_msk_stopsack_2021:P-0005374
prad_msk_stopsack_2021:P-0008098
prad_msk_stopsack_2021:P-0008315
prad_msk_stopsack_2021:P-0000560
prad_msk_stopsack_2021:P-0001297
prad_msk_stopsack_2021:P-0008655
prad_msk_stopsack_2021:P-0007098
prad_msk_stopsack_2021:P-0002901
prad_msk_stopsack_2021:P-0000659
prad_msk_stopsack_2021:P-0000140
prad_mskcc_2017:P-0000318
prad_msk_stopsack_2021:P-0000610
prad_msk_stopsack_2021:P-0000828
prad_msk_stopsack_2021:P-0000888
prad_msk_stopsack_2021:P-0001108
prad_mskcc_2017:P-0001141
prad_msk_stopsack_2021:P-0001274
prad_msk_stopsack_2021:P-0001698
prad_msk_stopsack_2021:P-0002123
prad_msk_stopsack_2021:P-0002149
prad_msk_stopsack_2021:P-0002364
prad_msk_stopsack_2021:P-0002382
prad_msk_stopsack_2021:P-0002961
prad_msk_stopsack_2021:P-0002974
prad_msk_stopsack_2021:P-0002999
prad_msk_stopsack_2021:P-0003033
prad_mskcc_2017:P-0003226
prad_mskcc_2017:P-0003419
prad_msk_stopsack_2021:P-0003535
prad_msk_stopsack_2021:P-0003758
prad_msk_stopsack_2021:P-0004826
prad_msk_stopsack_2021:P-0005045
prad_msk_stopsack_2021:P-0005436
prad_msk_stopsack_2021:P-0005596
prad_msk_stopsack_2021:P-0006389
prad_msk_stopsack_2021:P-0006635
prad_msk_stopsack_2021:P-0006670
prad_msk_stopsack_2021:P-0006994
prad_msk_stopsack_2021:P-0007547
prad_msk_stopsack_2021:P-0007749
prad_msk_stopsack_2021:P-0008074
prad_msk_stopsack_2021:P-0008206
prad_msk_stopsack_2021:P-0008852
prad_msk_stopsack_2021:P-0008966
prad_msk_stopsack_2021:P-0000431
prad_msk_stopsack_2021:P-0000442
prad_msk_stopsack_2021:P-0001337
prad_msk_stopsack_2021:P-0003052
prad_msk_stopsack_2021:P-0003602
prad_mskcc_2017:P-0004311
prad_mskcc_2017:P-0006905
prad_msk_stopsack_2021:P-0007025
prad_msk_stopsack_2021:P-0007629
prad_p1000:TCGA-XJ-A9DX
prad_p1000:PR-0415
prad_p1000:PM121
prad_p1000:SC_9097
prad_p1000:AAPC-IP_LG-083-Tumor-SM-3NC7C
prad_p1000:SC_9073
prad_p1000:TCGA-V1-A9Z9
prad_p1000:P03-2620
prad_p1000:P06-1125
prad_p1000:TCGA-EJ-A65J
prad_p1000:TCGA-EJ-7791
prad_p1000:TCGA-HC-7210
prad_p1000:TCGA-VP-AA1N
prad_p1000:10680
prad_p1000:05-116F_LUNG
prad_p1000:98-328K_PERITONEUM
prad_p1000:05-217L3_LUNG
prad_p1000:PROS12319B-SU2C-06115115-SM-4W2NA
prad_p1000:TCGA-EJ-5525
prad_p1000:PROS11496-6115322-SM-6CNQ6
prad_p1000:AAPC-STID0000011580-Tumor-SM-2XU1G
prad_p1000:TCGA-HC-7080
prad_p1000:MO_1139
prad_p1000:PROS01448-DFCI.10-448.P29-SM-5CQ4S
prad_p1000:TCGA-VP-A875
prad_p1000:PROS01448-DFCI.10-448.P42-SM-5CQ55
prad_p1000:PROS11496-6115317-SM-6CNQ2
prad_p1000:24854
prad_p1000:TCGA-G9-7525
prad_p1000:12728
prad_p1000:AAPC-STID0000011640-Tumor-SM-2XU1H
prad_p1000:P05-2212
prad_p1000:PR-01-2554
prad_p1000:TCGA-XK-AAIR
prad_p1000:TCGA-ZG-A9L2
prad_p1000:SC_9123
prad_p1000:12-021H4_LIVER
prad_p1000:SC_9048
prad_p1000:SC_9091
prad_p1000:SC_9121
prad_p1000:TCGA-EJ-A65D
prad_p1000:MO_1012
prad_p1000:PROS11496-6115286-SM-6CNPY
prad_p1000:SC_9019
prad_p1000:TCGA-CH-5752
prad_p1000:TCGA-EJ-5494
prad_p1000:TCGA-HC-7738
prad_p1000:TCGA-HC-8262
prad_p1000:TCGA-M7-A722
prad_p1000:TCGA-QU-A6IM
prad_p1000:TCGA-ZG-A9LB
prad_p1000:PRAD-01115245-SM-6WZF3
prad_p1000:TCGA-KK-A6DY
prad_p1000:08-093J1_LN
prad_p1000:99-064O_LN
prad_p1000:PRAD-01115249-SM-6VZ7K
prad_p1000:PM154
prad_p1000:TCGA-FC-A6HD
prad_p1000:TCGA-KC-A4BN
prad_p1000:TCGA-G9-6366
prad_p1000:05-165O_ADRENAL
prad_p1000:TCGA-HC-7817
prad_p1000:TCGA-J4-A67M
prad_p1000:TCGA-KK-A59V
prad_p1000:TCGA-ZG-A8QW
prad_p1000:TCGA-HC-8257
prad_p1000:PR-00-160
prad_p1000:PRAD-6115394.0-SM-7LGUG
prad_p1000:TP_2061
prad_p1000:TCGA-KK-A8IA
prad_p1000:SC_9127
prad_p1000:TCGA-VN-A88N
prad_p1000:TCGA-ZG-A9LN
prad_p1000:PR-01-2382
prad_p1000:PROS01448-DFCI.10-448.P20-SM-5CQ5F
prad_p1000:TCGA-CH-5768
prad_p1000:TCGA-KK-A59X
prad_p1000:PROS10448-SUTC.01115092-SM-4JC74
prad_p1000:PRAD-6115397.0-SM-7LGUJ
prad_p1000:TCGA-EJ-A65M
prad_p1000:SC_9006
prad_p1000:AAPC-STID0000021550-Tumor-SM-2XTYM
prad_p1000:TCGA-EJ-7218
prad_p1000:TCGA-XK-AAJA
prad_p1000:AAPC-STID0000002520-Tumor-SM-2XTZB
prad_p1000:PM161
prad_p1000:TP_2064
prad_p1000:AAPC-IP_LG-021-Tumor-SM-3NC63
prad_p1000:TCGA-HC-A9TH
prad_p1000:P09-2497
prad_p1000:SC_9017
prad_p1000:TCGA-4L-AA1F
prad_p1000:TCGA-ZG-A8QY
prad_p1000:PRAD-6115398.0-SM-7LGUK
prad_p1000:PROS10448-SUTC.01115082-SM-4JC6B
prad_p1000:MO_1241
prad_p1000:SC_9029
prad_p1000:SC_9021
prad_p1000:PRAD-6115401.0-SM-7LGUO
prad_p1000:08-006H1_LN
prad_p1000:MO_1130
prad_p1000:MO_1192
prad_p1000:MO_1202
prad_p1000:MO_1337
prad_p1000:PM119
prad_p1000:PRAD-6115391.0-SM-7LGUD
prad_p1000:PRAD-6115400.0-SM-7LGUM
prad_p1000:PROS01448-6115224-SM-67ERT
prad_p1000:SC_9035
prad_p1000:SC_9059
prad_p1000:SC_9063
prad_p1000:SC_9084
prad_p1000:SC_9092
prad_p1000:SC_9109
prad_p1000:SC_9132
prad_p1000:SC_9137
prad_p1000:SC_9153
prad_p1000:TP_2001
prad_p1000:99-090A2_LIVER
prad_p1000:MO_1008
prad_p1000:SC_9094
prad_p1000:SC_9096
prad_p1000:SC_9140
prad_p1000:01-087MM_BONE
prad_p1000:MO_1040
prad_p1000:MO_1132
prad_p1000:MO_1184
prad_p1000:MO_1316
prad_p1000:MO_1447
prad_p1000:PROS10448-SUTC.01115084-SM-4JC6H
prad_p1000:PROS11496-6115320-SM-6CNQ4
prad_p1000:PROS11496-6115321-SM-6CNQ5
prad_p1000:SC_9007
prad_p1000:SC_9056
prad_p1000:SC_9065
prad_p1000:SC_9145
prad_p1000:TP_2060
prad_p1000:11040
prad_p1000:AAPC-STID0000003057-Tumor-SM-2XTZT
prad_p1000:TCGA-FC-A8O0
prad_p1000:98-362B1_LN
prad_p1000:TP_2078
prad_p1000:SC_9080
prad_p1000:SC_9130
prad_p1000:PR-2740
prad_p1000:TCGA-EJ-5498
prad_p1000:TCGA-V1-A9O9
prad_p1000:TCGA-XJ-A9DI
prad_p1000:TCGA-XK-AAK1
prad_p1000:MO_1124
prad_p1000:03-139E3_RETROPERITONEAL
prad_p1000:03-192B_LUNG
prad_p1000:12-011I7_LN
prad_p1000:MO_1020
prad_p1000:MO_1054
prad_p1000:MO_1095
prad_p1000:MO_1161
prad_p1000:MO_1215
prad_p1000:MO_1249
prad_p1000:MO_1410
prad_p1000:P03-1334
prad_p1000:P03-1906
prad_p1000:P04-1084
prad_p1000:P06-4428
prad_p1000:P09-1580
prad_p1000:PM15
prad_p1000:PM159
prad_p1000:PR-01-1934
prad_p1000:PR-02-1082
prad_p1000:PR-02-2072
prad_p1000:PR-03-1026
prad_p1000:PR-06-1651
prad_p1000:PR-09-3566
prad_p1000:PR-1024
prad_p1000:PROS01448-DFCI.10-448.P05-SM-581SL
prad_p1000:PROS01448-DFCI.10-448.P15-SM-5CQ5D
prad_p1000:PROS01448-DFCI.10-448.P27-SM-5CQ5J
prad_p1000:PROS01448-1115183-SM-5SGU3
prad_p1000:PROS01448-6115233-SM-67ERW
prad_p1000:PROS10448-1115156-SM-5EEBN
prad_p1000:PROS10448-1115157-SM-5EEBO
prad_p1000:PROS11496-6115323-SM-6CNQ8
prad_p1000:PROS12319B-SU2C-06115123-SM-4W2NI
prad_p1000:SC_9024
prad_p1000:SC_9034
prad_p1000:SC_9086
prad_p1000:SC_9162
prad_p1000:SC_9173
prad_p1000:TCGA-2A-AAYU
prad_p1000:TCGA-CH-5741
prad_p1000:TCGA-G9-6332
prad_p1000:TCGA-HC-A9TE
prad_p1000:TCGA-HC-7213
prad_p1000:TCGA-HC-7742
prad_p1000:TCGA-J4-AATZ
prad_p1000:TCGA-KK-A8IH
prad_p1000:TCGA-KK-A8II
prad_p1000:TCGA-KK-A8IM
prad_p1000:TCGA-XQ-A8TA
prad_p1000:TCGA-XQ-A8TB
prad_p1000:TCGA-YL-A8HL
prad_p1000:TCGA-YL-A8SA
prad_p1000:TCGA-YL-A8SC
prad_p1000:TCGA-YL-A8SL
prad_p1000:TCGA-YL-A9WL
prad_p1000:TCGA-ZG-A9LM
prad_p1000:TP_2069
prad_p1000:10361
prad_p1000:10362
prad_p1000:21017
prad_p1000:AAPC-IP_LG-051-Tumor-SM-3NC6N
prad_p1000:MO_1118
prad_p1000:PR-3026
prad_p1000:SC_9043
prad_p1000:SI_9157
prad_p1000:TCGA-FC-7961
prad_p1000:TCGA-HC-A6AL
prad_p1000:TCGA-HC-7230
prad_p1000:TCGA-KK-A6E1
prad_p1000:TCGA-KK-A6E7
prad_p1000:SC_9163
prad_p1000:TCGA-HC-7747
prad_p1000:TCGA-KK-A8IL
prad_p1000:TCGA-V1-A8ML
prad_p1000:TCGA-CH-5769
prad_p1000:TCGA-EJ-7782
prad_p1000:TCGA-XJ-A9DK
prad_p1000:SC_9032
prad_p1000:SC_9136
prad_p1000:TCGA-HC-8216
prad_cdk12_mskcc_2020:P-0009393
prad_cdk12_mskcc_2020:P-0016538
prad_cdk12_mskcc_2020:P-0022557
prad_cdk12_mskcc_2020:P-0010015
prad_cdk12_mskcc_2020:P-0011377
prad_cdk12_mskcc_2020:P-0014598
prad_cdk12_mskcc_2020:P-0009044
prad_cdk12_mskcc_2020:P-0009699
prad_cdk12_mskcc_2020:P-0013000
prad_cdk12_mskcc_2020:P-0013502
prad_cdk12_mskcc_2020:P-0015211
prad_cdk12_mskcc_2020:P-0019580
prad_cdk12_mskcc_2020:P-0020784
prad_cdk12_mskcc_2020:P-0028071
prad_cdk12_mskcc_2020:P-0034039
prad_cdk12_mskcc_2020:P-0022611
prad_cdk12_mskcc_2020:P-0026395
prad_cdk12_mskcc_2020:P-0023866
prad_cdk12_mskcc_2020:P-0013401
prad_cdk12_mskcc_2020:P-0030976
prad_cdk12_mskcc_2020:P-0019624
prad_cdk12_mskcc_2020:P-0010309
prad_cdk12_mskcc_2020:P-0010746
prad_cdk12_mskcc_2020:P-0012181
prad_cdk12_mskcc_2020:P-0026097
prad_cdk12_mskcc_2020:P-0009982
prad_cdk12_mskcc_2020:P-0006602
prad_cdk12_mskcc_2020:P-0008920
prad_cdk12_mskcc_2020:P-0000655
prad_cdk12_mskcc_2020:P-0000725
prad_cdk12_mskcc_2020:P-0001128
prad_cdk12_mskcc_2020:P-0001244
prad_cdk12_mskcc_2020:P-0001639
prad_cdk12_mskcc_2020:P-0005902
prad_cdk12_mskcc_2020:P-0006393
prad_cdk12_mskcc_2020:P-0009151
prad_cdk12_mskcc_2020:P-0009399
prad_cdk12_mskcc_2020:P-0009565
prad_cdk12_mskcc_2020:P-0009817
prad_cdk12_mskcc_2020:P-0012643
prad_cdk12_mskcc_2020:P-0012995
prad_cdk12_mskcc_2020:P-0017708
prad_cdk12_mskcc_2020:P-0017987
prad_cdk12_mskcc_2020:P-0021711
prad_cdk12_mskcc_2020:P-0022255
prad_cdk12_mskcc_2020:P-0025759
prad_cdk12_mskcc_2020:P-0027921
prad_cdk12_mskcc_2020:P-0028741
prad_cdk12_mskcc_2020:P-0030410
prad_cdk12_mskcc_2020:P-0030736
prad_cdk12_mskcc_2020:P-0036594
prad_cdk12_mskcc_2020:P-0018302
prad_cdk12_mskcc_2020:P-0013808
prad_cdk12_mskcc_2020:P-0019582
prad_cdk12_mskcc_2020:P-0000377
prad_cdk12_mskcc_2020:P-0019324
prad_cdk12_mskcc_2020:P-0019462
prad_cdk12_mskcc_2020:P-0021525
prad_cdk12_mskcc_2020:P-0025506
prad_cdk12_mskcc_2020:P-0023741
prad_cdk12_mskcc_2020:P-0003626
prad_cdk12_mskcc_2020:P-0005454
prad_cdk12_mskcc_2020:P-0012197
prad_cdk12_mskcc_2020:P-0020984
prad_cdk12_mskcc_2020:P-0010178
prad_cdk12_mskcc_2020:P-0014438
prad_cdk12_mskcc_2020:P-0022437
prad_cdk12_mskcc_2020:P-0020078
prad_cdk12_mskcc_2020:P-0015184
prad_cdk12_mskcc_2020:P-0023666
prad_cdk12_mskcc_2020:P-0027722
prad_cdk12_mskcc_2020:P-0007533
prad_cdk12_mskcc_2020:P-0003450
prad_cdk12_mskcc_2020:P-0009402
prad_cdk12_mskcc_2020:P-0014009
prad_cdk12_mskcc_2020:P-0014408
prad_cdk12_mskcc_2020:P-0015991
prad_cdk12_mskcc_2020:P-0001884
prad_cdk12_mskcc_2020:P-0017169
prad_cdk12_mskcc_2020:P-0023839
prad_cdk12_mskcc_2020:P-0000683
prad_cdk12_mskcc_2020:P-0003395
prad_cdk12_mskcc_2020:P-0004312
prad_cdk12_mskcc_2020:P-0007043
prad_cdk12_mskcc_2020:P-0023958
prad_cdk12_mskcc_2020:P-0005806
prad_cdk12_mskcc_2020:P-0015960
prad_cdk12_mskcc_2020:P-0018627
prad_cdk12_mskcc_2020:P-0000935
prad_cdk12_mskcc_2020:P-0001768
prad_cdk12_mskcc_2020:P-0002739
prad_cdk12_mskcc_2020:P-0003040
prad_cdk12_mskcc_2020:P-0007219
prad_cdk12_mskcc_2020:P-0007307
prad_cdk12_mskcc_2020:P-0009374
prad_cdk12_mskcc_2020:P-0009543
prad_cdk12_mskcc_2020:P-0011090
prad_cdk12_mskcc_2020:P-0013358
prad_cdk12_mskcc_2020:P-0013465
prad_cdk12_mskcc_2020:P-0013810
prad_cdk12_mskcc_2020:P-0014333
prad_cdk12_mskcc_2020:P-0016396
prad_cdk12_mskcc_2020:P-0017232
prad_cdk12_mskcc_2020:P-0017882
prad_cdk12_mskcc_2020:P-0017886
prad_cdk12_mskcc_2020:P-0021023
prad_cdk12_mskcc_2020:P-0021104
prad_cdk12_mskcc_2020:P-0025139
prad_cdk12_mskcc_2020:P-0025332
prad_cdk12_mskcc_2020:P-0025571
prad_cdk12_mskcc_2020:P-0026072
prad_cdk12_mskcc_2020:P-0032194
prad_cdk12_mskcc_2020:P-0007629
prad_cdk12_mskcc_2020:P-0000449
prad_cdk12_mskcc_2020:P-0006584
prad_cdk12_mskcc_2020:P-0019623
prad_cdk12_mskcc_2020:P-0019863
prad_cdk12_mskcc_2020:P-0025222
prad_cdk12_mskcc_2020:P-0029728
prad_cdk12_mskcc_2020:P-0034378
prad_cdk12_mskcc_2020:P-0012675
prad_cdk12_mskcc_2020:P-0024095
prad_cdk12_mskcc_2020:P-0024554
prad_cdk12_mskcc_2020:P-0025676
prad_cdk12_mskcc_2020:P-0004482
prad_cdk12_mskcc_2020:P-0021928
prad_cdk12_mskcc_2020:P-0004704
prad_cdk12_mskcc_2020:P-0005428
prad_cdk12_mskcc_2020:P-0008461
prad_cdk12_mskcc_2020:P-0014701
prad_cdk12_mskcc_2020:P-0008098
prad_cdk12_mskcc_2020:P-0015345
prad_cdk12_mskcc_2020:P-0000441
prad_cdk12_mskcc_2020:P-0004448
prad_cdk12_mskcc_2020:P-0004489
prad_cdk12_mskcc_2020:P-0005344
prad_cdk12_mskcc_2020:P-0005374
prad_cdk12_mskcc_2020:P-0007137
prad_cdk12_mskcc_2020:P-0008315
prad_cdk12_mskcc_2020:P-0008339
prad_cdk12_mskcc_2020:P-0011290
prad_cdk12_mskcc_2020:P-0011368
prad_cdk12_mskcc_2020:P-0014566
prad_cdk12_mskcc_2020:P-0016883
prad_cdk12_mskcc_2020:P-0021561
prad_cdk12_mskcc_2020:P-0023170
prad_cdk12_mskcc_2020:P-0030625
prad_cdk12_mskcc_2020:P-0031808
prad_cdk12_mskcc_2020:P-0032212
prad_cdk12_mskcc_2020:P-0027593
prad_cdk12_mskcc_2020:P-0001297
prad_cdk12_mskcc_2020:P-0008655
prad_cdk12_mskcc_2020:P-0018489
prad_cdk12_mskcc_2020:P-0022179
prad_cdk12_mskcc_2020:P-0002901
prad_cdk12_mskcc_2020:P-0029843
prad_cdk12_mskcc_2020:P-0015628
prad_cdk12_mskcc_2020:P-0021728
prad_cdk12_mskcc_2020:P-0025097
prad_cdk12_mskcc_2020:P-0012507
prad_cdk12_mskcc_2020:P-0031270
prad_cdk12_mskcc_2020:P-0012914
prad_cdk12_mskcc_2020:P-0014254
prad_cdk12_mskcc_2020:P-0033226
prad_cdk12_mskcc_2020:P-0003971
prad_cdk12_mskcc_2020:P-0014400
prad_cdk12_mskcc_2020:P-0030465
prad_cdk12_mskcc_2020:P-0029796
prad_cdk12_mskcc_2020:P-0021823
prad_cdk12_mskcc_2020:P-0016405
prad_cdk12_mskcc_2020:P-0012109
prad_cdk12_mskcc_2020:P-0000659
prad_cdk12_mskcc_2020:P-0018217
prad_cdk12_mskcc_2020:P-0031712
prad_cdk12_mskcc_2020:P-0003684
prad_cdk12_mskcc_2020:P-0031426
prad_cdk12_mskcc_2020:P-0018659
prad_cdk12_mskcc_2020:P-0000318
prad_cdk12_mskcc_2020:P-0000610
prad_cdk12_mskcc_2020:P-0000828
prad_cdk12_mskcc_2020:P-0001108
prad_cdk12_mskcc_2020:P-0001141
prad_cdk12_mskcc_2020:P-0001274
prad_cdk12_mskcc_2020:P-0001698
prad_cdk12_mskcc_2020:P-0002149
prad_cdk12_mskcc_2020:P-0002364
prad_cdk12_mskcc_2020:P-0002382
prad_cdk12_mskcc_2020:P-0002961
prad_cdk12_mskcc_2020:P-0002974
prad_cdk12_mskcc_2020:P-0002999
prad_cdk12_mskcc_2020:P-0003033
prad_cdk12_mskcc_2020:P-0003226
prad_cdk12_mskcc_2020:P-0003419
prad_cdk12_mskcc_2020:P-0003535
prad_cdk12_mskcc_2020:P-0004826
prad_cdk12_mskcc_2020:P-0005045
prad_cdk12_mskcc_2020:P-0005436
prad_cdk12_mskcc_2020:P-0005596
prad_cdk12_mskcc_2020:P-0006389
prad_cdk12_mskcc_2020:P-0006635
prad_cdk12_mskcc_2020:P-0006670
prad_cdk12_mskcc_2020:P-0006767
prad_cdk12_mskcc_2020:P-0006994
prad_cdk12_mskcc_2020:P-0007547
prad_cdk12_mskcc_2020:P-0007749
prad_cdk12_mskcc_2020:P-0008074
prad_cdk12_mskcc_2020:P-0008206
prad_cdk12_mskcc_2020:P-0008525
prad_cdk12_mskcc_2020:P-0008852
prad_cdk12_mskcc_2020:P-0008966
prad_cdk12_mskcc_2020:P-0009654
prad_cdk12_mskcc_2020:P-0009687
prad_cdk12_mskcc_2020:P-0010657
prad_cdk12_mskcc_2020:P-0011483
prad_cdk12_mskcc_2020:P-0012030
prad_cdk12_mskcc_2020:P-0012048
prad_cdk12_mskcc_2020:P-0012141
prad_cdk12_mskcc_2020:P-0012368
prad_cdk12_mskcc_2020:P-0013032
prad_cdk12_mskcc_2020:P-0013038
prad_cdk12_mskcc_2020:P-0013457
prad_cdk12_mskcc_2020:P-0013674
prad_cdk12_mskcc_2020:P-0013729
prad_cdk12_mskcc_2020:P-0013936
prad_cdk12_mskcc_2020:P-0014004
prad_cdk12_mskcc_2020:P-0014523
prad_cdk12_mskcc_2020:P-0014629
prad_cdk12_mskcc_2020:P-0014686
prad_cdk12_mskcc_2020:P-0014841
prad_cdk12_mskcc_2020:P-0015744
prad_cdk12_mskcc_2020:P-0015837
prad_cdk12_mskcc_2020:P-0015925
prad_cdk12_mskcc_2020:P-0016134
prad_cdk12_mskcc_2020:P-0016325
prad_cdk12_mskcc_2020:P-0016386
prad_cdk12_mskcc_2020:P-0016733
prad_cdk12_mskcc_2020:P-0016812
prad_cdk12_mskcc_2020:P-0016961
prad_cdk12_mskcc_2020:P-0017262
prad_cdk12_mskcc_2020:P-0017491
prad_cdk12_mskcc_2020:P-0017605
prad_cdk12_mskcc_2020:P-0017730
prad_cdk12_mskcc_2020:P-0017754
prad_cdk12_mskcc_2020:P-0017844
prad_cdk12_mskcc_2020:P-0018235
prad_cdk12_mskcc_2020:P-0018713
prad_cdk12_mskcc_2020:P-0018791
prad_cdk12_mskcc_2020:P-0019030
prad_cdk12_mskcc_2020:P-0019420
prad_cdk12_mskcc_2020:P-0019830
prad_cdk12_mskcc_2020:P-0019930
prad_cdk12_mskcc_2020:P-0020111
prad_cdk12_mskcc_2020:P-0020482
prad_cdk12_mskcc_2020:P-0020812
prad_cdk12_mskcc_2020:P-0021626
prad_cdk12_mskcc_2020:P-0021723
prad_cdk12_mskcc_2020:P-0021792
prad_cdk12_mskcc_2020:P-0022197
prad_cdk12_mskcc_2020:P-0022249
prad_cdk12_mskcc_2020:P-0022430
prad_cdk12_mskcc_2020:P-0022439
prad_cdk12_mskcc_2020:P-0022470
prad_cdk12_mskcc_2020:P-0022700
prad_cdk12_mskcc_2020:P-0022782
prad_cdk12_mskcc_2020:P-0023030
prad_cdk12_mskcc_2020:P-0023276
prad_cdk12_mskcc_2020:P-0023318
prad_cdk12_mskcc_2020:P-0024220
prad_cdk12_mskcc_2020:P-0024598
prad_cdk12_mskcc_2020:P-0024648
prad_cdk12_mskcc_2020:P-0025044
prad_cdk12_mskcc_2020:P-0025138
prad_cdk12_mskcc_2020:P-0025150
prad_cdk12_mskcc_2020:P-0025494
prad_cdk12_mskcc_2020:P-0025562
prad_cdk12_mskcc_2020:P-0026152
prad_cdk12_mskcc_2020:P-0026162
prad_cdk12_mskcc_2020:P-0026202
prad_cdk12_mskcc_2020:P-0026369
prad_cdk12_mskcc_2020:P-0026808
prad_cdk12_mskcc_2020:P-0027293
prad_cdk12_mskcc_2020:P-0027526
prad_cdk12_mskcc_2020:P-0027823
prad_cdk12_mskcc_2020:P-0028090
prad_cdk12_mskcc_2020:P-0029339
prad_cdk12_mskcc_2020:P-0030801
prad_cdk12_mskcc_2020:P-0031062
prad_cdk12_mskcc_2020:P-0031991
prad_cdk12_mskcc_2020:P-0032651
prad_cdk12_mskcc_2020:P-0032799
prad_cdk12_mskcc_2020:P-0033105
prad_cdk12_mskcc_2020:P-0038369
prad_cdk12_mskcc_2020:P-0017097
prad_cdk12_mskcc_2020:P-0021310
prad_cdk12_mskcc_2020:P-0000431
prad_cdk12_mskcc_2020:P-0000442
prad_cdk12_mskcc_2020:P-0001337
prad_cdk12_mskcc_2020:P-0003052
prad_cdk12_mskcc_2020:P-0003602
prad_cdk12_mskcc_2020:P-0004311
prad_cdk12_mskcc_2020:P-0006837
prad_cdk12_mskcc_2020:P-0006905
prad_cdk12_mskcc_2020:P-0007025
prad_cdk12_mskcc_2020:P-0009990
prad_cdk12_mskcc_2020:P-0010075
prad_cdk12_mskcc_2020:P-0010518
prad_cdk12_mskcc_2020:P-0010731
prad_cdk12_mskcc_2020:P-0012513
prad_cdk12_mskcc_2020:P-0013245
prad_cdk12_mskcc_2020:P-0013631
prad_cdk12_mskcc_2020:P-0013858
prad_cdk12_mskcc_2020:P-0014395
prad_cdk12_mskcc_2020:P-0015132
prad_cdk12_mskcc_2020:P-0015836
prad_cdk12_mskcc_2020:P-0016004
prad_cdk12_mskcc_2020:P-0016214
prad_cdk12_mskcc_2020:P-0016768
prad_cdk12_mskcc_2020:P-0016895
prad_cdk12_mskcc_2020:P-0016914
prad_cdk12_mskcc_2020:P-0017892
prad_cdk12_mskcc_2020:P-0018178
prad_cdk12_mskcc_2020:P-0018395
prad_cdk12_mskcc_2020:P-0020023
prad_cdk12_mskcc_2020:P-0022559
prad_cdk12_mskcc_2020:P-0023625
prad_cdk12_mskcc_2020:P-0024996
prad_cdk12_mskcc_2020:P-0027272
prad_cdk12_mskcc_2020:P-0027874
prad_cdk12_mskcc_2020:P-0028306
prad_cdk12_mskcc_2020:P-0029405
prad_cdk12_mskcc_2020:P-0030109
prad_cdk12_mskcc_2020:P-0030730
prad_cdk12_mskcc_2020:P-0032601
prad_cdk12_mskcc_2020:P-0019520
prad_cdk12_mskcc_2020:P-0009393
prad_cdk12_mskcc_2020:P-0016538
prad_cdk12_mskcc_2020:P-0022557
prad_cdk12_mskcc_2020:P-0000373
prad_cdk12_mskcc_2020:P-0010015
prad_cdk12_mskcc_2020:P-0011377
prad_pik3r1_msk_2021:P-0046881
prad_pik3r1_msk_2021:P-0014598
prad_pik3r1_msk_2021:P-0009044
prad_pik3r1_msk_2021:P-0012104
prad_pik3r1_msk_2021:P-0013000
prad_pik3r1_msk_2021:P-0013502
prad_pik3r1_msk_2021:P-0015211
prad_pik3r1_msk_2021:P-0019580
prad_pik3r1_msk_2021:P-0020784
prad_pik3r1_msk_2021:P-0034277
prad_pik3r1_msk_2021:P-0047234
prad_pik3r1_msk_2021:P-0052243
prad_pik3r1_msk_2021:P-0054445
prad_pik3r1_msk_2021:P-0018870
prad_pik3r1_msk_2021:P-0022611
prad_pik3r1_msk_2021:P-0040262
prad_pik3r1_msk_2021:P-0023866
prad_pik3r1_msk_2021:P-0030976
prad_pik3r1_msk_2021:P-0019624
prad_pik3r1_msk_2021:P-0041584
prad_pik3r1_msk_2021:P-0058344
prad_pik3r1_msk_2021:P-0010309
prad_pik3r1_msk_2021:P-0010746
prad_pik3r1_msk_2021:P-0009982
prad_pik3r1_msk_2021:P-0034472
prad_pik3r1_msk_2021:P-0000725
prad_pik3r1_msk_2021:P-0001128
prad_pik3r1_msk_2021:P-0006602
prad_pik3r1_msk_2021:P-0009151
prad_pik3r1_msk_2021:P-0009399
prad_pik3r1_msk_2021:P-0009565
prad_pik3r1_msk_2021:P-0009817
prad_pik3r1_msk_2021:P-0012643
prad_pik3r1_msk_2021:P-0012995
prad_pik3r1_msk_2021:P-0017708
prad_pik3r1_msk_2021:P-0017987
prad_pik3r1_msk_2021:P-0025759
prad_pik3r1_msk_2021:P-0027921
prad_pik3r1_msk_2021:P-0028741
prad_pik3r1_msk_2021:P-0028835
prad_pik3r1_msk_2021:P-0030410
prad_pik3r1_msk_2021:P-0030736
prad_pik3r1_msk_2021:P-0036594
prad_pik3r1_msk_2021:P-0038585
prad_pik3r1_msk_2021:P-0042135
prad_pik3r1_msk_2021:P-0042144
prad_pik3r1_msk_2021:P-0043830
prad_pik3r1_msk_2021:P-0045291
prad_pik3r1_msk_2021:P-0046569
prad_pik3r1_msk_2021:P-0049900
prad_pik3r1_msk_2021:P-0053403
prad_pik3r1_msk_2021:P-0054652
prad_pik3r1_msk_2021:P-0054666
prad_pik3r1_msk_2021:P-0047148
prad_pik3r1_msk_2021:P-0052272
prad_pik3r1_msk_2021:P-0019582
prad_pik3r1_msk_2021:P-0052159
prad_pik3r1_msk_2021:P-0019324
prad_pik3r1_msk_2021:P-0019462
prad_pik3r1_msk_2021:P-0036932
prad_pik3r1_msk_2021:P-0038012
prad_pik3r1_msk_2021:P-0040175
prad_pik3r1_msk_2021:P-0023741
prad_pik3r1_msk_2021:P-0005454
prad_pik3r1_msk_2021:P-0020792
prad_pik3r1_msk_2021:P-0033701
prad_pik3r1_msk_2021:P-0020984
prad_pik3r1_msk_2021:P-0049886
prad_pik3r1_msk_2021:P-0049144
prad_pik3r1_msk_2021:P-0036294
prad_pik3r1_msk_2021:P-0042663
prad_pik3r1_msk_2021:P-0043325
prad_pik3r1_msk_2021:P-0054535
prad_pik3r1_msk_2021:P-0030831
prad_pik3r1_msk_2021:P-0015184
prad_pik3r1_msk_2021:P-0042990
prad_pik3r1_msk_2021:P-0023666
prad_pik3r1_msk_2021:P-0027722
prad_pik3r1_msk_2021:P-0007533
prad_pik3r1_msk_2021:P-0009402
prad_pik3r1_msk_2021:P-0014408
prad_pik3r1_msk_2021:P-0015991
prad_pik3r1_msk_2021:P-0031856
prad_pik3r1_msk_2021:P-0047316
prad_pik3r1_msk_2021:P-0001884
prad_pik3r1_msk_2021:P-0031189
prad_pik3r1_msk_2021:P-0003395
prad_pik3r1_msk_2021:P-0039805
prad_pik3r1_msk_2021:P-0018627
prad_pik3r1_msk_2021:P-0034431
prad_pik3r1_msk_2021:P-0035270
prad_pik3r1_msk_2021:P-0036176
prad_pik3r1_msk_2021:P-0000935
prad_pik3r1_msk_2021:P-0003040
prad_pik3r1_msk_2021:P-0004312
prad_pik3r1_msk_2021:P-0005787
prad_pik3r1_msk_2021:P-0007043
prad_pik3r1_msk_2021:P-0009374
prad_pik3r1_msk_2021:P-0011090
prad_pik3r1_msk_2021:P-0013358
prad_pik3r1_msk_2021:P-0013465
prad_pik3r1_msk_2021:P-0016396
prad_pik3r1_msk_2021:P-0017232
prad_pik3r1_msk_2021:P-0021023
prad_pik3r1_msk_2021:P-0021104
prad_pik3r1_msk_2021:P-0023958
prad_pik3r1_msk_2021:P-0025139
prad_pik3r1_msk_2021:P-0025571
prad_pik3r1_msk_2021:P-0032194
prad_pik3r1_msk_2021:P-0037029
prad_pik3r1_msk_2021:P-0041034
prad_pik3r1_msk_2021:P-0041549
prad_pik3r1_msk_2021:P-0042252
prad_pik3r1_msk_2021:P-0043708
prad_pik3r1_msk_2021:P-0057103
prad_pik3r1_msk_2021:P-0006584
prad_pik3r1_msk_2021:P-0019863
prad_pik3r1_msk_2021:P-0029728
prad_pik3r1_msk_2021:P-0034378
prad_pik3r1_msk_2021:P-0024095
prad_pik3r1_msk_2021:P-0024554
prad_pik3r1_msk_2021:P-0054232
prad_pik3r1_msk_2021:P-0025676
prad_pik3r1_msk_2021:P-0004482
prad_pik3r1_msk_2021:P-0021928
prad_pik3r1_msk_2021:P-0004704
prad_pik3r1_msk_2021:P-0008461
prad_pik3r1_msk_2021:P-0014701
prad_pik3r1_msk_2021:P-0008098
prad_pik3r1_msk_2021:P-0015345
prad_pik3r1_msk_2021:P-0000441
prad_pik3r1_msk_2021:P-0004448
prad_pik3r1_msk_2021:P-0004489
prad_pik3r1_msk_2021:P-0005344
prad_pik3r1_msk_2021:P-0008315
prad_pik3r1_msk_2021:P-0011290
prad_pik3r1_msk_2021:P-0011368
prad_pik3r1_msk_2021:P-0014566
prad_pik3r1_msk_2021:P-0016883
prad_pik3r1_msk_2021:P-0023170
prad_pik3r1_msk_2021:P-0030625
prad_pik3r1_msk_2021:P-0032212
prad_pik3r1_msk_2021:P-0041059
prad_pik3r1_msk_2021:P-0044808
prad_pik3r1_msk_2021:P-0050888
prad_pik3r1_msk_2021:P-0056098
prad_pik3r1_msk_2021:P-0018117
prad_pik3r1_msk_2021:P-0001297
prad_pik3r1_msk_2021:P-0008655
prad_pik3r1_msk_2021:P-0018489
prad_pik3r1_msk_2021:P-0042174
prad_pik3r1_msk_2021:P-0021342
prad_pik3r1_msk_2021:P-0045146
prad_pik3r1_msk_2021:P-0002901
prad_pik3r1_msk_2021:P-0054506
prad_pik3r1_msk_2021:P-0029843
prad_pik3r1_msk_2021:P-0025097
prad_pik3r1_msk_2021:P-0022114
prad_pik3r1_msk_2021:P-0036507
prad_pik3r1_msk_2021:P-0039771
prad_pik3r1_msk_2021:P-0042680
prad_pik3r1_msk_2021:P-0054578
prad_pik3r1_msk_2021:P-0047878
prad_pik3r1_msk_2021:P-0056842
prad_pik3r1_msk_2021:P-0049601
prad_pik3r1_msk_2021:P-0003971
prad_pik3r1_msk_2021:P-0009728
prad_pik3r1_msk_2021:P-0014400
prad_pik3r1_msk_2021:P-0030465
prad_pik3r1_msk_2021:P-0040136
prad_pik3r1_msk_2021:P-0040742
prad_pik3r1_msk_2021:P-0048761
prad_pik3r1_msk_2021:P-0054692
prad_pik3r1_msk_2021:P-0009640
prad_pik3r1_msk_2021:P-0029796
prad_pik3r1_msk_2021:P-0021823
prad_pik3r1_msk_2021:P-0061187
prad_pik3r1_msk_2021:P-0009654
prad_pik3r1_msk_2021:P-0016405
prad_pik3r1_msk_2021:P-0012109
prad_pik3r1_msk_2021:P-0053704
prad_pik3r1_msk_2021:P-0000659
prad_pik3r1_msk_2021:P-0018217
prad_pik3r1_msk_2021:P-0044058
prad_pik3r1_msk_2021:P-0031712
prad_pik3r1_msk_2021:P-0031426
prad_pik3r1_msk_2021:P-0000318
prad_pik3r1_msk_2021:P-0000610
prad_pik3r1_msk_2021:P-0001108
prad_pik3r1_msk_2021:P-0001141
prad_pik3r1_msk_2021:P-0001274
prad_pik3r1_msk_2021:P-0001698
prad_pik3r1_msk_2021:P-0002149
prad_pik3r1_msk_2021:P-0002364
prad_pik3r1_msk_2021:P-0002974
prad_pik3r1_msk_2021:P-0002999
prad_pik3r1_msk_2021:P-0003033
prad_pik3r1_msk_2021:P-0003226
prad_pik3r1_msk_2021:P-0003419
prad_pik3r1_msk_2021:P-0004826
prad_pik3r1_msk_2021:P-0005596
prad_pik3r1_msk_2021:P-0006635
prad_pik3r1_msk_2021:P-0006670
prad_pik3r1_msk_2021:P-0006767
prad_pik3r1_msk_2021:P-0006994
prad_pik3r1_msk_2021:P-0007749
prad_pik3r1_msk_2021:P-0008074
prad_pik3r1_msk_2021:P-0008206
prad_pik3r1_msk_2021:P-0008852
prad_pik3r1_msk_2021:P-0008966
prad_pik3r1_msk_2021:P-0009543
prad_pik3r1_msk_2021:P-0010657
prad_pik3r1_msk_2021:P-0011483
prad_pik3r1_msk_2021:P-0012030
prad_pik3r1_msk_2021:P-0012048
prad_pik3r1_msk_2021:P-0012914
prad_pik3r1_msk_2021:P-0013457
prad_pik3r1_msk_2021:P-0013674
prad_pik3r1_msk_2021:P-0013936
prad_pik3r1_msk_2021:P-0014004
prad_pik3r1_msk_2021:P-0014254
prad_pik3r1_msk_2021:P-0014523
prad_pik3r1_msk_2021:P-0014629
prad_pik3r1_msk_2021:P-0014841
prad_pik3r1_msk_2021:P-0015744
prad_pik3r1_msk_2021:P-0015837
prad_pik3r1_msk_2021:P-0016134
prad_pik3r1_msk_2021:P-0016812
prad_pik3r1_msk_2021:P-0016961
prad_pik3r1_msk_2021:P-0017262
prad_pik3r1_msk_2021:P-0017491
prad_pik3r1_msk_2021:P-0017605
prad_pik3r1_msk_2021:P-0017730
prad_pik3r1_msk_2021:P-0017844
prad_pik3r1_msk_2021:P-0018713
prad_pik3r1_msk_2021:P-0018791
prad_pik3r1_msk_2021:P-0019030
prad_pik3r1_msk_2021:P-0019830
prad_pik3r1_msk_2021:P-0019930
prad_pik3r1_msk_2021:P-0020111
prad_pik3r1_msk_2021:P-0020482
prad_pik3r1_msk_2021:P-0020812
prad_pik3r1_msk_2021:P-0021626
prad_pik3r1_msk_2021:P-0021673
prad_pik3r1_msk_2021:P-0021792
prad_pik3r1_msk_2021:P-0022197
prad_pik3r1_msk_2021:P-0022430
prad_pik3r1_msk_2021:P-0022439
prad_pik3r1_msk_2021:P-0022700
prad_pik3r1_msk_2021:P-0022782
prad_pik3r1_msk_2021:P-0023030
prad_pik3r1_msk_2021:P-0023318
prad_pik3r1_msk_2021:P-0024220
prad_pik3r1_msk_2021:P-0024459
prad_pik3r1_msk_2021:P-0024598
prad_pik3r1_msk_2021:P-0025044
prad_pik3r1_msk_2021:P-0025150
prad_pik3r1_msk_2021:P-0025494
prad_pik3r1_msk_2021:P-0026152
prad_pik3r1_msk_2021:P-0026162
prad_pik3r1_msk_2021:P-0026202
prad_pik3r1_msk_2021:P-0026369
prad_pik3r1_msk_2021:P-0026808
prad_pik3r1_msk_2021:P-0027526
prad_pik3r1_msk_2021:P-0027823
prad_pik3r1_msk_2021:P-0028090
prad_pik3r1_msk_2021:P-0028569
prad_pik3r1_msk_2021:P-0029939
prad_pik3r1_msk_2021:P-0029948
prad_pik3r1_msk_2021:P-0031062
prad_pik3r1_msk_2021:P-0031991
prad_pik3r1_msk_2021:P-0032027
prad_pik3r1_msk_2021:P-0033105
prad_pik3r1_msk_2021:P-0033226
prad_pik3r1_msk_2021:P-0033660
prad_pik3r1_msk_2021:P-0034327
prad_pik3r1_msk_2021:P-0035284
prad_pik3r1_msk_2021:P-0036007
prad_pik3r1_msk_2021:P-0036349
prad_pik3r1_msk_2021:P-0036351
prad_pik3r1_msk_2021:P-0037664
prad_pik3r1_msk_2021:P-0037691
prad_pik3r1_msk_2021:P-0037701
prad_pik3r1_msk_2021:P-0038369
prad_pik3r1_msk_2021:P-0039006
prad_pik3r1_msk_2021:P-0041103
prad_pik3r1_msk_2021:P-0041944
prad_pik3r1_msk_2021:P-0041945
prad_pik3r1_msk_2021:P-0042583
prad_pik3r1_msk_2021:P-0043029
prad_pik3r1_msk_2021:P-0043489
prad_pik3r1_msk_2021:P-0044288
prad_pik3r1_msk_2021:P-0045289
prad_pik3r1_msk_2021:P-0045358
prad_pik3r1_msk_2021:P-0048510
prad_pik3r1_msk_2021:P-0050123
prad_pik3r1_msk_2021:P-0050426
prad_pik3r1_msk_2021:P-0050644
prad_pik3r1_msk_2021:P-0051311
prad_pik3r1_msk_2021:P-0052970
prad_pik3r1_msk_2021:P-0053240
prad_pik3r1_msk_2021:P-0053926
prad_pik3r1_msk_2021:P-0054306
prad_pik3r1_msk_2021:P-0054521
prad_pik3r1_msk_2021:P-0017097
prad_pik3r1_msk_2021:P-0039648
prad_pik3r1_msk_2021:P-0021310
prad_pik3r1_msk_2021:P-0000431
prad_pik3r1_msk_2021:P-0000442
prad_pik3r1_msk_2021:P-0003052
prad_pik3r1_msk_2021:P-0003602
prad_pik3r1_msk_2021:P-0004311
prad_pik3r1_msk_2021:P-0006905
prad_pik3r1_msk_2021:P-0007025
prad_pik3r1_msk_2021:P-0007629
prad_pik3r1_msk_2021:P-0010075
prad_pik3r1_msk_2021:P-0010518
prad_pik3r1_msk_2021:P-0012513
prad_pik3r1_msk_2021:P-0013245
prad_pik3r1_msk_2021:P-0013631
prad_pik3r1_msk_2021:P-0013858
prad_pik3r1_msk_2021:P-0014395
prad_pik3r1_msk_2021:P-0015132
prad_pik3r1_msk_2021:P-0015836
prad_pik3r1_msk_2021:P-0016004
prad_pik3r1_msk_2021:P-0016214
prad_pik3r1_msk_2021:P-0016895
prad_pik3r1_msk_2021:P-0016914
prad_pik3r1_msk_2021:P-0017892
prad_pik3r1_msk_2021:P-0018178
prad_pik3r1_msk_2021:P-0018395
prad_pik3r1_msk_2021:P-0024996
prad_pik3r1_msk_2021:P-0027874
prad_pik3r1_msk_2021:P-0028306
prad_pik3r1_msk_2021:P-0029405
prad_pik3r1_msk_2021:P-0030109
prad_pik3r1_msk_2021:P-0030842
prad_pik3r1_msk_2021:P-0032601
prad_pik3r1_msk_2021:P-0033488
prad_pik3r1_msk_2021:P-0035445
prad_pik3r1_msk_2021:P-0036352
prad_pik3r1_msk_2021:P-0036757
prad_pik3r1_msk_2021:P-0037022
prad_pik3r1_msk_2021:P-0037140
prad_pik3r1_msk_2021:P-0038299
prad_pik3r1_msk_2021:P-0039402
prad_pik3r1_msk_2021:P-0041957
prad_pik3r1_msk_2021:P-0042476
prad_pik3r1_msk_2021:P-0043235
prad_pik3r1_msk_2021:P-0043655
prad_pik3r1_msk_2021:P-0045642
prad_pik3r1_msk_2021:P-0047751
prad_pik3r1_msk_2021:P-0048955
prad_pik3r1_msk_2021:P-0049068
prad_pik3r1_msk_2021:P-0051162
prad_pik3r1_msk_2021:P-0051756
prad_pik3r1_msk_2021:P-0055138
prad_pik3r1_msk_2021:P-0019520
prad_pik3r1_msk_2021:P-0040088
prad_pik3r1_msk_2021:P-0052131
prad_su2c_2019:9115522
prad_su2c_2019:6115320
prad_su2c_2019:1115444
prad_su2c_2019:97115333
prad_su2c_2019:9115571
prad_su2c_2019:5115197
prad_su2c_2019:96115624
prad_su2c_2019:96115639
prad_su2c_2019:1115578
prad_su2c_2019:96115494
prad_su2c_2019:1115089
prad_su2c_2019:5115024
prad_su2c_2019:6115115
prad_su2c_2019:96115626
prad_su2c_2019:5115408
prad_su2c_2019:9115540
prad_su2c_2019:5115291
prad_su2c_2019:96115215
prad_su2c_2019:6115322
prad_su2c_2019:9115050
prad_su2c_2019:5115194
prad_su2c_2019:97115376
prad_su2c_2019:1115527
prad_su2c_2019:96115208
prad_su2c_2019:96115509
prad_su2c_2019:6115401
prad_su2c_2019:1115087
prad_su2c_2019:1115308
prad_su2c_2019:1115312
prad_su2c_2019:6115603
prad_su2c_2019:6115590
prad_su2c_2019:1115090
prad_su2c_2019:9115045
prad_su2c_2019:1115554
prad_su2c_2019:6115286
prad_su2c_2019:6115012
prad_su2c_2019:9115570
prad_su2c_2019:1115245
prad_su2c_2019:6115387
prad_su2c_2019:9115338
prad_su2c_2019:5115160
prad_su2c_2019:5115058
prad_su2c_2019:6115394
prad_su2c_2019:96115138
prad_su2c_2019:5115256
prad_su2c_2019:9115174
prad_su2c_2019:5115127
prad_su2c_2019:97115166
prad_su2c_2019:1115503
prad_su2c_2019:96115508
prad_su2c_2019:9115180
prad_su2c_2019:5115276
prad_su2c_2019:5115152
prad_su2c_2019:97115125
prad_su2c_2019:1115306
prad_su2c_2019:5115077
prad_su2c_2019:96115209
prad_su2c_2019:9115055
prad_su2c_2019:97115280
prad_su2c_2019:9115173
prad_su2c_2019:5115614
prad_su2c_2019:96115474
prad_su2c_2019:97115188
prad_su2c_2019:9115185
prad_su2c_2019:5115505
prad_su2c_2019:9115415
prad_su2c_2019:5115196
prad_su2c_2019:5115198
prad_su2c_2019:5115611
prad_su2c_2019:9115051
prad_su2c_2019:9115107
prad_su2c_2019:97115001
prad_su2c_2019:97115147
prad_su2c_2019:97115316
prad_su2c_2019:97115447
prad_su2c_2019:97115148
prad_su2c_2019:97115453
prad_su2c_2019:96115141
prad_su2c_2019:5115193
prad_su2c_2019:5115610
prad_su2c_2019:9115048
prad_su2c_2019:1115157
prad_su2c_2019:6115391
prad_su2c_2019:6115397
prad_su2c_2019:6115596
prad_su2c_2019:6115597
prad_su2c_2019:96115622
prad_su2c_2019:97115330
prad_su2c_2019:9115068
prad_su2c_2019:9115042
prad_su2c_2019:1115549
prad_su2c_2019:6115321
prad_su2c_2019:6115594
prad_su2c_2019:9115516
prad_su2c_2019:9115552
prad_su2c_2019:96115472
prad_su2c_2019:96115616
prad_su2c_2019:97115454
prad_su2c_2019:97115315
prad_su2c_2019:1115525
prad_su2c_2019:97115368
prad_su2c_2019:5115032
prad_su2c_2019:5115158
prad_su2c_2019:9115064
prad_su2c_2019:13115464
prad_su2c_2019:97115365
prad_su2c_2019:1115091
prad_su2c_2019:1115156
prad_su2c_2019:1115183
prad_su2c_2019:1115305
prad_su2c_2019:1115309
prad_su2c_2019:6115123
prad_su2c_2019:6115233
prad_su2c_2019:6115234
prad_su2c_2019:6115317
prad_su2c_2019:6115323
prad_su2c_2019:6115600
prad_su2c_2019:6115604
prad_su2c_2019:9115341
prad_su2c_2019:9115551
prad_su2c_2019:96115145
prad_su2c_2019:96115482
prad_su2c_2019:96115629
prad_su2c_2019:96115643
prad_su2c_2019:5115258
prad_su2c_2019:1115200
prad_su2c_2019:97115448
prad_su2c_2019:1115314
prad_mcspc_mskcc_2020:P-0022557
prad_mcspc_mskcc_2020:P-0011377
prad_mcspc_mskcc_2020:P-0001774
prad_mcspc_mskcc_2020:P-0014598
prad_mcspc_mskcc_2020:P-0012230
prad_mcspc_mskcc_2020:P-0007930
prad_mcspc_mskcc_2020:P-0009044
prad_mcspc_mskcc_2020:P-0013000
prad_mcspc_mskcc_2020:P-0015211
prad_mcspc_mskcc_2020:P-0020784
prad_mcspc_mskcc_2020:P-0029645
prad_mcspc_mskcc_2020:P-0023866
prad_mcspc_mskcc_2020:P-0019624
prad_mcspc_mskcc_2020:P-0012181
prad_mcspc_mskcc_2020:P-0008920
prad_mcspc_mskcc_2020:P-0001128
prad_mcspc_mskcc_2020:P-0001244
prad_mcspc_mskcc_2020:P-0006602
prad_mcspc_mskcc_2020:P-0009151
prad_mcspc_mskcc_2020:P-0009399
prad_mcspc_mskcc_2020:P-0009565
prad_mcspc_mskcc_2020:P-0009817
prad_mcspc_mskcc_2020:P-0012643
prad_mcspc_mskcc_2020:P-0021711
prad_mcspc_mskcc_2020:P-0025759
prad_mcspc_mskcc_2020:P-0028741
prad_mcspc_mskcc_2020:P-0025952
prad_mcspc_mskcc_2020:P-0021525
prad_mcspc_mskcc_2020:P-0005454
prad_mcspc_mskcc_2020:P-0020792
prad_mcspc_mskcc_2020:P-0010178
prad_mcspc_mskcc_2020:P-0014438
prad_mcspc_mskcc_2020:P-0020078
prad_mcspc_mskcc_2020:P-0003395
prad_mcspc_mskcc_2020:P-0007043
prad_mcspc_mskcc_2020:P-0000683
prad_mcspc_mskcc_2020:P-0016396
prad_mcspc_mskcc_2020:P-0025676
prad_mcspc_mskcc_2020:P-0008098
prad_mcspc_mskcc_2020:P-0018489
prad_mcspc_mskcc_2020:P-0025097
prad_mcspc_mskcc_2020:P-0029087
prad_mcspc_mskcc_2020:P-0012914
prad_mcspc_mskcc_2020:P-0014254
prad_mcspc_mskcc_2020:P-0033226
prad_mcspc_mskcc_2020:P-0030465
prad_mcspc_mskcc_2020:P-0009640
prad_mcspc_mskcc_2020:P-0021823
prad_mcspc_mskcc_2020:P-0016405
prad_mcspc_mskcc_2020:P-0000659
prad_mcspc_mskcc_2020:P-0020812
prad_mcspc_mskcc_2020:P-0031426
prad_mcspc_mskcc_2020:P-0000888
prad_mcspc_mskcc_2020:P-0001141
prad_mcspc_mskcc_2020:P-0002123
prad_mcspc_mskcc_2020:P-0002974
prad_mcspc_mskcc_2020:P-0003033
prad_mcspc_mskcc_2020:P-0005045
prad_mcspc_mskcc_2020:P-0005436
prad_mcspc_mskcc_2020:P-0007547
prad_mcspc_mskcc_2020:P-0007749
prad_mcspc_mskcc_2020:P-0009687
prad_mcspc_mskcc_2020:P-0011483
prad_mcspc_mskcc_2020:P-0012030
prad_mcspc_mskcc_2020:P-0012048
prad_mcspc_mskcc_2020:P-0013674
prad_mcspc_mskcc_2020:P-0013729
prad_mcspc_mskcc_2020:P-0014004
prad_mcspc_mskcc_2020:P-0014629
prad_mcspc_mskcc_2020:P-0014686
prad_mcspc_mskcc_2020:P-0016733
prad_mcspc_mskcc_2020:P-0019030
prad_mcspc_mskcc_2020:P-0022439
prad_mcspc_mskcc_2020:P-0022700
prad_mcspc_mskcc_2020:P-0023249
prad_mcspc_mskcc_2020:P-0023276
prad_mcspc_mskcc_2020:P-0025044
prad_mcspc_mskcc_2020:P-0025138
prad_mcspc_mskcc_2020:P-0025150
prad_mcspc_mskcc_2020:P-0025494
prad_mcspc_mskcc_2020:P-0026808
prad_mcspc_mskcc_2020:P-0027823
prad_mcspc_mskcc_2020:P-0030801
prad_mcspc_mskcc_2020:P-0031062
prad_mcspc_mskcc_2020:P-0032799
prad_mcspc_mskcc_2020:P-0033105
prad_mcspc_mskcc_2020:P-0017097
prad_mcspc_mskcc_2020:P-0000431
prad_mcspc_mskcc_2020:P-0000442
prad_mcspc_mskcc_2020:P-0007025
prad_mcspc_mskcc_2020:P-0007629
prad_mcspc_mskcc_2020:P-0010034
prad_mcspc_mskcc_2020:P-0012513
prad_mcspc_mskcc_2020:P-0013858
prad_mcspc_mskcc_2020:P-0014395
prad_mcspc_mskcc_2020:P-0016214
prad_mcspc_mskcc_2020:P-0016768
prad_mcspc_mskcc_2020:P-0016895
prad_mcspc_mskcc_2020:P-0017892
prad_mcspc_mskcc_2020:P-0018178
prad_mcspc_mskcc_2020:P-0018395
prad_mcspc_mskcc_2020:P-0020023
prad_mcspc_mskcc_2020:P-0027874
prad_mcspc_mskcc_2020:P-0028306
prad_mcspc_mskcc_2020:P-0029405
prad_mcspc_mskcc_2020:P-0030109
prad_mcspc_mskcc_2020:P-0032601
prad_mskcc:PCA0134
prad_mskcc:PCA0135
prad_mskcc:PCA0141
prad_mskcc:PCA0084
prad_mskcc:PCA0144
prad_mskcc:PCA0018
prad_mskcc:PCA0146
prad_mskcc:PCA0168
prad_mskcc:PCA0173
prad_mskcc:PCA0211
prad_mskcc:PCA0193
prad_mskcc:PCA0104
prad_mskcc:PCA0208
prad_mskcc:PCA0213
prad_mskcc:PCA0171
prad_mskcc:PCA0092
prad_mskcc:PCA0024
prad_mskcc:PCA0199
prad_mskcc:PCA0205
prad_mskcc:PCA0190
prad_mskcc:PCA0206
prad_mskcc:PCA0180
prad_mskcc:PCA0189
prad_mskcc:PCA0114
prad_mskcc:PCA0186
prad_mskcc:PCA0195
prad_mskcc:PCA0214
prad_mskcc:PCA0218
prad_mskcc:PCA0188
prad_mskcc:PCA0032
prad_mskcc:PCA0187
prad_mskcc:PCA0038
prad_mskcc:PCA0107
prad_mskcc:PCA0128
prad_mskcc:PCA0083
prad_mskcc:PCA0049
prad_mskcc:PCA0073
prad_mskcc:PCA0079
prad_mskcc:PCA0139
prad_mskcc:PCA0183
prad_mskcc:PCA0185
prad_mskcc:PCA0191
prostate_dkfz_2018:ICGC_PCAL09
prostate_dkfz_2018:ICGC_PCA137
prostate_dkfz_2018:ICGC_PCA091
prostate_dkfz_2018:CPCG0364
prostate_dkfz_2018:ICGC_PCAL10
prostate_dkfz_2018:ICGC_PCAL34
prostate_dkfz_2018:ICGC_PCA038
prostate_dkfz_2018:ICGC_PCA027
prostate_dkfz_2018:ICGC_PCA069
prostate_dkfz_2018:ICGC_PCA125
prostate_dkfz_2018:ICGC_PCA180
prostate_dkfz_2018:ICGC_PCA084
prostate_dkfz_2018:ICGC_PCA001
prostate_dkfz_2018:ICGC_PCA192
prostate_dkfz_2018:ICGC_PCAL46
prostate_dkfz_2018:ICGC_PCA142
prostate_dkfz_2018:CPCG0094
prostate_dkfz_2018:ICGC_PCAL16
nepc_wcm_2016:WCMC10680
nepc_wcm_2016:WCMC89
nepc_wcm_2016:WCMC119
nepc_wcm_2016:WCMC21010
nepc_wcm_2016:WCMC7
nepc_wcm_2016:WCMC21014
nepc_wcm_2016:WCMC161
nepc_wcm_2016:WCMC199
nepc_wcm_2016:WCMC90
nepc_wcm_2016:WCMC158
nepc_wcm_2016:WCMC162
nepc_wcm_2016:WCMC183
nepc_wcm_2016:WCMC185
nepc_wcm_2016:WCMC11040
nepc_wcm_2016:WCMC10
prostate_dkfz_2018:ICGC_PCA176
prostate_dkfz_2018:ICGC_PCA084
prostate_dkfz_2018:ICGC_PCA033
prostate_dkfz_2018:ICGC_PCA030
prostate_dkfz_2018:ICGC_PCA091
prostate_dkfz_2018:ICGC_PCAL14
prostate_dkfz_2018:CPCG0072
prostate_dkfz_2018:ICGC_PCA192
prostate_dkfz_2018:ICGC_PCA001
prostate_dkfz_2018:ICGC_PCAL43
prostate_dkfz_2018:CPCG0075
prostate_dkfz_2018:CPCG0364
prostate_dkfz_2018:ICGC_PCAL27
prostate_dkfz_2018:ICGC_PCA165
prostate_dkfz_2018:ICGC_PCA105
prostate_dkfz_2018:ICGC_PCA059
nepc_wcm_2016:WCMC89
nepc_wcm_2016:WCMC119
nepc_wcm_2016:WCMC21010
nepc_wcm_2016:WCMC7520
nepc_wcm_2016:WCMC9
nepc_wcm_2016:WCMC90
nepc_wcm_2016:WCMC183
nepc_wcm_2016:WCMC185
nepc_wcm_2016:WCMC11040
nepc_wcm_2016:WCMC79
nepc_wcm_2016:WCMC124
nepc_wcm_2016:WCMC195
nepc_wcm_2016:WCMC21014
nepc_wcm_2016:WCMC26731
nepc_wcm_2016:WCMC15
nepc_wcm_2016:WCMC198
nepc_wcm_2016:WCMC10363
nepc_wcm_2016:WCMC12688

## Sheet: 22Rv1
1 alteration the same	2-4 alterations the same	5-6 alterations the same
prad_tcga:TCGA-G9-7525	prad_tcga:TCGA-CH-5752	prad_tcga:TCGA-XK-AAIW
prad_tcga:TCGA-XK-AAJ3	prad_tcga:TCGA-EJ-5514	prad_mskcc_2017:P-0004910
prad_tcga:TCGA-CH-5768	prad_tcga:TCGA-HC-7081	prad_su2c_2019:5115650
prad_tcga:TCGA-ZG-A9L0	prad_tcga:TCGA-EJ-5518
prad_tcga:TCGA-VP-A87J	prad_tcga:TCGA-KK-A59V
prad_tcga:TCGA-V1-A9OQ	prad_tcga:TCGA-HC-7079
prad_tcga:TCGA-EJ-7786	prad_tcga:TCGA-CH-5741
prad_tcga:TCGA-VN-A88K	prad_tcga:TCGA-HC-7211
prad_tcga:TCGA-KK-A7AP	prad_tcga:TCGA-FC-A4JI
prad_tcga:TCGA-TP-A8TT	prad_tcga:TCGA-XQ-A8TA
prad_tcga:TCGA-CH-5790	prad_tcga:TCGA-J9-A8CL
prad_tcga:TCGA-HC-A8D0	prad_tcga:TCGA-ZG-A9M4
prad_tcga:TCGA-2A-A8W1	prad_tcga:TCGA-QU-A6IN
prad_tcga:TCGA-HC-A4ZV	prad_tcga:TCGA-EJ-A65D
prad_tcga:TCGA-EJ-A46E	prad_tcga:TCGA-EJ-7789
prad_tcga:TCGA-YL-A9WX	prad_tcga:TCGA-EJ-5525
prad_tcga:TCGA-VP-A87C	prad_tcga:TCGA-YL-A8SC
prad_tcga:TCGA-G9-6498	prad_tcga:TCGA-FC-A5OB
prad_tcga:TCGA-KK-A6E8	prad_tcga:TCGA-J9-A52C
prad_tcga:TCGA-KK-A7AW	prad_tcga:TCGA-KK-A8ID
prad_tcga:TCGA-YL-A8SP	prad_tcga:TCGA-CH-5753
prad_tcga:TCGA-YL-A8SH	prad_tcga:TCGA-CH-5788
prad_tcga:TCGA-G9-7521	prad_tcga:TCGA-EJ-5526
prad_tcga:TCGA-EJ-A65E	prad_tcga:TCGA-HC-A6AN
prad_tcga:TCGA-KK-A7AY	prad_tcga:TCGA-EJ-7781
prad_tcga:TCGA-HC-A9TE	prad_tcga:TCGA-CH-5751
prad_tcga:TCGA-M7-A725	prad_tcga:TCGA-EJ-7783
prad_tcga:TCGA-CH-5766	prad_tcga:TCGA-KC-A7F5
prad_tcga:TCGA-EJ-5515	prad_tcga:TCGA-KK-A6E4
prad_tcga:TCGA-ZG-A9N3	prad_tcga:TCGA-XK-AAK1
prad_tcga:TCGA-VP-A87K	prad_tcga:TCGA-VP-A875
prad_tcga:TCGA-CH-5769	prad_tcga:TCGA-J4-A67S
prad_tcga:TCGA-J4-A83K	prad_tcga:TCGA-J9-A8CP
prad_tcga:TCGA-KC-A4BV	prad_tcga:TCGA-FC-A8O0
prad_tcga:TCGA-EJ-7330	prad_tcga:TCGA-J4-A83N
prad_tcga:TCGA-HC-A8CY	prad_tcga:TCGA-CH-5761
prad_tcga:TCGA-EJ-7785	prad_tcga:TCGA-EJ-8469
prad_tcga:TCGA-EJ-5495	prad_tcga:TCGA-HC-7212
prad_tcga:TCGA-2A-A8VT	prad_tcga:TCGA-HC-A9TH
prad_tcga:TCGA-EJ-7327	prad_msk_stopsack_2021:P-0016538
prad_tcga:TCGA-YL-A8SJ	prad_msk_stopsack_2021:P-0024650
prad_tcga:TCGA-HC-A6AO	prad_msk_stopsack_2021:P-0015570
prad_tcga:TCGA-HC-A6AL	prad_msk_stopsack_2021:P-0009892
prad_tcga:TCGA-KK-A6E3	prad_msk_stopsack_2021:P-0024660
prad_tcga:TCGA-ZG-A9LS	prad_msk_stopsack_2021:P-0040838
prad_tcga:TCGA-EJ-5519	prad_msk_stopsack_2021:P-0050196
prad_tcga:TCGA-VP-A87D	prad_msk_stopsack_2021:P-0032288
prad_tcga:TCGA-J9-A52D	prad_msk_stopsack_2021:P-0024219
prad_tcga:TCGA-XK-AAJP	prad_msk_stopsack_2021:P-0013000
prad_tcga:TCGA-G9-6366	prad_msk_stopsack_2021:P-0046590
prad_tcga:TCGA-TP-A8TV	prad_msk_stopsack_2021:P-0035426
prad_tcga:TCGA-2A-AAYF	prad_msk_stopsack_2021:P-0022120
prad_tcga:TCGA-EJ-A65G	prad_msk_stopsack_2021:P-0044915
prad_tcga:TCGA-G9-6369	prad_msk_stopsack_2021:P-0026774
prad_tcga:TCGA-J4-AAU2	prad_msk_stopsack_2021:P-0034070
prad_tcga:TCGA-VN-A88O	prad_msk_stopsack_2021:P-0008682
prad_tcga:TCGA-Y6-A8TL	prad_msk_stopsack_2021:P-0035133
prad_tcga:TCGA-V1-A9ZR	prad_msk_stopsack_2021:P-0023405
prad_tcga:TCGA-HC-A48F	prad_msk_stopsack_2021:P-0004387
prad_tcga:TCGA-EJ-5505	prad_msk_stopsack_2021:P-0045357
prad_tcga:TCGA-YL-A9WY	prad_msk_stopsack_2021:P-0004910
prad_tcga:TCGA-ZG-A9L4	prad_msk_stopsack_2021:P-0030628
prad_tcga:TCGA-YL-A8SL	prad_msk_stopsack_2021:P-0034845
prad_tcga:TCGA-J9-A8CN	prad_msk_stopsack_2021:P-0036805
prad_tcga:TCGA-YL-A8S9	prad_msk_stopsack_2021:P-0031855
prad_tcga:TCGA-G9-A9S7	prad_msk_stopsack_2021:P-0032154
prad_tcga:TCGA-J4-AATZ	prad_msk_stopsack_2021:P-0043336
prad_tcga:TCGA-G9-6378	prad_msk_stopsack_2021:P-0049144
prad_tcga:TCGA-G9-6332	prad_msk_stopsack_2021:P-0001446
prad_tcga:TCGA-HC-8256	prad_msk_stopsack_2021:P-0003450
prad_tcga:TCGA-VN-A88N	prad_msk_stopsack_2021:P-0018607
prad_tcga:TCGA-XJ-A83G	prad_msk_stopsack_2021:P-0008048
prad_tcga:TCGA-CH-5771	prad_msk_stopsack_2021:P-0005216
prad_tcga:TCGA-EJ-5517	prad_msk_stopsack_2021:P-0010382
prad_tcga:TCGA-KK-A8I7	prad_msk_stopsack_2021:P-0026409
prad_tcga:TCGA-ZG-A9L5	prad_msk_stopsack_2021:P-0021928
prad_tcga:TCGA-YJ-A8SW	prad_msk_stopsack_2021:P-0000755
prad_tcga:TCGA-EJ-7331	prad_msk_stopsack_2021:P-0008461
prad_tcga:TCGA-EJ-5530	prad_msk_stopsack_2021:P-0018489
prad_tcga:TCGA-EJ-7125	prad_msk_stopsack_2021:P-0034876
prad_tcga:TCGA-EJ-7782	prad_msk_stopsack_2021:P-0021600
prad_tcga:TCGA-HC-7748	prad_msk_stopsack_2021:P-0004474
prad_tcga:TCGA-CH-5737	prad_msk_stopsack_2021:P-0030717
prad_tcga:TCGA-EJ-5497	prad_msk_stopsack_2021:P-0018147
prad_tcga:TCGA-HC-7819	prad_msk_stopsack_2021:P-0001426
prad_tcga:TCGA-HC-7231	prad_msk_stopsack_2021:P-0010240
prad_tcga:TCGA-HC-7078	prad_msk_stopsack_2021:P-0028587
prad_tcga:TCGA-VP-A87H	prad_msk_stopsack_2021:P-0010529
prad_tcga:TCGA-EJ-5507	prad_msk_stopsack_2021:P-0017543
prad_tcga:TCGA-HC-7742	prad_msk_stopsack_2021:P-0008682
prad_tcga:TCGA-KC-A4BN	prad_msk_stopsack_2021:P-0001446
prad_tcga:TCGA-ZG-A8QY	prad_msk_stopsack_2021:P-0003450
prad_tcga:TCGA-V1-A8MU	prad_msk_stopsack_2021:P-0008048
prad_tcga:TCGA-V1-A9ZI	prad_msk_stopsack_2021:P-0005216
prad_tcga:TCGA-KC-A7F6	prad_msk_stopsack_2021:P-0003597
prad_tcga:TCGA-KK-A7B4	prad_msk_stopsack_2021:P-0000755
prad_tcga:TCGA-CH-5744	prad_msk_stopsack_2021:P-0008461
prad_tcga:TCGA-EJ-A46F	prad_msk_stopsack_2021:P-0001426
prad_tcga:TCGA-EJ-7312	prad_p1000:TCGA-XK-AAIW
prad_tcga:TCGA-H9-A6BY	prad_p1000:06-134H1_LN
prad_tcga:TCGA-V1-A8X3	prad_p1000:SC_9058
prad_tcga:TCGA-YL-A8SA	prad_p1000:SC_9047
prad_tcga:TCGA-YL-A8SR	prad_p1000:TCGA-J9-A52C
prad_msk_stopsack_2021:P-0011377	prad_p1000:MO_1012
prad_msk_stopsack_2021:P-0046881	prad_p1000:12729
prad_msk_stopsack_2021:P-0022557	prad_p1000:01-087MM_BONE
prad_msk_stopsack_2021:P-0021853	prad_p1000:SC_9054
prad_msk_stopsack_2021:P-0001774	prad_p1000:SC_9163
prad_msk_stopsack_2021:P-0040786	prad_p1000:SC_9008
prad_msk_stopsack_2021:P-0009044	prad_p1000:PRAD-6115398.0-SM-7LGUK
prad_msk_stopsack_2021:P-0019580	prad_p1000:PROS01448-6115219-SM-67ERS
prad_msk_stopsack_2021:P-0001325	prad_p1000:TP_2010
prad_msk_stopsack_2021:P-0019937	prad_p1000:PROS01448-DFCI.10-448.P29-SM-5CQ4S
prad_msk_stopsack_2021:P-0029645	prad_p1000:MO_1447
prad_msk_stopsack_2021:P-0009699	prad_p1000:TP_2060
prad_msk_stopsack_2021:P-0012104	prad_p1000:PR-09-3421
prad_msk_stopsack_2021:P-0013502	prad_p1000:TCGA-HC-A9TH
prad_msk_stopsack_2021:P-0015211	prad_p1000:TCGA-KK-A59V
prad_msk_stopsack_2021:P-0020784	prad_p1000:MO_1410
prad_msk_stopsack_2021:P-0023067	prad_p1000:TCGA-EJ-5525
prad_msk_stopsack_2021:P-0028071	prad_p1000:26731
prad_msk_stopsack_2021:P-0034039	prad_cdk12_mskcc_2020:P-0016538
prad_msk_stopsack_2021:P-0034277	prad_cdk12_mskcc_2020:P-0013000
prad_msk_stopsack_2021:P-0044899	prad_cdk12_mskcc_2020:P-0012104
prad_msk_stopsack_2021:P-0047234	prad_cdk12_mskcc_2020:P-0026774
prad_msk_stopsack_2021:P-0025793	prad_cdk12_mskcc_2020:P-0032154
prad_msk_stopsack_2021:P-0037427	prad_cdk12_mskcc_2020:P-0001446
prad_msk_stopsack_2021:P-0021525	prad_cdk12_mskcc_2020:P-0003450
prad_msk_stopsack_2021:P-0022383	prad_cdk12_mskcc_2020:P-0018607
prad_msk_stopsack_2021:P-0010309	prad_cdk12_mskcc_2020:P-0008048
prad_msk_stopsack_2021:P-0042971	prad_cdk12_mskcc_2020:P-0015206
prad_msk_stopsack_2021:P-0037871	prad_cdk12_mskcc_2020:P-0005216
prad_msk_stopsack_2021:P-0002740	prad_cdk12_mskcc_2020:P-0026409
prad_msk_stopsack_2021:P-0034253	prad_cdk12_mskcc_2020:P-0008461
prad_msk_stopsack_2021:P-0007629	prad_cdk12_mskcc_2020:P-0018489
prad_msk_stopsack_2021:P-0010034	prad_cdk12_mskcc_2020:P-0030717
prad_msk_stopsack_2021:P-0019199	prad_cdk12_mskcc_2020:P-0001426
prad_msk_stopsack_2021:P-0034298	prad_cdk12_mskcc_2020:P-0010240
prad_msk_stopsack_2021:P-0006655	prad_cdk12_mskcc_2020:P-0028587
prad_msk_stopsack_2021:P-0007515	prad_cdk12_mskcc_2020:P-0010529
prad_msk_stopsack_2021:P-0008771	prad_cdk12_mskcc_2020:P-0015628
prad_msk_stopsack_2021:P-0012025	prad_cdk12_mskcc_2020:P-0017543
prad_msk_stopsack_2021:P-0016248	prad_cdk12_mskcc_2020:P-0016538
prad_msk_stopsack_2021:P-0018235	prad_cdk12_mskcc_2020:P-0013000
prad_msk_stopsack_2021:P-0030976	prad_pik3r1_msk_2021:P-0023380
prad_msk_stopsack_2021:P-0027722	prad_pik3r1_msk_2021:P-0026774
prad_msk_stopsack_2021:P-0023741	prad_pik3r1_msk_2021:P-0055314
prad_msk_stopsack_2021:P-0014009	prad_pik3r1_msk_2021:P-0051484
prad_msk_stopsack_2021:P-0009402	prad_pik3r1_msk_2021:P-0049144
prad_msk_stopsack_2021:P-0014408	prad_pik3r1_msk_2021:P-0018607
prad_msk_stopsack_2021:P-0015991	prad_pik3r1_msk_2021:P-0008048
prad_msk_stopsack_2021:P-0031856	prad_pik3r1_msk_2021:P-0056098
prad_msk_stopsack_2021:P-0042035	prad_pik3r1_msk_2021:P-0008461
prad_msk_stopsack_2021:P-0048490	prad_pik3r1_msk_2021:P-0018489
prad_msk_stopsack_2021:P-0001884	prad_pik3r1_msk_2021:P-0030717
prad_msk_stopsack_2021:P-0017169	prad_pik3r1_msk_2021:P-0001426
prad_msk_stopsack_2021:P-0023839	prad_pik3r1_msk_2021:P-0010240
prad_msk_stopsack_2021:P-0040519	prad_pik3r1_msk_2021:P-0017543
prad_msk_stopsack_2021:P-0019624	prad_su2c_2019:1115378
prad_msk_stopsack_2021:P-0047806	prad_su2c_2019:9115111
prad_msk_stopsack_2021:P-0050086	prad_su2c_2019:6115012
prad_msk_stopsack_2021:P-0000683	prad_su2c_2019:5115410
prad_msk_stopsack_2021:P-0019782	prad_su2c_2019:9115062
prad_msk_stopsack_2021:P-0029852	prad_su2c_2019:5115196
prad_msk_stopsack_2021:P-0011090	prad_su2c_2019:5115615
prad_msk_stopsack_2021:P-0005756	prad_su2c_2019:5115614
prad_msk_stopsack_2021:P-0030675	prad_su2c_2019:9115036
prad_msk_stopsack_2021:P-0001021	prad_su2c_2019:97115281
prad_msk_stopsack_2021:P-0010746	prad_su2c_2019:9115515
prad_msk_stopsack_2021:P-0021698	prad_su2c_2019:5115026
prad_msk_stopsack_2021:P-0040003	prad_su2c_2019:5115359
prad_msk_stopsack_2021:P-0050553	prad_su2c_2019:1115531
prad_msk_stopsack_2021:P-0002894	prad_su2c_2019:97115005
prad_msk_stopsack_2021:P-0003468	prad_su2c_2019:9115524
prad_msk_stopsack_2021:P-0019840	prad_su2c_2019:9115184
prad_msk_stopsack_2021:P-0036176	prad_su2c_2019:9115571
prad_msk_stopsack_2021:P-0003592	prad_su2c_2019:5115648
prad_msk_stopsack_2021:P-0003665	prad_su2c_2019:5115022
prad_msk_stopsack_2021:P-0005047	prad_su2c_2019:97115563
prad_msk_stopsack_2021:P-0005787	prad_su2c_2019:97115009
prad_msk_stopsack_2021:P-0008591	prad_su2c_2019:97115079
prad_msk_stopsack_2021:P-0009056	prad_su2c_2019:9115065
prad_msk_stopsack_2021:P-0009679	prad_su2c_2019:5115078
prad_msk_stopsack_2021:P-0009818	prad_su2c_2019:5115073
prad_msk_stopsack_2021:P-0010953	prad_su2c_2019:97115358
prad_msk_stopsack_2021:P-0011437	prad_su2c_2019:5115408
prad_msk_stopsack_2021:P-0013372	prad_su2c_2019:5115033
prad_msk_stopsack_2021:P-0016288	prad_su2c_2019:6115593
prad_msk_stopsack_2021:P-0016307	prad_su2c_2019:5115506
prad_msk_stopsack_2021:P-0017944	prad_su2c_2019:9115107
prad_msk_stopsack_2021:P-0018956	prad_su2c_2019:9115052
prad_msk_stopsack_2021:P-0020394	prad_su2c_2019:1115308
prad_msk_stopsack_2021:P-0022611	prad_su2c_2019:9115415
prad_msk_stopsack_2021:P-0025139	prad_su2c_2019:9115067
prad_msk_stopsack_2021:P-0025571	prad_su2c_2019:9115325
prad_msk_stopsack_2021:P-0029105	prad_su2c_2019:97115335
prad_msk_stopsack_2021:P-0035472	prad_su2c_2019:9115050
prad_msk_stopsack_2021:P-0041549	prad_su2c_2019:5115613
prad_msk_stopsack_2021:P-0048980	prad_su2c_2019:9115181
prad_msk_stopsack_2021:P-0049427	prad_su2c_2019:9115051
prad_msk_stopsack_2021:P-0003101	prad_su2c_2019:97115376
prad_msk_stopsack_2021:P-0050289	prad_su2c_2019:97115007
prad_msk_stopsack_2021:P-0001071	prad_su2c_2019:97115558
prad_msk_stopsack_2021:P-0008098	prad_su2c_2019:97115560
prad_msk_stopsack_2021:P-0015345	prad_su2c_2019:1115503
prad_msk_stopsack_2021:P-0000441	prad_su2c_2019:6115219
prad_msk_stopsack_2021:P-0003945	prad_su2c_2019:6115114
prad_msk_stopsack_2021:P-0004448	prad_su2c_2019:13115277
prad_msk_stopsack_2021:P-0004489	prad_su2c_2019:9115339
prad_msk_stopsack_2021:P-0004704	prad_su2c_2019:9115104
prad_msk_stopsack_2021:P-0005344	prad_su2c_2019:9115519
prad_msk_stopsack_2021:P-0005374	prad_su2c_2019:5115608
prad_msk_stopsack_2021:P-0005428	prad_su2c_2019:9115041
prad_msk_stopsack_2021:P-0008315	prad_su2c_2019:97115147
prad_msk_stopsack_2021:P-0011155	prad_su2c_2019:97115561
prad_msk_stopsack_2021:P-0011290	prad_su2c_2019:5115260
prad_msk_stopsack_2021:P-0011368	prad_su2c_2019:5115057
prad_msk_stopsack_2021:P-0014701	prad_su2c_2019:9115552
prad_msk_stopsack_2021:P-0016883	prad_su2c_2019:5115276
prad_msk_stopsack_2021:P-0018315	prad_su2c_2019:9115516
prad_msk_stopsack_2021:P-0018605	prad_su2c_2019:9115047
prad_msk_stopsack_2021:P-0020792	prad_su2c_2019:9115580
prad_msk_stopsack_2021:P-0021355	prad_su2c_2019:5115187
prad_msk_stopsack_2021:P-0021561	prad_su2c_2019:97115454
prad_msk_stopsack_2021:P-0023170	prad_su2c_2019:97115315
prad_msk_stopsack_2021:P-0024538	prad_mcspc_mskcc_2020:P-0024660
prad_msk_stopsack_2021:P-0027210	prad_mcspc_mskcc_2020:P-0009006
prad_msk_stopsack_2021:P-0030625	prad_mcspc_mskcc_2020:P-0013000
prad_msk_stopsack_2021:P-0032212	prad_mcspc_mskcc_2020:P-0022120
prad_msk_stopsack_2021:P-0039234	prad_mcspc_mskcc_2020:P-0007930
prad_msk_stopsack_2021:P-0041059	prad_mcspc_mskcc_2020:P-0026774
prad_msk_stopsack_2021:P-0044808	prad_mcspc_mskcc_2020:P-0008682
prad_msk_stopsack_2021:P-0044927	prad_mcspc_mskcc_2020:P-0026409
prad_msk_stopsack_2021:P-0047211	prad_mcspc_mskcc_2020:P-0018489
prad_msk_stopsack_2021:P-0018117	prad_mcspc_mskcc_2020:P-0001426
prad_msk_stopsack_2021:P-0012928	prad_mcspc_mskcc_2020:P-0028587
prad_msk_stopsack_2021:P-0030383	prad_mcspc_mskcc_2020:P-0010529
prad_msk_stopsack_2021:P-0014076	prad_mcspc_mskcc_2020:P-0017543
prad_msk_stopsack_2021:P-0001297	prad_mskcc:PCA0213
prad_msk_stopsack_2021:P-0008655	prad_mskcc:PCA0080
prad_msk_stopsack_2021:P-0022179	prad_mskcc:PCA0099
prad_msk_stopsack_2021:P-0027197	prad_mskcc:PCA0206
prad_msk_stopsack_2021:P-0027593	prad_mskcc:PCA0209
prad_msk_stopsack_2021:P-0035809	prad_mskcc:PCA0180
prad_msk_stopsack_2021:P-0042174	prad_mskcc:PCA0189
prad_msk_stopsack_2021:P-0042711	prad_mskcc:PCA0194
prad_msk_stopsack_2021:P-0032550	prad_mskcc:PCA0173
prad_msk_stopsack_2021:P-0017097	prad_mskcc:PCA0058
prad_msk_stopsack_2021:P-0032868	prad_mskcc:PCA0211
prad_msk_stopsack_2021:P-0049590	prad_mskcc:PCA0144
prad_msk_stopsack_2021:P-0009399	prad_mskcc_2017:P-0000683
prad_msk_stopsack_2021:P-0047470	prad_mskcc_2017:P-0004312
prad_msk_stopsack_2021:P-0006994	prad_mskcc_2017:P-0007043
prad_msk_stopsack_2021:P-0014299	prad_mskcc_2017:P-0003665
prad_msk_stopsack_2021:P-0001128	prad_mskcc_2017:P-0001446
prad_msk_stopsack_2021:P-0028102	prad_mskcc_2017:P-0003033
prad_msk_stopsack_2021:P-0030801	prad_mskcc_2017:P-0003468
prad_msk_stopsack_2021:P-0009904	prad_mskcc_2017:P-0003535
prad_msk_stopsack_2021:P-0016941	prad_mskcc_2017:P-0005436
prad_msk_stopsack_2021:P-0038415	prad_mskcc_2017:P-0006635
prad_msk_stopsack_2021:P-0030645	prostate_dkfz_2018:ICGC_PCA044
prad_msk_stopsack_2021:P-0039446	prostate_dkfz_2018:ICGC_PCA125
prad_msk_stopsack_2021:P-0010752	prostate_dkfz_2018:ICGC_PCAL05
prad_msk_stopsack_2021:P-0022249	prostate_dkfz_2018:ICGC_PCAL11
prad_msk_stopsack_2021:P-0023605	nepc_wcm_2016:WCMC158
prad_msk_stopsack_2021:P-0048047	nepc_wcm_2016:WCMC162
prad_msk_stopsack_2021:P-0050539
prad_msk_stopsack_2021:P-0008920
prad_msk_stopsack_2021:P-0034472
prad_msk_stopsack_2021:P-0029164
prad_msk_stopsack_2021:P-0026117
prad_msk_stopsack_2021:P-0006057
prad_msk_stopsack_2021:P-0007874
prad_msk_stopsack_2021:P-0009352
prad_msk_stopsack_2021:P-0013115
prad_msk_stopsack_2021:P-0017892
prad_msk_stopsack_2021:P-0024898
prad_msk_stopsack_2021:P-0027245
prad_msk_stopsack_2021:P-0031771
prad_msk_stopsack_2021:P-0036349
prad_msk_stopsack_2021:P-0029323
prad_msk_stopsack_2021:P-0002206
prad_msk_stopsack_2021:P-0003400
prad_msk_stopsack_2021:P-0004539
prad_msk_stopsack_2021:P-0005773
prad_msk_stopsack_2021:P-0005867
prad_msk_stopsack_2021:P-0012741
prad_msk_stopsack_2021:P-0014522
prad_msk_stopsack_2021:P-0015064
prad_msk_stopsack_2021:P-0015206
prad_msk_stopsack_2021:P-0015278
prad_msk_stopsack_2021:P-0015850
prad_msk_stopsack_2021:P-0015927
prad_msk_stopsack_2021:P-0017940
prad_msk_stopsack_2021:P-0021271
prad_msk_stopsack_2021:P-0022904
prad_msk_stopsack_2021:P-0024488
prad_msk_stopsack_2021:P-0025880
prad_msk_stopsack_2021:P-0026152
prad_msk_stopsack_2021:P-0027454
prad_msk_stopsack_2021:P-0027526
prad_msk_stopsack_2021:P-0030261
prad_msk_stopsack_2021:P-0033465
prad_msk_stopsack_2021:P-0033969
prad_msk_stopsack_2021:P-0034188
prad_msk_stopsack_2021:P-0036162
prad_msk_stopsack_2021:P-0036164
prad_msk_stopsack_2021:P-0037620
prad_msk_stopsack_2021:P-0038299
prad_msk_stopsack_2021:P-0038672
prad_msk_stopsack_2021:P-0041027
prad_msk_stopsack_2021:P-0041628
prad_msk_stopsack_2021:P-0041838
prad_msk_stopsack_2021:P-0042135
prad_msk_stopsack_2021:P-0046460
prad_msk_stopsack_2021:P-0030812
prad_msk_stopsack_2021:P-0011483
prad_msk_stopsack_2021:P-0023866
prad_msk_stopsack_2021:P-0028306
prad_msk_stopsack_2021:P-0030640
prad_msk_stopsack_2021:P-0036511
prad_msk_stopsack_2021:P-0045291
prad_msk_stopsack_2021:P-0015628
prad_msk_stopsack_2021:P-0005976
prad_msk_stopsack_2021:P-0031720
prad_msk_stopsack_2021:P-0005697
prad_msk_stopsack_2021:P-0023345
prad_msk_stopsack_2021:P-0002499
prad_msk_stopsack_2021:P-0002898
prad_msk_stopsack_2021:P-0009090
prad_msk_stopsack_2021:P-0012543
prad_msk_stopsack_2021:P-0013022
prad_msk_stopsack_2021:P-0017889
prad_msk_stopsack_2021:P-0019520
prad_msk_stopsack_2021:P-0020218
prad_msk_stopsack_2021:P-0021854
prad_msk_stopsack_2021:P-0029469
prad_msk_stopsack_2021:P-0030202
prad_msk_stopsack_2021:P-0031426
prad_msk_stopsack_2021:P-0021310
prad_msk_stopsack_2021:P-0011465
prad_msk_stopsack_2021:P-0036029
prad_msk_stopsack_2021:P-0032646
prad_msk_stopsack_2021:P-0001242
prad_msk_stopsack_2021:P-0001697
prad_msk_stopsack_2021:P-0001768
prad_msk_stopsack_2021:P-0002840
prad_msk_stopsack_2021:P-0002880
prad_msk_stopsack_2021:P-0003033
prad_msk_stopsack_2021:P-0003052
prad_msk_stopsack_2021:P-0003442
prad_msk_stopsack_2021:P-0003535
prad_msk_stopsack_2021:P-0005064
prad_msk_stopsack_2021:P-0005436
prad_msk_stopsack_2021:P-0005535
prad_msk_stopsack_2021:P-0005546
prad_msk_stopsack_2021:P-0005571
prad_msk_stopsack_2021:P-0006247
prad_msk_stopsack_2021:P-0006635
prad_msk_stopsack_2021:P-0006749
prad_msk_stopsack_2021:P-0007267
prad_msk_stopsack_2021:P-0007307
prad_msk_stopsack_2021:P-0007313
prad_msk_stopsack_2021:P-0007332
prad_msk_stopsack_2021:P-0007343
prad_msk_stopsack_2021:P-0007734
prad_msk_stopsack_2021:P-0007877
prad_msk_stopsack_2021:P-0007900
prad_msk_stopsack_2021:P-0008383
prad_msk_stopsack_2021:P-0008812
prad_msk_stopsack_2021:P-0008858
prad_msk_stopsack_2021:P-0009448
prad_msk_stopsack_2021:P-0010523
prad_msk_stopsack_2021:P-0011577
prad_msk_stopsack_2021:P-0012109
prad_msk_stopsack_2021:P-0012834
prad_msk_stopsack_2021:P-0012929
prad_msk_stopsack_2021:P-0013037
prad_msk_stopsack_2021:P-0013526
prad_msk_stopsack_2021:P-0013733
prad_msk_stopsack_2021:P-0014991
prad_msk_stopsack_2021:P-0015452
prad_msk_stopsack_2021:P-0015552
prad_msk_stopsack_2021:P-0016134
prad_msk_stopsack_2021:P-0016236
prad_msk_stopsack_2021:P-0016930
prad_msk_stopsack_2021:P-0017287
prad_msk_stopsack_2021:P-0017686
prad_msk_stopsack_2021:P-0020132
prad_msk_stopsack_2021:P-0020812
prad_msk_stopsack_2021:P-0021240
prad_msk_stopsack_2021:P-0021547
prad_msk_stopsack_2021:P-0021711
prad_msk_stopsack_2021:P-0021782
prad_msk_stopsack_2021:P-0022060
prad_msk_stopsack_2021:P-0022430
prad_msk_stopsack_2021:P-0022470
prad_msk_stopsack_2021:P-0022865
prad_msk_stopsack_2021:P-0023401
prad_msk_stopsack_2021:P-0023594
prad_msk_stopsack_2021:P-0024097
prad_msk_stopsack_2021:P-0024220
prad_msk_stopsack_2021:P-0027350
prad_msk_stopsack_2021:P-0027823
prad_msk_stopsack_2021:P-0028090
prad_msk_stopsack_2021:P-0028775
prad_msk_stopsack_2021:P-0033114
prad_msk_stopsack_2021:P-0033832
prad_msk_stopsack_2021:P-0034278
prad_msk_stopsack_2021:P-0035107
prad_msk_stopsack_2021:P-0035208
prad_msk_stopsack_2021:P-0035807
prad_msk_stopsack_2021:P-0035854
prad_msk_stopsack_2021:P-0036352
prad_msk_stopsack_2021:P-0036804
prad_msk_stopsack_2021:P-0037126
prad_msk_stopsack_2021:P-0040243
prad_msk_stopsack_2021:P-0040334
prad_msk_stopsack_2021:P-0041631
prad_msk_stopsack_2021:P-0041944
prad_msk_stopsack_2021:P-0043581
prad_msk_stopsack_2021:P-0044793
prad_msk_stopsack_2021:P-0045238
prad_msk_stopsack_2021:P-0045286
prad_msk_stopsack_2021:P-0047574
prad_msk_stopsack_2021:P-0047763
prad_msk_stopsack_2021:P-0047937
prad_msk_stopsack_2021:P-0048031
prad_msk_stopsack_2021:P-0048085
prad_msk_stopsack_2021:P-0048150
prad_msk_stopsack_2021:P-0048500
prad_msk_stopsack_2021:P-0050540
prad_msk_stopsack_2021:P-0001774
prad_msk_stopsack_2021:P-0009044
prad_msk_stopsack_2021:P-0001325
prad_msk_stopsack_2021:P-0002740
prad_msk_stopsack_2021:P-0007629
prad_msk_stopsack_2021:P-0006655
prad_msk_stopsack_2021:P-0007515
prad_msk_stopsack_2021:P-0008771
prad_msk_stopsack_2021:P-0001884
prad_msk_stopsack_2021:P-0000683
prad_msk_stopsack_2021:P-0005756
prad_msk_stopsack_2021:P-0001021
prad_msk_stopsack_2021:P-0002894
prad_msk_stopsack_2021:P-0003468
prad_msk_stopsack_2021:P-0003592
prad_msk_stopsack_2021:P-0003665
prad_msk_stopsack_2021:P-0005047
prad_msk_stopsack_2021:P-0005787
prad_msk_stopsack_2021:P-0008591
prad_msk_stopsack_2021:P-0009056
prad_msk_stopsack_2021:P-0003101
prad_msk_stopsack_2021:P-0001071
prad_msk_stopsack_2021:P-0008098
prad_msk_stopsack_2021:P-0000441
prad_msk_stopsack_2021:P-0000966
prad_msk_stopsack_2021:P-0004448
prad_msk_stopsack_2021:P-0004489
prad_msk_stopsack_2021:P-0004704
prad_msk_stopsack_2021:P-0005344
prad_msk_stopsack_2021:P-0005374
prad_msk_stopsack_2021:P-0005428
prad_msk_stopsack_2021:P-0008315
prad_msk_stopsack_2021:P-0000560
prad_msk_stopsack_2021:P-0001297
prad_msk_stopsack_2021:P-0008655
prad_msk_stopsack_2021:P-0006994
prad_msk_stopsack_2021:P-0001128
prad_msk_stopsack_2021:P-0008920
prad_mskcc_2017:P-0006029
prad_mskcc_2017:P-0002149
prad_mskcc_2017:P-0006057
prad_mskcc_2017:P-0007874
prad_mskcc_2017:P-0009352
prad_mskcc_2017:P-0002206
prad_mskcc_2017:P-0003400
prad_mskcc_2017:P-0004539
prad_mskcc_2017:P-0005773
prad_mskcc_2017:P-0005867
prad_mskcc_2017:P-0001141
prad_mskcc_2017:P-0005976
prad_mskcc_2017:P-0005697
prad_mskcc_2017:P-0002499
prad_mskcc_2017:P-0002898
prad_mskcc_2017:P-0009090
prad_mskcc_2017:P-0001242
prad_mskcc_2017:P-0001697
prad_mskcc_2017:P-0001768
prad_mskcc_2017:P-0002840
prad_mskcc_2017:P-0002880
prad_mskcc_2017:P-0003033
prad_mskcc_2017:P-0003052
prad_mskcc_2017:P-0003442
prad_mskcc_2017:P-0003535
prad_mskcc_2017:P-0004285
prad_mskcc_2017:P-0004597
prad_mskcc_2017:P-0005064
prad_mskcc_2017:P-0005436
prad_mskcc_2017:P-0005546
prad_mskcc_2017:P-0005571
prad_mskcc_2017:P-0006247
prad_mskcc_2017:P-0006635
prad_mskcc_2017:P-0006749
prad_mskcc_2017:P-0007267
prad_mskcc_2017:P-0007307
prad_mskcc_2017:P-0007313
prad_mskcc_2017:P-0007332
prad_mskcc_2017:P-0007343
prad_mskcc_2017:P-0007734
prad_mskcc_2017:P-0007877
prad_mskcc_2017:P-0007900
prad_mskcc_2017:P-0008383
prad_mskcc_2017:P-0008812
prad_mskcc_2017:P-0008858
prad_p1000:AAPC-STID0000006860-Tumor-SM-2XU12
prad_p1000:21010
prad_p1000:TP_2079
prad_p1000:99-091J_LN
prad_p1000:PROS12319B-SU2C-06115115-SM-4W2NA
prad_p1000:03-163S4_LIVER
prad_p1000:PR-09-5094
prad_p1000:TCGA-KC-A4BV
prad_p1000:03-082H1_LIVER
prad_p1000:TCGA-CH-5768
prad_p1000:PRAD-6115395.0-SM-7LGUH
prad_p1000:08-006H1_LN
prad_p1000:SC_9043
prad_p1000:TCGA-HC-A48F
prad_p1000:PROS10448-1115126-SM-5EEBI
prad_p1000:SC_9107
prad_p1000:TCGA-HC-7078
prad_p1000:SC_9136
prad_p1000:98-372L_LN
prad_p1000:PROS11496-6115320-SM-6CNQ4
prad_p1000:TCGA-HC-A9TE
prad_p1000:TCGA-V1-A9ZI
prad_p1000:SC_9141
prad_p1000:00-029N9_LN
prad_p1000:SC_9046
prad_p1000:PROS10448-SUTC.01115092-SM-4JC74
prad_p1000:PROS10448-SUTC.01115082-SM-4JC6B
prad_p1000:MO_1241
prad_p1000:SC_9029
prad_p1000:SC_9097
prad_p1000:SC_9096
prad_p1000:07-062F2_LUNG
prad_p1000:PROS11496-6115319-SM-6CNQ3
prad_p1000:PM124
prad_p1000:SC_9021
prad_p1000:PRAD-6115391.0-SM-7LGUD
prad_p1000:MO_1014
prad_p1000:MO_1244
prad_p1000:PM119
prad_p1000:PM189
prad_p1000:PRAD-6115394.0-SM-7LGUG
prad_p1000:PRAD-6115400.0-SM-7LGUM
prad_p1000:SC_9016
prad_p1000:SC_9061
prad_p1000:SC_9091
prad_p1000:SC_9148
prad_p1000:MO_1139
prad_p1000:MO_1184
prad_p1000:PROS12319B-SU2C-06115117-SM-4W2NC
prad_p1000:PM156
prad_p1000:PROS11496-6115321-SM-6CNQ5
prad_p1000:05-011G4_LUNG
prad_p1000:MO_1040
prad_p1000:MO_1132
prad_p1000:MO_1316
prad_p1000:PROS01448-1115161-SM-5SGU1
prad_p1000:PROS01448-1115244-SM-5SGU6
prad_p1000:PROS01448-6115227-SM-67ERU
prad_p1000:PROS01448-6115250-SM-67ES4
prad_p1000:PROS10448-SUTC.01115081-SM-4JC6A
prad_p1000:PROS10448-SUTC.01115084-SM-4JC6H
prad_p1000:PROS11496-6115236-SM-6CNPW
prad_p1000:PROS12319B-SU2C-06115114-SM-4W2N9
prad_p1000:SC_9006
prad_p1000:SC_9007
prad_p1000:SC_9011
prad_p1000:SC_9056
prad_p1000:SC_9065
prad_p1000:SC_9081
prad_p1000:SC_9145
prad_p1000:TP_2032
prad_p1000:11040
prad_p1000:MO_1084
prad_p1000:AAPC-STID0000003057-Tumor-SM-2XTZT
prad_p1000:SC_9144
prad_p1000:SC_9165
prad_p1000:TCGA-FC-A8O0
prad_p1000:TCGA-VP-A875
prad_p1000:TP_2034
prad_p1000:AAPC-IP_LG-043-Tumor-SM-3NC6F
prad_p1000:05-165O_ADRENAL
prad_p1000:MO_1074
prad_p1000:TCGA-CH-5771
prad_p1000:MO_1095
prad_p1000:SC_9060
prad_p1000:PR-04-639
prad_p1000:PR-09-2517
prad_p1000:PR-09-2744
prad_p1000:PROS01448-DFCI.10-448.P31-SM-5CQ5A
prad_p1000:TCGA-EJ-A65D
prad_p1000:TCGA-EJ-5526
prad_p1000:TCGA-EJ-8469
prad_p1000:TCGA-HC-A6AN
prad_p1000:TCGA-HC-7081
prad_p1000:TCGA-HC-7231
prad_p1000:TCGA-QU-A6IN
prad_p1000:TCGA-XK-AAJ3
prad_p1000:24852
prad_p1000:PM10
prad_p1000:TCGA-J9-A8CL
prad_p1000:03-130L_RETROPERITONEAL
prad_p1000:PROS11496-6115288-SM-6CNQ1
prad_p1000:SC_9090
prad_p1000:P02-1562
prad_p1000:TCGA-EJ-A65E
prad_p1000:TCGA-G9-6498
prad_p1000:TCGA-KC-A4BN
prad_p1000:TCGA-V1-A8MU
prad_p1000:TCGA-ZG-A8QY
prad_p1000:SC_9036
prad_p1000:TCGA-EJ-5505
prad_p1000:12-011I7_LN
prad_p1000:MO_1124
prad_p1000:MO_1176
prad_p1000:MO_1215
prad_p1000:MO_1421
prad_p1000:P03-871
prad_p1000:PM159
prad_p1000:PRAD-01115264-SM-6WZFA
prad_p1000:PRAD-6115393.0-SM-7LGUF
prad_p1000:PROS01448-1115183-SM-5SGU3
prad_p1000:PROS01448-6115237-SM-67ERZ
prad_p1000:PROS10448-SUTC.01115088-SM-4JC6Q
prad_p1000:SC_9018
prad_p1000:SC_9019
prad_p1000:TCGA-EJ-7781
prad_p1000:TCGA-HC-7742
prad_p1000:TCGA-KC-A7F6
prad_p1000:TCGA-YL-A8SJ
prad_p1000:TCGA-ZG-A9L0
prad_p1000:TCGA-ZG-A9M4
prad_p1000:10363
prad_p1000:12688
prad_cdk12_mskcc_2020:P-0011377
prad_cdk12_mskcc_2020:P-0021853
prad_cdk12_mskcc_2020:P-0009044
prad_cdk12_mskcc_2020:P-0019580
prad_cdk12_mskcc_2020:P-0009699
prad_cdk12_mskcc_2020:P-0013502
prad_cdk12_mskcc_2020:P-0014598
prad_cdk12_mskcc_2020:P-0015211
prad_cdk12_mskcc_2020:P-0020784
prad_cdk12_mskcc_2020:P-0028071
prad_cdk12_mskcc_2020:P-0034039
prad_cdk12_mskcc_2020:P-0013808
prad_cdk12_mskcc_2020:P-0025793
prad_cdk12_mskcc_2020:P-0021525
prad_cdk12_mskcc_2020:P-0022383
prad_cdk12_mskcc_2020:P-0007343
prad_cdk12_mskcc_2020:P-0010309
prad_cdk12_mskcc_2020:P-0007629
prad_cdk12_mskcc_2020:P-0002740
prad_cdk12_mskcc_2020:P-0006655
prad_cdk12_mskcc_2020:P-0007515
prad_cdk12_mskcc_2020:P-0008771
prad_cdk12_mskcc_2020:P-0012025
prad_cdk12_mskcc_2020:P-0014014
prad_cdk12_mskcc_2020:P-0016248
prad_cdk12_mskcc_2020:P-0018235
prad_cdk12_mskcc_2020:P-0030976
prad_cdk12_mskcc_2020:P-0003101
prad_cdk12_mskcc_2020:P-0023401
prad_cdk12_mskcc_2020:P-0027722
prad_cdk12_mskcc_2020:P-0023741
prad_cdk12_mskcc_2020:P-0014009
prad_cdk12_mskcc_2020:P-0008960
prad_cdk12_mskcc_2020:P-0009402
prad_cdk12_mskcc_2020:P-0014408
prad_cdk12_mskcc_2020:P-0015991
prad_cdk12_mskcc_2020:P-0001884
prad_cdk12_mskcc_2020:P-0017169
prad_cdk12_mskcc_2020:P-0023839
prad_cdk12_mskcc_2020:P-0019624
prad_cdk12_mskcc_2020:P-0007307
prad_cdk12_mskcc_2020:P-0000683
prad_cdk12_mskcc_2020:P-0026072
prad_cdk12_mskcc_2020:P-0019782
prad_cdk12_mskcc_2020:P-0029852
prad_cdk12_mskcc_2020:P-0011090
prad_cdk12_mskcc_2020:P-0005756
prad_cdk12_mskcc_2020:P-0001021
prad_cdk12_mskcc_2020:P-0010746
prad_cdk12_mskcc_2020:P-0021698
prad_cdk12_mskcc_2020:P-0002894
prad_cdk12_mskcc_2020:P-0021596
prad_cdk12_mskcc_2020:P-0003468
prad_cdk12_mskcc_2020:P-0019840
prad_cdk12_mskcc_2020:P-0001768
prad_cdk12_mskcc_2020:P-0003592
prad_cdk12_mskcc_2020:P-0005047
prad_cdk12_mskcc_2020:P-0005787
prad_cdk12_mskcc_2020:P-0008591
prad_cdk12_mskcc_2020:P-0009056
prad_cdk12_mskcc_2020:P-0009818
prad_cdk12_mskcc_2020:P-0010953
prad_cdk12_mskcc_2020:P-0011437
prad_cdk12_mskcc_2020:P-0013372
prad_cdk12_mskcc_2020:P-0016288
prad_cdk12_mskcc_2020:P-0016307
prad_cdk12_mskcc_2020:P-0017944
prad_cdk12_mskcc_2020:P-0018956
prad_cdk12_mskcc_2020:P-0020394
prad_cdk12_mskcc_2020:P-0022611
prad_cdk12_mskcc_2020:P-0025139
prad_cdk12_mskcc_2020:P-0025222
prad_cdk12_mskcc_2020:P-0025571
prad_cdk12_mskcc_2020:P-0027082
prad_cdk12_mskcc_2020:P-0029105
prad_cdk12_mskcc_2020:P-0021928
prad_cdk12_mskcc_2020:P-0019933
prad_cdk12_mskcc_2020:P-0008098
prad_cdk12_mskcc_2020:P-0015345
prad_cdk12_mskcc_2020:P-0000441
prad_cdk12_mskcc_2020:P-0000966
prad_cdk12_mskcc_2020:P-0003945
prad_cdk12_mskcc_2020:P-0004448
prad_cdk12_mskcc_2020:P-0004489
prad_cdk12_mskcc_2020:P-0004704
prad_cdk12_mskcc_2020:P-0005344
prad_cdk12_mskcc_2020:P-0005374
prad_cdk12_mskcc_2020:P-0005428
prad_cdk12_mskcc_2020:P-0007137
prad_cdk12_mskcc_2020:P-0008315
prad_cdk12_mskcc_2020:P-0008339
prad_cdk12_mskcc_2020:P-0011290
prad_cdk12_mskcc_2020:P-0011368
prad_cdk12_mskcc_2020:P-0014566
prad_cdk12_mskcc_2020:P-0014701
prad_cdk12_mskcc_2020:P-0016883
prad_cdk12_mskcc_2020:P-0018315
prad_cdk12_mskcc_2020:P-0018605
prad_cdk12_mskcc_2020:P-0020792
prad_cdk12_mskcc_2020:P-0021561
prad_cdk12_mskcc_2020:P-0023170
prad_cdk12_mskcc_2020:P-0024538
prad_cdk12_mskcc_2020:P-0027210
prad_cdk12_mskcc_2020:P-0030625
prad_cdk12_mskcc_2020:P-0031808
prad_cdk12_mskcc_2020:P-0032212
prad_cdk12_mskcc_2020:P-0018117
prad_cdk12_mskcc_2020:P-0014076
prad_cdk12_mskcc_2020:P-0001297
prad_cdk12_mskcc_2020:P-0008655
prad_cdk12_mskcc_2020:P-0022179
prad_cdk12_mskcc_2020:P-0027593
prad_cdk12_mskcc_2020:P-0017097
prad_cdk12_mskcc_2020:P-0032868
prad_cdk12_mskcc_2020:P-0009399
prad_cdk12_mskcc_2020:P-0006994
prad_cdk12_mskcc_2020:P-0003597
prad_cdk12_mskcc_2020:P-0025138
prad_cdk12_mskcc_2020:P-0014299
prad_cdk12_mskcc_2020:P-0001128
prad_cdk12_mskcc_2020:P-0028102
prad_cdk12_mskcc_2020:P-0030801
prad_cdk12_mskcc_2020:P-0009904
prad_cdk12_mskcc_2020:P-0016941
prad_cdk12_mskcc_2020:P-0010752
prad_cdk12_mskcc_2020:P-0022249
prad_cdk12_mskcc_2020:P-0023605
prad_cdk12_mskcc_2020:P-0008920
prad_cdk12_mskcc_2020:P-0006029
prad_cdk12_mskcc_2020:P-0006057
prad_cdk12_mskcc_2020:P-0007874
prad_cdk12_mskcc_2020:P-0009352
prad_cdk12_mskcc_2020:P-0013115
prad_cdk12_mskcc_2020:P-0017892
prad_cdk12_mskcc_2020:P-0024898
prad_cdk12_mskcc_2020:P-0027245
prad_cdk12_mskcc_2020:P-0031771
prad_cdk12_mskcc_2020:P-0002206
prad_cdk12_mskcc_2020:P-0003400
prad_cdk12_mskcc_2020:P-0004539
prad_cdk12_mskcc_2020:P-0005867
prad_cdk12_mskcc_2020:P-0012711
prad_cdk12_mskcc_2020:P-0012741
prad_cdk12_mskcc_2020:P-0015064
prad_cdk12_mskcc_2020:P-0015278
prad_cdk12_mskcc_2020:P-0015850
prad_cdk12_mskcc_2020:P-0017940
prad_cdk12_mskcc_2020:P-0021271
prad_cdk12_mskcc_2020:P-0022904
prad_cdk12_mskcc_2020:P-0025880
prad_cdk12_mskcc_2020:P-0026152
prad_cdk12_mskcc_2020:P-0027454
prad_cdk12_mskcc_2020:P-0027526
prad_cdk12_mskcc_2020:P-0030261
prad_cdk12_mskcc_2020:P-0001141
prad_cdk12_mskcc_2020:P-0011483
prad_cdk12_mskcc_2020:P-0023866
prad_cdk12_mskcc_2020:P-0028306
prad_cdk12_mskcc_2020:P-0030640
prad_cdk12_mskcc_2020:P-0005976
prad_cdk12_mskcc_2020:P-0031720
prad_cdk12_mskcc_2020:P-0005697
prad_cdk12_mskcc_2020:P-0023345
prad_cdk12_mskcc_2020:P-0002499
prad_cdk12_mskcc_2020:P-0002898
prad_cdk12_mskcc_2020:P-0009090
prad_cdk12_mskcc_2020:P-0012543
prad_cdk12_mskcc_2020:P-0013022
prad_cdk12_mskcc_2020:P-0017889
prad_cdk12_mskcc_2020:P-0019520
prad_cdk12_mskcc_2020:P-0020218
prad_cdk12_mskcc_2020:P-0021854
prad_cdk12_mskcc_2020:P-0031426
prad_cdk12_mskcc_2020:P-0018659
prad_cdk12_mskcc_2020:P-0021310
prad_cdk12_mskcc_2020:P-0011465
prad_cdk12_mskcc_2020:P-0032646
prad_cdk12_mskcc_2020:P-0001242
prad_cdk12_mskcc_2020:P-0001697
prad_cdk12_mskcc_2020:P-0002840
prad_cdk12_mskcc_2020:P-0002880
prad_cdk12_mskcc_2020:P-0003033
prad_cdk12_mskcc_2020:P-0003052
prad_cdk12_mskcc_2020:P-0003442
prad_cdk12_mskcc_2020:P-0003535
prad_cdk12_mskcc_2020:P-0004285
prad_cdk12_mskcc_2020:P-0004597
prad_cdk12_mskcc_2020:P-0005436
prad_cdk12_mskcc_2020:P-0005535
prad_cdk12_mskcc_2020:P-0005546
prad_cdk12_mskcc_2020:P-0005571
prad_cdk12_mskcc_2020:P-0006247
prad_cdk12_mskcc_2020:P-0006635
prad_cdk12_mskcc_2020:P-0006749
prad_cdk12_mskcc_2020:P-0007267
prad_cdk12_mskcc_2020:P-0007313
prad_cdk12_mskcc_2020:P-0007332
prad_cdk12_mskcc_2020:P-0007734
prad_cdk12_mskcc_2020:P-0007877
prad_cdk12_mskcc_2020:P-0008383
prad_cdk12_mskcc_2020:P-0008812
prad_cdk12_mskcc_2020:P-0008858
prad_cdk12_mskcc_2020:P-0009448
prad_cdk12_mskcc_2020:P-0010523
prad_cdk12_mskcc_2020:P-0011577
prad_cdk12_mskcc_2020:P-0012109
prad_cdk12_mskcc_2020:P-0012929
prad_cdk12_mskcc_2020:P-0013037
prad_cdk12_mskcc_2020:P-0013526
prad_cdk12_mskcc_2020:P-0013733
prad_cdk12_mskcc_2020:P-0014991
prad_cdk12_mskcc_2020:P-0015452
prad_cdk12_mskcc_2020:P-0015552
prad_cdk12_mskcc_2020:P-0016134
prad_cdk12_mskcc_2020:P-0016236
prad_cdk12_mskcc_2020:P-0016490
prad_cdk12_mskcc_2020:P-0016930
prad_cdk12_mskcc_2020:P-0017287
prad_cdk12_mskcc_2020:P-0017376
prad_cdk12_mskcc_2020:P-0017686
prad_cdk12_mskcc_2020:P-0018812
prad_cdk12_mskcc_2020:P-0020132
prad_cdk12_mskcc_2020:P-0020812
prad_cdk12_mskcc_2020:P-0021240
prad_cdk12_mskcc_2020:P-0021547
prad_cdk12_mskcc_2020:P-0021711
prad_cdk12_mskcc_2020:P-0021782
prad_cdk12_mskcc_2020:P-0022060
prad_cdk12_mskcc_2020:P-0022430
prad_cdk12_mskcc_2020:P-0022470
prad_cdk12_mskcc_2020:P-0022865
prad_cdk12_mskcc_2020:P-0023594
prad_cdk12_mskcc_2020:P-0024097
prad_cdk12_mskcc_2020:P-0024220
prad_cdk12_mskcc_2020:P-0027823
prad_cdk12_mskcc_2020:P-0028090
prad_cdk12_mskcc_2020:P-0028775
prad_cdk12_mskcc_2020:P-0031812
prad_cdk12_mskcc_2020:P-0033114
prad_pik3r1_msk_2021:P-0052869
prad_pik3r1_msk_2021:P-0011377
prad_pik3r1_msk_2021:P-0046881
prad_pik3r1_msk_2021:P-0022557
prad_pik3r1_msk_2021:P-0021853
prad_pik3r1_msk_2021:P-0040786
prad_pik3r1_msk_2021:P-0009044
prad_pik3r1_msk_2021:P-0019580
prad_pik3r1_msk_2021:P-0012104
prad_pik3r1_msk_2021:P-0013502
prad_pik3r1_msk_2021:P-0014598
prad_pik3r1_msk_2021:P-0015211
prad_pik3r1_msk_2021:P-0020784
prad_pik3r1_msk_2021:P-0034277
prad_pik3r1_msk_2021:P-0047234
prad_pik3r1_msk_2021:P-0052243
prad_pik3r1_msk_2021:P-0054445
prad_pik3r1_msk_2021:P-0025793
prad_pik3r1_msk_2021:P-0010309
prad_pik3r1_msk_2021:P-0002740
prad_pik3r1_msk_2021:P-0056943
prad_pik3r1_msk_2021:P-0054692
prad_pik3r1_msk_2021:P-0007629
prad_pik3r1_msk_2021:P-0007515
prad_pik3r1_msk_2021:P-0008771
prad_pik3r1_msk_2021:P-0012025
prad_pik3r1_msk_2021:P-0016248
prad_pik3r1_msk_2021:P-0024459
prad_pik3r1_msk_2021:P-0030976
prad_pik3r1_msk_2021:P-0027722
prad_pik3r1_msk_2021:P-0023741
prad_pik3r1_msk_2021:P-0009402
prad_pik3r1_msk_2021:P-0014408
prad_pik3r1_msk_2021:P-0015991
prad_pik3r1_msk_2021:P-0031856
prad_pik3r1_msk_2021:P-0042035
prad_pik3r1_msk_2021:P-0047316
prad_pik3r1_msk_2021:P-0031189
prad_pik3r1_msk_2021:P-0001884
prad_pik3r1_msk_2021:P-0019624
prad_pik3r1_msk_2021:P-0047806
prad_pik3r1_msk_2021:P-0050086
prad_pik3r1_msk_2021:P-0029852
prad_pik3r1_msk_2021:P-0011090
prad_pik3r1_msk_2021:P-0005756
prad_pik3r1_msk_2021:P-0001021
prad_pik3r1_msk_2021:P-0010746
prad_pik3r1_msk_2021:P-0021698
prad_pik3r1_msk_2021:P-0040003
prad_pik3r1_msk_2021:P-0050553
prad_pik3r1_msk_2021:P-0052538
prad_pik3r1_msk_2021:P-0035270
prad_pik3r1_msk_2021:P-0019840
prad_pik3r1_msk_2021:P-0036176
prad_pik3r1_msk_2021:P-0005787
prad_pik3r1_msk_2021:P-0003468
prad_pik3r1_msk_2021:P-0005047
prad_pik3r1_msk_2021:P-0008591
prad_pik3r1_msk_2021:P-0009679
prad_pik3r1_msk_2021:P-0016288
prad_pik3r1_msk_2021:P-0016307
prad_pik3r1_msk_2021:P-0018956
prad_pik3r1_msk_2021:P-0020394
prad_pik3r1_msk_2021:P-0022611
prad_pik3r1_msk_2021:P-0025139
prad_pik3r1_msk_2021:P-0025571
prad_pik3r1_msk_2021:P-0029105
prad_pik3r1_msk_2021:P-0035472
prad_pik3r1_msk_2021:P-0041549
prad_pik3r1_msk_2021:P-0048980
prad_pik3r1_msk_2021:P-0054214
prad_pik3r1_msk_2021:P-0003101
prad_pik3r1_msk_2021:P-0050289
prad_pik3r1_msk_2021:P-0008098
prad_pik3r1_msk_2021:P-0015345
prad_pik3r1_msk_2021:P-0055684
prad_pik3r1_msk_2021:P-0000441
prad_pik3r1_msk_2021:P-0004448
prad_pik3r1_msk_2021:P-0004489
prad_pik3r1_msk_2021:P-0004704
prad_pik3r1_msk_2021:P-0005344
prad_pik3r1_msk_2021:P-0005428
prad_pik3r1_msk_2021:P-0008315
prad_pik3r1_msk_2021:P-0011290
prad_pik3r1_msk_2021:P-0011368
prad_pik3r1_msk_2021:P-0014566
prad_pik3r1_msk_2021:P-0014701
prad_pik3r1_msk_2021:P-0016883
prad_pik3r1_msk_2021:P-0018605
prad_pik3r1_msk_2021:P-0019933
prad_pik3r1_msk_2021:P-0020792
prad_pik3r1_msk_2021:P-0021928
prad_pik3r1_msk_2021:P-0023170
prad_pik3r1_msk_2021:P-0024538
prad_pik3r1_msk_2021:P-0027210
prad_pik3r1_msk_2021:P-0030625
prad_pik3r1_msk_2021:P-0032212
prad_pik3r1_msk_2021:P-0039234
prad_pik3r1_msk_2021:P-0041059
prad_pik3r1_msk_2021:P-0044808
prad_pik3r1_msk_2021:P-0050888
prad_pik3r1_msk_2021:P-0018117
prad_pik3r1_msk_2021:P-0014076
prad_pik3r1_msk_2021:P-0001297
prad_pik3r1_msk_2021:P-0008655
prad_pik3r1_msk_2021:P-0042174
prad_pik3r1_msk_2021:P-0017097
prad_pik3r1_msk_2021:P-0032868
prad_pik3r1_msk_2021:P-0049590
prad_pik3r1_msk_2021:P-0009399
prad_pik3r1_msk_2021:P-0006994
prad_pik3r1_msk_2021:P-0003597
prad_pik3r1_msk_2021:P-0057414
prad_pik3r1_msk_2021:P-0055465
prad_pik3r1_msk_2021:P-0001128
prad_pik3r1_msk_2021:P-0016941
prad_pik3r1_msk_2021:P-0038415
prad_pik3r1_msk_2021:P-0056951
prad_pik3r1_msk_2021:P-0030645
prad_pik3r1_msk_2021:P-0039446
prad_pik3r1_msk_2021:P-0031599
prad_pik3r1_msk_2021:P-0048047
prad_pik3r1_msk_2021:P-0034472
prad_pik3r1_msk_2021:P-0009352
prad_pik3r1_msk_2021:P-0017892
prad_pik3r1_msk_2021:P-0024898
prad_pik3r1_msk_2021:P-0027245
prad_pik3r1_msk_2021:P-0030872
prad_pik3r1_msk_2021:P-0031579
prad_pik3r1_msk_2021:P-0036349
prad_pik3r1_msk_2021:P-0054652
prad_pik3r1_msk_2021:P-0002206
prad_pik3r1_msk_2021:P-0003400
prad_pik3r1_msk_2021:P-0004539
prad_pik3r1_msk_2021:P-0005867
prad_pik3r1_msk_2021:P-0012711
prad_pik3r1_msk_2021:P-0012741
prad_pik3r1_msk_2021:P-0015064
prad_pik3r1_msk_2021:P-0015850
prad_pik3r1_msk_2021:P-0021271
prad_pik3r1_msk_2021:P-0022904
prad_pik3r1_msk_2021:P-0025880
prad_pik3r1_msk_2021:P-0026152
prad_pik3r1_msk_2021:P-0027454
prad_pik3r1_msk_2021:P-0027526
prad_pik3r1_msk_2021:P-0033465
prad_pik3r1_msk_2021:P-0037620
prad_pik3r1_msk_2021:P-0038299
prad_pik3r1_msk_2021:P-0040081
prad_pik3r1_msk_2021:P-0040801
prad_pik3r1_msk_2021:P-0041027
prad_pik3r1_msk_2021:P-0041838
prad_pik3r1_msk_2021:P-0042135
prad_pik3r1_msk_2021:P-0042177
prad_pik3r1_msk_2021:P-0053403
prad_pik3r1_msk_2021:P-0055138
prad_pik3r1_msk_2021:P-0030812
prad_pik3r1_msk_2021:P-0001141
prad_pik3r1_msk_2021:P-0011483
prad_pik3r1_msk_2021:P-0023866
prad_pik3r1_msk_2021:P-0028306
prad_pik3r1_msk_2021:P-0045291
prad_pik3r1_msk_2021:P-0005976
prad_pik3r1_msk_2021:P-0031720
prad_pik3r1_msk_2021:P-0005697
prad_pik3r1_msk_2021:P-0023345
prad_pik3r1_msk_2021:P-0012543
prad_pik3r1_msk_2021:P-0019520
prad_pik3r1_msk_2021:P-0020218
prad_pik3r1_msk_2021:P-0030202
prad_pik3r1_msk_2021:P-0031426
prad_pik3r1_msk_2021:P-0037021
prad_pik3r1_msk_2021:P-0021310
prad_pik3r1_msk_2021:P-0011465
prad_pik3r1_msk_2021:P-0034645
prad_pik3r1_msk_2021:P-0049287
prad_pik3r1_msk_2021:P-0032646
prad_pik3r1_msk_2021:P-0001242
prad_pik3r1_msk_2021:P-0001697
prad_pik3r1_msk_2021:P-0001768
prad_pik3r1_msk_2021:P-0003033
prad_pik3r1_msk_2021:P-0003052
prad_pik3r1_msk_2021:P-0003442
prad_pik3r1_msk_2021:P-0004285
prad_pik3r1_msk_2021:P-0004597
prad_pik3r1_msk_2021:P-0005535
prad_pik3r1_msk_2021:P-0006635
prad_pik3r1_msk_2021:P-0006749
prad_pik3r1_msk_2021:P-0007267
prad_pik3r1_msk_2021:P-0007313
prad_pik3r1_msk_2021:P-0007877
prad_pik3r1_msk_2021:P-0008812
prad_pik3r1_msk_2021:P-0010523
prad_pik3r1_msk_2021:P-0011577
prad_pik3r1_msk_2021:P-0012109
prad_pik3r1_msk_2021:P-0012929
prad_pik3r1_msk_2021:P-0013037
prad_pik3r1_msk_2021:P-0016134
prad_pik3r1_msk_2021:P-0016930
prad_pik3r1_msk_2021:P-0017287
prad_pik3r1_msk_2021:P-0017376
prad_pik3r1_msk_2021:P-0017686
prad_pik3r1_msk_2021:P-0020132
prad_pik3r1_msk_2021:P-0020812
prad_pik3r1_msk_2021:P-0021240
prad_pik3r1_msk_2021:P-0021547
prad_pik3r1_msk_2021:P-0021782
prad_pik3r1_msk_2021:P-0022060
prad_pik3r1_msk_2021:P-0022430
prad_pik3r1_msk_2021:P-0022865
prad_pik3r1_msk_2021:P-0023401
prad_pik3r1_msk_2021:P-0023594
prad_pik3r1_msk_2021:P-0024097
prad_pik3r1_msk_2021:P-0024220
prad_pik3r1_msk_2021:P-0025222
prad_pik3r1_msk_2021:P-0027823
prad_pik3r1_msk_2021:P-0028090
prad_pik3r1_msk_2021:P-0033832
prad_pik3r1_msk_2021:P-0034278
prad_pik3r1_msk_2021:P-0035107
prad_pik3r1_msk_2021:P-0035807
prad_pik3r1_msk_2021:P-0035854
prad_pik3r1_msk_2021:P-0036352
prad_pik3r1_msk_2021:P-0036804
prad_pik3r1_msk_2021:P-0037126
prad_pik3r1_msk_2021:P-0037691
prad_pik3r1_msk_2021:P-0041944
prad_pik3r1_msk_2021:P-0043581
prad_pik3r1_msk_2021:P-0044793
prad_pik3r1_msk_2021:P-0045238
prad_pik3r1_msk_2021:P-0047574
prad_pik3r1_msk_2021:P-0048085
prad_pik3r1_msk_2021:P-0048500
prad_pik3r1_msk_2021:P-0051756
prad_pik3r1_msk_2021:P-0051910
prad_pik3r1_msk_2021:P-0052272
prad_pik3r1_msk_2021:P-0053392
prad_pik3r1_msk_2021:P-0053926
prad_pik3r1_msk_2021:P-0053950
prad_pik3r1_msk_2021:P-0054023
prad_pik3r1_msk_2021:P-0054566
prad_pik3r1_msk_2021:P-0055662
prad_pik3r1_msk_2021:P-0055770
prad_su2c_2019:5115505
prad_su2c_2019:96115642
prad_su2c_2019:5115290
prad_su2c_2019:96115145
prad_su2c_2019:96115275
prad_su2c_2019:96115624
prad_su2c_2019:1115161
prad_su2c_2019:1115083
prad_su2c_2019:96115622
prad_su2c_2019:96115294
prad_su2c_2019:97115449
prad_su2c_2019:5115547
prad_su2c_2019:9115059
prad_su2c_2019:13115443
prad_su2c_2019:9115541
prad_su2c_2019:9115046
prad_su2c_2019:9115522
prad_su2c_2019:5115186
prad_su2c_2019:6115320
prad_su2c_2019:5115612
prad_su2c_2019:5115130
prad_su2c_2019:6115250
prad_su2c_2019:13115465
prad_su2c_2019:5115197
prad_su2c_2019:9115102
prad_su2c_2019:9115422
prad_su2c_2019:9115418
prad_su2c_2019:6115014
prad_su2c_2019:96115645
prad_su2c_2019:5115411
prad_su2c_2019:9115572
prad_su2c_2019:6115115
prad_su2c_2019:96115626
prad_su2c_2019:9115109
prad_su2c_2019:9115063
prad_su2c_2019:9115538
prad_su2c_2019:9115068
prad_su2c_2019:6115395
prad_su2c_2019:5115160
prad_su2c_2019:5115152
prad_su2c_2019:6115393
prad_su2c_2019:6115590
prad_su2c_2019:5115076
prad_su2c_2019:97115316
prad_su2c_2019:9115324
prad_su2c_2019:9115340
prad_su2c_2019:96115215
prad_su2c_2019:1115154
prad_su2c_2019:6115403
prad_su2c_2019:96115204
prad_su2c_2019:96115475
prad_su2c_2019:96115508
prad_su2c_2019:6115383
prad_su2c_2019:6115389
prad_su2c_2019:96115138
prad_su2c_2019:96115619
prad_su2c_2019:9115174
prad_su2c_2019:9115425
prad_su2c_2019:1115093
prad_su2c_2019:5115261
prad_su2c_2019:5115127
prad_su2c_2019:9115108
prad_su2c_2019:9115180
prad_su2c_2019:96115474
prad_su2c_2019:5115030
prad_su2c_2019:6115401
prad_su2c_2019:5115194
prad_su2c_2019:97115166
prad_su2c_2019:97115375
prad_su2c_2019:5115259
prad_su2c_2019:5115611
prad_su2c_2019:5115128
prad_su2c_2019:5115405
prad_su2c_2019:97115001
prad_su2c_2019:97115131
prad_su2c_2019:9115049
prad_su2c_2019:9115185
prad_su2c_2019:5115255
prad_su2c_2019:97115151
prad_su2c_2019:9115171
prad_su2c_2019:9115338
prad_su2c_2019:9115416
prad_su2c_2019:97115337
prad_su2c_2019:97115363
prad_su2c_2019:5115198
prad_su2c_2019:5115528
prad_su2c_2019:9115420
prad_su2c_2019:9115568
prad_su2c_2019:97115071
prad_su2c_2019:97115167
prad_su2c_2019:97115188
prad_su2c_2019:97115278
prad_su2c_2019:97115447
prad_su2c_2019:97115564
prad_su2c_2019:5115327
prad_su2c_2019:97115280
prad_su2c_2019:6115319
prad_su2c_2019:6115597
prad_su2c_2019:96115140
prad_su2c_2019:6115288
prad_su2c_2019:9115048
prad_su2c_2019:96115476
prad_su2c_2019:6115391
prad_su2c_2019:1115466
prad_su2c_2019:6115394
prad_su2c_2019:6115398
prad_su2c_2019:6115400
prad_su2c_2019:6115596
prad_su2c_2019:13115262
prad_su2c_2019:96115141
prad_su2c_2019:96115214
prad_su2c_2019:1115244
prad_su2c_2019:1115362
prad_su2c_2019:1115468
prad_su2c_2019:6115117
prad_su2c_2019:9115042
prad_su2c_2019:1115087
prad_su2c_2019:6115321
prad_su2c_2019:1115527
prad_su2c_2019:1115549
prad_su2c_2019:5115077
prad_su2c_2019:5115256
prad_su2c_2019:5115548
prad_su2c_2019:6115227
prad_su2c_2019:6115236
prad_su2c_2019:6115594
prad_su2c_2019:6115598
prad_su2c_2019:96115207
prad_su2c_2019:96115472
prad_su2c_2019:96115616
prad_su2c_2019:97115456
prad_su2c_2019:5115199
prad_su2c_2019:97115003
prad_su2c_2019:5115029
prad_su2c_2019:5115407
prad_su2c_2019:97115095
prad_su2c_2019:5115032
prad_su2c_2019:1115309
prad_su2c_2019:96115143
prad_su2c_2019:6115237
prad_su2c_2019:9115575
prad_su2c_2019:6115381
prad_su2c_2019:1115183
prad_su2c_2019:1115264
prad_su2c_2019:5115058
prad_su2c_2019:5115158
prad_su2c_2019:5115651
prad_su2c_2019:9115045
prad_su2c_2019:9115069
prad_mcspc_mskcc_2020:P-0011377
prad_mcspc_mskcc_2020:P-0001774
prad_mcspc_mskcc_2020:P-0009044
prad_mcspc_mskcc_2020:P-0029645
prad_mcspc_mskcc_2020:P-0012230
prad_mcspc_mskcc_2020:P-0014598
prad_mcspc_mskcc_2020:P-0015211
prad_mcspc_mskcc_2020:P-0020784
prad_mcspc_mskcc_2020:P-0021525
prad_mcspc_mskcc_2020:P-0022383
prad_mcspc_mskcc_2020:P-0007629
prad_mcspc_mskcc_2020:P-0010034
prad_mcspc_mskcc_2020:P-0008771
prad_mcspc_mskcc_2020:P-0019624
prad_mcspc_mskcc_2020:P-0000683
prad_mcspc_mskcc_2020:P-0008098
prad_mcspc_mskcc_2020:P-0020792
prad_mcspc_mskcc_2020:P-0014076
prad_mcspc_mskcc_2020:P-0012928
prad_mcspc_mskcc_2020:P-0017097
prad_mcspc_mskcc_2020:P-0009399
prad_mcspc_mskcc_2020:P-0025138
prad_mcspc_mskcc_2020:P-0014299
prad_mcspc_mskcc_2020:P-0001128
prad_mcspc_mskcc_2020:P-0030801
prad_mcspc_mskcc_2020:P-0010752
prad_mcspc_mskcc_2020:P-0008920
prad_mcspc_mskcc_2020:P-0006029
prad_mcspc_mskcc_2020:P-0029164
prad_mcspc_mskcc_2020:P-0006057
prad_mcspc_mskcc_2020:P-0013115
prad_mcspc_mskcc_2020:P-0017892
prad_mcspc_mskcc_2020:P-0024898
prad_mcspc_mskcc_2020:P-0027245
prad_mcspc_mskcc_2020:P-0031771
prad_mcspc_mskcc_2020:P-0012711
prad_mcspc_mskcc_2020:P-0015064
prad_mcspc_mskcc_2020:P-0015278
prad_mcspc_mskcc_2020:P-0030261
prad_mcspc_mskcc_2020:P-0001141
prad_mcspc_mskcc_2020:P-0011483
prad_mcspc_mskcc_2020:P-0023866
prad_mcspc_mskcc_2020:P-0028306
prad_mcspc_mskcc_2020:P-0020812
prad_mcspc_mskcc_2020:P-0031720
prad_mcspc_mskcc_2020:P-0002499
prad_mcspc_mskcc_2020:P-0002898
prad_mcspc_mskcc_2020:P-0003061
prad_mcspc_mskcc_2020:P-0020218
prad_mcspc_mskcc_2020:P-0031426
prad_mcspc_mskcc_2020:P-0011465
prad_mcspc_mskcc_2020:P-0001242
prad_mcspc_mskcc_2020:P-0001768
prad_mcspc_mskcc_2020:P-0003033
prad_mcspc_mskcc_2020:P-0004285
prad_mcspc_mskcc_2020:P-0004597
prad_mcspc_mskcc_2020:P-0005436
prad_mcspc_mskcc_2020:P-0005535
prad_mcspc_mskcc_2020:P-0005571
prad_mcspc_mskcc_2020:P-0007267
prad_mcspc_mskcc_2020:P-0007313
prad_mcspc_mskcc_2020:P-0007332
prad_mcspc_mskcc_2020:P-0007734
prad_mcspc_mskcc_2020:P-0008383
prad_mcspc_mskcc_2020:P-0008812
prad_mcspc_mskcc_2020:P-0009448
prad_mcspc_mskcc_2020:P-0011577
prad_mcspc_mskcc_2020:P-0013526
prad_mcspc_mskcc_2020:P-0015452
prad_mcspc_mskcc_2020:P-0018812
prad_mcspc_mskcc_2020:P-0021711
prad_mcspc_mskcc_2020:P-0023401
prad_mcspc_mskcc_2020:P-0025222
prad_mcspc_mskcc_2020:P-0027823
prad_mskcc_2017:P-0004593
prad_mskcc_2017:P-0002304
prad_mskcc_2017:P-0006840
prad_mskcc_2017:P-0005768
prad_mskcc_2017:P-0005806
prad_mskcc_2017:P-0005064
prad_mskcc_2017:P-0008682
prad_mskcc_2017:P-0006378
prad_mskcc_2017:P-0004892
prad_mskcc_2017:P-0000449
prad_mskcc_2017:P-0000140
prad_mskcc_2017:P-0000888
prad_mskcc_2017:P-0003541
prad_mskcc_2017:P-0001274
prad_mskcc_2017:P-0002149
prad_mskcc_2017:P-0006994
prad_mskcc_2017:P-0008966
prad_mskcc_2017:P-0000610
prad_mskcc_2017:P-0000935
prad_mskcc_2017:P-0001108
prad_mskcc_2017:P-0001698
prad_mskcc_2017:P-0002123
prad_mskcc_2017:P-0005454
prad_mskcc_2017:P-0006856
prad_mskcc_2017:P-0007749
prad_mskcc_2017:P-0008074
prad_mskcc_2017:P-0008206
prad_mskcc_2017:P-0000318
prad_mskcc_2017:P-0000640
prad_mskcc_2017:P-0000828
prad_mskcc_2017:P-0000966
prad_mskcc_2017:P-0001141
prad_mskcc_2017:P-0002364
prad_mskcc_2017:P-0002382
prad_mskcc_2017:P-0002901
prad_mskcc_2017:P-0002961
prad_mskcc_2017:P-0002974
prad_mskcc_2017:P-0002990
prad_mskcc_2017:P-0002999
prad_mskcc_2017:P-0003040
prad_mskcc_2017:P-0003226
prad_mskcc_2017:P-0003419
prad_mskcc_2017:P-0003626
prad_mskcc_2017:P-0003758
prad_mskcc_2017:P-0004482
prad_mskcc_2017:P-0004826
prad_mskcc_2017:P-0005045
prad_mskcc_2017:P-0005596
prad_mskcc_2017:P-0006389
prad_mskcc_2017:P-0006670
prad_mskcc_2017:P-0007098
prad_mskcc_2017:P-0007547
prad_mskcc_2017:P-0008452
prad_mskcc_2017:P-0008852
prad_mskcc_2017:P-0008960
prad_mskcc_2017:P-0003052
prad_mskcc_2017:P-0003101
prad_mskcc_2017:P-0008461
prad_mskcc_2017:P-0001242
prad_mskcc_2017:P-0001697
prad_mskcc_2017:P-0001768
prad_mskcc_2017:P-0002840
prad_mskcc_2017:P-0002880
prad_mskcc_2017:P-0002894
prad_mskcc_2017:P-0003442
prad_mskcc_2017:P-0003450
prad_mskcc_2017:P-0003592
prad_mskcc_2017:P-0004285
prad_mskcc_2017:P-0004597
prad_mskcc_2017:P-0005047
prad_mskcc_2017:P-0005216
prad_mskcc_2017:P-0005546
prad_mskcc_2017:P-0005571
prad_mskcc_2017:P-0005787
prad_mskcc_2017:P-0006247
prad_mskcc_2017:P-0006749
prad_mskcc_2017:P-0007267
prad_mskcc_2017:P-0007307
prad_mskcc_2017:P-0007313
prad_mskcc_2017:P-0007332
prad_mskcc_2017:P-0007343
prad_mskcc_2017:P-0007734
prad_mskcc_2017:P-0007877
prad_mskcc_2017:P-0007900
prad_mskcc_2017:P-0008048
prad_mskcc_2017:P-0008383
prad_mskcc_2017:P-0008591
prad_mskcc_2017:P-0008812
prad_mskcc_2017:P-0008858
prad_mskcc_2017:P-0009056
prad_mskcc:PCA0084
prad_mskcc:PCA0144
prad_mskcc:PCA0028
prad_mskcc:PCA0013
prad_mskcc:PCA0030
prad_mskcc:PCA0063
prad_mskcc:PCA0086
prad_mskcc:PCA0095
prad_mskcc:PCA0147
prad_mskcc:PCA0160
prad_mskcc:PCA0182
prad_mskcc:PCA0215
prad_mskcc:PCA0187
prad_mskcc:PCA0024
prad_mskcc:PCA0083
prad_mskcc:PCA0124
prad_mskcc:PCA0129
prad_mskcc:PCA0104
prad_mskcc:PCA0141
prad_mskcc:PCA0018
prad_mskcc:PCA0134
prad_mskcc:PCA0135
prad_mskcc:PCA0146
prad_mskcc:PCA0168
prad_mskcc:PCA0056
prad_mskcc:PCA0015
prad_mskcc:PCA0188
prad_mskcc:PCA0092
prad_mskcc:PCA0210
prad_mskcc:PCA0190
prad_mskcc:PCA0193
prad_mskcc:PCA0032
prad_mskcc:PCA0038
prad_mskcc:PCA0107
prad_mskcc:PCA0184
prad_mskcc:PCA0004
prad_mskcc:PCA0197
prad_mskcc:PCA0034
prad_mskcc:PCA0035
prad_mskcc:PCA0064
prad_mskcc:PCA0066
prad_mskcc:PCA0093
prad_mskcc:PCA0096
prad_mskcc:PCA0118
prad_mskcc:PCA0119
prad_mskcc:PCA0156
prad_mskcc:PCA0161
prostate_dkfz_2018:ICGC_PCA176
prostate_dkfz_2018:ICGC_PCA192
prostate_dkfz_2018:ICGC_PCA033
prostate_dkfz_2018:ICGC_PCA030
prostate_dkfz_2018:ICGC_PCA091
prostate_dkfz_2018:ICGC_PCAL14
prostate_dkfz_2018:CPCG0072
prostate_dkfz_2018:ICGC_PCAL43
prostate_dkfz_2018:ICGC_PCA035
prostate_dkfz_2018:ICGC_PCA084
prostate_dkfz_2018:ICGC_PCA001
prostate_dkfz_2018:ICGC_PCA059
prostate_dkfz_2018:CPCG0075
prostate_dkfz_2018:CPCG0364
prostate_dkfz_2018:ICGC_PCAL27
prostate_dkfz_2018:ICGC_PCA105
nepc_wcm_2016:WCMC89
nepc_wcm_2016:WCMC119
nepc_wcm_2016:WCMC21010
nepc_wcm_2016:WCMC7520
nepc_wcm_2016:WCMC9
nepc_wcm_2016:WCMC90
nepc_wcm_2016:WCMC183
nepc_wcm_2016:WCMC185
nepc_wcm_2016:WCMC11040
nepc_wcm_2016:WCMC1
nepc_wcm_2016:WCMC79
nepc_wcm_2016:WCMC124
nepc_wcm_2016:WCMC195
nepc_wcm_2016:WCMC21014
nepc_wcm_2016:WCMC26731
nepc_wcm_2016:WCMC15
nepc_wcm_2016:WCMC198
nepc_wcm_2016:WCMC10363
nepc_wcm_2016:WCMC12688

## Sheet: PC-3
1 alteration the same	2-4 alterations the same	5-6 alterations the same
prad_tcga:TCGA-XK-AAIR	prad_tcga:TCGA-EJ-A7NM	prad_su2c_2019:prad_tcga:TCGA-EJ-A7NM
prad_tcga:TCGA-XJ-A9DX	prad_tcga:TCGA-HC-8265
prad_tcga:TCGA-CH-5740	prad_tcga:TCGA-ZG-A9L0
prad_tcga:TCGA-HC-8264	prad_tcga:TCGA-EJ-5524
prad_tcga:TCGA-YL-A8S8	prad_tcga:TCGA-ZG-A9N3
prad_tcga:TCGA-TP-A8TT	prad_tcga:TCGA-KK-A7B0
prad_tcga:TCGA-CH-5753	prad_tcga:TCGA-FC-7961
prad_tcga:TCGA-FC-A4JI	prad_tcga:TCGA-HC-A9TE
prad_tcga:TCGA-VN-A88N	prad_tcga:TCGA-EJ-7315
prad_tcga:TCGA-FC-A6HD	prad_tcga:TCGA-G9-6363
prad_tcga:TCGA-ZG-A9M4	prad_tcga:TCGA-KK-A7AQ
prad_tcga:TCGA-EJ-A65D	prad_tcga:TCGA-J9-A8CM
prad_tcga:TCGA-CH-5737	prad_tcga:TCGA-ZG-A8QZ
prad_tcga:TCGA-G9-7525	prad_tcga:TCGA-J4-A67N
prad_tcga:TCGA-KK-A7AZ	prad_tcga:TCGA-EJ-A46F
prad_tcga:TCGA-YL-A8SL	prad_tcga:TCGA-KK-A7AW
prad_tcga:TCGA-HC-7744	prad_tcga:TCGA-KK-A8IA
prad_tcga:TCGA-XQ-A8TA	prad_tcga:TCGA-KK-A7B4
prad_tcga:TCGA-YL-A8HJ	prad_tcga:TCGA-HC-7742
prad_tcga:TCGA-KC-A7F3	prad_tcga:TCGA-EJ-5507
prad_tcga:TCGA-M7-A721	prad_tcga:TCGA-G9-6373
prad_tcga:TCGA-KK-A7B2	prad_tcga:TCGA-EJ-8469
prad_tcga:TCGA-HC-7081	prad_tcga:TCGA-KK-A59Y
prad_tcga:TCGA-V1-A9ZG	prad_tcga:TCGA-G9-6361
prad_tcga:TCGA-ZG-A9L4	prad_tcga:TCGA-J4-AATZ
prad_tcga:TCGA-FC-7708	prad_tcga:TCGA-YL-A9WY
prad_tcga:TCGA-HC-A4ZV	prad_tcga:TCGA-G9-A9S0
prad_tcga:TCGA-YL-A8SH	prad_msk_stopsack_2021:P-0029339
prad_tcga:TCGA-V1-A9OT	prad_msk_stopsack_2021:P-0027350
prad_tcga:TCGA-YL-A8HM	prad_msk_stopsack_2021:P-0000683
prad_tcga:TCGA-G9-6499	prad_msk_stopsack_2021:P-0026072
prad_tcga:TCGA-G9-7510	prad_msk_stopsack_2021:P-0030645
prad_tcga:TCGA-CH-5751	prad_msk_stopsack_2021:P-0047937
prad_tcga:TCGA-CH-5768	prad_msk_stopsack_2021:P-0033226
prad_tcga:TCGA-CH-5792	prad_msk_stopsack_2021:P-0004312
prad_tcga:TCGA-EJ-A65M	prad_msk_stopsack_2021:P-0014076
prad_tcga:TCGA-EJ-5509	prad_msk_stopsack_2021:P-0007043
prad_tcga:TCGA-G9-6338	prad_msk_stopsack_2021:P-0012914
prad_tcga:TCGA-HC-A6AS	prad_msk_stopsack_2021:P-0029523
prad_tcga:TCGA-J4-A67T	prad_msk_stopsack_2021:P-0018607
prad_tcga:TCGA-KK-A8I9	prad_msk_stopsack_2021:P-0019624
prad_tcga:TCGA-KK-A59Z	prad_msk_stopsack_2021:P-0020394
prad_tcga:TCGA-V1-A9OX	prad_msk_stopsack_2021:P-0003665
prad_tcga:TCGA-VN-A88R	prad_msk_stopsack_2021:P-0035208
prad_tcga:TCGA-VP-A87H	prad_msk_stopsack_2021:P-0001446
prad_tcga:TCGA-XJ-A83G	prad_msk_stopsack_2021:P-0003033
prad_tcga:TCGA-XK-AAJT	prad_msk_stopsack_2021:P-0003468
prad_tcga:TCGA-EJ-5514	prad_msk_stopsack_2021:P-0003535
prad_tcga:TCGA-EJ-5542	prad_msk_stopsack_2021:P-0005436
prad_tcga:TCGA-KK-A6E7	prad_msk_stopsack_2021:P-0006635
prad_tcga:TCGA-KK-A6E3	prad_msk_stopsack_2021:P-0011377
prad_tcga:TCGA-J4-A67L	prad_msk_stopsack_2021:P-0016134
prad_tcga:TCGA-QU-A6IN	prad_msk_stopsack_2021:P-0020812
prad_tcga:TCGA-EJ-7325	prad_msk_stopsack_2021:P-0022430
prad_tcga:TCGA-FC-A66V	prad_msk_stopsack_2021:P-0022470
prad_tcga:TCGA-G9-6347	prad_msk_stopsack_2021:P-0022611
prad_tcga:TCGA-G9-6379	prad_msk_stopsack_2021:P-0024220
prad_tcga:TCGA-H9-A6BY	prad_msk_stopsack_2021:P-0025139
prad_tcga:TCGA-HC-A6AO	prad_msk_stopsack_2021:P-0025571
prad_tcga:TCGA-HC-A6AP	prad_msk_stopsack_2021:P-0027722
prad_tcga:TCGA-HC-A6AQ	prad_msk_stopsack_2021:P-0027823
prad_tcga:TCGA-HC-A6HX	prad_msk_stopsack_2021:P-0028090
prad_tcga:TCGA-J4-A67M	prad_msk_stopsack_2021:P-0040243
prad_tcga:TCGA-J4-A67O	prad_msk_stopsack_2021:P-0041549
prad_tcga:TCGA-J4-A67Q	prad_msk_stopsack_2021:P-0041944
prad_tcga:TCGA-KK-A6E4	prad_msk_stopsack_2021:P-0046881
prad_tcga:TCGA-M7-A722	prad_msk_stopsack_2021:P-0050540
prad_tcga:TCGA-QU-A6IL	prad_p1000:PROS01448-1115202-SM-5SGU5
prad_tcga:TCGA-QU-A6IM	prad_p1000:MO_1139
prad_tcga:TCGA-QU-A6IO	prad_p1000:TCGA-HC-8265
prad_tcga:TCGA-HC-7212	prad_p1000:MO_1179
prad_tcga:TCGA-KK-A8I6	prad_p1000:06-134H1_LN
prad_tcga:TCGA-V1-A9Z9	prad_p1000:MO_1161
prad_tcga:TCGA-G9-6366	prad_p1000:PROS01448-6115233-SM-67ERW
prad_tcga:TCGA-HC-A9TH	prad_p1000:03-082H1_LIVER
prad_tcga:TCGA-CH-5794	prad_p1000:TCGA-HC-A9TE
prad_tcga:TCGA-EJ-A65J	prad_p1000:SC_9162
prad_tcga:TCGA-HC-7231	prad_p1000:SC_9109
prad_tcga:TCGA-J4-A67K	prad_p1000:PROS01448-1115183-SM-5SGU3
prad_tcga:TCGA-KK-A7AY	prad_p1000:12-011I7_LN
prad_tcga:TCGA-KK-A7AU	prad_p1000:MO_1124
prad_tcga:TCGA-HC-7213	prad_p1000:MO_1215
prad_tcga:TCGA-KK-A8II	prad_p1000:MO_1410
prad_tcga:TCGA-EJ-5521	prad_p1000:PM119
prad_tcga:TCGA-HC-A631	prad_p1000:PM159
prad_tcga:TCGA-KK-A6DY	prad_p1000:PRAD-6115394.0-SM-7LGUG
prad_tcga:TCGA-VP-A872	prad_p1000:PRAD-6115400.0-SM-7LGUM
prad_tcga:TCGA-YL-A8HK	prad_p1000:PROS01448-6115219-SM-67ERS
prad_tcga:TCGA-YL-A8HL	prad_p1000:PROS11496-6115288-SM-6CNQ1
prad_tcga:TCGA-ZG-A9LM	prad_p1000:TCGA-HC-7742
prad_tcga:TCGA-CH-5769	prad_p1000:PROS01448-DFCI.10-448.P27-SM-5CQ5J
prad_tcga:TCGA-G9-6332	prad_p1000:SC_9068
prad_tcga:TCGA-KK-A7B3	prad_p1000:SC_9084
prad_tcga:TCGA-ZG-A9LZ	prad_p1000:08-093J1_LN
prad_tcga:TCGA-XK-AAIV	prad_p1000:MO_1130
prad_tcga:TCGA-YL-A9WL	prad_p1000:PROS12319B-SU2C-06115123-SM-4W2NI
prad_tcga:TCGA-V1-A9OL	prad_p1000:SC_9034
prad_tcga:TCGA-VP-AA1N	prad_p1000:SC_9132
prad_tcga:TCGA-2A-AAYU	prad_p1000:MO_1421
prad_tcga:TCGA-CH-5741	prad_p1000:PRAD-6115398.0-SM-7LGUK
prad_tcga:TCGA-CH-5744	prad_p1000:SC_9054
prad_tcga:TCGA-EJ-7314	prad_p1000:SC_9091
prad_tcga:TCGA-EJ-7788	prad_p1000:SC_9136
prad_tcga:TCGA-G9-6339	prad_p1000:SC_9148
prad_tcga:TCGA-G9-6342	prad_p1000:TP_2010
prad_tcga:TCGA-G9-7522	prad_cdk12_mskcc_2020:P-0029339
prad_tcga:TCGA-HC-A6AN	prad_cdk12_mskcc_2020:P-0000683
prad_tcga:TCGA-HC-7209	prad_cdk12_mskcc_2020:P-0026072
prad_tcga:TCGA-HC-7210	prad_cdk12_mskcc_2020:P-0033226
prad_tcga:TCGA-KK-A8IH	prad_cdk12_mskcc_2020:P-0004312
prad_tcga:TCGA-KK-A8IM	prad_cdk12_mskcc_2020:P-0014076
prad_tcga:TCGA-VN-A88Q	prad_cdk12_mskcc_2020:P-0023958
prad_tcga:TCGA-VP-A87J	prad_cdk12_mskcc_2020:P-0007043
prad_tcga:TCGA-XQ-A8TB	prad_cdk12_mskcc_2020:P-0012914
prad_tcga:TCGA-YL-A8SA	prad_cdk12_mskcc_2020:P-0014254
prad_tcga:TCGA-ZG-A9LY	prad_cdk12_mskcc_2020:P-0029523
prad_tcga:TCGA-VN-A88L	prad_cdk12_mskcc_2020:P-0018607
prad_tcga:TCGA-XJ-A9DI	prad_cdk12_mskcc_2020:P-0019624
prad_tcga:TCGA-EJ-5499	prad_cdk12_mskcc_2020:P-0020394
prad_tcga:TCGA-KK-A8IC	prad_cdk12_mskcc_2020:P-0001446
prad_tcga:TCGA-V1-A9Z8	prad_cdk12_mskcc_2020:P-0001768
prad_tcga:TCGA-EJ-5516	prad_cdk12_mskcc_2020:P-0003033
prad_tcga:TCGA-EJ-5522	prad_cdk12_mskcc_2020:P-0003468
prad_tcga:TCGA-EJ-7327	prad_cdk12_mskcc_2020:P-0003535
prad_tcga:TCGA-G9-6356	prad_cdk12_mskcc_2020:P-0005436
prad_tcga:TCGA-HC-7748	prad_cdk12_mskcc_2020:P-0006635
prad_tcga:TCGA-HC-7749	prad_cdk12_mskcc_2020:P-0007307
prad_tcga:TCGA-V1-A9O9	prad_cdk12_mskcc_2020:P-0011377
prad_tcga:TCGA-ZG-A9MC	prad_cdk12_mskcc_2020:P-0016134
prad_tcga:TCGA-EJ-5525	prad_cdk12_mskcc_2020:P-0020812
prad_tcga:TCGA-CH-5739	prad_cdk12_mskcc_2020:P-0022430
prad_tcga:TCGA-KK-A8IF	prad_cdk12_mskcc_2020:P-0022470
prad_tcga:TCGA-J4-A83J	prad_cdk12_mskcc_2020:P-0022611
prad_tcga:TCGA-V1-A9O5	prad_cdk12_mskcc_2020:P-0024220
prad_tcga:TCGA-EJ-7781	prad_cdk12_mskcc_2020:P-0025139
prad_tcga:TCGA-V1-A9ZI	prad_cdk12_mskcc_2020:P-0025571
prad_tcga:TCGA-KC-A7F6	prad_cdk12_mskcc_2020:P-0027722
prad_tcga:TCGA-VP-A87D	prad_cdk12_mskcc_2020:P-0027823
prad_tcga:TCGA-YL-A8SJ	prad_cdk12_mskcc_2020:P-0028090
prad_tcga:TCGA-ZG-A9LB	prad_pik3r1_msk_2021:P-0030645
prad_tcga:TCGA-HI-7171	prad_pik3r1_msk_2021:P-0025222
prad_tcga:TCGA-CH-5767	prad_pik3r1_msk_2021:P-0005787
prad_tcga:TCGA-EJ-5532	prad_pik3r1_msk_2021:P-0003033
prad_tcga:TCGA-HC-8266	prad_pik3r1_msk_2021:P-0003468
prad_tcga:TCGA-KK-A7AP	prad_pik3r1_msk_2021:P-0006635
prad_tcga:TCGA-V1-A8MF	prad_pik3r1_msk_2021:P-0011377
prad_tcga:TCGA-V1-A9ZK	prad_pik3r1_msk_2021:P-0016134
prad_tcga:TCGA-ZG-A9ND	prad_pik3r1_msk_2021:P-0020812
prad_msk_stopsack_2021:P-0004593	prad_pik3r1_msk_2021:P-0022430
prad_msk_stopsack_2021:P-0017940	prad_pik3r1_msk_2021:P-0022611
prad_msk_stopsack_2021:P-0010796	prad_pik3r1_msk_2021:P-0024220
prad_msk_stopsack_2021:P-0026228	prad_pik3r1_msk_2021:P-0025139
prad_msk_stopsack_2021:P-0039446	prad_pik3r1_msk_2021:P-0025571
prad_msk_stopsack_2021:P-0001426	prad_pik3r1_msk_2021:P-0027722
prad_msk_stopsack_2021:P-0030013	prad_pik3r1_msk_2021:P-0027823
prad_msk_stopsack_2021:P-0015570	prad_pik3r1_msk_2021:P-0028090
prad_msk_stopsack_2021:P-0024650	prad_pik3r1_msk_2021:P-0035270
prad_msk_stopsack_2021:P-0022249	prad_pik3r1_msk_2021:P-0037691
prad_msk_stopsack_2021:P-0012141	prad_pik3r1_msk_2021:P-0041549
prad_msk_stopsack_2021:P-0029843	prad_pik3r1_msk_2021:P-0041944
prad_msk_stopsack_2021:P-0002304	prad_pik3r1_msk_2021:P-0046881
prad_msk_stopsack_2021:P-0015058	prad_pik3r1_msk_2021:P-0053926
prad_msk_stopsack_2021:P-0042990	prad_su2c_2019:9115555
prad_msk_stopsack_2021:P-0041584	prad_su2c_2019:1115581
prad_msk_stopsack_2021:P-0006840	prad_su2c_2019:96115623
prad_msk_stopsack_2021:P-0016921	prad_su2c_2019:9115422
prad_msk_stopsack_2021:P-0020218	prad_su2c_2019:1115202
prad_msk_stopsack_2021:P-0035765	prad_su2c_2019:9115064
prad_msk_stopsack_2021:P-0044058	prad_su2c_2019:96115138
prad_msk_stopsack_2021:P-0045251	prad_su2c_2019:96115639
prad_msk_stopsack_2021:P-0048288	prad_su2c_2019:6115227
prad_msk_stopsack_2021:P-0038198	prad_su2c_2019:97115376
prad_msk_stopsack_2021:P-0028167	prad_su2c_2019:96115272
prad_msk_stopsack_2021:P-0005768	prad_su2c_2019:96115619
prad_msk_stopsack_2021:P-0016548	prad_su2c_2019:6115121
prad_msk_stopsack_2021:P-0005806	prad_su2c_2019:96115273
prad_msk_stopsack_2021:P-0029796	prad_su2c_2019:5115651
prad_msk_stopsack_2021:P-0005064	prad_su2c_2019:5115546
prad_msk_stopsack_2021:P-0015960	prad_su2c_2019:9115173
prad_msk_stopsack_2021:P-0016405	prad_su2c_2019:5115411
prad_msk_stopsack_2021:P-0012109	prad_su2c_2019:5115547
prad_msk_stopsack_2021:P-0018627	prad_su2c_2019:5115259
prad_msk_stopsack_2021:P-0034431	prad_su2c_2019:97115375
prad_msk_stopsack_2021:P-0008682	prad_su2c_2019:9115515
prad_msk_stopsack_2021:P-0006378	prad_su2c_2019:9115538
prad_msk_stopsack_2021:P-0030812	prad_su2c_2019:9115065
prad_msk_stopsack_2021:P-0032801	prad_su2c_2019:97115453
prad_msk_stopsack_2021:P-0042971	prad_su2c_2019:97115337
prad_msk_stopsack_2021:P-0047982	prad_su2c_2019:9115049
prad_msk_stopsack_2021:P-0004892	prad_su2c_2019:9115522
prad_msk_stopsack_2021:P-0016295	prad_su2c_2019:97115561
prad_msk_stopsack_2021:P-0021909	prad_su2c_2019:96115473
prad_msk_stopsack_2021:P-0027593	prad_su2c_2019:5115506
prad_msk_stopsack_2021:P-0034921	prad_su2c_2019:9115568
prad_msk_stopsack_2021:P-0041429	prad_su2c_2019:5115033
prad_msk_stopsack_2021:P-0050249	prad_su2c_2019:9115184
prad_msk_stopsack_2021:P-0009656	prad_su2c_2019:5115158
prad_msk_stopsack_2021:P-0026447	prad_su2c_2019:5115058
prad_msk_stopsack_2021:P-0026409	prad_su2c_2019:5115359
prad_msk_stopsack_2021:P-0003945	prad_su2c_2019:5115608
prad_msk_stopsack_2021:P-0031712	prad_su2c_2019:9115041
prad_msk_stopsack_2021:P-0009687	prad_su2c_2019:9115052
prad_msk_stopsack_2021:P-0021104	prad_su2c_2019:9115339
prad_msk_stopsack_2021:P-0043158	prad_su2c_2019:97115335
prad_msk_stopsack_2021:P-0032194	prad_su2c_2019:5115528
prad_msk_stopsack_2021:P-0044288	prad_su2c_2019:5115076
prad_msk_stopsack_2021:P-0000140	prad_su2c_2019:5115612
prad_msk_stopsack_2021:P-0000888	prad_su2c_2019:97115449
prad_msk_stopsack_2021:P-0009543	prad_su2c_2019:6115394
prad_msk_stopsack_2021:P-0013732	prad_su2c_2019:96115622
prad_msk_stopsack_2021:P-0013844	prad_su2c_2019:1115183
prad_msk_stopsack_2021:P-0025332	prad_su2c_2019:6115219
prad_msk_stopsack_2021:P-0043029	prad_su2c_2019:6115288
prad_msk_stopsack_2021:P-0045856	prad_su2c_2019:6115596
prad_msk_stopsack_2021:P-0001274	prad_su2c_2019:96115141
prad_msk_stopsack_2021:P-0002149	prad_su2c_2019:96115145
prad_msk_stopsack_2021:P-0006994	prad_su2c_2019:1115156
prad_msk_stopsack_2021:P-0008966	prad_su2c_2019:6115323
prad_msk_stopsack_2021:P-0011090	prad_su2c_2019:5115024
prad_msk_stopsack_2021:P-0014438	prad_su2c_2019:1115090
prad_msk_stopsack_2021:P-0025044	prad_su2c_2019:1115531
prad_msk_stopsack_2021:P-0027293	prad_su2c_2019:6115123
prad_msk_stopsack_2021:P-0033126	prad_su2c_2019:6115403
prad_msk_stopsack_2021:P-0000610	prad_su2c_2019:96115508
prad_msk_stopsack_2021:P-0000935	prad_su2c_2019:96115629
prad_msk_stopsack_2021:P-0001108	prad_su2c_2019:96115630
prad_msk_stopsack_2021:P-0001698	prad_su2c_2019:5115186
prad_msk_stopsack_2021:P-0005454	prad_su2c_2019:5115613
prad_msk_stopsack_2021:P-0006767	prad_su2c_2019:9115180
prad_msk_stopsack_2021:P-0006856	prad_su2c_2019:5115615
prad_msk_stopsack_2021:P-0007749	prad_su2c_2019:5115057
prad_msk_stopsack_2021:P-0008074	prad_su2c_2019:9115107
prad_msk_stopsack_2021:P-0008206	prad_su2c_2019:5115276
prad_msk_stopsack_2021:P-0010015	prad_su2c_2019:6115014
prad_msk_stopsack_2021:P-0011096	prad_su2c_2019:6115398
prad_msk_stopsack_2021:P-0012197	prad_su2c_2019:9115324
prad_msk_stopsack_2021:P-0012368	prad_su2c_2019:96115214
prad_msk_stopsack_2021:P-0013116	prad_su2c_2019:96115275
prad_msk_stopsack_2021:P-0013457	prad_su2c_2019:96115642
prad_msk_stopsack_2021:P-0013465	prad_su2c_2019:96115645
prad_msk_stopsack_2021:P-0013674	prad_mcspc_mskcc_2020:P-0000683
prad_msk_stopsack_2021:P-0014004	prad_mcspc_mskcc_2020:P-0033226
prad_msk_stopsack_2021:P-0014841	prad_mcspc_mskcc_2020:P-0014076
prad_msk_stopsack_2021:P-0015628	prad_mcspc_mskcc_2020:P-0007043
prad_msk_stopsack_2021:P-0016015	prad_mcspc_mskcc_2020:P-0012914
prad_msk_stopsack_2021:P-0016396	prad_mcspc_mskcc_2020:P-0014254
prad_msk_stopsack_2021:P-0016812	prad_mcspc_mskcc_2020:P-0029523
prad_msk_stopsack_2021:P-0017605	prad_mcspc_mskcc_2020:P-0019624
prad_msk_stopsack_2021:P-0017882	prad_mcspc_mskcc_2020:P-0025222
prad_msk_stopsack_2021:P-0017886	prad_mcspc_mskcc_2020:P-0003033
prad_msk_stopsack_2021:P-0018791	prad_mcspc_mskcc_2020:P-0005436
prad_msk_stopsack_2021:P-0020984	prad_mcspc_mskcc_2020:P-0011377
prad_msk_stopsack_2021:P-0021023	prad_mcspc_mskcc_2020:P-0020812
prad_msk_stopsack_2021:P-0021342	prad_mcspc_mskcc_2020:P-0027823
prad_msk_stopsack_2021:P-0022437	prad_mskcc:PCA0210
prad_msk_stopsack_2021:P-0022439	prad_mskcc:PCA0208
prad_msk_stopsack_2021:P-0022700	prad_mskcc:PCA0209
prad_msk_stopsack_2021:P-0023030	prad_mskcc:PCA0193
prad_msk_stopsack_2021:P-0023249
prad_msk_stopsack_2021:P-0023276
prad_msk_stopsack_2021:P-0023546
prad_msk_stopsack_2021:P-0024598
prad_msk_stopsack_2021:P-0025150
prad_msk_stopsack_2021:P-0025494
prad_msk_stopsack_2021:P-0026395
prad_msk_stopsack_2021:P-0026808
prad_msk_stopsack_2021:P-0028569
prad_msk_stopsack_2021:P-0029948
prad_msk_stopsack_2021:P-0030086
prad_msk_stopsack_2021:P-0030801
prad_msk_stopsack_2021:P-0033660
prad_msk_stopsack_2021:P-0035818
prad_msk_stopsack_2021:P-0036176
prad_msk_stopsack_2021:P-0036349
prad_msk_stopsack_2021:P-0037029
prad_msk_stopsack_2021:P-0037689
prad_msk_stopsack_2021:P-0037701
prad_msk_stopsack_2021:P-0038369
prad_msk_stopsack_2021:P-0040519
prad_msk_stopsack_2021:P-0042252
prad_msk_stopsack_2021:P-0042583
prad_msk_stopsack_2021:P-0042663
prad_msk_stopsack_2021:P-0043323
prad_msk_stopsack_2021:P-0043708
prad_msk_stopsack_2021:P-0044256
prad_msk_stopsack_2021:P-0045146
prad_msk_stopsack_2021:P-0047959
prad_msk_stopsack_2021:P-0049886
prad_msk_stopsack_2021:P-0050289
prad_msk_stopsack_2021:P-0017491
prad_msk_stopsack_2021:P-0000828
prad_msk_stopsack_2021:P-0002364
prad_msk_stopsack_2021:P-0002382
prad_msk_stopsack_2021:P-0002901
prad_msk_stopsack_2021:P-0002961
prad_msk_stopsack_2021:P-0002974
prad_msk_stopsack_2021:P-0002990
prad_msk_stopsack_2021:P-0002999
prad_msk_stopsack_2021:P-0003040
prad_msk_stopsack_2021:P-0003626
prad_msk_stopsack_2021:P-0003758
prad_msk_stopsack_2021:P-0004482
prad_msk_stopsack_2021:P-0004826
prad_msk_stopsack_2021:P-0005045
prad_msk_stopsack_2021:P-0005596
prad_msk_stopsack_2021:P-0006389
prad_msk_stopsack_2021:P-0006670
prad_msk_stopsack_2021:P-0007098
prad_msk_stopsack_2021:P-0007547
prad_msk_stopsack_2021:P-0008452
prad_msk_stopsack_2021:P-0008852
prad_msk_stopsack_2021:P-0009374
prad_msk_stopsack_2021:P-0009654
prad_msk_stopsack_2021:P-0010657
prad_msk_stopsack_2021:P-0011483
prad_msk_stopsack_2021:P-0012030
prad_msk_stopsack_2021:P-0012048
prad_msk_stopsack_2021:P-0013038
prad_msk_stopsack_2021:P-0013729
prad_msk_stopsack_2021:P-0013810
prad_msk_stopsack_2021:P-0013936
prad_msk_stopsack_2021:P-0014523
prad_msk_stopsack_2021:P-0014629
prad_msk_stopsack_2021:P-0014686
prad_msk_stopsack_2021:P-0015209
prad_msk_stopsack_2021:P-0015744
prad_msk_stopsack_2021:P-0015837
prad_msk_stopsack_2021:P-0016325
prad_msk_stopsack_2021:P-0016386
prad_msk_stopsack_2021:P-0016733
prad_msk_stopsack_2021:P-0016961
prad_msk_stopsack_2021:P-0017232
prad_msk_stopsack_2021:P-0017262
prad_msk_stopsack_2021:P-0017730
prad_msk_stopsack_2021:P-0017844
prad_msk_stopsack_2021:P-0018235
prad_msk_stopsack_2021:P-0018315
prad_msk_stopsack_2021:P-0018605
prad_msk_stopsack_2021:P-0018713
prad_msk_stopsack_2021:P-0019030
prad_msk_stopsack_2021:P-0019420
prad_msk_stopsack_2021:P-0019830
prad_msk_stopsack_2021:P-0019930
prad_msk_stopsack_2021:P-0020111
prad_msk_stopsack_2021:P-0020482
prad_msk_stopsack_2021:P-0020792
prad_msk_stopsack_2021:P-0021626
prad_msk_stopsack_2021:P-0021723
prad_msk_stopsack_2021:P-0021728
prad_msk_stopsack_2021:P-0021792
prad_msk_stopsack_2021:P-0022197
prad_msk_stopsack_2021:P-0022782
prad_msk_stopsack_2021:P-0023318
prad_msk_stopsack_2021:P-0023666
prad_msk_stopsack_2021:P-0024538
prad_msk_stopsack_2021:P-0025562
prad_msk_stopsack_2021:P-0026152
prad_msk_stopsack_2021:P-0026153
prad_msk_stopsack_2021:P-0026162
prad_msk_stopsack_2021:P-0026202
prad_msk_stopsack_2021:P-0026369
prad_msk_stopsack_2021:P-0026673
prad_msk_stopsack_2021:P-0026774
prad_msk_stopsack_2021:P-0027210
prad_msk_stopsack_2021:P-0027526
prad_msk_stopsack_2021:P-0029655
prad_msk_stopsack_2021:P-0030521
prad_msk_stopsack_2021:P-0031178
prad_msk_stopsack_2021:P-0031426
prad_msk_stopsack_2021:P-0031991
prad_msk_stopsack_2021:P-0032027
prad_msk_stopsack_2021:P-0032651
prad_msk_stopsack_2021:P-0032799
prad_msk_stopsack_2021:P-0033105
prad_msk_stopsack_2021:P-0034327
prad_msk_stopsack_2021:P-0035284
prad_msk_stopsack_2021:P-0036007
prad_msk_stopsack_2021:P-0036235
prad_msk_stopsack_2021:P-0036351
prad_msk_stopsack_2021:P-0037572
prad_msk_stopsack_2021:P-0037664
prad_msk_stopsack_2021:P-0037814
prad_msk_stopsack_2021:P-0039006
prad_msk_stopsack_2021:P-0039234
prad_msk_stopsack_2021:P-0040786
prad_msk_stopsack_2021:P-0041034
prad_msk_stopsack_2021:P-0041103
prad_msk_stopsack_2021:P-0041945
prad_msk_stopsack_2021:P-0043325
prad_msk_stopsack_2021:P-0043520
prad_msk_stopsack_2021:P-0043583
prad_msk_stopsack_2021:P-0044245
prad_msk_stopsack_2021:P-0045289
prad_msk_stopsack_2021:P-0045358
prad_msk_stopsack_2021:P-0048357
prad_msk_stopsack_2021:P-0048510
prad_msk_stopsack_2021:P-0048977
prad_msk_stopsack_2021:P-0050083
prad_msk_stopsack_2021:P-0050123
prad_msk_stopsack_2021:P-0050552
prad_msk_stopsack_2021:P-0017097
prad_msk_stopsack_2021:P-0003052
prad_msk_stopsack_2021:P-0031855
prad_msk_stopsack_2021:P-0036352
prad_msk_stopsack_2021:P-0043336
prad_msk_stopsack_2021:P-0003101
prad_msk_stopsack_2021:P-0008461
prad_msk_stopsack_2021:P-0016538
prad_msk_stopsack_2021:P-0040334
prad_msk_stopsack_2021:P-0032646
prad_msk_stopsack_2021:P-0001242
prad_msk_stopsack_2021:P-0001697
prad_msk_stopsack_2021:P-0001768
prad_msk_stopsack_2021:P-0002840
prad_msk_stopsack_2021:P-0002880
prad_msk_stopsack_2021:P-0002894
prad_msk_stopsack_2021:P-0003442
prad_msk_stopsack_2021:P-0003450
prad_msk_stopsack_2021:P-0003592
prad_msk_stopsack_2021:P-0004387
prad_msk_stopsack_2021:P-0004474
prad_msk_stopsack_2021:P-0005047
prad_msk_stopsack_2021:P-0005216
prad_msk_stopsack_2021:P-0005535
prad_msk_stopsack_2021:P-0005546
prad_msk_stopsack_2021:P-0005571
prad_msk_stopsack_2021:P-0005787
prad_msk_stopsack_2021:P-0006247
prad_msk_stopsack_2021:P-0006749
prad_msk_stopsack_2021:P-0007267
prad_msk_stopsack_2021:P-0007307
prad_msk_stopsack_2021:P-0007313
prad_msk_stopsack_2021:P-0007332
prad_msk_stopsack_2021:P-0007343
prad_msk_stopsack_2021:P-0007734
prad_msk_stopsack_2021:P-0007877
prad_msk_stopsack_2021:P-0007900
prad_msk_stopsack_2021:P-0008048
prad_msk_stopsack_2021:P-0008383
prad_msk_stopsack_2021:P-0008591
prad_msk_stopsack_2021:P-0008812
prad_msk_stopsack_2021:P-0008858
prad_msk_stopsack_2021:P-0009056
prad_msk_stopsack_2021:P-0009399
prad_msk_stopsack_2021:P-0009448
prad_msk_stopsack_2021:P-0009679
prad_msk_stopsack_2021:P-0009818
prad_msk_stopsack_2021:P-0010240
prad_msk_stopsack_2021:P-0010523
prad_msk_stopsack_2021:P-0010529
prad_msk_stopsack_2021:P-0010953
prad_msk_stopsack_2021:P-0011437
prad_msk_stopsack_2021:P-0011577
prad_msk_stopsack_2021:P-0012834
prad_msk_stopsack_2021:P-0012929
prad_msk_stopsack_2021:P-0013037
prad_msk_stopsack_2021:P-0013372
prad_msk_stopsack_2021:P-0013526
prad_msk_stopsack_2021:P-0013733
prad_msk_stopsack_2021:P-0014299
prad_msk_stopsack_2021:P-0014991
prad_msk_stopsack_2021:P-0015452
prad_msk_stopsack_2021:P-0015552
prad_msk_stopsack_2021:P-0016236
prad_msk_stopsack_2021:P-0016288
prad_msk_stopsack_2021:P-0016307
prad_msk_stopsack_2021:P-0016930
prad_msk_stopsack_2021:P-0017287
prad_msk_stopsack_2021:P-0017543
prad_msk_stopsack_2021:P-0017686
prad_msk_stopsack_2021:P-0017944
prad_msk_stopsack_2021:P-0018956
prad_msk_stopsack_2021:P-0019782
prad_msk_stopsack_2021:P-0020132
prad_msk_stopsack_2021:P-0021240
prad_msk_stopsack_2021:P-0021547
prad_msk_stopsack_2021:P-0021711
prad_msk_stopsack_2021:P-0021782
prad_msk_stopsack_2021:P-0021853
prad_msk_stopsack_2021:P-0022060
prad_msk_stopsack_2021:P-0022865
prad_msk_stopsack_2021:P-0023401
prad_msk_stopsack_2021:P-0023405
prad_msk_stopsack_2021:P-0023594
prad_msk_stopsack_2021:P-0024097
prad_msk_stopsack_2021:P-0028587
prad_msk_stopsack_2021:P-0028775
prad_msk_stopsack_2021:P-0029105
prad_msk_stopsack_2021:P-0033114
prad_msk_stopsack_2021:P-0033832
prad_msk_stopsack_2021:P-0034278
prad_msk_stopsack_2021:P-0035107
prad_msk_stopsack_2021:P-0035472
prad_msk_stopsack_2021:P-0035807
prad_msk_stopsack_2021:P-0035854
prad_msk_stopsack_2021:P-0036804
prad_msk_stopsack_2021:P-0037126
prad_msk_stopsack_2021:P-0041631
prad_msk_stopsack_2021:P-0043581
prad_msk_stopsack_2021:P-0044793
prad_msk_stopsack_2021:P-0044915
prad_msk_stopsack_2021:P-0045238
prad_msk_stopsack_2021:P-0045286
prad_msk_stopsack_2021:P-0047470
prad_msk_stopsack_2021:P-0047574
prad_msk_stopsack_2021:P-0047763
prad_msk_stopsack_2021:P-0048031
prad_msk_stopsack_2021:P-0048085
prad_msk_stopsack_2021:P-0048150
prad_msk_stopsack_2021:P-0048500
prad_msk_stopsack_2021:P-0048980
prad_msk_stopsack_2021:P-0049427
prad_p1000:PROS12319B-SU2C-06115121-SM-4W2NG
prad_p1000:PROS01448-1115161-SM-5SGU1
prad_p1000:PROS11496-6115285-SM-6CNPX
prad_p1000:TCGA-EJ-A7NM
prad_p1000:TCGA-EJ-5518
prad_p1000:TCGA-XK-AAIR
prad_p1000:TCGA-ZG-A9KY
prad_p1000:SC_9087
prad_p1000:TP_2064
prad_p1000:07-042H2_LN
prad_p1000:AAPC-STID0000021534-Tumor-SM-2XTYJ
prad_p1000:AAPC-STID0000021551-Tumor-SM-2XTYN
prad_p1000:PRAD-01115265-SM-6WZFB
prad_p1000:SC_9055
prad_p1000:TCGA-EJ-5515
prad_p1000:TCGA-EJ-5524
prad_p1000:TCGA-HC-A6HX
prad_p1000:SC_9047
prad_p1000:PR-01-2492
prad_p1000:PRAD-01115263-SM-6WZF9
prad_p1000:PM14
prad_p1000:PR-05-839
prad_p1000:PRAD-06115124-SM-7LGU1
prad_p1000:MO_1128
prad_p1000:PRAD-6115383.0-SM-7LGU6
prad_p1000:SC_9121
prad_p1000:TCGA-G9-6499
prad_p1000:TCGA-G9-7510
prad_p1000:05-217L3_LUNG
prad_p1000:P04-2599
prad_p1000:P05-2212
prad_p1000:P09-649
prad_p1000:PR-04-3113
prad_p1000:PR-04-3222
prad_p1000:PR-2761
prad_p1000:TCGA-CH-5768
prad_p1000:TCGA-EJ-A65M
prad_p1000:TCGA-EJ-5509
prad_p1000:TCGA-FC-A6HD
prad_p1000:TCGA-HC-A6AS
prad_p1000:TCGA-J4-A67T
prad_p1000:TCGA-KK-A6E0
prad_p1000:TCGA-KK-A8I9
prad_p1000:TCGA-KK-A59Z
prad_p1000:TCGA-V1-A9OT
prad_p1000:TCGA-VN-A88N
prad_p1000:TCGA-VN-A88R
prad_p1000:TCGA-YL-A8HM
prad_p1000:PR-09-3566
prad_p1000:PRAD-6115401.0-SM-7LGUO
prad_p1000:SC_9173
prad_p1000:TCGA-EJ-7327
prad_p1000:10362
prad_p1000:11-028L1_LUNG
prad_p1000:SC_9035
prad_p1000:SC_9063
prad_p1000:TCGA-KK-A8IA
prad_p1000:TCGA-YL-A8SC
prad_p1000:TP_2001
prad_p1000:TP_2061
prad_p1000:PROS10448-1115156-SM-5EEBN
prad_p1000:PROS11496-6115323-SM-6CNQ8
prad_p1000:TCGA-HC-7213
prad_p1000:TCGA-KK-A8II
prad_p1000:MO_1020
prad_p1000:MO_1095
prad_p1000:MO_1192
prad_p1000:P04-1243
prad_p1000:P06-4428
prad_p1000:PR-0415
prad_p1000:PRAD-6115387.0-SM-7LGU9
prad_p1000:PRAD-6115391.0-SM-7LGUD
prad_p1000:PRAD-6115395.0-SM-7LGUH
prad_p1000:PROS11496-6115317-SM-6CNQ2
prad_p1000:SC_9024
prad_p1000:SC_9046
prad_p1000:SC_9086
prad_p1000:SC_9092
prad_p1000:SC_9137
prad_p1000:SC_9153
prad_p1000:TCGA-YL-A8HL
prad_p1000:TCGA-ZG-A9LM
prad_p1000:10361
prad_p1000:01-120A1_LIVER
prad_p1000:03-139E3_RETROPERITONEAL
prad_p1000:03-192B_LUNG
prad_p1000:05-011G4_LUNG
prad_p1000:08-006H1_LN
prad_p1000:MO_1054
prad_p1000:MO_1084
prad_p1000:MO_1202
prad_p1000:MO_1249
prad_p1000:MO_1337
prad_p1000:P03-1334
prad_p1000:P03-1906
prad_p1000:P04-1084
prad_p1000:P09-1580
prad_p1000:PM15
prad_p1000:PR-01-1934
prad_p1000:PR-01-2554
prad_p1000:PR-02-1082
prad_p1000:PR-02-2072
prad_p1000:PR-03-1026
prad_p1000:PR-04-903
prad_p1000:PR-06-1651
prad_p1000:PR-09-5094
prad_p1000:PR-1024
prad_p1000:PRAD-6115390.0-SM-7LGUC
prad_p1000:PRAD-6115397.0-SM-7LGUJ
prad_p1000:PRAD-6115403.0-SM-7LGUQ
prad_p1000:PROS01448-DFCI.10-448.P05-SM-581SL
prad_p1000:PROS01448-DFCI.10-448.P15-SM-5CQ5D
prad_p1000:PROS01448-DFCI.10-448.P42-SM-5CQ55
prad_p1000:PROS01448-6115224-SM-67ERT
prad_p1000:PROS01448-6115227-SM-67ERU
prad_p1000:PROS10448-SUTC.01115081-SM-4JC6A
prad_p1000:PROS10448-1115157-SM-5EEBO
prad_p1000:PROS11496-6115236-SM-6CNPW
prad_p1000:PROS12319B-SU2C-06115117-SM-4W2NC
prad_p1000:SC_9011
prad_p1000:SC_9059
prad_p1000:SC_9105
prad_p1000:SC_9129
prad_p1000:SC_9158
prad_p1000:TCGA-2A-AAYU
prad_p1000:TCGA-CH-5741
prad_p1000:TCGA-G9-6332
prad_p1000:TCGA-J4-AATZ
prad_p1000:TCGA-KK-A7B3
prad_p1000:TCGA-KK-A8IH
prad_p1000:TCGA-KK-A8IM
prad_p1000:TCGA-XQ-A8TA
prad_p1000:TCGA-XQ-A8TB
prad_p1000:TCGA-YL-A8SA
prad_p1000:TCGA-YL-A8SL
prad_p1000:TCGA-YL-A9WL
prad_p1000:TP_2032
prad_p1000:TP_2034
prad_p1000:TP_2069
prad_p1000:TP_2078
prad_p1000:99-064O_LN
prad_p1000:99-090A2_LIVER
prad_p1000:99-091J_LN
prad_p1000:21017
prad_p1000:24854
prad_p1000:SC_9076
prad_p1000:PRAD-6115393.0-SM-7LGUF
prad_p1000:TCGA-EJ-5525
prad_p1000:03-130L_RETROPERITONEAL
prad_p1000:MO_1014
prad_p1000:MO_1176
prad_p1000:MO_1244
prad_p1000:P03-871
prad_p1000:PM189
prad_p1000:PRAD-01115264-SM-6WZFA
prad_p1000:PROS01448-6115237-SM-67ERZ
prad_p1000:PROS10448-SUTC.01115088-SM-4JC6Q
prad_p1000:SC_9016
prad_p1000:SC_9018
prad_p1000:SC_9019
prad_p1000:SC_9060
prad_p1000:SC_9061
prad_p1000:SC_9090
prad_p1000:SC_9141
prad_p1000:TCGA-EJ-7781
prad_p1000:TCGA-KC-A7F6
prad_p1000:TCGA-V1-A9ZI
prad_p1000:TCGA-YL-A8SJ
prad_p1000:TCGA-ZG-A9L0
prad_p1000:TCGA-ZG-A9M4
prad_p1000:TP_2060
prad_p1000:TP_2079
prad_p1000:10363
prad_p1000:12688
prad_p1000:26731
prad_cdk12_mskcc_2020:P-0016768
prad_cdk12_mskcc_2020:P-0004593
prad_cdk12_mskcc_2020:P-0017940
prad_cdk12_mskcc_2020:P-0010796
prad_cdk12_mskcc_2020:P-0026228
prad_cdk12_mskcc_2020:P-0001426
prad_cdk12_mskcc_2020:P-0022249
prad_cdk12_mskcc_2020:P-0029843
prad_cdk12_mskcc_2020:P-0002304
prad_cdk12_mskcc_2020:P-0012834
prad_cdk12_mskcc_2020:P-0001204
prad_cdk12_mskcc_2020:P-0006840
prad_cdk12_mskcc_2020:P-0016921
prad_cdk12_mskcc_2020:P-0020218
prad_cdk12_mskcc_2020:P-0028167
prad_cdk12_mskcc_2020:P-0005768
prad_cdk12_mskcc_2020:P-0016548
prad_cdk12_mskcc_2020:P-0030521
prad_cdk12_mskcc_2020:P-0005806
prad_cdk12_mskcc_2020:P-0029796
prad_cdk12_mskcc_2020:P-0015960
prad_cdk12_mskcc_2020:P-0016405
prad_cdk12_mskcc_2020:P-0012109
prad_cdk12_mskcc_2020:P-0018627
prad_cdk12_mskcc_2020:P-0006378
prad_cdk12_mskcc_2020:P-0022672
prad_cdk12_mskcc_2020:P-0032801
prad_cdk12_mskcc_2020:P-0004892
prad_cdk12_mskcc_2020:P-0016295
prad_cdk12_mskcc_2020:P-0021909
prad_cdk12_mskcc_2020:P-0027593
prad_cdk12_mskcc_2020:P-0009656
prad_cdk12_mskcc_2020:P-0026447
prad_cdk12_mskcc_2020:P-0026409
prad_cdk12_mskcc_2020:P-0003945
prad_cdk12_mskcc_2020:P-0031712
prad_cdk12_mskcc_2020:P-0009687
prad_cdk12_mskcc_2020:P-0021104
prad_cdk12_mskcc_2020:P-0005454
prad_cdk12_mskcc_2020:P-0022439
prad_cdk12_mskcc_2020:P-0032194
prad_cdk12_mskcc_2020:P-0003541
prad_cdk12_mskcc_2020:P-0009543
prad_cdk12_mskcc_2020:P-0013732
prad_cdk12_mskcc_2020:P-0014333
prad_cdk12_mskcc_2020:P-0025332
prad_cdk12_mskcc_2020:P-0001274
prad_cdk12_mskcc_2020:P-0002149
prad_cdk12_mskcc_2020:P-0006994
prad_cdk12_mskcc_2020:P-0008966
prad_cdk12_mskcc_2020:P-0011090
prad_cdk12_mskcc_2020:P-0014438
prad_cdk12_mskcc_2020:P-0025044
prad_cdk12_mskcc_2020:P-0027293
prad_cdk12_mskcc_2020:P-0000610
prad_cdk12_mskcc_2020:P-0000935
prad_cdk12_mskcc_2020:P-0001108
prad_cdk12_mskcc_2020:P-0001698
prad_cdk12_mskcc_2020:P-0006767
prad_cdk12_mskcc_2020:P-0006856
prad_cdk12_mskcc_2020:P-0007219
prad_cdk12_mskcc_2020:P-0007749
prad_cdk12_mskcc_2020:P-0008074
prad_cdk12_mskcc_2020:P-0008206
prad_cdk12_mskcc_2020:P-0008525
prad_cdk12_mskcc_2020:P-0010015
prad_cdk12_mskcc_2020:P-0011096
prad_cdk12_mskcc_2020:P-0012197
prad_cdk12_mskcc_2020:P-0012368
prad_cdk12_mskcc_2020:P-0013032
prad_cdk12_mskcc_2020:P-0013457
prad_cdk12_mskcc_2020:P-0013465
prad_cdk12_mskcc_2020:P-0013674
prad_cdk12_mskcc_2020:P-0014004
prad_cdk12_mskcc_2020:P-0014841
prad_cdk12_mskcc_2020:P-0015628
prad_cdk12_mskcc_2020:P-0016396
prad_cdk12_mskcc_2020:P-0016812
prad_cdk12_mskcc_2020:P-0017605
prad_cdk12_mskcc_2020:P-0017882
prad_cdk12_mskcc_2020:P-0017886
prad_cdk12_mskcc_2020:P-0018791
prad_cdk12_mskcc_2020:P-0020984
prad_cdk12_mskcc_2020:P-0021023
prad_cdk12_mskcc_2020:P-0021342
prad_cdk12_mskcc_2020:P-0022437
prad_cdk12_mskcc_2020:P-0022700
prad_cdk12_mskcc_2020:P-0023030
prad_cdk12_mskcc_2020:P-0023249
prad_cdk12_mskcc_2020:P-0023276
prad_cdk12_mskcc_2020:P-0023546
prad_cdk12_mskcc_2020:P-0024598
prad_cdk12_mskcc_2020:P-0024913
prad_cdk12_mskcc_2020:P-0025150
prad_cdk12_mskcc_2020:P-0025494
prad_cdk12_mskcc_2020:P-0026395
prad_cdk12_mskcc_2020:P-0026808
prad_cdk12_mskcc_2020:P-0030801
prad_cdk12_mskcc_2020:P-0038369
prad_cdk12_mskcc_2020:P-0017491
prad_cdk12_mskcc_2020:P-0000318
prad_cdk12_mskcc_2020:P-0000828
prad_cdk12_mskcc_2020:P-0000966
prad_cdk12_mskcc_2020:P-0001141
prad_cdk12_mskcc_2020:P-0002364
prad_cdk12_mskcc_2020:P-0002382
prad_cdk12_mskcc_2020:P-0002739
prad_cdk12_mskcc_2020:P-0002901
prad_cdk12_mskcc_2020:P-0002961
prad_cdk12_mskcc_2020:P-0002974
prad_cdk12_mskcc_2020:P-0002990
prad_cdk12_mskcc_2020:P-0002999
prad_cdk12_mskcc_2020:P-0003040
prad_cdk12_mskcc_2020:P-0003226
prad_cdk12_mskcc_2020:P-0003419
prad_cdk12_mskcc_2020:P-0003626
prad_cdk12_mskcc_2020:P-0003684
prad_cdk12_mskcc_2020:P-0004482
prad_cdk12_mskcc_2020:P-0004826
prad_cdk12_mskcc_2020:P-0005045
prad_cdk12_mskcc_2020:P-0005596
prad_cdk12_mskcc_2020:P-0006389
prad_cdk12_mskcc_2020:P-0006670
prad_cdk12_mskcc_2020:P-0007098
prad_cdk12_mskcc_2020:P-0007547
prad_cdk12_mskcc_2020:P-0008452
prad_cdk12_mskcc_2020:P-0008852
prad_cdk12_mskcc_2020:P-0008960
prad_cdk12_mskcc_2020:P-0009374
prad_cdk12_mskcc_2020:P-0009654
prad_cdk12_mskcc_2020:P-0010178
prad_cdk12_mskcc_2020:P-0010657
prad_cdk12_mskcc_2020:P-0011483
prad_cdk12_mskcc_2020:P-0012030
prad_cdk12_mskcc_2020:P-0012048
prad_cdk12_mskcc_2020:P-0012104
prad_cdk12_mskcc_2020:P-0012141
prad_cdk12_mskcc_2020:P-0013038
prad_cdk12_mskcc_2020:P-0013358
prad_cdk12_mskcc_2020:P-0013729
prad_cdk12_mskcc_2020:P-0013810
prad_cdk12_mskcc_2020:P-0013936
prad_cdk12_mskcc_2020:P-0014523
prad_cdk12_mskcc_2020:P-0014629
prad_cdk12_mskcc_2020:P-0014686
prad_cdk12_mskcc_2020:P-0015209
prad_cdk12_mskcc_2020:P-0015744
prad_cdk12_mskcc_2020:P-0015837
prad_cdk12_mskcc_2020:P-0015925
prad_cdk12_mskcc_2020:P-0016325
prad_cdk12_mskcc_2020:P-0016386
prad_cdk12_mskcc_2020:P-0016733
prad_cdk12_mskcc_2020:P-0016961
prad_cdk12_mskcc_2020:P-0017232
prad_cdk12_mskcc_2020:P-0017262
prad_cdk12_mskcc_2020:P-0017730
prad_cdk12_mskcc_2020:P-0017754
prad_cdk12_mskcc_2020:P-0017844
prad_cdk12_mskcc_2020:P-0018235
prad_cdk12_mskcc_2020:P-0018315
prad_cdk12_mskcc_2020:P-0018605
prad_cdk12_mskcc_2020:P-0018659
prad_cdk12_mskcc_2020:P-0018713
prad_cdk12_mskcc_2020:P-0019030
prad_cdk12_mskcc_2020:P-0019420
prad_cdk12_mskcc_2020:P-0019830
prad_cdk12_mskcc_2020:P-0019930
prad_cdk12_mskcc_2020:P-0020111
prad_cdk12_mskcc_2020:P-0020482
prad_cdk12_mskcc_2020:P-0020792
prad_cdk12_mskcc_2020:P-0021626
prad_cdk12_mskcc_2020:P-0021723
prad_cdk12_mskcc_2020:P-0021728
prad_cdk12_mskcc_2020:P-0021792
prad_cdk12_mskcc_2020:P-0022197
prad_cdk12_mskcc_2020:P-0022782
prad_cdk12_mskcc_2020:P-0023318
prad_cdk12_mskcc_2020:P-0023666
prad_cdk12_mskcc_2020:P-0024538
prad_cdk12_mskcc_2020:P-0024648
prad_cdk12_mskcc_2020:P-0025138
prad_cdk12_mskcc_2020:P-0025562
prad_cdk12_mskcc_2020:P-0026152
prad_cdk12_mskcc_2020:P-0026153
prad_cdk12_mskcc_2020:P-0026162
prad_cdk12_mskcc_2020:P-0026202
prad_cdk12_mskcc_2020:P-0026369
prad_cdk12_mskcc_2020:P-0026673
prad_cdk12_mskcc_2020:P-0026774
prad_cdk12_mskcc_2020:P-0027210
prad_cdk12_mskcc_2020:P-0027526
prad_cdk12_mskcc_2020:P-0031062
prad_cdk12_mskcc_2020:P-0031426
prad_cdk12_mskcc_2020:P-0031991
prad_cdk12_mskcc_2020:P-0032651
prad_cdk12_mskcc_2020:P-0032799
prad_cdk12_mskcc_2020:P-0033105
prad_cdk12_mskcc_2020:P-0017097
prad_cdk12_mskcc_2020:P-0003052
prad_cdk12_mskcc_2020:P-0025222
prad_cdk12_mskcc_2020:P-0007343
prad_cdk12_mskcc_2020:P-0003101
prad_cdk12_mskcc_2020:P-0008461
prad_cdk12_mskcc_2020:P-0016538
prad_cdk12_mskcc_2020:P-0032646
prad_cdk12_mskcc_2020:P-0001242
prad_cdk12_mskcc_2020:P-0001697
prad_cdk12_mskcc_2020:P-0002840
prad_cdk12_mskcc_2020:P-0002880
prad_cdk12_mskcc_2020:P-0002894
prad_cdk12_mskcc_2020:P-0003442
prad_cdk12_mskcc_2020:P-0003450
prad_cdk12_mskcc_2020:P-0003592
prad_cdk12_mskcc_2020:P-0004285
prad_cdk12_mskcc_2020:P-0004597
prad_cdk12_mskcc_2020:P-0005047
prad_cdk12_mskcc_2020:P-0005216
prad_cdk12_mskcc_2020:P-0005535
prad_cdk12_mskcc_2020:P-0005546
prad_cdk12_mskcc_2020:P-0005571
prad_cdk12_mskcc_2020:P-0005787
prad_cdk12_mskcc_2020:P-0006247
prad_cdk12_mskcc_2020:P-0006749
prad_cdk12_mskcc_2020:P-0007267
prad_cdk12_mskcc_2020:P-0007313
prad_cdk12_mskcc_2020:P-0007332
prad_cdk12_mskcc_2020:P-0007734
prad_cdk12_mskcc_2020:P-0007877
prad_cdk12_mskcc_2020:P-0008048
prad_cdk12_mskcc_2020:P-0008383
prad_cdk12_mskcc_2020:P-0008591
prad_cdk12_mskcc_2020:P-0008812
prad_cdk12_mskcc_2020:P-0008858
prad_cdk12_mskcc_2020:P-0009056
prad_cdk12_mskcc_2020:P-0009399
prad_cdk12_mskcc_2020:P-0009448
prad_cdk12_mskcc_2020:P-0009818
prad_cdk12_mskcc_2020:P-0010240
prad_cdk12_mskcc_2020:P-0010523
prad_cdk12_mskcc_2020:P-0010529
prad_cdk12_mskcc_2020:P-0010953
prad_cdk12_mskcc_2020:P-0011437
prad_cdk12_mskcc_2020:P-0011577
prad_cdk12_mskcc_2020:P-0012929
prad_cdk12_mskcc_2020:P-0013037
prad_cdk12_mskcc_2020:P-0013372
prad_cdk12_mskcc_2020:P-0013526
prad_cdk12_mskcc_2020:P-0013733
prad_cdk12_mskcc_2020:P-0014299
prad_cdk12_mskcc_2020:P-0014991
prad_cdk12_mskcc_2020:P-0015206
prad_cdk12_mskcc_2020:P-0015452
prad_cdk12_mskcc_2020:P-0015552
prad_cdk12_mskcc_2020:P-0016236
prad_cdk12_mskcc_2020:P-0016288
prad_cdk12_mskcc_2020:P-0016307
prad_cdk12_mskcc_2020:P-0016490
prad_cdk12_mskcc_2020:P-0016930
prad_cdk12_mskcc_2020:P-0017287
prad_cdk12_mskcc_2020:P-0017376
prad_cdk12_mskcc_2020:P-0017543
prad_cdk12_mskcc_2020:P-0017686
prad_cdk12_mskcc_2020:P-0017944
prad_cdk12_mskcc_2020:P-0018812
prad_cdk12_mskcc_2020:P-0018956
prad_cdk12_mskcc_2020:P-0019782
prad_cdk12_mskcc_2020:P-0020132
prad_cdk12_mskcc_2020:P-0021240
prad_cdk12_mskcc_2020:P-0021547
prad_cdk12_mskcc_2020:P-0021711
prad_cdk12_mskcc_2020:P-0021782
prad_cdk12_mskcc_2020:P-0021853
prad_cdk12_mskcc_2020:P-0022060
prad_cdk12_mskcc_2020:P-0022865
prad_cdk12_mskcc_2020:P-0023401
prad_cdk12_mskcc_2020:P-0023594
prad_cdk12_mskcc_2020:P-0024097
prad_cdk12_mskcc_2020:P-0027082
prad_cdk12_mskcc_2020:P-0028587
prad_cdk12_mskcc_2020:P-0028775
prad_cdk12_mskcc_2020:P-0029105
prad_cdk12_mskcc_2020:P-0031812
prad_cdk12_mskcc_2020:P-0033114
prad_pik3r1_msk_2021:P-0039446
prad_pik3r1_msk_2021:P-0001426
prad_pik3r1_msk_2021:P-0006378
prad_pik3r1_msk_2021:P-0022672
prad_pik3r1_msk_2021:P-0030812
prad_pik3r1_msk_2021:P-0032801
prad_pik3r1_msk_2021:P-0047982
prad_pik3r1_msk_2021:P-0004892
prad_pik3r1_msk_2021:P-0016295
prad_pik3r1_msk_2021:P-0041429
prad_pik3r1_msk_2021:P-0052159
prad_pik3r1_msk_2021:P-0056842
prad_pik3r1_msk_2021:P-0009656
prad_pik3r1_msk_2021:P-0026447
prad_pik3r1_msk_2021:P-0048653
prad_pik3r1_msk_2021:P-0031712
prad_pik3r1_msk_2021:P-0033226
prad_pik3r1_msk_2021:P-0051484
prad_pik3r1_msk_2021:P-0021104
prad_pik3r1_msk_2021:P-0026238
prad_pik3r1_msk_2021:P-0043158
prad_pik3r1_msk_2021:P-0032194
prad_pik3r1_msk_2021:P-0044288
prad_pik3r1_msk_2021:P-0009543
prad_pik3r1_msk_2021:P-0013732
prad_pik3r1_msk_2021:P-0038198
prad_pik3r1_msk_2021:P-0043029
prad_pik3r1_msk_2021:P-0045856
prad_pik3r1_msk_2021:P-0001274
prad_pik3r1_msk_2021:P-0002149
prad_pik3r1_msk_2021:P-0006994
prad_pik3r1_msk_2021:P-0008966
prad_pik3r1_msk_2021:P-0011090
prad_pik3r1_msk_2021:P-0025044
prad_pik3r1_msk_2021:P-0057103
prad_pik3r1_msk_2021:P-0029939
prad_pik3r1_msk_2021:P-0000610
prad_pik3r1_msk_2021:P-0000935
prad_pik3r1_msk_2021:P-0001108
prad_pik3r1_msk_2021:P-0001698
prad_pik3r1_msk_2021:P-0004312
prad_pik3r1_msk_2021:P-0005454
prad_pik3r1_msk_2021:P-0006767
prad_pik3r1_msk_2021:P-0006856
prad_pik3r1_msk_2021:P-0007749
prad_pik3r1_msk_2021:P-0008074
prad_pik3r1_msk_2021:P-0008206
prad_pik3r1_msk_2021:P-0009640
prad_pik3r1_msk_2021:P-0010015
prad_pik3r1_msk_2021:P-0011096
prad_pik3r1_msk_2021:P-0013457
prad_pik3r1_msk_2021:P-0013465
prad_pik3r1_msk_2021:P-0013674
prad_pik3r1_msk_2021:P-0014004
prad_pik3r1_msk_2021:P-0014076
prad_pik3r1_msk_2021:P-0014841
prad_pik3r1_msk_2021:P-0016396
prad_pik3r1_msk_2021:P-0016812
prad_pik3r1_msk_2021:P-0017605
prad_pik3r1_msk_2021:P-0018627
prad_pik3r1_msk_2021:P-0018791
prad_pik3r1_msk_2021:P-0020984
prad_pik3r1_msk_2021:P-0021023
prad_pik3r1_msk_2021:P-0021342
prad_pik3r1_msk_2021:P-0022439
prad_pik3r1_msk_2021:P-0022700
prad_pik3r1_msk_2021:P-0023030
prad_pik3r1_msk_2021:P-0023546
prad_pik3r1_msk_2021:P-0023958
prad_pik3r1_msk_2021:P-0024598
prad_pik3r1_msk_2021:P-0024913
prad_pik3r1_msk_2021:P-0025150
prad_pik3r1_msk_2021:P-0025494
prad_pik3r1_msk_2021:P-0026808
prad_pik3r1_msk_2021:P-0028167
prad_pik3r1_msk_2021:P-0028569
prad_pik3r1_msk_2021:P-0029948
prad_pik3r1_msk_2021:P-0033660
prad_pik3r1_msk_2021:P-0034431
prad_pik3r1_msk_2021:P-0036176
prad_pik3r1_msk_2021:P-0036349
prad_pik3r1_msk_2021:P-0037029
prad_pik3r1_msk_2021:P-0037701
prad_pik3r1_msk_2021:P-0038369
prad_pik3r1_msk_2021:P-0042252
prad_pik3r1_msk_2021:P-0042583
prad_pik3r1_msk_2021:P-0042663
prad_pik3r1_msk_2021:P-0043708
prad_pik3r1_msk_2021:P-0045146
prad_pik3r1_msk_2021:P-0049886
prad_pik3r1_msk_2021:P-0050289
prad_pik3r1_msk_2021:P-0051311
prad_pik3r1_msk_2021:P-0054506
prad_pik3r1_msk_2021:P-0017491
prad_pik3r1_msk_2021:P-0000318
prad_pik3r1_msk_2021:P-0000373
prad_pik3r1_msk_2021:P-0001141
prad_pik3r1_msk_2021:P-0002364
prad_pik3r1_msk_2021:P-0002901
prad_pik3r1_msk_2021:P-0002974
prad_pik3r1_msk_2021:P-0002990
prad_pik3r1_msk_2021:P-0002999
prad_pik3r1_msk_2021:P-0003040
prad_pik3r1_msk_2021:P-0003226
prad_pik3r1_msk_2021:P-0003419
prad_pik3r1_msk_2021:P-0004482
prad_pik3r1_msk_2021:P-0004826
prad_pik3r1_msk_2021:P-0005596
prad_pik3r1_msk_2021:P-0005768
prad_pik3r1_msk_2021:P-0005806
prad_pik3r1_msk_2021:P-0006670
prad_pik3r1_msk_2021:P-0007043
prad_pik3r1_msk_2021:P-0008852
prad_pik3r1_msk_2021:P-0009374
prad_pik3r1_msk_2021:P-0009654
prad_pik3r1_msk_2021:P-0010657
prad_pik3r1_msk_2021:P-0011483
prad_pik3r1_msk_2021:P-0012030
prad_pik3r1_msk_2021:P-0012048
prad_pik3r1_msk_2021:P-0012914
prad_pik3r1_msk_2021:P-0013358
prad_pik3r1_msk_2021:P-0013936
prad_pik3r1_msk_2021:P-0014254
prad_pik3r1_msk_2021:P-0014523
prad_pik3r1_msk_2021:P-0014629
prad_pik3r1_msk_2021:P-0015209
prad_pik3r1_msk_2021:P-0015744
prad_pik3r1_msk_2021:P-0015837
prad_pik3r1_msk_2021:P-0015960
prad_pik3r1_msk_2021:P-0016405
prad_pik3r1_msk_2021:P-0016548
prad_pik3r1_msk_2021:P-0016961
prad_pik3r1_msk_2021:P-0017232
prad_pik3r1_msk_2021:P-0017262
prad_pik3r1_msk_2021:P-0017730
prad_pik3r1_msk_2021:P-0017844
prad_pik3r1_msk_2021:P-0018605
prad_pik3r1_msk_2021:P-0018713
prad_pik3r1_msk_2021:P-0019030
prad_pik3r1_msk_2021:P-0019830
prad_pik3r1_msk_2021:P-0019930
prad_pik3r1_msk_2021:P-0020111
prad_pik3r1_msk_2021:P-0020482
prad_pik3r1_msk_2021:P-0020792
prad_pik3r1_msk_2021:P-0021626
prad_pik3r1_msk_2021:P-0021673
prad_pik3r1_msk_2021:P-0021728
prad_pik3r1_msk_2021:P-0021792
prad_pik3r1_msk_2021:P-0022197
prad_pik3r1_msk_2021:P-0022782
prad_pik3r1_msk_2021:P-0023318
prad_pik3r1_msk_2021:P-0023666
prad_pik3r1_msk_2021:P-0024459
prad_pik3r1_msk_2021:P-0024538
prad_pik3r1_msk_2021:P-0026152
prad_pik3r1_msk_2021:P-0026153
prad_pik3r1_msk_2021:P-0026162
prad_pik3r1_msk_2021:P-0026202
prad_pik3r1_msk_2021:P-0026369
prad_pik3r1_msk_2021:P-0026673
prad_pik3r1_msk_2021:P-0026774
prad_pik3r1_msk_2021:P-0027210
prad_pik3r1_msk_2021:P-0027526
prad_pik3r1_msk_2021:P-0029523
prad_pik3r1_msk_2021:P-0029796
prad_pik3r1_msk_2021:P-0030521
prad_pik3r1_msk_2021:P-0031062
prad_pik3r1_msk_2021:P-0031426
prad_pik3r1_msk_2021:P-0031991
prad_pik3r1_msk_2021:P-0032027
prad_pik3r1_msk_2021:P-0033105
prad_pik3r1_msk_2021:P-0034327
prad_pik3r1_msk_2021:P-0035284
prad_pik3r1_msk_2021:P-0036007
prad_pik3r1_msk_2021:P-0036351
prad_pik3r1_msk_2021:P-0037664
prad_pik3r1_msk_2021:P-0039006
prad_pik3r1_msk_2021:P-0039234
prad_pik3r1_msk_2021:P-0040786
prad_pik3r1_msk_2021:P-0041034
prad_pik3r1_msk_2021:P-0041103
prad_pik3r1_msk_2021:P-0041945
prad_pik3r1_msk_2021:P-0043325
prad_pik3r1_msk_2021:P-0043489
prad_pik3r1_msk_2021:P-0045289
prad_pik3r1_msk_2021:P-0045358
prad_pik3r1_msk_2021:P-0048357
prad_pik3r1_msk_2021:P-0048370
prad_pik3r1_msk_2021:P-0048510
prad_pik3r1_msk_2021:P-0050123
prad_pik3r1_msk_2021:P-0050426
prad_pik3r1_msk_2021:P-0050552
prad_pik3r1_msk_2021:P-0050644
prad_pik3r1_msk_2021:P-0052970
prad_pik3r1_msk_2021:P-0053240
prad_pik3r1_msk_2021:P-0054154
prad_pik3r1_msk_2021:P-0054306
prad_pik3r1_msk_2021:P-0054521
prad_pik3r1_msk_2021:P-0017097
prad_pik3r1_msk_2021:P-0003052
prad_pik3r1_msk_2021:P-0012109
prad_pik3r1_msk_2021:P-0018607
prad_pik3r1_msk_2021:P-0036352
prad_pik3r1_msk_2021:P-0051756
prad_pik3r1_msk_2021:P-0055770
prad_pik3r1_msk_2021:P-0003101
prad_pik3r1_msk_2021:P-0008461
prad_pik3r1_msk_2021:P-0016538
prad_pik3r1_msk_2021:P-0052869
prad_pik3r1_msk_2021:P-0019624
prad_pik3r1_msk_2021:P-0032646
prad_pik3r1_msk_2021:P-0001242
prad_pik3r1_msk_2021:P-0001697
prad_pik3r1_msk_2021:P-0001768
prad_pik3r1_msk_2021:P-0003442
prad_pik3r1_msk_2021:P-0004285
prad_pik3r1_msk_2021:P-0004597
prad_pik3r1_msk_2021:P-0005047
prad_pik3r1_msk_2021:P-0005535
prad_pik3r1_msk_2021:P-0006749
prad_pik3r1_msk_2021:P-0007267
prad_pik3r1_msk_2021:P-0007313
prad_pik3r1_msk_2021:P-0007877
prad_pik3r1_msk_2021:P-0008048
prad_pik3r1_msk_2021:P-0008591
prad_pik3r1_msk_2021:P-0008812
prad_pik3r1_msk_2021:P-0009399
prad_pik3r1_msk_2021:P-0009679
prad_pik3r1_msk_2021:P-0010240
prad_pik3r1_msk_2021:P-0010523
prad_pik3r1_msk_2021:P-0011577
prad_pik3r1_msk_2021:P-0012929
prad_pik3r1_msk_2021:P-0013037
prad_pik3r1_msk_2021:P-0016288
prad_pik3r1_msk_2021:P-0016307
prad_pik3r1_msk_2021:P-0016930
prad_pik3r1_msk_2021:P-0017287
prad_pik3r1_msk_2021:P-0017376
prad_pik3r1_msk_2021:P-0017543
prad_pik3r1_msk_2021:P-0017686
prad_pik3r1_msk_2021:P-0018956
prad_pik3r1_msk_2021:P-0020132
prad_pik3r1_msk_2021:P-0020394
prad_pik3r1_msk_2021:P-0021240
prad_pik3r1_msk_2021:P-0021547
prad_pik3r1_msk_2021:P-0021782
prad_pik3r1_msk_2021:P-0021853
prad_pik3r1_msk_2021:P-0022060
prad_pik3r1_msk_2021:P-0022865
prad_pik3r1_msk_2021:P-0023401
prad_pik3r1_msk_2021:P-0023594
prad_pik3r1_msk_2021:P-0024097
prad_pik3r1_msk_2021:P-0029105
prad_pik3r1_msk_2021:P-0033832
prad_pik3r1_msk_2021:P-0034278
prad_pik3r1_msk_2021:P-0035107
prad_pik3r1_msk_2021:P-0035472
prad_pik3r1_msk_2021:P-0035807
prad_pik3r1_msk_2021:P-0035854
prad_pik3r1_msk_2021:P-0036804
prad_pik3r1_msk_2021:P-0037126
prad_pik3r1_msk_2021:P-0043581
prad_pik3r1_msk_2021:P-0044793
prad_pik3r1_msk_2021:P-0045238
prad_pik3r1_msk_2021:P-0047574
prad_pik3r1_msk_2021:P-0048085
prad_pik3r1_msk_2021:P-0048500
prad_pik3r1_msk_2021:P-0048980
prad_pik3r1_msk_2021:P-0051910
prad_pik3r1_msk_2021:P-0052272
prad_pik3r1_msk_2021:P-0053392
prad_pik3r1_msk_2021:P-0053950
prad_pik3r1_msk_2021:P-0054023
prad_pik3r1_msk_2021:P-0054214
prad_pik3r1_msk_2021:P-0054566
prad_pik3r1_msk_2021:P-0055465
prad_pik3r1_msk_2021:P-0055662
prad_mcspc_mskcc_2020:P-0016768
prad_mcspc_mskcc_2020:P-0010796
prad_mcspc_mskcc_2020:P-0001426
prad_mcspc_mskcc_2020:P-0020218
prad_mcspc_mskcc_2020:P-0028167
prad_mcspc_mskcc_2020:P-0009640
prad_mcspc_mskcc_2020:P-0016405
prad_mcspc_mskcc_2020:P-0008682
prad_mcspc_mskcc_2020:P-0022672
prad_mcspc_mskcc_2020:P-0004892
prad_mcspc_mskcc_2020:P-0009656
prad_mcspc_mskcc_2020:P-0002334
prad_mcspc_mskcc_2020:P-0026409
prad_mcspc_mskcc_2020:P-0009687
prad_mcspc_mskcc_2020:P-0000888
prad_mcspc_mskcc_2020:P-0014438
prad_mcspc_mskcc_2020:P-0025044
prad_mcspc_mskcc_2020:P-0002123
prad_mcspc_mskcc_2020:P-0005454
prad_mcspc_mskcc_2020:P-0007749
prad_mcspc_mskcc_2020:P-0013674
prad_mcspc_mskcc_2020:P-0014004
prad_mcspc_mskcc_2020:P-0016396
prad_mcspc_mskcc_2020:P-0022439
prad_mcspc_mskcc_2020:P-0022700
prad_mcspc_mskcc_2020:P-0023249
prad_mcspc_mskcc_2020:P-0023276
prad_mcspc_mskcc_2020:P-0025150
prad_mcspc_mskcc_2020:P-0025494
prad_mcspc_mskcc_2020:P-0026808
prad_mcspc_mskcc_2020:P-0030801
prad_mcspc_mskcc_2020:P-0001141
prad_mcspc_mskcc_2020:P-0002974
prad_mcspc_mskcc_2020:P-0005045
prad_mcspc_mskcc_2020:P-0007547
prad_mcspc_mskcc_2020:P-0010178
prad_mcspc_mskcc_2020:P-0011483
prad_mcspc_mskcc_2020:P-0012030
prad_mcspc_mskcc_2020:P-0012048
prad_mcspc_mskcc_2020:P-0013729
prad_mcspc_mskcc_2020:P-0014629
prad_mcspc_mskcc_2020:P-0014686
prad_mcspc_mskcc_2020:P-0015209
prad_mcspc_mskcc_2020:P-0016733
prad_mcspc_mskcc_2020:P-0019030
prad_mcspc_mskcc_2020:P-0020792
prad_mcspc_mskcc_2020:P-0021728
prad_mcspc_mskcc_2020:P-0025138
prad_mcspc_mskcc_2020:P-0026673
prad_mcspc_mskcc_2020:P-0026774
prad_mcspc_mskcc_2020:P-0031062
prad_mcspc_mskcc_2020:P-0031426
prad_mcspc_mskcc_2020:P-0032799
prad_mcspc_mskcc_2020:P-0033105
prad_mcspc_mskcc_2020:P-0017097
prad_mcspc_mskcc_2020:P-0001242
prad_mcspc_mskcc_2020:P-0001768
prad_mcspc_mskcc_2020:P-0004285
prad_mcspc_mskcc_2020:P-0004597
prad_mcspc_mskcc_2020:P-0005535
prad_mcspc_mskcc_2020:P-0005571
prad_mcspc_mskcc_2020:P-0007267
prad_mcspc_mskcc_2020:P-0007313
prad_mcspc_mskcc_2020:P-0007332
prad_mcspc_mskcc_2020:P-0007734
prad_mcspc_mskcc_2020:P-0007930
prad_mcspc_mskcc_2020:P-0008383
prad_mcspc_mskcc_2020:P-0008812
prad_mcspc_mskcc_2020:P-0009399
prad_mcspc_mskcc_2020:P-0009448
prad_mcspc_mskcc_2020:P-0010529
prad_mcspc_mskcc_2020:P-0011577
prad_mcspc_mskcc_2020:P-0013526
prad_mcspc_mskcc_2020:P-0014299
prad_mcspc_mskcc_2020:P-0015452
prad_mcspc_mskcc_2020:P-0017543
prad_mcspc_mskcc_2020:P-0018812
prad_mcspc_mskcc_2020:P-0021711
prad_mcspc_mskcc_2020:P-0023401
prad_mcspc_mskcc_2020:P-0028587
prad_mskcc:PCA0180
prad_mskcc:PCA0130
prad_mskcc:PCA0190
prad_mskcc:PCA0156
prad_mskcc:PCA0144
prad_mskcc:PCA0128
prad_mskcc:PCA0114
prad_mskcc:PCA0211
prad_mskcc:PCA0194
prad_mskcc:PCA0206
prad_mskcc:PCA0038
prad_mskcc:PCA0104
prad_mskcc:PCA0182
prad_mskcc:PCA0184
prad_mskcc:PCA0171
prad_mskcc:PCA0073
prad_mskcc:PCA0083
prostate_dkfz_2018:ICGC_PCA038
prostate_dkfz_2018:ICGC_PCA041
prostate_dkfz_2018:ICGC_PCAL05
prostate_dkfz_2018:ICGC_PCAL43
nepc_wcm_2016:WCMC15
nepc_wcm_2016:WCMC198
nepc_wcm_2016:WCMC10363
nepc_wcm_2016:WCMC12688
