# Supplementary material for: How clinically relevant and inclusive are prostate cell lines?
Source: Research Square preprint supplement (doi:10.21203/rs.3.rs-6355469/v1), 2025-05-07
Supplement: Supplementary file 3 [file 959f20a3179d7c0111cfe270.docx]

| **Cell Line** | **ATCC and/or Source** | **References** |
| --- | --- | --- |
| LNCaP | Julius Horoszewicz (Roswell Park Memorial Institute, Buffalo, NY, USA) | (1) |
| PC-3 | ATCC (CRL-1435) | (2) |
| DU145 | ATCC (HTB-81) | (3) |
| 1013 L | Anita Bilström (Active Biotech Research AB, Lund, Sweden) | (4) |
| 22Rv1 | ATCC (CRL-2505) James Jacobberger (Case Western Reserve University, Cleveland, OH, USA) | (5) |
| VCaP | ATCC (CRL-2876) Kenneth Pienta (University of Michigan, Ann Arbor, MI, USA) | (6) |
| MDA PCa 1 | Nora Navone (University of Texas, Houston, TX, USA) | (7) |
| CWR22 | NCI Division of Cancer Treatment and Diagnosis (DCTD) Tumour Repository | (8) |
| LAPC-4(LAPC-4-1) | Charles Sawyer (University of California, Los Angeles, CA, USA) | (9) |
| LNCaP-C4 | ATCC (CRL-3313) | (10) |
| MDA Pca 2b | ATCC (CRL-2422), Nora Navone (University of Texas, Houston, TX, USA) | (11) |
| PPC-1 | No authentic stock is known | (12) |
| LNCaP-C4-2 | ATCC (CRL-3315) | (10) |
| ARCaP | Haiyen Zhau (University of Virginia, Charlottesville, VA, USA) | (7) |
| LNCaP-FGC | ATCC (CRL-1740) | (13) |
| PZ-HPV-7 | ATCC (CRL-2221) | (14) |
| PWR-1E | ATCC (CRL-11611) | (15) |
| DuCaP | Kenneth Pienta (University of Michigan, Ann Arbor, MI, USA) | (16) |
| CWR-R1 | Christopher Gregory (University of North Carolina, Chapel Hill, NC, USA | (17) |
| ALVA-31 | No authentic stock is known | (18) |
| RWPE-2 | ATCC (CRL-11610) | (19) |
| CA-HPV-10 | ATCC (CRL-2220) | (14) |
| MDA Pca 2a | Nora Navone (University of Texas, Houston, TX, USA) | (11) |
| PSK-1 | Chol Jang Kim (Shiga University of Medical Science, Ottsu, Japan) | (20) |
| PC-93 | Gert Jan van Steenbrugge (Erasmus University, Rotterdam, Netherlands) | (21) |
| ALVA-41 | No authentic stock is known | (22) |
| PC-346C | Wytske van Weerden (Erasmus University, Rotterdam, Netherlands) | (23) |
| E006AA | Walter Rayford (Louisiana State University-Health Sciences Center, New Orleans, LA, USA) | (24) |
| NCI-H660 | ATCC (CRL-5813) | (25) |
| P69SV40T | No authentic stock is known | (26) |
| ALVA-101 | Steven Loop (American Lake Veterans Administration Hospital, Tacoma, WA, USA) | (22) |
| DuPro-1 | William Isaacs (Johns Hopkins University, Baltimore, MA, USA) | (27) |
| WPMY-1 normal prostatic myofibroblasts | ATCC (CRL-2854) | (28) |
| UM-SCP-1 | Herb Barton Grossman (University of Texas, Houston, TX, USA) | (29) |
| LAPC-3 | No authentic stock is known | (9) |
| RC-77T/E | Clayton Yates (Tuskegee University, Tuskegee, AL, USA) | (30) |
| ALVA-55 | Steven Loop (American Lake Veterans Administration Hospital, Tacoma, WA, USA) | (31) |
| KuCaP13 | No authentic stock is known | (32) |
| LASCPC-01 | ATCC (CRL-3356) Owen N. Witte (University of California, Los Angeles, CA, USA) | (33) |
| hTERT EP156T | ATCC (CRL-3289) | (34) |
| LNCaP-LN-3 | Korean Cell Line Bank 80018 | (35) |
| PNF-08 | Gerhard Unteregger (University of Saarland Medical School, Germany) | (36) |
| LAPC9 | Noah Craft (Department of Medicine, Molecular Biology Institute, University of California, Los Angeles, USA) | (37) |
| LNCaP104S | John Kokontis (Ben May Institute, University of Chicago, Illinois, USA) | (38) |
| LuCAP35 | Eva Corey (Department of Urology, University of Washington, Seattle, Washington 98195, USA | (39) |
| ACRJ-PC28 | The University of the West Indies, Mona, Kingston, Jamaica, West Indies | (40) |

**Supplementary Table 1**: Prostate cancer cell lines analysed in this study.

| **cBioPortal Name** | **Number of samples** | **Number of patients** |
| --- | --- | --- |
| Race Differences in Prostate Cancer  (MSK, 2021) (41) | 2448 | 2435 |
| Prostate Cancer  (MSK, JCO Precis Oncol 2017) (42) | 504 | 401 |
| Prostate Adenocarcinoma  (TCGA, Firehose Legacy) (43) | 501 | 500 |
| Prostate Adenocarcinoma (MSK/DFCI, Nature Genetics 2018) (44) | 1013 | 1013 |
| Prostate Adenocarcinoma  (MSK, Eur Urol 2020) (45) | 1465 | 1465 |
| Prostate Adenocarcinoma  (MSK, Clin Cancer Res. 2022) (46) | 1417 | 1417 |
| Metastatic Prostate Adenocarcinoma (SU2C/PCF Dream Team, PNAS 2019) (47) | 444 | 429 |
| Neuroendocrine Prostate Cancer  (Multi-Institute, Nat Med 2016) | 114 | 81 |
| Metastatic castration-sensitive prostate cancer  (MSK, Clin Cancer Res 2020) (48) | 424 | 424 |
| Prostate Adenocarcinoma  (MSK, Cancer Cell 2010) (49) | 240 | 238 |
| Prostate Cancer  (DKFZ, Cancer Cell 2018) (50) | 324 | 292 |

**Supplementary Table 2:** Clinical cohorts accessed on cBioPortal used in this study.

| **Variable** | **Source** | **Data available, n (%)** |
| --- | --- | --- |
| Number of citations | Ovid MEDLINE  Web Of Science Core Collection | 45 (100) |
| Number of patents | World Intellectual Property PATENTSCOPE database | 45 (100) |
| Anatomical Location of sample collection | Original cell line papers (18, 19, 21-57), Cellosaurus website, ATCC website, COSMIC database | 45 (100) |
| Patient age at sample collection | Original cell line papers (18, 19, 21-57), Cellosaurus website, ATCC website, COSMIC database | 27 (60) |
| Geographical location of sample collection | Original cell line papers (18, 19, 21-57) | 45 (100) |

**Supplementary Table 3:** Baseline characteristics investigated for each cell line, COSMIC = Catalogue of Somatic Mutations in Cancer

| **Cell Line** | **Data Available**  Supplementary Table 1 | **Data not available** | **Cell Line** | **Data Available** | **Data not available** |
| --- | --- | --- | --- | --- | --- |
| All | Year of sample collection  Number of citations  Number of patents  Anatomical location of sample collection  Cancer Type |  | DuCaP | Age at sample collection  COSMIC data  Ethnicity  M stage | CCLE data  MSI  Gleason grade |
| LNCaP | Age at sample collection  COSMIC data  MSI  Ethnicity  M stage | CCLE data  Gleason grade | CWR-R1 | Ethnicity  M stage | Age at sample collection  COSMIC data  CCLE data  MSI  Gleason grade |
| PC-3 | Age at sample collection  COSMIC data  CCLE data  MSI  Ethnicity  M stage | Gleason grade | ALVA-31 | Age at sample collection  Ethnicity  M stage | COSMIC data  CCLE data  MSI  Gleason grade |
| DU145 | Age at sample collection  COSMIC data  CCLE data  MSI  Ethnicity  M stage | Gleason grade | RWPE-2 | Age at sample collection  Ethnicity  Gleason grade  M stage | COSMIC data  CCLE data  MSI |
| 1013 L | COSMIC data  MSI  Ethnicity | Age at sample collection  CCLE data  Gleason grade  M stage | CA-HPV-10 | Age at sample collection  Ethnicity  Gleason grade  M stage | COSMIC data  CCLE data  MSI |
| 22Rv1 | COSMIC data  CCLE data  Ethnicity  Gleason grade | Age at sample collection  MSI  M stage | MDA Pca 2a | Age at sample collection  Ethnicity  M stage | COSMIC data  CCLE data  MSI  Gleason grade |
| VCaP | Age at sample collection  COSMIC data  CCLE data  MSI  Ethnicity  M stage | Gleason grade | PSK-1 | Age at sample collection  Ethnicity  M stage | COSMIC data  CCLE data  MSI  Gleason grade |
| MDA PCa 1 | Age at sample collection  MSI  Ethnicity  M stage | COSMIC data  CCLE data  MSI  Gleason grade | PC-93 | Age at sample collection  Ethnicity  M stage | COSMIC data  CCLE data  MSI  Gleason grade |
| CWR22 | COSMIC data  MSI  Ethnicity  Gleason grade  M stage | Age at sample collection  CCLE data | ALVA-41 | Age at sample collection  Ethnicity  M stage | COSMIC data  CCLE data  MSI  Gleason grade |
| LAPC-4(LAPC-4-1) | COSMIC data  M stage | Age at sample collection  CCLE data  MSI  Ethnicity  Gleason grade | PC-346C | Gleason grade  M stage | Age at sample collection  COSMIC data  CCLE data  MSI  Ethnicity |
| LNCaP-C4 | Age at sample collection  Ethnicity  M stage | COSMIC data  CCLE data  MSI  Gleason grade | E006AA | Age at sample collection  Ethnicity  Gleason grade  M stage | COSMIC data  CCLE data  MSI |
| MDA Pca 2b | Age at sample collection  COSMIC data  CCLE data  MSI  Ethnicity  M stage | Gleason grade | NCI-H660 | Age at sample collection  COSMIC data  CCLE data  MSI  Ethnicity  M stage | Gleason grade |
| PPC-1 | Age at sample collection  COSMIC data  Ethnicity | CCLE data  MSI  Gleason grade  M stage | P69SV40T | Age at sample collection  COSMIC data  Ethnicity  Gleason grade  M stage | CCLE data  MSI |
| LNCaP-C4-2 | Age at sample collection  Ethnicity  M stage | COSMIC data  CCLE data  MSI  Gleason grade | ALVA-101 | Age at sample collection  Ethnicity  M stage | COSMIC data  CCLE data  MSI  Gleason grade |
| ARCaP | Age at sample collection  Ethnicity  M stage | COSMIC data  CCLE data  MSI  Gleason grade | DuPro-1 | Age at sample collection  Ethnicity  Gleason grade  M stage | COSMIC data  CCLE data  MSI |
| LNCaP-FGC | Age at sample collection  COSMIC data  CCLE data  MSI  Ethnicity  M stage | Gleason grade | WPMY-1 normal prostatic myofibroblasts | Age at sample collection  Ethnicity  Gleason grade  M stage | COSMIC data  CCLE data  MSI |
| PZ-HPV-7 | Age at sample collection  Ethnicity  Gleason grade  M stage | COSMIC data  CCLE data  MSI | UM-SCP-1 | Age at sample collection  Ethnicity  M stage | COSMIC data  CCLE data  MSI  Gleason grade |
| PWR-1E | Age at sample collection  MSI  Ethnicity  Gleason grade  M stage | COSMIC data  CCLE data | PNF-08 | Ethnicity  Gleason grade  M stage | Age at sample collection  COSMIC data  CCLE data |
| ALVA-55 | Age at sample collection  Ethnicity  M stage | COSMIC data  CCLE data  MSI  Gleason grade | LAPC9 | COSMIC data  M stage | Age at sample collection  CCLE data  MSI  Ethnicity  Gleason grade |
| KuCaP13 | Age at sample collection  Ethnicity  M stage | COSMIC data  CCLE data  MSI  Gleason grade | LNCaP104S | Age at sample collection  COSMIC data  Ethnicity  M stage | CCLE data  MSI  Gleason grade |
| LASCPC-01 | Age at sample collection  MSI  Ethnicity  M stage | COSMIC data  CCLE data  Gleason grade | LuCAP35 | Age at sample collection  COSMIC data  Ethnicity  M stage | CCLE data  MSI  Gleason grade |
| hTERT EP156T | Age at sample collection  Gleason grade  M stage | COSMIC data  CCLE data  MSI  Ethnicity | LAPC-3 | COSMIC data  M stage | Age at sample collection  CCLE data  MSI  Ethnicity  Gleason grade |
| LNCaP-LN-3 | Age at sample collection  Ethnicity  M stage | COSMIC data  CCLE data  MSI | RC-77T/E | Age at sample collection  Ethnicity  Gleason grade  M stage | COSMIC data  CCLE data  MSI |
| ACRJ-PC28 | Age at sample collection  Ethnicity  M stage  Gleason grade | CCLE data  COSMIC data  MSI |  | | |

**Supplementary Table 4** : Data available for each cell line

| **Variable** | **Source** |
| --- | --- |
| Patient age at sample collection (radical prostatectomy) | Systematic Review on robotic-assisted radical prostatectomy (51) |
| Geographical distribution of prostate cancer (incidence) | GCO, IARC, WHO Cancer Today Website (52, 53, 54) |
| Ethnicity of prostate cancer patients | JAMA worldwide racial demographics of prostate cancer study and SEER database (55) |
| Gleason grade of prostate cancer patients | Weerakoon et. al The current use of active surveillance in an Australian cohort of men (56) |
| Prostate cancer type | Ackerman et.al Prostate surgical pathology (57) |

**Supplementary Table 5**: Sources of worldwide Prostate Cancer data. GCO = Global Cancer Observatory, IARC = International Agency for Research on Cancer, WHO = World Health Organization. JAMA = The Journal of the American Medical Association, SEER = The Surveillance, Epidemiology, and End Results Program.

| **Variable** | **Variable Type** | **Variable options detailed** |
| --- | --- | --- |
| Mutation | Categorical | Missense mutation  Truncating mutation  Inframe mutation  Splice |
| Copy Number Alteration | Categorical | Amplification  Deletion |
| Structural Variant | Categorical | Fusion |
| mRNA expression | Continuous | Low (Z score <2 relative to rest of cohort)  High (Z score>2 relative to rest of cohort) |
| Protein expression | Continuous | Low (Z score <2 relative to rest of cohort)  High (Z score >2 relative to rest of cohort) |
| Microsatellite Instability | Categorical | Stable  Instable |

**Supplementary Table 6:** Biological variables investigated for each cell line.

| **Cell Line** | **Patients with one alteration the same**  **N (%)** | **Patients with 2-4 alterations the same**  **N (%)** | **Patients with 5-6 alterations the same**  **N (%)** |
| --- | --- | --- | --- |
| NCIH660 | 1299 (90.21) | 141 (9.79) | 0 (0) |
| VCaP | 1897 (74.71) | 625 (24.62) | 17 (0.67) |
| MDA PCA 2b | 661 (82.94) | 134 (16.81) | 2 (0.25) |
| DU145 | 1408 (87.95) | 193 (12.05) | 0 (0) |
| LNCaP-FGC | 1738 (82.02) | 380 (19.93) | 1 (0.05) |
| 22Rv1 | 1462 (84.95) | 256 (14.88) | 3 (0.17) |
| PC-3 | 1352 (83.92) | 258 (16.02) | 1 (0.06) |

**Supplementary Table 7**: Number of patients with alterations the same as cell line

| **Cell Line** | **Age at sample collection** | **Anatomical location of sample collection** | **Ethnicity** | **Cancer type** | **Androgen independent**  **or sensitive (AI/AS)** |
| --- | --- | --- | --- | --- | --- |
| LNCaP | 50 | Left supraclavicular lymph node | White | Prostate adenocarcinoma | AS |
| PC-3 | 62 | Lumbar vertebrae | White | Prostate adenocarcinoma | AI |
| DU145 | 69 | Brain | White | Prostate adenocarcinoma | AI |
| 1013 L | NA | Prostate | White | Non-acinar urothelial prostate carcinoma | AI |
| 22Rv1 | NA | Prostate | Mixed | Prostate adenocarcinoma | AI |
| VCaP | 59 | Spinal cord | White | Prostate adenocarcinoma | AI |
| MDA PCa 1 | 63 | Ascites | Black | Prostate adenocarcinoma | AI |
| CWR22 | NA | Prostate | Mixed | Prostate adenocarcinoma | AI |
| LAPC-4(LAPC-4-1) | NA | Lymph node | NA | Prostate adenocarcinoma | AI |
| LNCaP-C4 | 50 | Left supraclavicular lymph node | White | Prostate adenocarcinoma | AI |
| MDA Pca 2b | 63 | Bone | Black | Prostate adenocarcinoma | AI |
| PPC-1 | 62 | Prostate | White | Prostate adenocarcinoma | AI |
| LNCaP-C4-2 | 50 | Left supraclavicular lymph node | White | Prostate adenocarcinoma | AI |
| ARCaP | 83 | Ascites | White | Prostate adenocarcinoma | AI |
| LNCaP-FGC | 50 | Left supraclavicular lymph node | White | Prostate adenocarcinoma | AS |
| PZ-HPV-7 | 70 | Prostate | White | Prostate adenocarcinoma | AS |
| PWR-1E | 67 | Prostate | White | Prostate adenocarcinoma | AS |
| DuCaP | 59 | Dura mater | White | Prostate adenocarcinoma | AS |
| CWR-R1 | NA | Prostate | NA | Prostate adenocarcinoma | AI |
| ALVA-31 | 62 | Prostate | White | Prostate adenocarcinoma | AS |
| RWPE-2 | 54 | Prostate | White | Normal prostate | AS |
| CA-HPV-10 | 63 | Prostate | White | Prostate adenocarcinoma | AI |
| MDA Pca 2a | 63 | Ascites | Black | Prostate adenocarcinoma | AI |
| PSK-1 | 29 | Prostate | Asian | Small cell carcinoma | AI |
| PC-93 | 30.5 | Prostate | Black | Prostate adenocarcinoma | AS |
| ALVA-41 | 62 | Bone | White | Prostate adenocarcinoma | AS |
| PC-346C | NA | Prostate | NA | Prostate adenocarcinoma | AI |
| E006AA | 58 | Prostate | Black | Prostate adenocarcinoma | AS |
| NCI-H660 | 63 | Prostate | White | Small cell carcinoma | AI |
| P69SV40T | 63 | Prostate | Black | Normal prostate | NA |
| ALVA-101 | 62 | Bone | White | Prostate adenocarcinoma | AS |
| DuPro-1 | 62 | Prostate | White | Prostate adenocarcinoma | AI |
| WPMY-1 normal prostatic myofibroblasts | 54 | Prostate | White | Normal prostate | AS |
| UM-SCP-1 | 71 | Prostate | White | Squamous cell carcinoma | AI |
| LAPC-3 | NA | Prostate | NA | Prostate adenocarcinoma | AI |
| RC-77T/E | 63 | Prostate | Black | Prostate adenocarcinoma | AS |
| ALVA-55 | 62 | Lymph node | White | Prostate adenocarcinoma | AI |
| KuCaP13 | 60 | Penis | Asian | Neuroendocrine carcinoma | AI |
| LASCPC-01 | 75-80 | Prostate | White | Neuroendocrine carcinoma | AI |
| hTERT EP156T | 66 | Prostate | NA | Prostate adenocarcinoma | AS |
| LNCaP-LN-3 | 50 | Left supraclavicular lymph node | White | Prostate adenocarcinoma | AS |
| PNF-08 | NA | Prostate | White | Normal prostate | AS |
| LAPC9 | NA | Bone | NA | Prostate adenocarcinoma | AI |
| LNCaP104S | 50 | Left supraclavicular lymph node | White | Prostate adenocarcinoma | AS |
| LuCAP35 | 66 | Left inguinal lymph node | White | Prostate adenocarcinoma | AS |
| ACRJ-PC28 | 69 | Prostate | Black | Prostate adenocarcinoma | AS |

**Supplementary Table 8** : Key clinical variables for each cell line

|  | **Cell Line**  **p value** | **Clinical cohort**  **p value** | **Worldwide**  **p value** |
| --- | --- | --- | --- |
| D’Agostino &Pearson Test | <0.0001 | 0.2983 (ns) | <0.0001 |
| Anderson-Darling test | 0.0015 | 0.0549 (ns) | <0.0001 |
| Shapiro-Wilkins test | 0.0008 | 0.0384 | <0.0001 |
| Kolmogorov-Smirnov test | 0.0181 | >0.100 (ns) | <0.0001 |

**Supplementary Table 9**: Results of normality distribution tests for distribution of age at sample collection.

| **Treatment** | **Clinical Cohort (%)** | **Cell Line (%)** |
| --- | --- | --- |
| No treatment | 8.99 | 30.40 |
| ADT | 1.45 | 30.40 |
| Chemotherapy | 0.59 | 13.04 |
| Unknown | 88.97 | 28.26 |

**Supplementary Table 10**: Table demonstrating percentage of cell lines, or patients receiving different forms of treatment for prostate cancer prior to sampling

| **cBioPortal Name** | **mRNA Expression** | **Protein Expression** | **Mutations** | **Copy Number Alterations** | **Structural Variants** | **Microsatellite Instability** |
| --- | --- | --- | --- | --- | --- | --- |
| Race Differences in Prostate Cancer  (MSK, 2021) (41) | ✓ |  | ✓ | ✓ | ✓ |  |
| Prostate Cancer  (MSK, JCO Precis Oncol 2017) (42) |  |  | ✓ | ✓ | ✓ |  |
| Prostate Adenocarcinoma  (TCGA, Firehose Legacy) (43) | ✓ | ✓ | ✓ | ✓ |  |  |
| Prostate Adenocarcinoma (MSK/DFCI, Nature Genetics 2018) (44) | ✓ | ✓ | ✓ | ✓ |  |  |
| Prostate Adenocarcinoma  (MSK, Eur Urol 2020) (45) |  |  | ✓ | ✓ | ✓ | ✓ |
| Prostate Adenocarcinoma  (MSK, Clin Cancer Res. 2022) (46) |  |  | ✓ | ✓ | ✓ | ✓ |
| Metastatic Prostate Adenocarcinoma (SU2C/PCF Dream Team, PNAS 2019) (47) | ✓ |  | ✓ | ✓ | ✓ |  |
| Neuroendocrine Prostate Cancer  (Multi-Institute, Nat Med 2016) | ✓ |  | ✓ |  |  |  |
| Metastatic castration-sensitive prostate cancer  (MSK, Clin Cancer Res 2020) (48) |  |  | ✓ | ✓ | ✓ | ✓ |
| Prostate Adenocarcinoma  (MSK, Cancer Cell 2010) (49) | ✓ |  | ✓ | ✓ |  |  |
| Prostate Cancer  (DKFZ, Cancer Cell 2018) (50) | ✓ |  | ✓ |  |  |  |

**Supplementary Table 11**: Biological alterations screened for in clinical cohorts accessed on cBioPortal.

1. Horoszewicz JS, Leong SS, Chu TM, Wajsman ZL, Friedman M, Papsidero L, et al. The LNCaP cell line--a new model for studies on human prostatic carcinoma. Prog Clin Biol Res. 1980;37:115-32.

2. Kaighn ME, Lechner JF, Narayan KS, Jones LW. Prostate carcinoma: tissue culture cell lines. Natl Cancer Inst Monogr. 1978(49):17-21.

3. Stone KR, Mickey DD, Wunderli H, Mickey GH, Paulson DF. Isolation of a human prostate carcinoma cell line (DU 145). Int J Cancer. 1978;21(3):274-81.

4. Williams RD. Human urologic cancer cell lines. Invest Urol. 1980;17(5):359-63.

5. Sramkoski RM, Pretlow TG, 2nd, Giaconia JM, Pretlow TP, Schwartz S, Sy MS, et al. A new human prostate carcinoma cell line, 22Rv1. In Vitro Cell Dev Biol Anim. 1999;35(7):403-9.

6. Korenchuk S, Lehr JE, L MC, Lee YG, Whitney S, Vessella R, et al. VCaP, a cell-based model system of human prostate cancer. In Vivo. 2001;15(2):163-8.

7. Zhau HY, Chang SM, Chen BQ, Wang Y, Zhang H, Kao C, et al. Androgen-repressed phenotype in human prostate cancer. Proc Natl Acad Sci U S A. 1996;93(26):15152-7.

8. Pretlow TG, Wolman SR, Micale MA, Pelley RJ, Kursh ED, Resnick MI, et al. Xenografts of primary human prostatic carcinoma. J Natl Cancer Inst. 1993;85(5):394-8.

9. Klein KA, Reiter RE, Redula J, Moradi H, Zhu XL, Brothman AR, et al. Progression of metastatic human prostate cancer to androgen independence in immunodeficient SCID mice. Nat Med. 1997;3(4):402-8.

10. Wu HC, Hsieh JT, Gleave ME, Brown NM, Pathak S, Chung LW. Derivation of androgen-independent human LNCaP prostatic cancer cell sublines: role of bone stromal cells. Int J Cancer. 1994;57(3):406-12.

11. Navone NM, Olive M, Ozen M, Davis R, Troncoso P, Tu SM, et al. Establishment of two human prostate cancer cell lines derived from a single bone metastasis. Clin Cancer Res. 1997;3(12 Pt 1):2493-500.

12. Brothman AR, Lesho LJ, Somers KD, Wright GL, Jr., Merchant DJ. Phenotypic and cytogenetic characterization of a cell line derived from primary prostatic carcinoma. Int J Cancer. 1989;44(5):898-903.

13. Carroll AG, Voeller HJ, Sugars L, Gelmann EP. p53 oncogene mutations in three human prostate cancer cell lines. Prostate. 1993;23(2):123-34.

14. Weijerman PC, König JJ, Wong ST, Niesters HG, Peehl DM. Lipofection-mediated immortalization of human prostatic epithelial cells of normal and malignant origin using human papillomavirus type 18 DNA. Cancer Res. 1994;54(21):5579-83.

15. Webber MM, Bello D, Kleinman HK, Wartinger DD, Williams DE, Rhim JS. Prostate specific antigen and androgen receptor induction and characterization of an immortalized adult human prostatic epithelial cell line. Carcinogenesis. 1996;17(8):1641-6.

16. Lee YG, Korenchuk S, Lehr J, Whitney S, Vessela R, Pienta KJ. Establishment and characterization of a new human prostatic cancer cell line: DuCaP. In Vivo. 2001;15(2):157-62.

17. Gregory CW, Johnson RT, Jr., Mohler JL, French FS, Wilson EM. Androgen receptor stabilization in recurrent prostate cancer is associated with hypersensitivity to low androgen. Cancer Res. 2001;61(7):2892-8.

18. Loop SM, Rozanski TA, Ostenson RC. Human primary prostate tumor cell line, ALVA-31: a new model for studying the hormonal regulation of prostate tumor cell growth. Prostate. 1993;22(2):93-108.

19. Webber MM, Bello D, Quader S. Immortalized and tumorigenic adult human prostatic epithelial cell lines: characteristics and applications Part 2. Tumorigenic cell lines. Prostate. 1997;30(1):58-64.

20. Kim CJ, Kushima R, Okada Y, Seto A. Establishment and characterization of a prostatic small-cell carcinoma cell line (PSK-1) derived from a patient with Klinefelter syndrome. Prostate. 2000;42(4):287-94.

21. Claas FH, van Steenbrugge GJ. Expression of HLA-like structures on a permanent human tumor line PC-93. Tissue Antigens. 1983;21(3):227-32.

22. Plymate SR, Loop SM, Hoop RC, Wiren KM, Ostenson R, Hryb DJ, et al. Effects of sex hormone binding globulin (SHBG) on human prostatic carcinoma. J Steroid Biochem Mol Biol. 1991;40(4-6):833-9.

23. Romijn J.C. E-SS, van Weerden W.M., Teubel W., Trapman J., Schroder F.H. Development and characterization of a new in vitro model to study the mechanisms of prostate cancer progression. Urol Res. 1995;23:P81-265.

24. Koochekpour S, Maresh GA, Katner A, Parker-Johnson K, Lee TJ, Hebert FE, et al. Establishment and characterization of a primary androgen-responsive African-American prostate cancer cell line, E006AA. Prostate. 2004;60(2):141-52.

25. Carney DN, Gazdar AF, Bepler G, Guccion JG, Marangos PJ, Moody TW, et al. Establishment and identification of small cell lung cancer cell lines having classic and variant features. Cancer Res. 1985;45(6):2913-23.

26. Bae VL, Jackson-Cook CK, Brothman AR, Maygarden SJ, Ware JL. Tumorigenicity of SV40 T antigen immortalized human prostate epithelial cells: association with decreased epidermal growth factor receptor (EGFR) expression. Int J Cancer. 1994;58(5):721-9.

27. Gingrich JR, Tucker JA, Walther PJ, Day JW, Poulton SH, Webb KS. Establishment and characterization of a new human prostatic carcinoma cell line (DuPro-1). J Urol. 1991;146(3):915-9.

28. Webber MM, Trakul N, Thraves PS, Bello-DeOcampo D, Chu WW, Storto PD, et al. A human prostatic stromal myofibroblast cell line WPMY-1: a model for stromal-epithelial interactions in prostatic neoplasia. Carcinogenesis. 1999;20(7):1185-92.

29. Grossman HB, Wedemeyer G, Ren L, Carey TE. UM-SCP-1, a new human cell line derived from a prostatic squamous cell carcinoma. Cancer Res. 1984;44(9):4111-7.

30. Theodore S, Sharp S, Zhou J, Turner T, Li H, Miki J, et al. Establishment and characterization of a pair of non-malignant and malignant tumor derived cell lines from an African American prostate cancer patient. Int J Oncol. 2010;37(6):1477-82.

31. Mehta PP, Lokeshwar BL, Schiller PC, Bendix MV, Ostenson RC, Howard GA, et al. Gap-junctional communication in normal and neoplastic prostate epithelial cells and its regulation by cAMP. Mol Carcinog. 1996;15(1):18-32.

32. Okasho K, Mizuno K, Fukui T, Lin YY, Kamiyama Y, Sunada T, et al. Establishment and characterization of a novel treatment-related neuroendocrine prostate cancer cell line KUCaP13. Cancer Sci. 2021;112(7):2781-91.

33. Lee JK, Phillips JW, Smith BA, Park JW, Stoyanova T, McCaffrey EF, et al. N-Myc Drives Neuroendocrine Prostate Cancer Initiated from Human Prostate Epithelial Cells. Cancer Cell. 2016;29(4):536-47.

34. Kogan I, Goldfinger N, Milyavsky M, Cohen M, Shats I, Dobler G, et al. hTERT-immortalized prostate epithelial and stromal-derived cells: an authentic in vitro model for differentiation and carcinogenesis. Cancer Res. 2006;66(7):3531-40.

35. Pettaway CA, Pathak S, Greene G, Ramirez E, Wilson MR, Killion JJ, et al. Selection of highly metastatic variants of different human prostatic carcinomas using orthotopic implantation in nude mice. Clin Cancer Res. 1996;2(9):1627-36.

36. Szczyrba J, Löprich E, Wach S, Jung V, Unteregger G, Barth S, et al. The microRNA profile of prostate carcinoma obtained by deep sequencing. Mol Cancer Res. 2010;8(4):529-38.

37. Craft N, Chhor C, Tran C, Belldegrun A, DeKernion J, Witte ON, et al. Evidence for clonal outgrowth of androgen-independent prostate cancer cells from androgen-dependent tumors through a two-step process. Cancer Res. 1999;59(19):5030-6.

38. Kokontis J, Takakura K, Hay N, Liao S. Increased androgen receptor activity and altered c-myc expression in prostate cancer cells after long-term androgen deprivation. Cancer Res. 1994;54(6):1566-73.

39. Corey E, Quinn JE, Buhler KR, Nelson PS, Macoska JA, True LD, et al. LuCaP 35: a new model of prostate cancer progression to androgen independence. Prostate. 2003;55(4):239-46.

40. Valentine H, Aiken W, Morrison B, Zhao Z, Fowle H, Wasserman JS, et al. Expanding the Prostate Cancer Cell Line Repertoire with ACRJ-PC28, an AR-negative Neuroendocrine Cell Line Derived From an African-Caribbean Patient. Cancer Research Communications. 2022;2(11):1355-71.

41. Stopsack KH, Nandakumar S, Arora K, Nguyen B, Vasselman SE, Nweji B, et al. Differences in Prostate Cancer Genomes by Self-reported Race: Contributions of Genetic Ancestry, Modifiable Cancer Risk Factors, and Clinical Factors. Clinical Cancer Research. 2022;28(2):318-26.

42. Abida W, Armenia J, Gopalan A, Brennan R, Walsh M, Barron D, et al. Prospective Genomic Profiling of Prostate Cancer Across Disease States Reveals Germline and Somatic Alterations That May Affect Clinical Decision Making. JCO Precision Oncology. 2017(1):1-16.

43. Abeshouse A, Ahn J, Akbani R, Ally A, Amin S, Andry Christopher D, et al. The Molecular Taxonomy of Primary Prostate Cancer. Cell. 2015;163(4):1011-25.

44. Armenia J, Wankowicz SAM, Liu D, Gao J, Kundra R, Reznik E, et al. The long tail of oncogenic drivers in prostate cancer. Nature Genetics. 2018;50(5):645-51.

45. Nguyen B, Mota JM, Nandakumar S, Stopsack KH, Weg E, Rathkopf D, et al. Pan-cancer Analysis of CDK12 Alterations Identifies a Subset of Prostate Cancers with Distinct Genomic and Clinical Characteristics. European Urology. 2020;78(5):671-9.

46. Chakraborty G, Nandakumar S, Hirani R, Nguyen B, Stopsack KH, Kreitzer C, et al. The Impact of PIK3R1 Mutations and Insulin–PI3K–Glycolytic Pathway Regulation in Prostate Cancer. Clinical Cancer Research. 2022;28(16):3603-17.

47. Abida W, Cyrta J, Heller G, Prandi D, Armenia J, Coleman I, et al. Genomic correlates of clinical outcome in advanced prostate cancer. Proceedings of the National Academy of Sciences. 2019;116(23):11428-36.

48. Stopsack KH, Nandakumar S, Wibmer AG, Haywood S, Weg ES, Barnett ES, et al. Oncogenic Genomic Alterations, Clinical Phenotypes, and Outcomes in Metastatic Castration-Sensitive Prostate Cancer. Clinical Cancer Research. 2020;26(13):3230-8.

49. Taylor BS, Schultz N, Hieronymus H, Gopalan A, Xiao Y, Carver BS, et al. Integrative Genomic Profiling of Human Prostate Cancer. Cancer Cell. 2010;18(1):11-22.

50. Gerhauser C, Favero F, Risch T, Simon R, Feuerbach L, Assenov Y, et al. Molecular Evolution of Early-Onset Prostate Cancer Identifies Molecular Risk Markers and Clinical Trajectories. Cancer Cell. 2018;34(6):996-1011.e8.

51. Du Y, Long Q, Guan B, Mu L, Tian J, Jiang Y, et al. Robot-Assisted Radical Prostatectomy Is More Beneficial for Prostate Cancer Patients: A System Review and Meta-Analysis. Medical science monitor : international medical journal of experimental and clinical research. 2018;24:272-87.

52. Ferlay J EM, Lam F, Colombet M, Mery L, Piñeros M, Znaor A, Soerjomataram I, Bray F Global Cancer Observatory: Cancer Today. : Lyon, France: International Agency for Research on Cancer; 2020 [Available from: https://gco.iarc.fr/today,.

53. Sung H, Ferlay J, Siegel RL, Laversanne M, Soerjomataram I, Jemal A, et al. Global Cancer Statistics 2020: GLOBOCAN Estimates of Incidence and Mortality Worldwide for 36 Cancers in 185 Countries. CA: A Cancer Journal for Clinicians. 2021;71(3):209-49.

54. Ferlay J, Colombet M, Soerjomataram I, Mathers C, Parkin DM, Piñeros M, et al. Estimating the global cancer incidence and mortality in 2018: GLOBOCAN sources and methods. Int J Cancer. 2019;144(8):1941-53.

55. Fletcher SA, Marchese M, Cole AP, Mahal BA, Friedlander DF, Krimphove M, et al. Geographic Distribution of Racial Differences in Prostate Cancer Mortality. JAMA Network Open. 2020;3(3):e201839-e.

56. Weerakoon M, Papa N, Lawrentschuk N, Evans S, Millar J, Frydenberg M, et al. The current use of active surveillance in an Australian cohort of men: a pattern of care analysis from the Victorian Prostate Cancer Registry. BJU International. 2015;115(S5):50-6.

57. Ackerman LA, Rosai J. Surgical pathology. Surgical pathology1974. p. 1394-.
