# Supplementary material for: How clinically relevant and inclusive are prostate cell lines?
Source: Research Square preprint supplement (doi:10.21203/rs.3.rs-6355469/v1), 2025-05-07
Supplement: Supplementary file 4 [file a1380ccfef452e6c37caacfa.docx]

**Supplementary Methods**

Here we have provided additional information on the methods used for this project developing on those already stated in the main manuscript.

2.1 The clinical relevance of PCa cell lines

A literature search was performed and detailed variables of PCa cell lines were collated. Sailer et.al’s paper contained a list of 42 cell lines1 and three additional cells lines were included from the prostate adenocarcinoma MSK study along with a new cell line derived from an Afro-Caribbean patient, selected for inclusion due to the lack of available models representing this cohort of distinct unmet clinical need 2. cBioPortal is an open access gold standard platform for comparison of large patient cohorts from multiple institutes3,4. From cBioPortal, 24 PCa studies containing multi omics datasets from 10,239 patients were analysed, and an additional published study with 45 Nigerian patients was also included5. The collated clinical cohort and cell line data were compared available global data, where available to assess their broader relevance. Often this was in fact from single countries and used as proxies due to lack of available data.

Initial variables searched for are shown in Supplementary Table 1 but not all cell lines had available data for each variable (Supplementary Table 2). The number of citations for each cell line was recorded as the highest number of results from databases Ovid MEDLINE or Web of Science Core Collection using search strategy “((cell line name) OR (cell line name with no hyphen or spaces) AND prostate).” This was done to maximise the identification of relevant cell line literature despite differing notations, whilst yielding only relevant studies by including “prostate”.

To compare cell lines against clinical cohorts the clinical variables analysed on cBioPortal included age at sample collection, geographical location, race, cancer type, Gleason grade and metastatic stage. Clinical cohorts in scientific studies are often selected based on specific clinical course or patient features, and thus we analysed the broader relevance of both cell lines and the clinical cohort against PCa patients worldwide (Supplementary Table 3). Age at sample collection was analysed using a systematic review on robotic radical prostatectomy with a large patient cohort from 33 studies in 14 different countries6. There is often confusion regarding the correct terminology for race, ethnicity or ancestry. We followed guidance from epidemiologists at our centre and the Office for National Statistics (ONS) in the United Kingdom who use the term ethnicity7. To analyse the ethnicity distribution of prostate cancer incidence, a paper from the Journal of the American Medical Association (JAMA) was used as a proxy to represent worldwide PCa ethnicity demographics8. Their large cohort of almost 230,000 patients were from the Surveillance, Epidemiology, and End Results (SEER) database9. Currently there is no publicly available database encompassing race data in PCa as opposed to geographical distribution. The SEER database encompasses 18 geographic areas in the United States and despite the paper only using US data it was deemed suitable because of the large patient cohort and because all PCa clinical cohorts on cBioPortal except the Prostate Adenocarcinoma (CPC-GENE, Nature 2017) study10 had a minimum of one American institution collaborator. The SEER databse was also used to investigate the proportion of patients with cancer stages one to four at diagnosis. Average worldwide Gleason grade was calculated using a large Australian study documenting Gleason grade at diagnosis. The figure for proportion of different PCa types is not definitive and so a figure from a classical book on surgical pathology by Ackerman et.al with over 3500 citations was used11. Prior treatment history of cell lines and clinical cohorts was also investigated. No worldwide source was used for comparison due to the vast heterogeneity of treatment in healthcare systems globally.

2.2 The biological relevance of PCa cell lines

To analyse the biological features of cell lines the KEGG prostate cancer gene set was used (systematic name M13191,12-14). The Kyoto Encyclopaedia of Genes and Genomes (KEGG), details the most important gene alterations in PCa by linking genomic and functional information with knowledge on cellular processes involved in oncogenesis. A further ten cell lines had limited biologic data available on the COSMIC (Catalogue of Somatic Mutations in Cancer) database (Supplementary Table 2) but often had few genes or only mutational data analysed, thus, were not analysed in depth in our study. The biological variables screened for in each cell line is shown in Supplementary Table 4.

The clinical cohorts on cBioPortal used to compare biological data in this study were selected on the basis of all having at least 200 patients and biological data of at least two alteration types. Additionally, a study of neuroendocrine PCa 15 was included due to many 3D models taking on a neuroendocrine phenotype in vitro and ex vivo in laboratory settings and to allow comparison of different PCa types.

A heatmap identifying which cell lines are most suited to investigate specific molecular pathways was created and the KEGG PCa gene set was used to identify the top 50 pathways genes from the gene set were involved in (number of genes from the set involved in the pathway/ total number of genes involved in that pathway). The proportion related to the colour was the number of genes altered in each cell line/ total number of genes involved in that pathway.

2.3 Statistical Analysis

All raw data was recorded on Microsoft Excel. Tests for normality used in this study were the D’Agostino &Pearson, Anderson-Darling, Shapiro-Wilkins, and the Kolmogrov-Smirnov tests.

This study focused on the clinical and biological relevance of prostate cancer cell lines by thoroughly investigating various variables pertinent to translational research and clinical applicability. Age and ethnicity of cell lines have been explored to comprehend their impact on disease progression and treatment response, unveiling potential disparities in outcomes. Additionally, we examined Gleason grade and cancer type to ascertain the representativeness of cell line models across different disease stages and subtypes within prostate cancer. The assessment of treatment history aids in understanding drug resistance mechanisms and informs the development of novel therapeutic strategies for refractory disease. Our investigation encompassed multiomics variables including mutations, copy number alterations, structural variants, microsatellite instability, mRNA and protein expression, and tumour mutational burden in cell lines, facilitating a comprehensive analysis of molecular features reflective of patient tumours.

1. Sailer V, von Amsberg G, Duensing S, et al. Experimental in vitro, ex vivo and in vivo models in prostate cancer research. *Nature Reviews Urology*. 2023/03/01 2023;20(3):158-178. doi:10.1038/s41585-022-00677-z

2. Valentine H, Aiken W, Morrison B, et al. Expanding the Prostate Cancer Cell Line Repertoire with ACRJ-PC28, an AR-negative Neuroendocrine Cell Line Derived From an African-Caribbean Patient. *Cancer Research Communications*. 2022;2(11):1355-1371. doi:10.1158/2767-9764.Crc-22-0245

3. Gao J, Aksoy BA, Dogrusoz U, et al. Integrative analysis of complex cancer genomics and clinical profiles using the cBioPortal. *Sci Signal*. Apr 2 2013;6(269):pl1. doi:10.1126/scisignal.2004088

4. Cerami E, Gao J, Dogrusoz U, et al. The cBio cancer genomics portal: an open platform for exploring multidimensional cancer genomics data. *Cancer Discov*. May 2012;2(5):401-4. doi:10.1158/2159-8290.Cd-12-0095

5. White JA, Kaninjing ET, Adeniji KA, et al. Whole-exome Sequencing of Nigerian Prostate Tumors from the Prostate Cancer Transatlantic Consortium (CaPTC) Reveals DNA Repair Genes Associated with African Ancestry. *Cancer Research Communications*. 2022;2(9):1005-1016. doi:10.1158/2767-9764.Crc-22-0136

6. Du Y, Long Q, Guan B, et al. Robot-Assisted Radical Prostatectomy Is More Beneficial for Prostate Cancer Patients: A System Review and Meta-Analysis. *Medical science monitor : international medical journal of experimental and clinical research*. 2018;24:272-287. doi:10.12659/msm.907092

7. Statistics OfN. Ethnic group, national identity and religion. Accessed 06 March, 2024. <https://www.ons.gov.uk/methodology/classificationsandstandards/measuringequality/ethnicgroupnationalidentityandreligion>

8. Fletcher SA, Marchese M, Cole AP, et al. Geographic Distribution of Racial Differences in Prostate Cancer Mortality. *JAMA Network Open*. 2020;3(3):e201839-e201839. doi:10.1001/jamanetworkopen.2020.1839

9. Institute. NC. Data from: SEER*Statdatabase: November 2016 submission

. Deposited Released April 2017.

10. Fraser M, Sabelnykova VY, Yamaguchi TN, et al. Genomic hallmarks of localized, non-indolent prostate cancer. *Nature*. 2017/01/01 2017;541(7637):359-364. doi:10.1038/nature20788

11. Ackerman LA, Rosai J. Surgical pathology. *Surgical pathology*. 1974:1394-1394.

12. Kanehisa M, Goto S. KEGG: kyoto encyclopedia of genes and genomes. *Nucleic Acids Res*. Jan 1 2000;28(1):27-30. doi:10.1093/nar/28.1.27

13. Kanehisa M. Toward understanding the origin and evolution of cellular organisms. *Protein Sci*. Nov 2019;28(11):1947-1951. doi:10.1002/pro.3715

14. Kanehisa M, Furumichi M, Sato Y, Kawashima M, Ishiguro-Watanabe M. KEGG for taxonomy-based analysis of pathways and genomes. *Nucleic Acids Res*. Jan 6 2023;51(D1):D587-d592. doi:10.1093/nar/gkac963

15. Beltran H, Prandi D, Mosquera JM, et al. Divergent clonal evolution of castration-resistant neuroendocrine prostate cancer. *Nat Med*. Mar 2016;22(3):298-305. doi:10.1038/nm.4045
